# Supplementary material
Source: publisher figshare collection journal article supplement (https://acs.figshare.com/ndownloader/files/4014592)

# Photooxygenation of Azidoalkyl Furans: Catalyst Free Triazole and New Endoperoxide Rearrangement

Elif Akin Kazancioglu, Mustafa Zahritin Kazancioglu, Meryem Fistikci, Hasan Secen and Ramazan Altundas\*

*Department of Chemistry, Ataturk University, 25240 Erzurum, Turkey*

[ramazanaltundas@atauni.edu.tr](mailto:ramazanaltundas@atauni.edu.tr)

## Table of Contents

|                                                                                     |                     |     |
|-------------------------------------------------------------------------------------|---------------------|-----|
| General Information                                                                 |                     | S9  |
| General Procedures for Starting Materials                                           |                     | S9  |
| General Procedures for Photooxygenation                                             |                     | S34 |
| References                                                                          |                     | S41 |
| 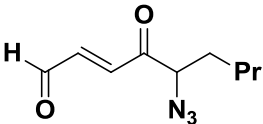   | Procedure           | S34 |
|                                                                                     | <sup>1</sup> H NMR  | S46 |
|                                                                                     | <sup>13</sup> C NMR | S47 |
|   | Procedure           | S11 |
|                                                                                     | <sup>1</sup> H NMR  | S42 |
|                                                                                     | <sup>13</sup> C NMR | S43 |
|  | Procedure           | S11 |
|                                                                                     | <sup>1</sup> H NMR  | S44 |
|                                                                                     | <sup>13</sup> C NMR | S45 |

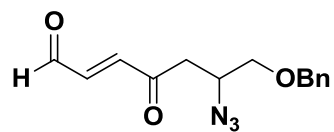

**Procedure**

**S35**

**<sup>1</sup>H NMR**

**S52**

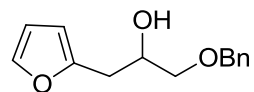

Procedure

S12

<sup>1</sup>H NMR

S48

<sup>13</sup>C NMR

S49

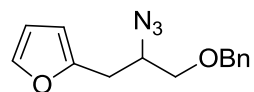

Procedure

S13

<sup>1</sup>H NMR

S50

<sup>13</sup>C NMR

S51

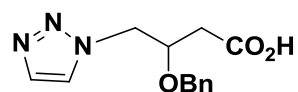

**Procedure**

**S35**

**<sup>1</sup>H NMR**

**S59**

**<sup>13</sup>C NMR**

**S60**

**APT**

**S61**

**NOESY**

**S62**

**COSY**

**S63**

**HMQC**

**S64**

**HMBC**

**S65**

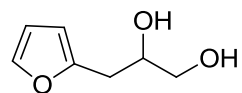

Procedure

S13

<sup>1</sup>H NMR

S53

<sup>13</sup>C NMR

S54

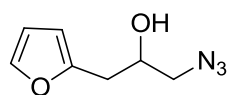

Procedure

S14

<sup>1</sup>H NMR

S55

<sup>13</sup>C NMR

S56

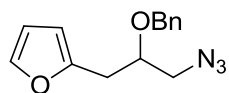

Procedure

S15

<sup>1</sup>H NMR

S57

<sup>13</sup>C NMR

S58

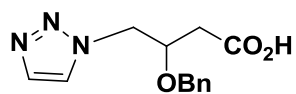

**Procedure**

**S35**

**<sup>1</sup>H NMR**

**S59**

**<sup>13</sup>C NMR**

**S60**

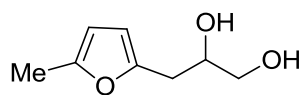

Procedure

S15

<sup>1</sup>H NMR

S66

<sup>13</sup>C NMR

S67

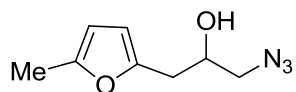

Procedure

S16

<sup>1</sup>H NMR

S68

<sup>13</sup>C NMR

S69

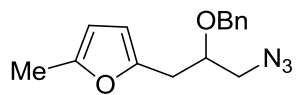

Procedure

S16

<sup>1</sup>H NMR

S70

<sup>13</sup>C NMR

S71

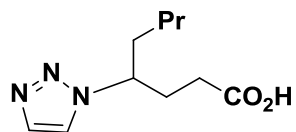

**Procedure**

**S36**

**<sup>1</sup>H NMR**

**S80**

**<sup>13</sup>C NMR**

**S81**

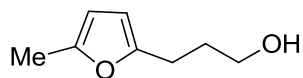

Procedure

S17

<sup>1</sup>H NMR

S72

<sup>13</sup>C NMR

S73

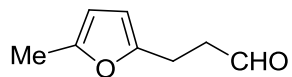

Procedure

S18

<sup>1</sup>H NMR

S74

<sup>13</sup>C NMR

S75

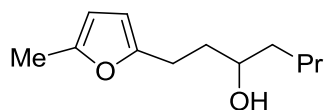

Procedure

S18

<sup>1</sup>H NMR

S76

<sup>13</sup>C NMR

S77

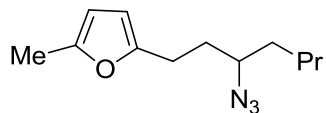

Procedure

S19

<sup>1</sup>H NMR

S78

<sup>13</sup>C NMR

S79

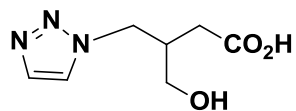

**Procedure**

**S37**

**<sup>1</sup>H NMR**

**S90**

**<sup>13</sup>C NMR**

**S91**

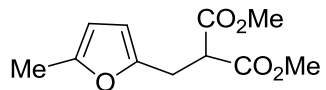

Procedure

S19

<sup>1</sup>H NMR

S82

<sup>13</sup>C NMR

S83



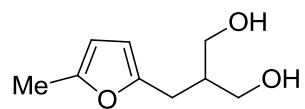

Procedure

S20

<sup>1</sup>H NMR

S84

<sup>13</sup>C NMR

S85

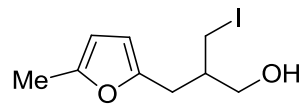

Procedure

S21

<sup>1</sup>H NMR

S86

<sup>13</sup>C NMR

S87

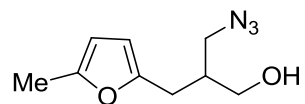

Procedure

S22

<sup>1</sup>H NMR

S88

<sup>13</sup>C NMR

S89

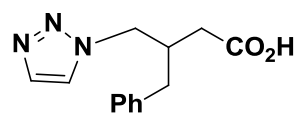

**Procedure**

**S38**

<sup>1</sup>H NMR

**S100**

<sup>13</sup>C NMR

**S101**

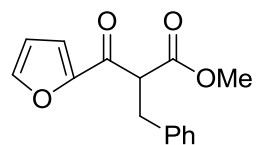

Procedure

S22

<sup>1</sup>H NMR

S92

<sup>13</sup>C NMR

S93

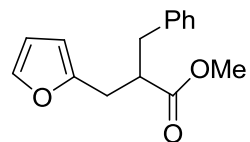

Procedure

S23

<sup>1</sup>H NMR

S94

<sup>13</sup>C NMR

S95

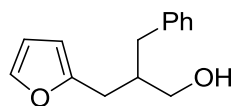

|                     |     |
|---------------------|-----|
| Procedure           | S23 |
| $^1\text{H}$ NMR    | S96 |
| $^{13}\text{C}$ NMR | S97 |

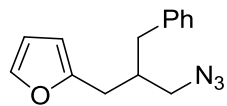

|                     |     |
|---------------------|-----|
| Procedure           | S24 |
| <sup>1</sup> H NMR  | S98 |
| <sup>13</sup> C NMR | S99 |

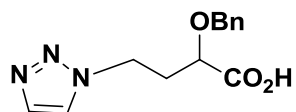

|                                       |             |
|---------------------------------------|-------------|
| <b>Procedure</b>                      | <b>S38</b>  |
| <b><math>^1\text{H}</math> NMR</b>    | <b>S110</b> |
| <b><math>^{13}\text{C}</math> NMR</b> | <b>S111</b> |

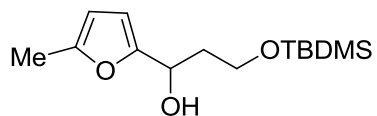

|                     |      |
|---------------------|------|
| Procedure           | S25  |
| <sup>1</sup> H NMR  | S102 |
| <sup>13</sup> C NMR | S103 |

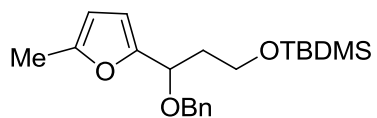

|                     |      |
|---------------------|------|
| Procedure           | S26  |
| <sup>1</sup> H NMR  | S104 |
| <sup>13</sup> C NMR | S105 |

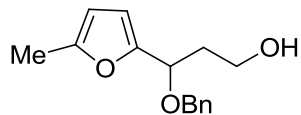

|                     |      |
|---------------------|------|
| Procedure           | S26  |
| $^1\text{H}$ NMR    | S106 |
| $^{13}\text{C}$ NMR | S107 |

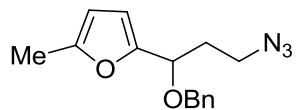

|                    |      |
|--------------------|------|
| Procedure          | S27  |
| <sup>1</sup> H NMR | S108 |

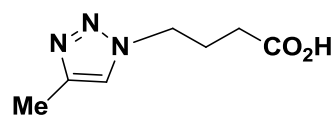

<sup>13</sup>C NMR

S109

**Procedure**

**S39**

<sup>1</sup>H NMR

**S116**

<sup>13</sup>C NMR

**S117**

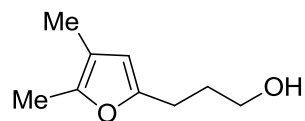

Procedure

S28

<sup>1</sup>H NMR

S112

<sup>13</sup>C NMR

S113

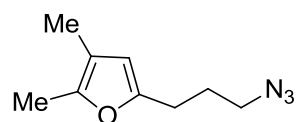

Procedure

S28

<sup>1</sup>H NMR

S114

<sup>13</sup>C NMR

S115

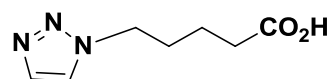

**Procedure**

**S39**

<sup>1</sup>H NMR

**S122**

<sup>13</sup>C NMR

**S123**

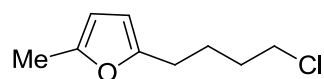

Procedure

S29

<sup>1</sup>H NMR

S118

<sup>13</sup>C NMR

S119

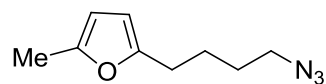

Procedure

S29

<sup>1</sup>H NMR

S120

<sup>13</sup>C NMR

S121

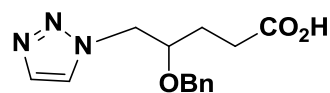

**Procedure**

**S40**

<sup>1</sup>H NMR

**S132**

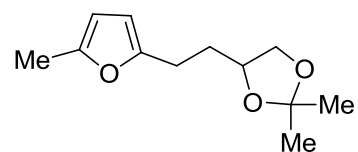

**$^{13}\text{C}$  NMR**

**S133**

Procedure

S30

$^1\text{H}$  NMR

S124

$^{13}\text{C}$  NMR

S125

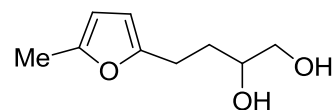

Procedure

S31

$^1\text{H}$  NMR

S126

$^{13}\text{C}$  NMR

S127

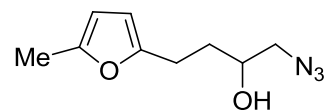

Procedure

S31

$^1\text{H}$  NMR

S128

$^{13}\text{C}$  NMR

S129

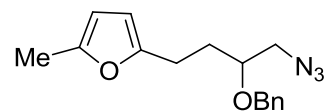

Procedure

S32

$^1\text{H}$  NMR

S130

$^{13}\text{C}$  NMR

S131

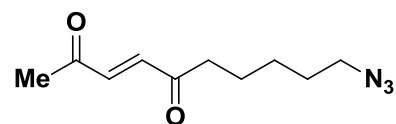

**Procedure**

S41

**$^1\text{H}$  NMR**

S138

**$^{13}\text{C}$  NMR**

S139

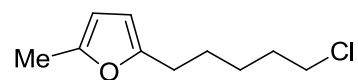

Procedure

S33

$^1\text{H}$  NMR

S134

$^{13}\text{C}$  NMR

S135

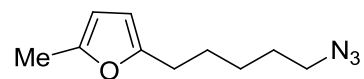

Procedure

S33

|                     |      |
|---------------------|------|
| <sup>1</sup> H NMR  | S136 |
| <sup>13</sup> C NMR | S137 |

## 1. General Information

All reactions were performed under nitrogen atmosphere. All commercial reagents and chromatography solvents were used as obtained unless otherwise stated. Anhydrous solvents were distilled over appropriate drying agents prior to use. Analytical thin layer chromatography (TLC) was performed on Merck silica gel 60 F<sub>254</sub>. Fluka Silica gel 60 (0.063-0.2 mm) was used for column chromatography. Radial chromatography plates were prepared with Merck silica gel 60 PF<sub>254</sub>-gypsum. TLC visualization was accomplished with UV light (254 nm) and by staining with ethanolic PMA (phosphomolybdic acid) solution. Elemental analyses were performed on a Leco CHNS-932. IR spectra were recorded on a Perkin Elmer Spectrum One FT-IR Spectrometer. High resolution mass spectra were measured on a Bruker Daltonics micrOTOF-Q. NMR spectra were recorded using a Varian 200 MHz NMR instrument (<sup>1</sup>H NMR at 200 MHz, <sup>13</sup>C NMR at 50 MHz) or a Varian 400 MHz instrument (<sup>1</sup>H NMR at 400 MHz, <sup>13</sup>C NMR at 100 MHz). <sup>1</sup>H NMR data are reported as follows: chemical shift ( $\delta$  ppm), multiplicity (s=singlet, d=dublet, dd=dublet of doublets, ddd=dublet of doublets of doublets, brs=broad singlet, t=triplet, q=quartet, quint=quintet, m=multiplet or otherwise stated), integration, coupling constant (*J*, Hz). <sup>13</sup>C NMR data are given in terms of chemical shift ( $\delta$  ppm).

## 2. General Procedures for Starting Materials

### 2a. General procedure for the benzyl protection of alcohols

To a suspension of NaH (2 equiv) in dry THF was added alcohol at 0 °C under argon atmosphere and stirred for 30 min. BnBr (1.2 equiv) was then added to the reaction mixture and allowed to warm to rt. The reaction was monitored with TLC. Upon completion, the reaction was quenched with water and concentrated in vacuo. Residue was extracted with ethyl acetate, dried over with Na<sub>2</sub>SO<sub>4</sub>, filtered, and then the solvent was removed under reduced pressure. The residue was purified by radial chromatography or column chromatography (EtOAc/hexanes) to afford the benzyl protected alcohol.

### 2b. General procedure for the preparation of alkylfurans

To a solution of furan in anhydrous THF was added *n*-BuLi at -78 °C under nitrogen atmosphere. The resulting mixture was stirred for 2 h while warming to -5 °C. After 2 h at -5 °C, it was treated with glycidol, aldehydes and alkyl halides. Upon completion judged by TLC, the reaction was

quenched with saturated aqueous  $\text{NH}_4\text{Cl}$ . The reaction mixture was extracted with EtOAc. The organic layers were dried over with  $\text{Na}_2\text{SO}_4$ , filtered and concentrated in vacuo. The residues were purified by radial chromatography or column chromatography (EtOAc/hexanes) to afford the corresponding alkylfurans.

## **2c. General Procedure for azidoalkylfurans from alcohols**

To a solution of alcohol (1 equiv) in dry DCM was added  $\text{NEt}_3$  (1.2 equiv) at 0 °C under argon atmosphere and stirred for 5 min.  $\text{MsCl}$  (1.1 equiv) was then added and allowed to warm to rt. Upon the completion of the reaction judged by TLC, it was quenched with  $\text{H}_2\text{O}$ . The organic layer was separated and the aqueous layer was extracted with EtOAc. The combined organic layers were dried over with  $\text{Na}_2\text{SO}_4$  and concentrated in vacuo. The residue was used directly without further purification.

A mixture of  $\text{NaN}_3$  (4 equiv) and crude material in DMF was heated at 70 °C under argon atmosphere. Upon completion judged by TLC, the reaction was quenched with  $\text{H}_2\text{O}$  and extracted with hexane or ethyl acetate. The organic layer was dried over with  $\text{Na}_2\text{SO}_4$ , filtered and concentrated in vacuo. The residue was purified by radial chromatography or column chromatography (EtOAc/hexanes) to afford azidoalkylfuran.

## **2d. General Procedure for azidoalkylfuran from furanalkylhalide**

A mixture of furan or methyl furanalkylhalide (1 equiv) and  $\text{NaN}_3$  (4 equiv) in DMF was heated at 70 °C under nitrogen atmosphere. Upon completion judged by TLC, the reaction was quenched with  $\text{H}_2\text{O}$ . The aqueous mixture was extracted with hexane or ethyl acetate. The combined layer was dried over with  $\text{Na}_2\text{SO}_4$  and concentrated in vacuo. The residue was purified by radial or column chromatography (silica gel, hexane) to afford the pure furan or methyl furanalkylhalide derivative.

## **1-(Furan-2-yl)pentan-1-ol (26)**

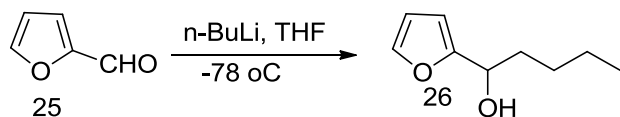

To a solution of furfural (4.5 g, 46.83 mmol) in dry THF (100 mL) at -78 °C under N<sub>2</sub> was added *n*-BuLi (29 mL, 46.83 mmol, 1.6 M solution in hexanes). The reaction mixture was stirred a further 1.5 h at -78 °C. After 1.5 h, the reaction mixture was quenched with NH<sub>4</sub>Cl (50 mL) and extracted with EtOAc (2x50 mL). The combined organic layers were dried over with MgSO<sub>4</sub>, filtered and concentrated in vacuo. The crude material was purified by silica gel column chromatography (1:4, EtOAc/hexanes) to afford **26** (4.6 g, 64%, *R*<sub>f</sub>=0.36, 1:4) as a light yellow liquid.

IR (neat, cm<sup>-1</sup>) 3348, 2957, 2933, 2862, 1504, 1466, 1378, 1148.

<sup>1</sup>H NMR (400 MHz, CDCl<sub>3</sub>) δ 7.35 (d, *J*=0.9 Hz, 1H), 6.31 (m, 1H), 6.21 (d, *J*=3.2 Hz, 1H), 4.64 (t, *J*=6.8 Hz, 1H), 2.11 (s, 1H), 1.90-1.79 (m, 2H), 1.45-1.22 (m, 4H), 0.90 (t, *J*=7.0 Hz, 3H).

<sup>13</sup>C NMR (100 MHz, CDCl<sub>3</sub>) δ 157.1, 142.0, 110.3, 106.0, 68.0, 35.5, 27.9, 22.7, 14.2.

## 2-(1-Azidopentyl)furan (**1**)

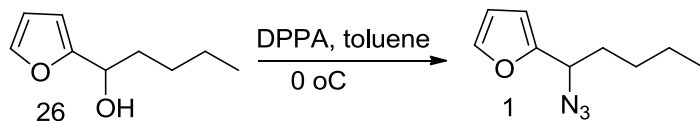

To a solution of **26** (4.6 g, 29.85 mmol) in dry toluene (100 mL) at 0 °C under N<sub>2</sub> was added DPPA (7.72 mL, 35.82 mmol) followed by DBU (5.35 mL, 35.82 mmol). The reaction mixture was allowed to warm to rt and stirred for 13 h. It was washed with water (50 mL) and NH<sub>4</sub>Cl (50 mL). The mixture was extracted with EtOAc (3x75 mL). The combined organic layers were dried over with MgSO<sub>4</sub>, filtered and concentrated in vacuo. The crude material was purified by silica gel column chromatography to afford **1** (3.71 g, 69%, *R*<sub>f</sub>=0.7, EtOAc/hexanes, 1:4) as a light yellow liquid.

IR (neat, cm<sup>-1</sup>) 3053, 2959, 2863, 2101, 1265, 1012.

$^1\text{H}$  NMR (400 MHz,  $\text{CDCl}_3$ )  $\delta$  7.41 (d,  $J=0.9$  Hz, 1H), 6.36 (m, 1H), 6.30 (d,  $J=3.2$  Hz, 1H), 4.37 (t,  $J=7.4$  Hz, 1H), 1.94-1.82 (m, 2H), 1.45-1.26 (m, 4H), 0.91 (t,  $J=6.9$  Hz, 3H).

$^{13}\text{C}$  NMR (100 MHz,  $\text{CDCl}_3$ )  $\delta$  152.8, 142.9, 110.4, 107.8, 59.1, 32.5, 28.5, 22.5, 14.2.

### 1-(Benzyloxy)-3-(furan-2-yl)propan-2-ol (**29**)

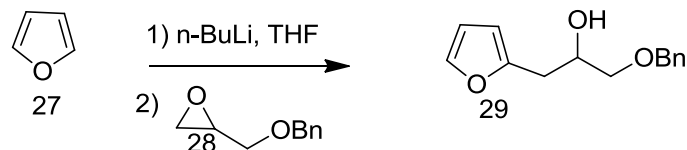

The general procedure for the preparation of alkylfurans was employed with dry THF (80 mL), **28** 14.00 g (85.26 mmol), furan (12.4 mL, 170.65 mmol),  $n\text{-BuLi}$  (72.00 mL, 179.17 mmol, 2.5 M in hexanes). Purification by silica gel column chromatography afforded **29** (7.00 g, 35%,  $R_f=0.16$ , EtOAc/hexanes, 1:5) as a yellow liquid.

IR (neat,  $\text{cm}^{-1}$ ) 3432, 3116, 3064, 3031, 2914, 2863, 1599, 1497, 1507, 1453, 1098, 1028, 1008.

$^1\text{H}$  NMR (400 MHz,  $\text{CDCl}_3$ )  $\delta$  7.38-7.28 (m, 6H), 6.30 (dd,  $J=3.1$  Hz,  $J=1.9$  Hz, 1H), 6.11-6.08 (m, 1H), 4.59-4.53 (m, 2H), 4.12 (m, 1H), 3.54 (dd,  $J=9.5$  Hz,  $J=3.66$  Hz, 1H), 3.42 (dd,  $J=9.5$  Hz,  $J=6.8$  Hz, 1H), 2.91-2.80 (m, 2H), 2.43 (d,  $J=4.0$  Hz, 1H).

$^{13}\text{C}$  NMR (100 MHz,  $\text{CDCl}_3$ )  $\delta$  152.4, 141.7, 138.1, 128.7, 128.0, 128.0, 110.5, 107.2, 73.7, 73.6, 69.5, 32.6.

### 2-(2-Azido-3-(benzyloxy)propyl)furan (**4**)



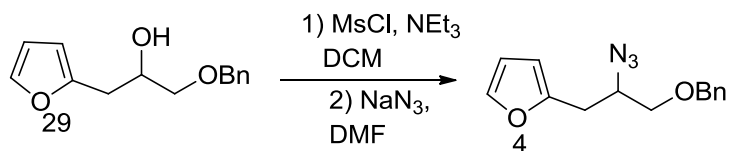

The general procedure for the azidoalkylfurans from alcohols was employed with DCM (80 mL), **29** (3.06 g, 13.17 mmol), MsCl (1.03 mL, 13.19 mmol) and NEt<sub>3</sub> (2.75 mL, 19.78 mmol) to afford the crude (4.06 g).

DMF (15 mL), NaN<sub>3</sub> (4.30 g, 65.95 mmol) and the crude (3.50 g). Purification by silica gel column chromatography afforded **4** (2.95 g, 87%, *R<sub>f</sub>*=0.75, EtOAc/hexanes, 1:9) as a yellow liquid.

IR (neat, cm<sup>-1</sup>) 3707, 3031, 2863, 2110, 1504, 1454, 1362, 1266.

<sup>1</sup>H NMR (400 MHz, CDCl<sub>3</sub>) δ 7.41-7.28 (m, 6H), 6.32 (dd, *J*=3.2 Hz, *J*=1.9 Hz, 1H), 6.12 (dd, *J*=3.2 Hz, *J*=0.7 Hz, 1H), 4.58 (s, 2H), 3.87 (m, 1H), 3.61 (dd, *J*=9.9 Hz, *J*=4.0 Hz, 1H), 3.52 (dd, *J*=9.9 Hz, *J*=6.6 Hz, 1H), 2.92 (dd, *J*=15.2 Hz, *J*=6.1 Hz, 1H), 2.86 (dd, *J*=15.2 Hz, *J*=7.6 Hz, 1H).

<sup>13</sup>C NMR (100 MHz, CDCl<sub>3</sub>) δ 151.5, 141.9, 138.0, 128.7, 128.0, 127.8, 110.6, 107.7, 73.7, 72.1, 60.6, 30.1.

### 3-(Furan-2-yl)propane-1,2-diol (**31**)

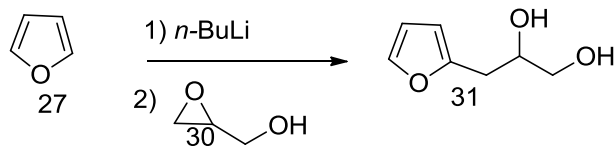

The general procedure for the preparation of alkylfurans was employed with THF (60 mL), glycidol (2.00 g, 27.00 mmol), furan (4.00 mL, 54.00 mmol) and *n*-BuLi (35.40 mL, 56.70 mmol, 1.6 M in hexanes). Purification by silica gel column chromatography afforded **31** (2.98 g, 78%, *R<sub>f</sub>*=0.3, EtOAc/hexanes, 3:2) as a yellow liquid.

IR (neat,  $\text{cm}^{-1}$ ) 3432, 3116, 3064, 3031, 2914, 2863, 1599, 1497, 1507, 1453, 1098, 1028, 1008.

$^1\text{H}$  NMR (400 MHz,  $\text{CDCl}_3$ )  $\delta$  7.30 (m, 1H), 6.28 (dd,  $J=3.1$  Hz,  $J=1.9$  Hz, 1H), 6.08 (m, 1H), 3.95 (m, 1H), 3.63-3.41 (m, 4H), 2.82-2.71 (m, 2H).

$^{13}\text{C}$  NMR (100 MHz,  $\text{CDCl}_3$ )  $\delta$  152.3, 141.8, 110.6, 107.3, 71.1, 66.1, 32.3.

### 1-Azido-3-(furan-2-yl)propan-2-ol (**33**)

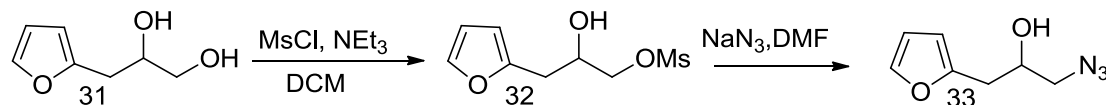

The general procedure for azidoalkylfurans from alcohols was employed with  $\text{DCM}$  (70 mL), **31** (3.46 g, 24.35 mmol),  $\text{MsCl}$  (1.9 mL, 24.35 mmol) and  $\text{NEt}_3$  (6.77 mL, 48.53 mmol) to afford crude **32** (5.36 g, 24.35 mmol). It was used in the next step without purification.

$\text{DMF}$  (20 mL),  $\text{NaN}_3$  (6.33 g, 97.40 mmol) and the crude **32** (5.36 g). Purification by silica gel column chromatography afforded **33** (1.33 g, 33%,  $R_f=0.7$ ,  $\text{EtOAc}$ /hexanes, 2:3) as a yellow liquid.

IR (neat,  $\text{cm}^{-1}$ ) 3399, 2923, 2104, 1599, 1507, 1441, 1347, 1290, 1146, 1081, 1009.

$^1\text{H}$  NMR (400MHz,  $\text{CDCl}_3$ )  $\delta$  7.35 (m, 1H), 6.31 (dd,  $J=2.9$  Hz,  $J=2.1$  Hz, 1H), 6.14 (m, 1H), 4.06 (m, 1H), 3.38 (dd,  $J=12.5$  Hz,  $J=3.8$  Hz, 1H), 3.29 (dd,  $J=12.5$  Hz,  $J=6.7$  Hz, 1H), 2.86 (d,  $J=6.3$  Hz, 2H), 2.38 (d,  $J=4.5$  Hz, 1H).

$^{13}\text{C}$  NMR (100 MHz,  $\text{CDCl}_3$ )  $\delta$  151.5, 142.2, 110.6, 107.8, 69.8, 56.1, 33.4. **2-(3-Azido-2-(benzyloxy)propyl)furan (6)**

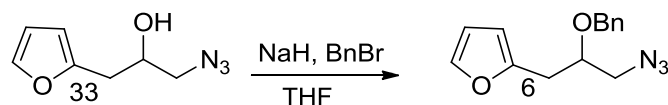

The general procedure for the benzyl protection of alcohols was employed with dry THF (30 mL), **33** (1.38 g, 8.25 mmol), NaH (396.20 mg, 16.50 mmol) and BnBr (1.30 mL, 10.73 mmol). Purification by silica gel column chromatography afforded **6** (1.86 g, 88%,  $R_f$ =0.8, EtOAc/hexanes, 1:4) as a light yellow liquid.

IR (neat,  $\text{cm}^{-1}$ ) 3448, 3065, 3031, 2924, 2868, 2101, 1599, 1506, 1454, 1350, 129.

$^1\text{H}$  NMR (400 MHz,  $\text{CDCl}_3$ )  $\delta$  7.45-7.33 (m, 6H), 6.37 (dd,  $J$ =3.2 Hz,  $J$ =1.9 Hz, 1H), 6.17 (m, 1H), 4.65 (d,  $J$ =11.5 Hz, 1H), 4.61 (d,  $J$ =11.5 Hz, 1H), 3.92 (m, 1H), 3.38 (dd,  $J$ =12.9 Hz,  $J$ =3.8 Hz, 1H), 3.33 (dd,  $J$ =12.9 Hz,  $J$ =6.1 Hz, 1H), 3.03 (dd,  $J$ =15.1 Hz,  $J$ =6.0 Hz, 1H), 2.94 (dd,  $J$ =15.1 Hz,  $J$ =6.8 Hz, 1H).

$^{13}\text{C}$  NMR (100 MHz,  $\text{CDCl}_3$ )  $\delta$  151.8, 141.8, 138.2, 128.7, 2x128.1, 110.8, 107.7, 77.3, 72.3, 54.0, 31.2.

### 3-(5-Methylfuran-2-yl)propane-1,2-diol (**35**)

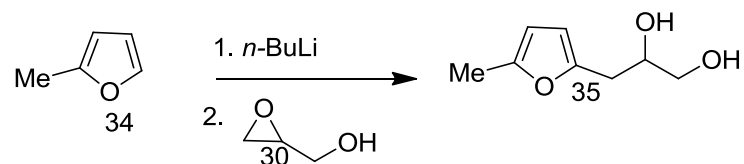

The general procedure for the preparation of alkylfurans was employed with THF (60 mL), glycidol (2.26 g, 30.5 mmol), 2-methylfuran (5.50 mL, 61.00 mmol), and  $n\text{-BuLi}$  (41.80 mL, 67.10 mmol, 1.6 M in hexanes). Purification on silica gel chromatography afforded **35** (3.20 g, 74%) as a yellow liquid.

IR (neat,  $\text{cm}^{-1}$ ) 3395, 2924, 1713, 1646, 1570, 1429, 1356.

$^1\text{H}$  NMR (400 MHz,  $\text{CDCl}_3$ )  $\delta$  5.93 (d,  $J$ =2.8 Hz, 1H), 5.83 (m, 1H), 3.93 (m, 1H), 3.80 (s, 2H), 3.60 (d,  $J$ =9.8 Hz, 1H), 3.43 (dd,  $J$ =11.4 Hz,  $J$ =7.1 Hz, 1H), 2.75-2.64 (m, 2H), 2.21 (s, 3H).

$^{13}\text{C}$  NMR (100 MHz,  $\text{CDCl}_3$ )  $\delta$  151.2, 150.4, 107.9, 106.3, 71.2, 66.1, 32.4, 13.7.

### 1-Azido-3-(5-methylfuran-2-yl)propan-2-ol (**37**)

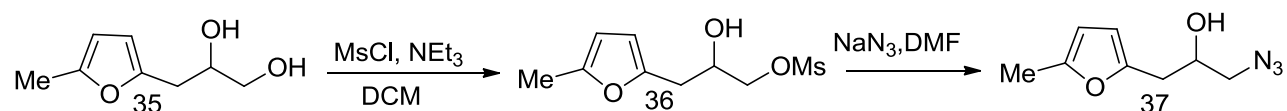

The general procedure for azidoalkylfurans from alcohols was employed with DCM (80 mL), **35** (2.93 g, 18.76 mmol), MsCl (1.46 mL, 18.76 mmol) and NEt<sub>3</sub> (3.90 mL, 28.13 mmol) to afford crude **36** (4.13 g). It was used in next step without purification.

DMF (18 mL), NaN<sub>3</sub> (4.88 g, 75.04 mmol) and the crude **36** (4.13 g). Purification by silica gel column chromatography afforded **37** (1.61 g, 47%, *R*<sub>f</sub>=0.6, EtOAc/hexanes, 1:4) as a yellow liquid.

IR (neat, cm<sup>-1</sup>) 3365, 2924, 2103, 1614, 1570.

<sup>1</sup>H NMR (400 MHz, CDCl<sub>3</sub>) δ 6.00 (d, *J*=3.0 Hz, 1H), 5.87 (m, 1H), 4.04 (m, 1H), 3.38 (dd, *J*=12.5 Hz, *J*=3.9 Hz, 1H), 3.30 (dd, *J*=12.5 Hz, *J*=6.7 Hz, 1H), 2.80 (d, *J*=6.3 Hz, 2H), 2.30 (brs, 1H), 2.25 (s, 3H).

<sup>13</sup>C NMR (100 MHz, CDCl<sub>3</sub>) δ 151.8, 149.4, 108.6, 106.4, 69.8, 56.1, 33.6, 13.7.

### 2-(3-Azido-2-(benzyloxy)propyl)-5-methylfuran (**8**)

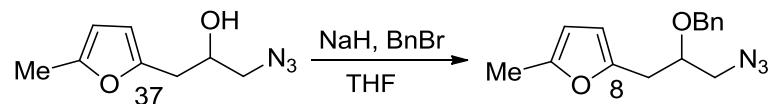

The general procedure for the benzyl protection of alcohols was employed with dry THF (35 mL), **37** (1.61 g, 8.88 mmol), NaH (426.00 mg, 17.76 mmol) and BnBr (1.97 mL, 11.52 mmol). Purification by silica gel column chromatography afforded **8** (1.90 g, 79%,  $R_f$ =0.8, EtOAc/hexanes, 1:4) as a colorless liquid.

IR (neat,  $\text{cm}^{-1}$ ) 3031, 2922, 2101, 1618, 1569, 1496, 1453.

$^1\text{H}$  NMR (400 MHz,  $\text{CDCl}_3$ )  $\delta$  7.39-7.29 (m, 5H), 5.99 (d,  $J$ =3.0 Hz, 1H), 5.90 (m, 1H), 4.63 (d,  $J$ =11.5 Hz, 1H), 4.60 (d,  $J$ =11.5 Hz, 1H), 3.87 (m, 1H), 3.37 (dd,  $J$ =13.0 Hz,  $J$ =3.9 Hz, 1H), 3.32 (dd,  $J$ =13.0 Hz,  $J$ =6.2 Hz, 1H), 2.96 (dd,  $J$ =15.1 Hz,  $J$ =5.8 Hz, 1H), 2.84 (dd,  $J$ =15.1 Hz,  $J$ =7.0 Hz, 1H), 2.28 (s, 3H).

$^{13}\text{C}$  NMR (100 MHz,  $\text{CDCl}_3$ )  $\delta$  151.3, 149.8, 138.2, 128.6, 128.1, 128.0, 108.3, 106.4, 77.4, 72.2, 54.0, 31.2, 13.7.

### 3-(5-Methylfuran-2-yl)propan-1-ol (**39**)

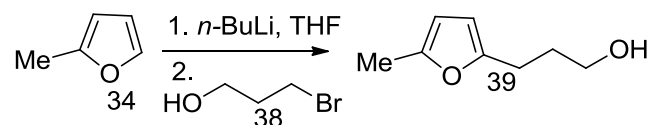

The general procedure for the preparation of alkylfurans was employed with dry THF (60 mL), 3-bromo-1-propanol (4.50 g, 32.37 mmol), 2-methylfuran (5.58 g, 6.13 mL, 67.98 mmol) and  $n\text{-BuLi}$  (44.51 mL, 71.22 mmol, 1.6 M in hexanes). Purification by silica gel column chromatography afforded **39** (3.52 g, 78%,  $R_f$ =0.3, EtOAc/hexane, 1:4) as a yellow liquid.

IR (neat,  $\text{cm}^{-1}$ ) 3337, 2950, 2924, 2878, 1618, 1571, 1447.

$^1\text{H}$  NMR (400 MHz,  $\text{CDCl}_3$ )  $\delta$  5.87 (d,  $J$ =2.9 Hz, 1H), 5.84 (m, 1H), 3.69 (t,  $J$ =6.4 Hz, 2H), 2.67 (t,  $J$ =7.4 Hz, 2H), 2.25 (s, 3H), 1.92-1.85 (m, 2H), 1.48 (brs, 1H).

$^{13}\text{C}$  NMR (100 MHz,  $\text{CDCl}_3$ )  $\delta$  153.9, 150.6, 106.0, 105.8, 62.4, 31.4, 24.6, 13.7. **3-(5-Methylfuran-2-yl)propanal (46)**<sup>[1]</sup>

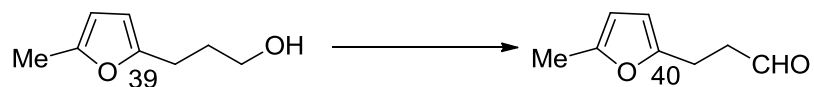

To a solution of DMSO (0.50 g, 0.46 mL, 6.43 mmol) in dry DCM (25 mL) was added  $\text{COCl}_2$  (1.90 mL, 3.79 mmol) at  $-78\text{ }^\circ\text{C}$  under nitrogen atmosphere and stirred for 15 min. After 15 min  $\text{NEt}_3$  was added and stirred for 30 min at  $-78\text{ }^\circ\text{C}$ . **39** (0.41 g, 2.92 mmol) in dry DCM (5 mL) was then added and then allowed to warm to  $-25\text{ }^\circ\text{C}$  over 1.5 h. The reaction mixture was then quenched with  $\text{H}_2\text{O}$  and concentrated in vacuo. The residue was extracted with EtOAc, dried over with  $\text{Na}_2\text{SO}_4$ , filtered, and then concentrated in vacuo. The residue was purified by radial chromatography (1:4 EtOAc/hexanes) to afford **40** (0.28 g, 70%,  $R_f=0.66$ , EtOAc/hexane, 1:4) as a yellow liquid.

IR (neat,  $\text{cm}^{-1}$ ) 2960, 2923, 2832, 2722, 1726, 1570, 1436, 1388, 1287.

$^1\text{H}$  NMR (400 MHz,  $\text{CDCl}_3$ )  $\delta$  9.80 (m, 1H), 5.87 (d,  $J=2.8$  Hz, 1H), 5.83 (m, 1H), 2.92 (t,  $J=7.2$  Hz, 2H), 2.75 (t,  $J=7.3$  Hz, 2H), 2.23 (s, 3H).

$^{13}\text{C}$  NMR (100 MHz,  $\text{CDCl}_3$ )  $\delta$  201.6, 152.1, 151.0, 106.3, 106.2, 42.2, 21.0, 13.7.

#### 1-(5-Methylfuran-2-yl)heptan-3-ol (**41**)

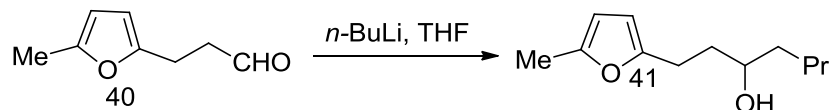

To a solution of **40** (0.61 g, 4.42 mmol) in dry THF (15 mL) was added  $n\text{-BuLi}$  (5.52 mL, 8.83 mmol, 1.6 M in hexanes) at  $-78\text{ }^\circ\text{C}$  under nitrogen atmosphere. The resulting mixture was stirred overnight while warming to rt. It was then quenched with saturated aqueous  $\text{NH}_4\text{Cl}$  solution and concentrated in vacuo. The residue was extracted with EtOAc, dried over with  $\text{Na}_2\text{SO}_4$ , filtered, and then concentrated in vacuo. The residue was purified by radial chromatography (1:4 EtOAc/hexanes) to afford **41** (0.50 g, 58%,  $R_f=0.5$ , EtOAc/hexanes, 1:4) as a light yellow liquid.

IR (neat,  $\text{cm}^{-1}$ ) 3360, 2931, 2859, 1617, 1571, 1454, 1375.

$^1\text{H}$  NMR (400 MHz,  $\text{CDCl}_3$ )  $\delta$  5.86 (d,  $J=2.9$  Hz, 1H), 5.83 (m, 1H), 3.63 (m, 1H), 2.80-2.60 (m, 2H), 2.24 (s, 3H), 1.86-1.76 (m, 1H), 1.75-1.64 (m, 1H), 1.59-1.22 (m, 6H), 0.90 (t,  $J=7.0$  Hz, 3H).

$^{13}\text{C}$  NMR (100 MHz,  $\text{CDCl}_3$ )  $\delta$  154.3, 150.6, 106.0, 105.7, 71.5, 37.4, 36.0, 28.0, 24.6, 23.0, 14.3, 13.7.

## 2-(3-Azidoheptyl)-5-methylfuran (9)

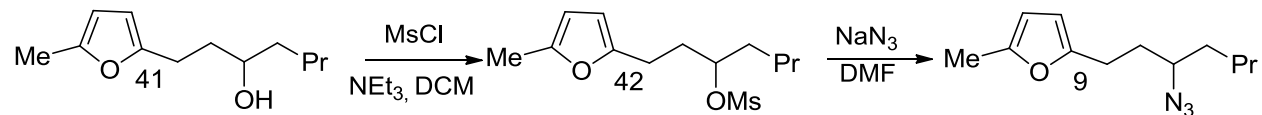

The general procedure for azidoalkylfurans from alcohols was employed with  $\text{DCM}$  (15 mL), **41** (0.23 g, 1.18 mmol),  $\text{MsCl}$  (0.11 mL, 1.42 mmol) and  $\text{NEt}_3$  (0.25 mL, 1.77 mmol) to afford crude **42** (0.32 g). It was used in the next step without purification.

$\text{DMF}$  (10 mL),  $\text{NaN}_3$  (0.3 g, 4.72 mmol) and the crude **42** (0.32 g). Purification by silica gel column chromatography afforded **9** (0.18 g, 70%,  $R_f=0.86$ ,  $\text{EtOAc}$ /hexanes, 1:4) as a yellow liquid.

IR (neat,  $\text{cm}^{-1}$ ) 2951, 2932, 2860, 2100, 1571, 1453, 1245.

$^1\text{H}$  NMR (400 MHz,  $\text{CDCl}_3$ )  $\delta$  5.89 (d,  $J=2.9$  Hz, 1H), 5.85 (m, 1H), 3.23 (m, 1H), 2.80-2.60 (m, 2H), 2.26 (s, 3H), 1.85 (m, 1H), 1.78 (m, 1H), 1.60-1.53 (m, 2H), 1.48-1.26 (m, 4H), 0.92 (t,  $J=7.1$  Hz, 3H).

$^{13}\text{C}$  NMR (100 MHz,  $\text{CDCl}_3$ )  $\delta$  153.2, 150.8, 106.1x2, 62.5, 34.4, 33.2, 28.4, 25.0, 22.8, 14.2, 13.7.

## Dimethyl 2-((5-methylfuran-2-yl)methyl)malonate (46)

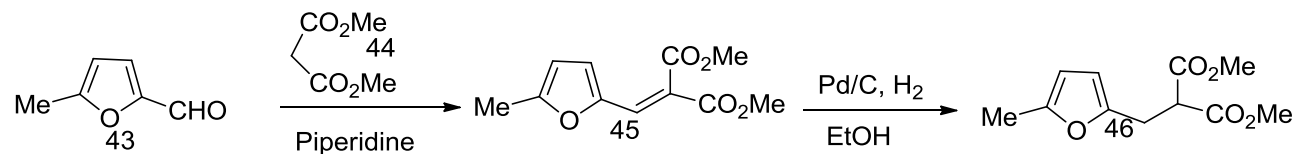

A solution of dimethyl malonate (1.98 g, 1.72 mL, 15.00 mmol) and piperidine (2.55 g, 2.97 mL, 29.97 mmol) in toluene (40 mL) was heated at 100 °C under nitrogen atmosphere and stirred for 1 h. After 1h, 5-methylfurfural (1.50 g, 1.35 mL, 13.62 mmol) was added and stirred for 15 h at the same temperature. The reaction mixture was then quenched with H<sub>2</sub>O and extracted with EtOAc, dried over with Na<sub>2</sub>SO<sub>4</sub>, filtered, and then concentrated in vacuo. The residue was purified by column chromatography (1:4 EtOAc/Hexanes) to afford **45** (2.57 g, 84%, *R*<sub>f</sub>=0.33, EtOAc/hexanes, 1:4) as a yellow liquid.

A mixture of **45** (2.48 g, 11.06 mmol) and 124 mg of Pd/C (5%) in EtOH (150 mL) with stirring was washed three times with hydrogen gas filled in a balloon. Then the reaction was maintained under hydrogen for 4.5 h. Pd/C was filtered off and the solvent was removed in vacuo. The residue was purified by column chromatography (1:4 EtOAc/Hexanes) to afford **46** (1.95 g, 78%, *R*<sub>f</sub>=0.80, EtOAc/hexanes, 1:4) as a colorless liquid.

IR (neat, cm<sup>-1</sup>) 3011, 2957, 2841, 1735, 1619, 1437, 1347, 1281, 1243, 1204, 1160.

<sup>1</sup>H NMR (400 MHz, CDCl<sub>3</sub>) δ 5.92 (d, *J*=3.0 Hz, 1H), 5.81 (m, 1H), 3.75-3.70 (m, 7H), 3.19 (d, *J*=7.7 Hz, 2H), 2.21 (s, 3H).

<sup>13</sup>C NMR (100 MHz, CDCl<sub>3</sub>) δ 169.2, 151.4, 149.8, 107.6, 106.3, 52.8, 51.2, 27.7, 13.7.

#### 2-((5-Methylfuran-2-yl)methyl)propane-1,3-diol (**47**)

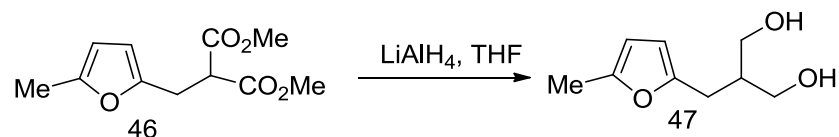

To a suspension of LAH (1.67 g, 44.00 mmol) in dry THF (80 mL) was added **46** (1.98 g, 8.75 mmol) in dry THF (10 mL) under argon atmosphere and heated to 70 °C for 10 h. The reaction mixture was then quenched with acetone and H<sub>2</sub>O. The solid material was filtered. The filtrate was extracted with EtOAc (2x30 mL) and washed with (2x20 mL). The combined organic layers were dried over with Na<sub>2</sub>SO<sub>4</sub>, filtered, and then concentrated in vacuo. The residue was purified by column chromatography (3:2 EtOAc/hexanes) to afford **47** (1.24 g, 83%, *R*<sub>f</sub>=0.45, EtOAc/hexanes, 3:2) as a yellow oil.

IR (neat, cm<sup>-1</sup>) 3340, 2922, 1569, 1433, 1260, 1213.



$^1\text{H}$  NMR (400 MHz,  $\text{CDCl}_3$ )  $\delta$  5.91 (d,  $J=2.8$  Hz, 1H), 5.85 (m, 1H), 3.81 (dd,  $J=10.8$  Hz,  $J=4.1$  Hz, 2H), 3.69 (dd,  $J=10.8$  Hz,  $J=6.6$  Hz, 2H), 2.62 (d,  $J=7.2$  Hz, 2H), 2.24 (s, 5H), 2.11 (m, 1H).

$^{13}\text{C}$  NMR (100 MHz,  $\text{CDCl}_3$ )  $\delta$  152.0, 151.0, 107.2, 106.2, 65.7, 41.9, 26.8, 13.8.

### 3-Iodo-2-((5-methylfuran-2-yl)methyl)propan-1-ol (**48**)

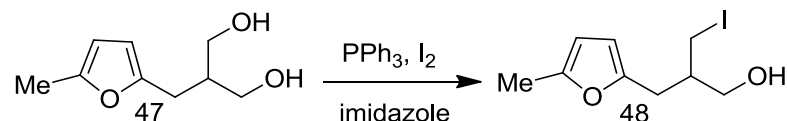

To a solution of **47** (300 mg, 1.70 mmol) in dry THF (15 mL) was added imidazole (130.92 mg, 1.92 mmol) and  $\text{PPh}_3$  (503.62 mg, 1.92 mmol) sequentially at 0 °C under nitrogen atmosphere and stirred for 1 min. The resulting mixture was treated immediately with iodine (633.51 mg, 2.49 mmol) and stirred for 18 h while warming to rt. The reaction mixture was quenched with saturated aqueous  $\text{Na}_2\text{S}_2\text{O}_3$  (10 mL) and extracted with EtOAc (2x20 mL). The combined organic layers were dried over with  $\text{Na}_2\text{SO}_4$ , filtered, and then concentrated in vacuo. The residue was purified by column chromatography (1:4 EtOAc/Hexanes) to afford the pure yellow liquid **48** (318 mg, 65%,  $R_f=0.49$ , EtOAc/hexanes, 1:4).

IR (neat,  $\text{cm}^{-1}$ ) 3328, 2943, 2920, 2876, 1568, 1428, 1342.

$^1\text{H}$  NMR (400 MHz,  $\text{CDCl}_3$ )  $\delta$  5.96 (d,  $J=2.8$  Hz, 1H), 5.85 (m, 1H), 3.68 (dd,  $J=11.0$  Hz,  $J=5.1$  Hz, 1H), 3.57 (dd,  $J=11.0$  Hz,  $J=6.5$  Hz, 1H), 3.36 (dd,  $J=9.9$  Hz,  $J=4.9$  Hz, 1H), 3.25 (dd,  $J=9.9$  Hz,  $J=5.5$  Hz, 1H), 2.68 (dd,  $J=15.1$  Hz,  $J=6.6$  Hz, 1H), 2.62 (dd,  $J=15.1$  Hz,  $J=7.3$  Hz, 1H), 2.24 (s, 3H), 1.86 (m, 1H), 1.67 (m, 1H).

### 13-Azido-2-((5-methylfuran-2-yl)methyl)propan-1-ol (**11**)

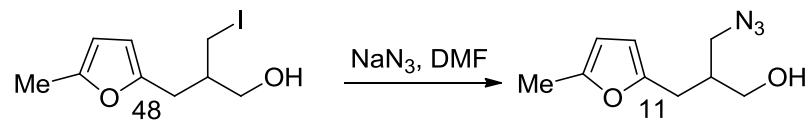

The general procedure for the preparation of azidoalkylfuran from alkylhalide was employed with DMF (5 mL), NaN<sub>3</sub> (70 mg, 1.08 mmol) and **48** (72.00 mg, 0.26 mmol). Purification by silica gel column chromatography afforded **11** (50 mg, 98%, *R*<sub>f</sub>=0.7, EtOAc/hexanes, 1:1) as a light yellow liquid.

IR (neat, cm<sup>-1</sup>) 3367, 2924, 2876, 2100, 1568, 1450, 1290.

<sup>1</sup>H NMR (400 MHz, CDCl<sub>3</sub>) δ 5.93 (d, *J*=2.9 Hz, 1H), 5.86 (m, 1H), 3.73-3.60 (m, 2H), 3.44 (dd, *J*=12.2 Hz, *J*=5.5 Hz, 1H), 3.39 (dd, *J*=12.2 Hz, *J*=6.4 Hz, 1H), 2.66 (d, *J*=7.0 Hz, 2H), 2.25 (s, 3H), 2.12 (m, 1H), 1.60 (brs, H).

<sup>13</sup>C NMR (100 MHz, CDCl<sub>3</sub>) δ 151.3, 151.2, 107.7, 106.2, 63.4, 52.5, 40.6, 27.6, 13.7.

#### Methyl 2-benzyl-3-(furan-2-yl)-3-oxopropanoate (**50**)

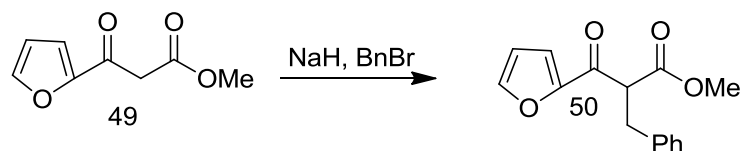

A suspension of **49**<sup>[2]</sup> (800 mg, 4.76 mmol) and NaH (171 mg, 7.14 mmol) in dry THF (20 mL) was stirred for 5 min at 0 °C under argon atmosphere. Then BnBr (896 mg, 0.62 mL, 5.24 mmol) was added and the reaction mixture was heated at 60 °C for 15 h. The reaction was then quenched with H<sub>2</sub>O (10 mL). It was extracted with EtOAc, dried over with Na<sub>2</sub>SO<sub>4</sub>, filtered and concentrated in vacuo. The residue was purified by silica gel column chromatography (1:4 EtOAc/Hexanes) to afford **50** (824 mg, 67%, *R*<sub>f</sub>=0.33, EtOAc/hexanes, 1:4) as a light yellow liquid.

IR (neat, cm<sup>-1</sup>) 3136, 3028, 2953, 2847, 1742, 1674, 1566, 1496, 1465, 1393.

<sup>1</sup>H NMR (400 MHz, CDCl<sub>3</sub>) δ 7.58 (dd, *J*=1.6 Hz, *J*=0.7 Hz, 1H), 7.28-7.15 (m, 6H), 6.52 (dd, *J*=3.6 Hz, *J*=1.7 Hz, 1H), 4.44 (t, *J*=7.5 Hz, 1H), 3.66 (s, 3H), 3.31 (d, *J*=7.6 Hz, 2H).

$^{13}\text{C}$  NMR (100 MHz,  $\text{CDCl}_3$ )  $\delta$  183.3, 169.6, 152.1, 147.4, 138.4, 129.2, 128.7, 126.9, 119.1, 112.9, 56.2, 52.8, 34.6.

**Methyl 2-benzyl-3-(furan-2-yl)propanoate (**54**)**

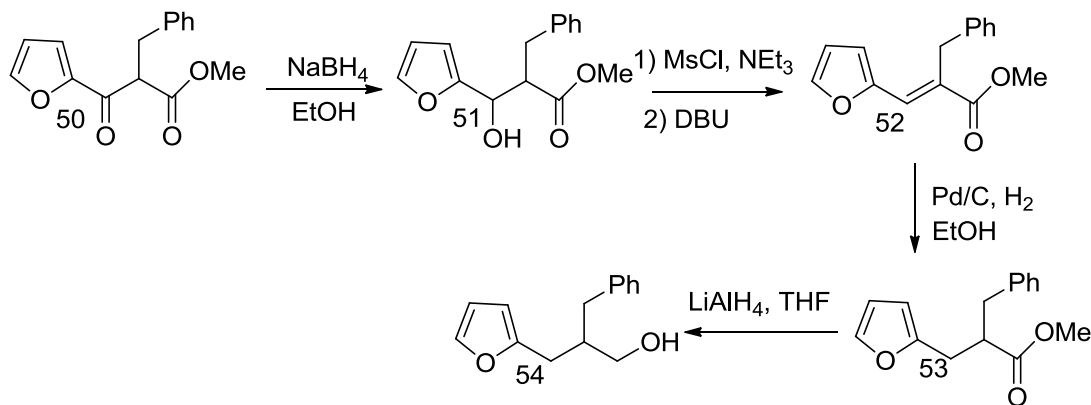

To a solution of **50** (550 mg, 2.13 mmol) in EtOH (15 mL) was added  $\text{NaBH}_4$  (80.6 mg, 2.13 mmol) at  $-78\text{ }^\circ\text{C}$  and stirred for 5 h. The reaction mixture was then quenched with saturated aqueous  $\text{NH}_4\text{Cl}$  solution. The solid material was filtrated. The filtrate was concentrated in vacuo. The residue was diluted with DCM (2x15 mL) and washed with  $\text{H}_2\text{O}$  (8 mL). The organic layer was separated, dried over with  $\text{Na}_2\text{SO}_4$ , filtered, and then concentrated in vacuo to afford the crude **51** (330 mg). It was used in the next step without further purification.

To a solution of the crude **51** (330 mg) in dry DCM (20 mL) was added  $\text{MsCl}$  (174.6 mg, 0.12 mL, 1.52 mmol) and  $\text{NEt}_3$  (1.30 g 1.77 mL, 12.7 mmol) at  $0\text{ }^\circ\text{C}$  under nitrogen atmosphere. The reaction was stirred for 15 h while warming to rt. DBU was then added and stirred for 15 h. The reaction mixture was quenched with  $\text{H}_2\text{O}$  (10 mL) and extracted with DCM (2x20 mL). The organic layer was dried over with  $\text{Na}_2\text{SO}_4$ , filtered and concentrated in vacuo. The residue was purified by column chromatography (1:4 EtOAc/Hexanes) to afford **52** (228 mg, 74%,  $R_f=0.66$ , EtOAc/hexanes, 1:4) as a yellow liquid.

A mixture of **52** (300 mg, 1.24 mmol) and 30 mg of Pd/C (10%) in EtOH (40 mL) with stirring was washed three times with hydrogen gas filled in a balloon. Then the reaction was maintained under hydrogen for 5 h. Pd/C was filtered off and the solvent was removed in vacuo. The residue was purified by column chromatography to yield **53** (250 mg, 83%,  $R_f=0.7$ , EtOAc/hexanes, 1:4) as a colorless liquid.

IR (neat,  $\text{cm}^{-1}$ ) 3024, 2955, 2913, 1737, 1604, 1506, 1429, 1366, 1261.

$^1\text{H}$  NMR (400 MHz,  $\text{CDCl}_3$ )  $\delta$  7.34-7.10 (m, 6H), 6.27 (dd,  $J=3.0$  Hz,  $J=1.9$  Hz, 1H), 6.03 (d,  $J=2.7$  Hz, 1H), 3.58 (s, 3H), 3.10-2.94 (m, 3H), 2.87-2.77 (m, 2H).

$^{13}\text{C}$  NMR (100 MHz,  $\text{CDCl}_3$ )  $\delta$  175.2, 153.1, 141.6, 139.0, 129.1, 128.6, 126.7, 110.4, 106.7, 51.8, 46.8, 38.0, 30.3.

To a suspension of LAH (172.30 mg) in dry THF (20 mL) was added **53** (177 mg, 1.13 mmol) in 3 mL of THF under argon atmosphere at 0 °C and stirred for 10 h while warming to rt. The reaction mixture was then quenched with acetone (15 mL) and  $\text{H}_2\text{O}$  (8 mL). The residue was filtered and concentrated under vacuo. The filtrate was extracted with EtOAc (2x20 mL) and washed with  $\text{H}_2\text{O}$  (2x10 mL). The combined layers were dried over with  $\text{Na}_2\text{SO}_4$ , filtered and concentrated in vacuo. The residue was purified by column chromatography (1:4 EtOAc/Hexanes) to afford **54** (142 mg, 58%,  $R_f=0.3$ , EtOAc/hexanes, 1:4) as a colorless liquid.

IR (neat,  $\text{cm}^{-1}$ ) 3359, 3085, 3062, 3027, 2925, 1599, 1507, 1496, 1454, 1383, 1358, 1148, 1060, 1028, 1007.

$^1\text{H}$  NMR (400 MHz,  $\text{CDCl}_3$ )  $\delta$  7.31-7.25 (m, 3H), 7.19-7.16 (m, 3H), 6.28 (dd,  $J=3.1$  Hz,  $J=1.9$  Hz, 1H), 6.03 (dd,  $J=3.1$  Hz,  $J=0.6$  Hz, 1H), 3.48 (dd,  $J=10.9$  Hz,  $J=5.2$  Hz, 2H), 2.74-2.59 (m, 4H), 2.20 (m, 1H), 1.83 (brs, 1H).

$^{13}\text{C}$  NMR (100 MHz,  $\text{CDCl}_3$ )  $\delta$  154.4, 141.2, 140.3, 129.2, 128.4, 126.1, 110.3, 106.6, 64.2, 42.2, 37.2, 29.3.

## 2-(3-Azido-2-benzylpropyl)furan (13)

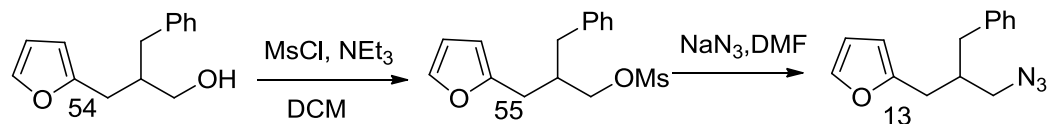

The general procedure for the mesylation of alcohols was employed with DCM (20 mL), **54** (142 mg, 0.66 mmol), MsCl (1.06 mL, 0.74 mmol) and NEt<sub>3</sub> (0.14 mL, 1.01 mmol) to afford crude **55** (197 mg). It was used in the next step without purification.

The general procedure for the preparation of azidoalkylfuran from alcohols was employed with DMF (10 mL), NaN<sub>3</sub> (174 mg, 2.68 mmol) and the crude **55** (197 mg). Purification by silica gel column chromatography afforded **13** (116 mg, 73%,  $R_f$ =0.83, EtOAc/hexanes, 1:4) as a light yellow liquid.

IR (neat, cm<sup>-1</sup>) 3028, 2925, 2857, 2099, 1600, 1506, 1452, 1351, 1289.

<sup>1</sup>H NMR (400 MHz, CDCl<sub>3</sub>)  $\delta$  7.35-7.15 (m, 6H), 6.30 (dd,  $J$ =3.2 Hz,  $J$ =1.9 Hz, 1H), 6.07 (dd,  $J$ =3.2 Hz,  $J$ =0.6 Hz, 1H), 3.22 (d,  $J$ =5.3 Hz, 2H), 2.70 (d,  $J$ =6.8 Hz, 2H), 2.66 (d,  $J$ =7.3 Hz, 2H), 2.25 (m, 1H).

<sup>13</sup>C NMR (100 MHz, CDCl<sub>3</sub>)  $\delta$  153.4, 141.4, 139.4, 129.2, 128.5, 126.3, 110.2, 107.0, 53.5, 40.0, 37.8, 30.0.

### 3-(*tert*-Butyldimethylsilyloxy)-1-(5-methylfuran-2-yl)propan-1-ol (**57**)

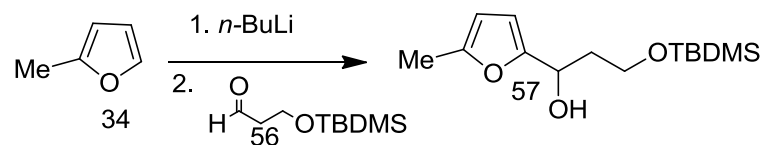

The general procedure for the preparation of alkylfurans with dry THF (60 mL), 3-(*tert*-butyldimethylsilyloxy)propanal (**56**)<sup>3</sup>, (2.39 g, 12.69 mmol) 2-methylfuran (1.38 mL, 15.27 mmol) and *n*-BuLi (11.27 mL, 18.04 mmol, 1.6 M in hexanes). Purification by silica gel column chromatography afforded **57** (2.5 g, 73%,  $R_f$ =0.59, EtOAc/hexanes, 1:4) as a yellow liquid.

IR (neat, cm<sup>-1</sup>) 3428, 3071, 2931, 2858, 1582, 1472, 1427, 1390.

$^1\text{H}$  NMR (400 MHz,  $\text{CDCl}_3$ )  $\delta$  6.11 (d,  $J$  = 3.0 Hz, 1 H), 5.89 (m, 1H), 4.88 (dd,  $J$  = 8.2 Hz,  $J$  = 3.7 Hz, 1 H), 3.89 (m, 1H), 3.82 (m, 1H), 3.44 (brs, 1H), 2.27 (s, 3H), 2.12-1.96 (m, 2H), 0.90 (s, 9H), 0.08 (s, 6H).

$^{13}\text{C}$  NMR (100 MHz,  $\text{CDCl}_3$ )  $\delta$  155.0, 151.6, 106.6, 106.1, 67.6, 61.9, 37.4, 26.1, 18.4, 13.7, 2x-5.3.

**(3-(Benzyloxy)-3-(5-methylfuran-2-yl)propoxy)(tert-butyl)dimethylsilane (58)**

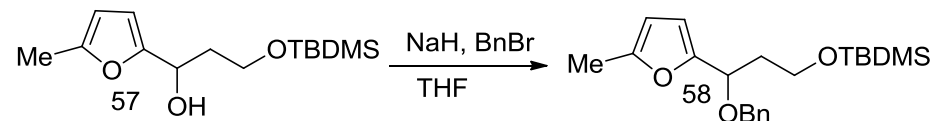

The general procedure for the benzyl protection of alcohols was employed with dry THF (60 mL), **57** (7.00 g, 25.88 mmol), NaH (1.24 g, 51.82 mmol) and BnBr (3.70 mL, 31.09 mmol). Purification by silica gel column chromatography afforded **58** (8.40 g, 90%,  $R_f$ =0.73, EtOAc/hexanes, 1:9) as a colorless liquid.

IR (neat,  $\text{cm}^{-1}$ ) 3457, 3089, 3065, 3031, 2954, 2928, 2857, 1562, 1496, 1455.

$^1\text{H}$  NMR (400 MHz,  $\text{CDCl}_3$ )  $\delta$  7.43-7.26 (m, 5H), 6.19 (d,  $J$  = 3.01 Hz, 1 H), 5.95 (d,  $J$  = 2.8 Hz, 1 H), 4.60-4.50 (m, 2H), 4.40 (d,  $J$  = 11.8 Hz, 1H), 3.79 (m, 1H), 3.65 (m, 1H), 2.32 (s, 3H), 2.22 (m, 1H), 2.05 (m, 1H), 0.91 (s, 9H), 0.05 (s, 6H).

$^{13}\text{C}$  NMR (100 MHz,  $\text{CDCl}_3$ )  $\delta$  152.8, 152.2, 138.9, 138.0, 129.2, 129.0, 128.6, 128.5, 128.0, 127.6, 109.3, 106.1, 71.2, 70.5, 59.7, 37.6, 26.2, 18.5, 13.8, -5.1.

**3-(Benzyloxy)-3-(5-methylfuran-2-yl)propan-1-ol (59)**

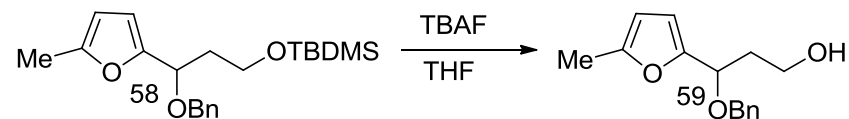

To a solution of **58** (8.10 g, 22.46 mmol) in dry THF (80 mL) was added TBAF (33.73 mL, 33.73 mmol, 1 M in THF) at 0 °C under nitrogen atmosphere and allowed to warm to rt overnight. The reaction was quenched with H<sub>2</sub>O (20 mL) and concentrated in vacuo and extracted with EtOAc (2x30 mL). The combined organic layer was dried over Na<sub>2</sub>SO<sub>4</sub>, filtered and concentrated in vacuo. The residue was purified by silica gel column chromatography (1:4 EtOAc/Hexanes) to afford **59** (5.42 g, 98%, *R*<sub>f</sub>=0.3, EtOAc/hexanes, 1:4) as a yellow liquid.

IR (neat, cm<sup>-1</sup>) 3410, 3064, 3031, 2924, 2875, 1562, 1497, 1454, 1389.

<sup>1</sup>H NMR (400 MHz, CDCl<sub>3</sub>) δ 7.36-7.25 (m, 5H), 6.20 (d, *J* = 3.0 Hz, 1 H), 5.94 (m, 1H), 4.57-4.53 (m, 2H), 4.36 (d, *J*=11.8 Hz, 1 H), 3.80 (m, 1H), 3.72 (m, 1H), 2.43 (brs, 1H), 2.31 (s, 3 H), 2.25 (m, 1H), 1.99 (m, 1H).

<sup>13</sup>C NMR (100 MHz, CDCl<sub>3</sub>) δ 152.5, 152.1, 138.3, 128.6, 128.1, 127.9, 109.4, 106.2, 73.1, 70.6, 60.7, 37.0, 13.8.

## 2-(3-Azido-1-(benzyloxy)propyl)-5-methylfuran (**15**)

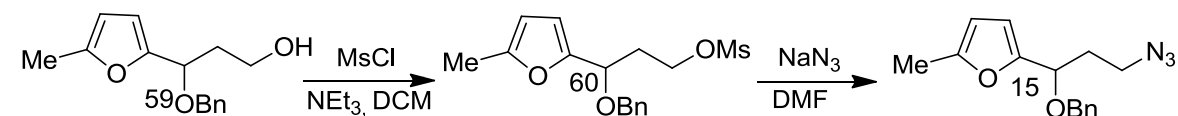

The general procedure for azidoalkylfurans from alcohols was employed with DCM (20 mL), **59** (1.12 g, 4.55 mmol), MsCl (0.39 mL, 5.00 mmol) and NEt<sub>3</sub> (0.76 mL, 5.46 mmol) to afford crude **60** (1.74 g). It was used in the next step without further purification.

DMF (20 mL), NaN<sub>3</sub> (1.18 g, 18.20 mmol) and the crude **60** (1.74 g). Purification by silica gel column chromatography afforded **15** (1.10 g, 89%, *R*<sub>f</sub>=0.65, EtOAc/hexanes, 1:9) as a light yellow liquid.

IR (neat, cm<sup>-1</sup>) 3031, 2926, 2865, 2097, 1740, 1562, 1496, 1453, 1353.

<sup>1</sup>H NMR (400 MHz, CDCl<sub>3</sub>) δ 7.37-7.26 (m, 5H), 6.20 (d, *J* = 3.0 Hz, 1 H), 5.94 (m, 1H), 4.54 (d, *J* = 11.8 Hz, 1 H), 4.42 (dd, *J* = 8.5 Hz, *J* = 5.4 Hz, 1 H), 4.34 (d, *J* = 11.8 Hz, 1 H), 3.45 (dt, *J* = 12.4 Hz, *J* = 6.7 Hz, 1 H), 3.36 (dt, *J* = 12.4 Hz, *J* = 6.5 Hz, 1H), 2.31 (s, 3H), 2.24 (m, 1H), 2.02 (m, 1H).

$^{13}\text{C}$  NMR (100 MHz,  $\text{CDCl}_3$ )  $\delta$  152.6, 151.6, 138.4, 128.6, 128.1, 127.8, 109.8, 106.2, 71.3, 70.5, 48.3, 33.9, 13.8. **3-(4,5-Dimethylfuran-2-yl)propan-1-ol (69)**

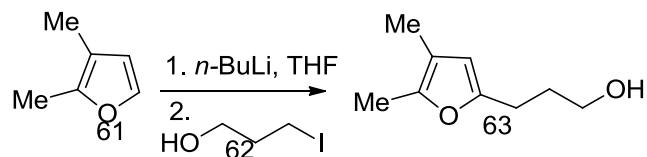

The general procedure for the preparation of alkylfurans with dry THF (30 mL), 3-iodo-1-propanol (845 mg, 4.54 mmol), 2,3-dimethylfuran (916 mg, 1.00 mL, 9.53 mmol) and *n*-BuLi (4.00 mL, 9.98 mmol, 2.5 M in hexanes). Purification by silica gel column chromatography afforded **63** (327 mg, 47%,  $R_f=0.2$ , EtOAc/hexanes, 1:4) as a yellow liquid.

IR (neat,  $\text{cm}^{-1}$ ) 3390, 2924, 2872, 1712, 1576, 1451, 1260.

$^1\text{H}$  NMR (400 MHz,  $\text{CDCl}_3$ )  $\delta$  5.78 (s, 1H), 3.68 (t,  $J=6.3$  Hz, 2H), 2.63 (t,  $J=7.4$  Hz, 2H), 2.15 (s, 3H), 1.89 (s, 3H), 1.85 (dd,  $J=13.9$  Hz,  $J=6.6$  Hz, 2H).

$^{13}\text{C}$  NMR (100 MHz,  $\text{CDCl}_3$ )  $\delta$  152.4, 145.5, 114.2, 108.3, 62.2, 31.2, 24.3, 11.2, 9.9.

### **5-(3-Azidopropyl)-2,3-dimethylfuran (17)**

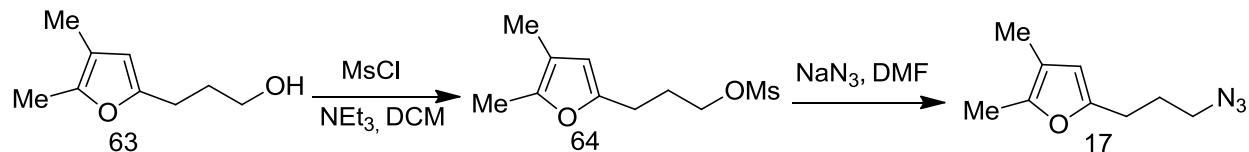

The general procedure for azidoalkylfurans from alcohols was employed with DCM (15 mL), **63** (256 mg, 1.66 mmol), MsCl (0.15 mL, 2.00 mmol) and  $\text{NEt}_3$  (0.35 mL, 2.5 mmol). Purification by silica gel column chromatography afforded crude **64** (385 mg, 1.66 mmol). It was used in the next step without further purification.



DMF (5 mL), NaN<sub>3</sub> (432 mg, 6.64 mmol) and the crude **64** (385 mg, 1.66 mmol). Purification by silica gel column chromatography afforded **17** (196 mg, 66%,  $R_f$ =0.83, EtOAc/hexanes, 1:9) as a light yellow liquid.

IR (neat, cm<sup>-1</sup>) 2945, 2925, 2859, 2098, 1642, 1579, 1450, 1261.

<sup>1</sup>H NMR (400 MHz, CDCl<sub>3</sub>)  $\delta$  5.79 (s, 1H), 3.31 (t,  $J$ =6.8 Hz, 2H), 2.63 (t,  $J$ =6.8 Hz, 2H), 2.16 (s, 3H), 1.95-1.83 (m, 5H).

<sup>13</sup>C NMR (100 MHz, CDCl<sub>3</sub>)  $\delta$  151.5, 146.0, 114.5, 109.0, 50.9, 27.8, 25.2, 11.5, 10.1.

### 2-(4-Chlorobutyl)-5-methylfuran (**66**)

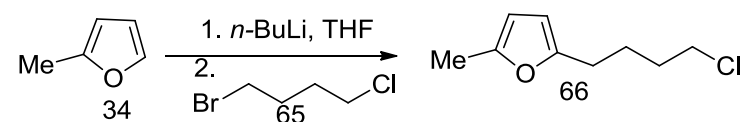

The general procedure for the preparation of alkylfurans with dry THF (40 mL), 1-chloro-4-iodopentane (3.04 g, 17.73 mmol), 2-dimethylfuran (1.76 mL, 19.50 mmol) and *n*-BuLi (14.40 mL, 23.04 mmol, 1.6 M in hexanes). Purification by silica gel column chromatography afforded **66** (2.5 g, 82%,  $R_f$ =0.33, in hexanes) as a yellow liquid.

IR (neat, cm<sup>-1</sup>) 3473, 2947, 2921, 2866, 1773, 1685, 1618, 1569, 1449.

<sup>1</sup>H NMR (400 MHz, CDCl<sub>3</sub>)  $\delta$  5.88-5.84 (m, 2H), 3.55 (t,  $J$ =6.4 Hz, 2H), 2.61 (t,  $J$ =7.0 Hz, 2H), 2.26 (s, 3H), 1.88-1.74 (m, 4H).

<sup>13</sup>C NMR (100 MHz, CDCl<sub>3</sub>)  $\delta$  153.8, 150.6, 106.0, 105.9, 45.0, 32.2, 27.5, 25.7, 13.7.

### 2-(4-Azidobutyl)-5-methylfuran (**19**)

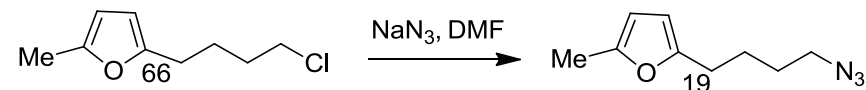

The general procedure for the preparation of azidoalkylfuran from alkylhalide was employed with DMF (20 mL), NaN<sub>3</sub> (3.62 g, 55.80 mmol) and **66** (2.40 g, 13.90 mmol). Purification by silica gel column chromatography afforded **19** (2.3 g, 92%, *R*<sub>f</sub>=0.82, EtOAc/hexanes, 1:9) as a light yellow liquid.

IR (neat, cm<sup>-1</sup>) 3105, 2944, 2867, 2100, 1617, 1570, 1454, 1352.

<sup>1</sup>H NMR (400 MHz, CDCl<sub>3</sub>) δ 5.88-5.85 (m, 2H), 3.29 (t, *J*=6.6 Hz, 2H), 2.62 (t, *J*=7.1 Hz, 2H), 2.27 (s, 3H), 1.80-1.62 (m, 4H).

<sup>13</sup>C NMR (100 MHz, CDCl<sub>3</sub>) δ 153.8, 150.5, 106.0, 105.9, 51.4, 28.5, 27.7, 25.6, 13.6.

#### 2,2-Dimethyl-4-(2-(5-methylfuran-2-yl)ethyl)-1,3-dioxolane (**68**)

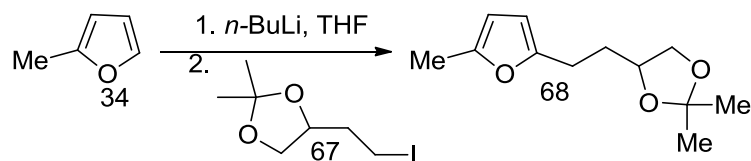

The general procedure for the preparation of alkylfurans with dry THF (40 mL), 4-(2-iodoethyl)-2,2-dimethyl-1,3-dioxolane (**67**)<sup>4</sup> (2.60 g, 10.15 mmol), 2-methylfuran (1.67 g, 12.7 mL, 20.31 mmol) and *n*-BuLi (12.69 mL, 20.31 mmol, 1.6 M in hexanes). Purification by silica gel column chromatography afforded **68** (1.76 g, 82%, *R*<sub>f</sub>=0.6, EtOAc/hexanes, 1:9) as a yellow liquid.

IR (neat, cm<sup>-1</sup>) 2985, 2937, 2873, 1571, 1455, 1378, 1370, 1218, 1155, 1109, 1068, 1021.

<sup>1</sup>H NMR (400 MHz, CDCl<sub>3</sub>) δ 5.87 (d, *J*=2.8 Hz, 1H), 5.84 (m, 1H), 4.11 (m, 1H), 4.01 (dd, *J*=7.9 Hz, *J*=6.0 Hz, 1H), 3.52 (t, *J*=7.3 Hz, 1H), 2.75-2.58 (m, 2H), 2.24 (s, 3H), 1.99-1.79 (m, 2H), 1.40 (s, 3H), 1.35 (s, 3H).

$^{13}\text{C}$  NMR (100 MHz,  $\text{CDCl}_3$ )  $\delta$  153.5, 150.7, 109.0, 106.0, 105.9, 75.5, 69.4, 32.4, 27.2, 25.9, 24.6, 13.7.

#### 4-(5-Methylfuran-2-yl)butane-1,2-diol (**69**)

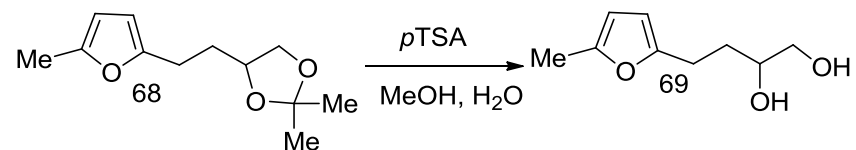

To a solution of **68** (1.76 g, 8.37 mmol) in  $\text{MeOH}:\text{H}_2\text{O}$  (60 mL:10 mL) was added *p*TSA (176 mg) and stirred for 20 h at rt. It was concentrated in vacuo and extracted with EtOAc (2x30 mL) and washed with  $\text{H}_2\text{O}$  (15 mL). The combined layer was dried over with  $\text{Na}_2\text{SO}_4$ , filtered and concentrated in vacuo. The residue was purified by column chromatography to afford **69** (1.30 g, 91%,  $R_f=0.2$ , EtOAc/hexanes 3:2) as a yellow liquid.

IR (neat,  $\text{cm}^{-1}$ ) 3369, 2923, 1571, 1451, 1219, 1092, 1045, 1021.

$^1\text{H}$  NMR (400 MHz,  $\text{CDCl}_3$ )  $\delta$  5.58 (d,  $J=2.9$  Hz, 1H), 5.84 (m, 1H), 3.75 (m, 1H), 3.65 (dd,  $J=11.1$  Hz,  $J=3.1$  Hz, 1H), 3.47 (dd,  $J=11.1$  Hz,  $J=7.6$  Hz, 1H), 2.80-2.63 (m, 2H), 2.24 (s, 3H), 1.80-1.70 (m, 2H).

$^{13}\text{C}$  NMR (100 MHz,  $\text{CDCl}_3$ )  $\delta$  153.7, 150.8, 106.1, 106.0, 71.7, 66.9, 31.8, 24.4, 13.7.

#### 1-Azido-4-(5-methylfuran-2-yl)butan-2-ol (**71**)

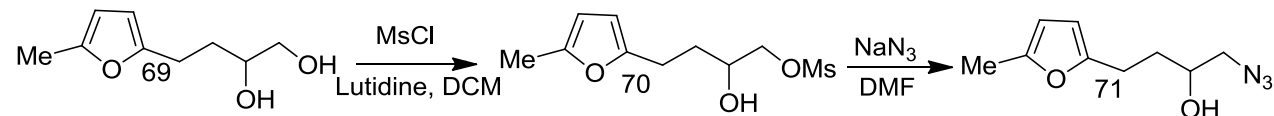

The general procedure for azidoalkylfurans from alcohols was employed with DCM (60 mL), **69** (1.2 g, 7.05 mmol), MsCl (0.89 g, 0.60 mL, 7.76 mmol) and lutidine (7.56 g, 8.20 mL, 70.55 mmol). Purification by silica gel column chromatography afforded crude **70** (1.75 g). It was used in the next step without further purification.

DMF (20 mL), NaN<sub>3</sub> (2.30 g, 35.2 mmol) and the crude **70** (1.75 g). Purification by column chromatography afforded **71** (1.10 g, 80%, *R*<sub>f</sub>=0.46, EtOAc/hexanes, 1:4) as a light yellow liquid.

IR (neat, cm<sup>-1</sup>) 3670, 2918, 2852, 2102, 1445, 1284, 1213, 1073, 1021.

<sup>1</sup>H NMR (400 MHz, CDCl<sub>3</sub>) δ 5.88 (d, *J*=2.9, 1H), 5.84 (m, 1H), 3.80 (m, 1H), 3.37 (dd, *J*=12.4, *J*=3.4, 1H), 3.27 (dd, *J*=12.4, *J*=7.3, 1H), 2.79-2.65 (m, 2H), 2.25 (s, 3H), 1.85-1.75 (m, 2H).

<sup>13</sup>C NMR (100 MHz, CDCl<sub>3</sub>) δ 153.2, 150.9, 106.2, 106.1, 70.3, 57.2, 32.9, 24.3, 13.7.

#### 2-(4-Azido-3-(benzyloxy)butyl)-5-methylfuran (**21**)

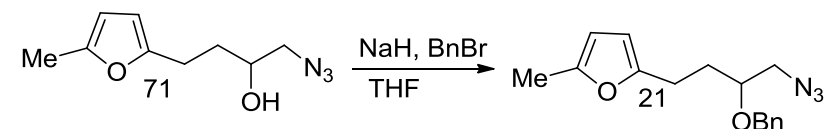

The general procedure for the benzyl protection of alcohols was employed with dry THF (35 mL), **71** (768 mg, 3.94 mmol), NaH (189.05 mg, 7.88 mmol) and BnBr (0.61 mL, 5.12 mmol). Purification by silica gel column chromatography afforded **21** (1.02 g, 91%, *R*<sub>f</sub>=0.66, EtOAc/hexanes, 1:9) as a yellow liquid.

IR (neat, cm<sup>-1</sup>) 3027, 2928, 2863, 2100, 1566, 1492, 1454, 1344, 1281, 1218, 1089, 1021.

<sup>1</sup>H NMR (400 MHz, CDCl<sub>3</sub>) δ 7.41-7.27 (m, 5H), 5.85-5.82 (m, 2H), 4.66 (d, *J*=11.4 Hz, 1H), 4.57 (d, *J*=11.4 Hz, 1H), 3.60 (m, 1H), 3.77 (dd, *J*=12.9 Hz, *J*=4.1 Hz, 1H), 3.30 (dd, *J*=12.9 Hz, *J*=5.9 Hz, 1H), 2.74-2.61 (m, 2H), 2.25 (s, 3H), 2.00-1.82 (m, 2H).

$^{13}\text{C}$  NMR (100 MHz,  $\text{CDCl}_3$ )  $\delta$  153.4, 150.7, 138.2, 128.7, 128.2, 128.0, 106.1, 106.0, 77.5, 72.3, 54.2, 31.0, 24.0, 13.7. **2-(5-Chloropropyl)-5-methylfuran (73)**

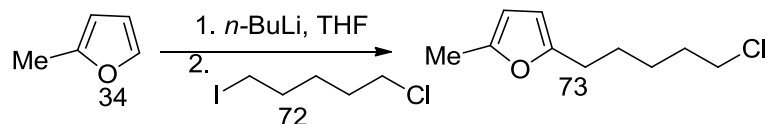

The general procedure for the preparation of alkylfurans with dry THF (40 mL), 1-chloro-5-iodopentane (**72**) (2.50 g, 1.50 mL, 10.75 mmol), 2-methylfuran (0.97 g, 1.07 mL, 11.81 mmol) and *n*-BuLi (8.73 mL, 14.0 mmol, 1.6 M in hexanes). Purification by silica gel column chromatography afforded **73** (1.67 g, 83%,  $R_f$ =0.89, EtOAc/hexanes, 1:9) as a yellow liquid.

IR (neat,  $\text{cm}^{-1}$ ) 3101, 2939, 2862, 1681, 1618, 1570, 1453.

$^1\text{H}$  NMR (400 MHz,  $\text{CDCl}_3$ )  $\delta$  5.86-5.84 (m, 2H), 3.54 (t,  $J$ =6.7 Hz, 2H), 2.59 (t,  $J$ =7.5 Hz, 2H), 2.26 (s, 3H), 1.84-1.77 (m, 2H), 1.70-1.60 (m, 2H), 1.54-1.45 (m, 2H).

$^{13}\text{C}$  NMR (100 MHz,  $\text{CDCl}_3$ )  $\delta$  154.3, 150.4, 106.0, 105.6, 45.2, 32.6, 28.1, 27.7, 26.6, 13.7.

### 2-(5-Azidopropyl)-5-methylfuran (**23**)

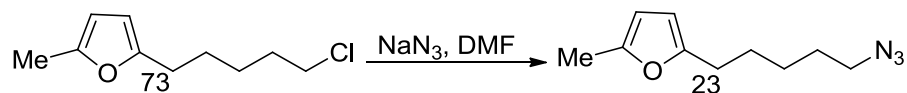

The general procedure for the preparation of azidoalkylfuran from alkylhalide was employed with DMF (25 mL),  $\text{NaN}_3$  (2.18 g, 33.5 mmol) and **73** (1.56 g, 8.36 mmol). Purification by silica gel column chromatography afforded **23** (1.60 g, 99%,  $R_f$ =0.77, EtOAc/hexanes, 5:95) as a light yellow liquid.

IR (neat,  $\text{cm}^{-1}$ ) 3327, 3104, 2937, 2862, 2516, 2098, 1618, 1570, 1454, 1351.

$^1\text{H}$  NMR (400 MHz,  $\text{CDCl}_3$ )  $\delta$  5.86-5.83 (m, 2H), 3.27 (t,  $J=6.9$  Hz, 2H), 2.58 (t,  $J=7.5$  Hz, 2H), 2.25 (s, 3H), 1.70-1.59 (m, 4H), 1.47-1.38 (m, 2H).

$^{13}\text{C}$  NMR (100 MHz,  $\text{CDCl}_3$ )  $\delta$  154.3, 150.4, 106.0, 105.6, 51.6, 28.8, 28.1, 27.9, 26.5, 13.7.

## 2e. General procedures for photooxygenation

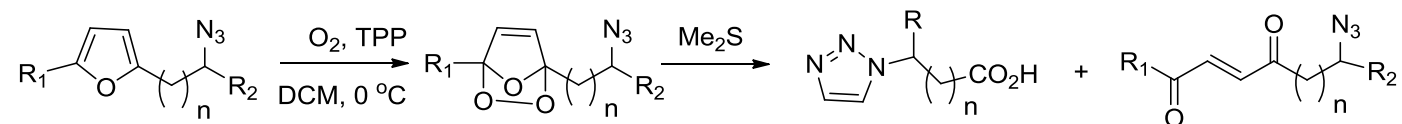

A solution of 3-azidoalkylfuran (**9**) (1 equiv) in DCM (10 mL) was illuminated at 0 °C with a halogen lamp (500 Watt) in the presence of TPP (ca.) while oxygen was bubbled through the solution. The reaction was kept at the same temperature during the reaction. The reaction was monitored by TLC. Upon the consumption of the starting material, the reaction was treated with  $\text{Me}_2\text{S}$  (10 equiv) at 0 °C or  $-78$  °C and allowed to warm to rt overnight. After removal of the solvent, the residue was triturated with DCM/hexanes to obtain the corresponding triazole.

## Photooxygenation of **1**

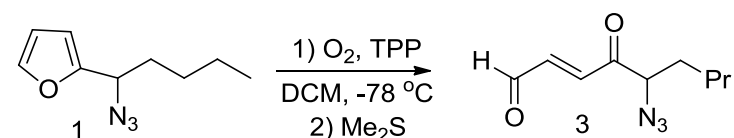

The general procedure was employed with **1** (100 mg, 0.56 mmol), TPP (ca.), DCM,  $\text{O}_2$  at  $-78$  °C. The solvent was evaporated. The crude product was 176 mg as a light brown liquid.

$^1\text{H}$  NMR (400 MHz,  $\text{CDCl}_3$ )  $\delta$  9.80 (d,  $J=7.30$  Hz, 1H), 7.14 (d,  $J=16.0$  Hz, 1H), 6.91 (dd,  $J=16.0, 7.30$  Hz, 1H), 4.08 (dd,  $J=8.35, 5.30$  Hz, 1H), 1.85-1.74 (m, 2H), 1.39-1.23 (m, 4H), 0.92 (t,  $J=7.1$ , 3H).

$^{13}\text{C}$  NMR (100 MHz,  $\text{CDCl}_3$ )  $\delta$  190.0, 192.5, 140.4, 139.3, 67.7, 30.6, 28.0, 22.5, 14.0.

### Photooxygenation of 4

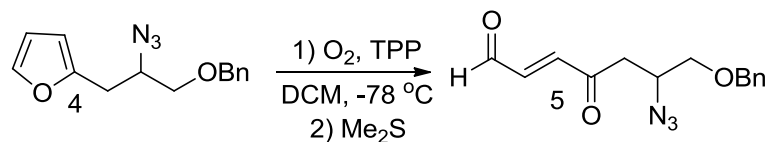

The general procedure was employed with DCM, **4** (154 mg, 0.60 mmol), TPP (ca.) and Me<sub>2</sub>S (0.85 mL, 11.57 mmol). <sup>1</sup>H NMR from the crude material showed same characteristic signals belonged to **5**. It was very unstable at rt and on usual chromatography adsorbents for full characterization.

<sup>1</sup>H NMR (400 MHz, CDCl<sub>3</sub>) δ 9.74 (d, *J*=7.1 Hz, 1H), 7.35-7.25 (m, 5H), 7.35-7.20 (m, 5H), 6.85 (d, *J*=16.1 Hz, 1H), 6.77 (dd, *J*=16.1, *J*=7.1 Hz, 1H), 4.58-4.51 (m, 2 H), 4.14 (m, 1H), 3.58-3.56 (d, *J*=5.5 Hz, 2H), 2.89 (m, 1H).

### Photooxygenation of 6

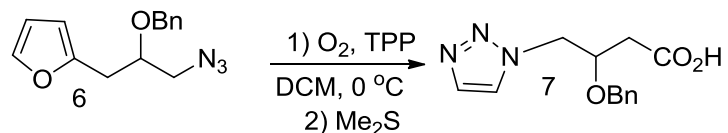

The general procedure was employed with DCM, **6** (232 mg, 0.90 mmol), TPP (ca.) and Me<sub>2</sub>S (0.66 mL, 9.02 mmol). Trituration provided **7** (207 mg, 88%) as a white solid. Mp 90.5- 91.5 °C.

IR (neat, cm<sup>-1</sup>) 3137, 3031, 2919, 2560, 1720, 1496, 1452, 1401, 1351, 1251, 1284, 1205, 1075;

<sup>1</sup>H NMR (400 MHz, CDCl<sub>3</sub>) δ 11.13 (brs, 1H), 7.72 (s, 1H), 7.65 (s, 1H), 7.35-7.20 (m, 5H), 4.66 (dd, *J*=14.2 Hz, *J*=3.8 Hz, 1H), 4.60 (d, *J*=11.3 Hz, 1H), 4.57 (dd, *J*=14.2 Hz, *J*=6.4 Hz, 1H), 4.38 (d, *J*=11.3 Hz, 1H), 4.29 (m, 1H), 2.63 (dd, *J*=15.0 Hz, *J*=4.6 Hz, 1H), 2.58 (dd, *J*=15.0 Hz, *J*=4.4 Hz, 1H).

<sup>13</sup>C NMR (100 MHz, CDCl<sub>3</sub>) δ 174.5, 137.3, 133.6, 128.8, 128.3, 128.1, 125.5, 74.5, 72.6, 53.4, 37.0.

HRMS (ESI) ( $M+H^+$ ): calcd for 262.1192 ( $C_{13}H_{16}N_3O_3$ ), found 262.1185.

### Photooxygenation of **8**

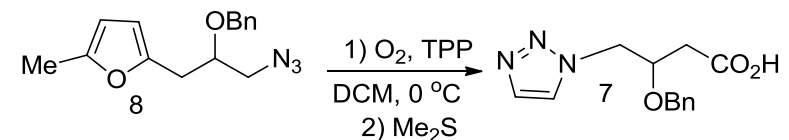

The general procedure was employed with DCM, **8** (108 mg, 0.39 mmol), TPP (ca.) and  $Me_2S$  (0.30 mL, 9.02 mmol). Trituration provided **7** (75.00 mg, 74%) as a white solid. Mp 90.5- 91.5 °C.

IR (neat,  $cm^{-1}$ ) 3137, 3031, 2919, 2560, 1720, 1496, 1452, 1401, 1351, 1251, 1284, 1205, 1075;

$^1H$  NMR (400 MHz,  $CDCl_3$ )  $\delta$  11.09 (brs, 1H), 7.71 (d,  $J=0.9$  Hz, 1H), 7.64 (d,  $J=3.0$  Hz, 1H), 7.35-7.20 (m, 5H), 4.66 (dd,  $J=14.2$  Hz,  $J=3.8$  Hz, 1H), 4.60 (d,  $J=11.3$  Hz, 1H), 4.57 (dd,  $J=14.2$  Hz,  $J=6.4$  Hz, 1H), 4.38 (d,  $J=11.3$  Hz, 1H), 4.33-4.27 (m, 1H), 2.63 (dd,  $J=15.0$  Hz,  $J=4.6$  Hz, 1H), 2.58 (dd,  $J=15.0$  Hz,  $J=4.4$  Hz, 1H);

$^{13}C$  NMR (100 MHz,  $CDCl_3$ )  $\delta$  174.5, 137.3, 133.6, 128.8, 128.3, 128.1, 125.5, 74.5, 72.6, 53.4, 37.0.

HRMS (ESI) ( $M+H^+$ ): calcd for 262.1192 ( $C_{13}H_{16}N_3O_3$ ), found 262.1185.

### Photooxygenation of **9**

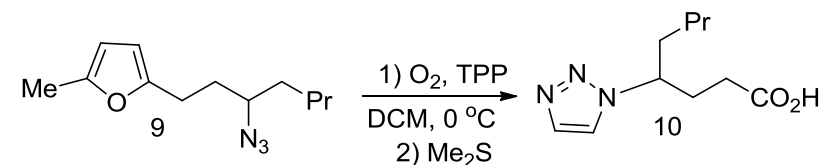

The general procedure was employed with DCM, **9** (119 mg, 0.54 mmol), TPP (ca.) and  $Me_2S$  (0.40 mL, 5.38 mmol). Trituration provided **10** (99 mg, 87%) as a white solid. Mp 67.5-68.8 °C.



IR (neat,  $\text{cm}^{-1}$ ) 3425, 3160, 3137, 2952, 2860, 2508, 1712, 1574, 1487, 1467, 1459.

$^1\text{H}$  NMR (400 MHz,  $\text{CDCl}_3$ )  $\delta$  8.96 (brs, 1H), 7.72 (s, 1H), 7.57 (s, 1H), 4.60 (m, 1H), 2.30-2.08 (m, 4H), 1.98-1.79 (m, 2H), 1.35-1.10 (m, 3H), 1.01 (m, 1H), 0.81 (t,  $J=7.1$  Hz, 3H).

$^{13}\text{C}$  NMR (100 MHz,  $\text{CDCl}_3$ )  $\delta$  177.6, 133.7, 122.7, 61.6, 35.5, 31.0, 30.8, 28.2, 22.4, 14.0.

HRMS (ESI) ( $\text{M}-\text{H}^+$ ): calcd for 210.1242 ( $\text{C}_{10}\text{H}_{16}\text{N}_3\text{O}_2$ ), found 210.1248.

### Photooxygenation of **11**

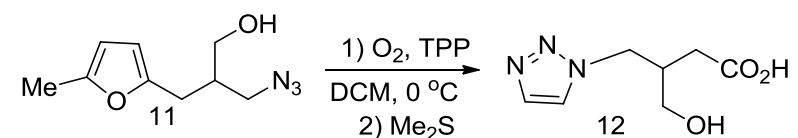

The general procedure was employed with DCM, **11** (90 mg, 0.46 mmol), TPP (ca.) and  $\text{Me}_2\text{S}$  (0.34 mL, 4.61 mmol). Trituration provided **10** (65 mg, 76%) as a white solid. Mp  $56.7\text{--}57.8^\circ\text{C}$ .

IR (neat,  $\text{cm}^{-1}$ ) 3512, 3145, 3083, 2925, 2103, 1775, 1467, 1439, 1420.

$^1\text{H}$  NMR (400 MHz,  $\text{CDCl}_3$ )  $\delta$  7.75 (s, 1H), 7.59 (s, 1H), 4.49 (d,  $J=7.4$  Hz, 2H), 4.43 (dd,  $J=9.6$  Hz,  $J=7.3$  Hz, 1H), 4.18 (dd,  $J=9.6$  Hz,  $J=5.6$  Hz, 1H), 3.27 (m, 1H), 2.73 (dd,  $J=17.8$  Hz,  $J=8.7$  Hz, 1H), 2.38 (dd,  $J=17.8$  Hz,  $J=6.4$  Hz, 1H).

$^{13}\text{C}$  NMR (100 MHz,  $\text{CDCl}_3$ )  $\delta$  175.3, 134.4, 124.2, 70.5, 51.7, 36.4, 32.2.

HRMS (ESI) ( $\text{M}-\text{H}^+$ ): calcd for 184.0722 ( $\text{C}_7\text{H}_{10}\text{N}_3\text{O}_3$ ), found 184.0734.

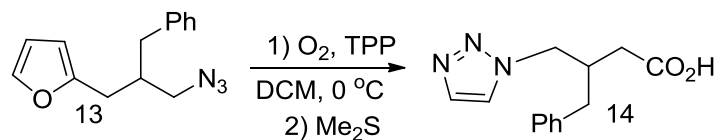

The general procedure was employed with DCM, **13** (116 mg, 0.48 mmol), TPP (ca.) and Me<sub>2</sub>S (0.35 mL, 4.81 mmol). Trituration provided **14** (105 mg, 90%) as a white solid. Mp 143.7-144.8 °C.

IR (neat, cm<sup>-1</sup>) 3446, 3164, 3125, 3024, 3004, 2950, 2931, 2905, 2543, 1878, 1732, 1494, 1407.

<sup>1</sup>H NMR (400 MHz, CDCl<sub>3</sub>) δ 7.73 (s, 1H), 7.56 (s, 1H), 7.35-7.17 (m, 5H), 4.45 (d, *J*=6.3 Hz, 2H), 2.82-2.62 (m, 3H), 2.42-2.27 (m, 2H).

<sup>13</sup>C NMR (100 MHz, CDCl<sub>3</sub>) δ 175.6, 138.3, 134.0, 129.4, 129.0, 127.0, 124.6, 52.5, 38.3, 38.0, 35.2.

HRMS (ESI) (M-H<sup>+</sup>): calcd for 244.1086 (C<sub>13</sub>H<sub>14</sub>N<sub>3</sub>O<sub>2</sub>), found 244.1096.

### Photooxygenation of **15**

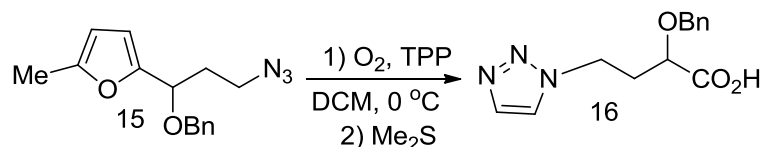

The general procedure was employed with DCM, **15** (233.00 mg, 0.86 mmol), TPP (ca.) and Me<sub>2</sub>S (0.63 mL, 8.60 mmol). Trituration provided **16** (180 mg, 80%) as a white solid. Mp 110-111 °C.

IR (neat, cm<sup>-1</sup>) 3444, 3129, 3030, 2932, 2862, 1605, 1497, 1454, 1432, 1315.

<sup>1</sup>H NMR (400 MHz, CDCl<sub>3</sub>) δ 8.57 (brs, 1H), 7.65 (s, 1H), 7.39 (s, 1H), 7.33 (s, 5H), 4.77 (d, *J*=11.4 Hz, 1H), 4.51 (t, *J*=6.5 Hz, 2H), 4.41 (d, *J*=11.4 Hz, 1H), 3.92 (dd, *J*= 4.5 Hz, *J*=7.3 Hz, 1H), 2.50-2.34 (m, 2H).

$^{13}\text{C}$  NMR (100 MHz,  $\text{CDCl}_3$ )  $\delta$  175.1, 137.2, 133.5, 128.5, 2x128.4, 124.4, 74.6, 72.8, 46.5, 33.2.

HRMS (ESI) ( $\text{M}+\text{H}^+$ ): calcd for 262.1192 ( $\text{C}_{13}\text{H}_{16}\text{N}_3\text{O}_3$ ), found 262.1185.

### Photooxygenation of 17

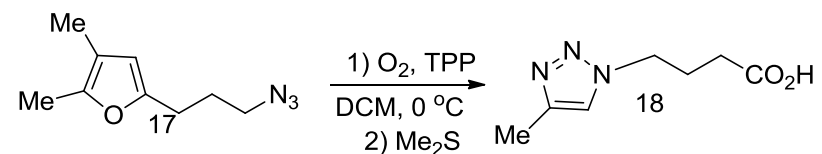

The general procedure was employed with DCM, **17** (260 mg, 1.45 mmol), TPP (ca.) and  $\text{Me}_2\text{S}$  (1.07 mL, 14.50 mmol). Trituration provided **18** (219 mg, 89%) as a white solid. Mp  $85.7\text{--}86.7^\circ\text{C}$ .

IR (neat,  $\text{cm}^{-1}$ ) 3740, 3322, 3141, 3091, 2956, 2863, 2098, 1804, 1740, 1555, 1415, 1345.

$^1\text{H}$  NMR (400 MHz,  $\text{CDCl}_3$ )  $\delta$  7.30 (s, 1H), 4.40 (t,  $J=6.7$  Hz, 2H), 2.47 (t,  $J=7.0$  Hz, 2H), 2.34 (s, 3H), 2.23 (m, 2H).

$^{13}\text{C}$  NMR (100 MHz,  $\text{CDCl}_3$ )  $\delta$  168.3, 143.9, 121.6, 48.6, 31.9, 24.9, 11.0.

HRMS (ESI) ( $\text{M}+\text{H}^+$ ): calcd for 170.0930 ( $\text{C}_7\text{H}_{12}\text{N}_3\text{O}_2$ ), found 170.0929.

### Photooxygenation of 19

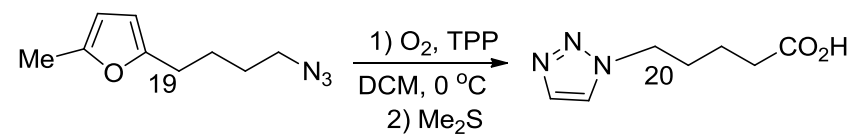

The general procedure was employed with DCM, **19** (203.00 mg, 1.13 mmol), TPP (ca.) and Me<sub>2</sub>S (0.83 mL, 11.3 mmol). Trituration provided **20** (140 mg, 73%) as a white solid. Mp 103-104 °C.

IR (neat, cm<sup>-1</sup>) 3611, 3158, 2951, 2511, 1922, 1717, 1483, 1441, 1414.

<sup>1</sup>H NMR (400 MHz, CDCl<sub>3</sub>) δ 7.72 (s, 1H), 7.56 (s, 1H), 4.42 (t, *J*=7.0 Hz, 2H), 2.41 (t, *J*=7.2 Hz, 2H), 2.0 (m, 2H), 1.67 (m, 2H).

<sup>13</sup>C NMR (100 MHz, CDCl<sub>3</sub>) δ 177.7, 134.0, 123.5, 50.0, 33.2, 29.7, 21.8.

HRMS (ESI) (M+H<sup>+</sup>): calcd for 170.0930 (C<sub>7</sub>H<sub>12</sub>N<sub>3</sub>O<sub>2</sub>), found 170.0930.

### Photooxygenation of **21**

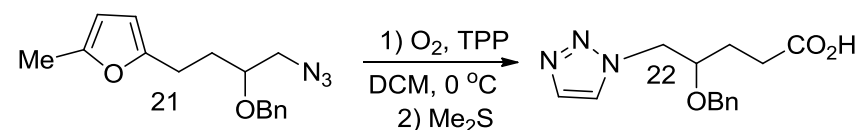

The general procedure was employed with DCM, **21** (102 mg, 0.36 mmol), TPP (ca.) and Me<sub>2</sub>S (0.26 mL, 3.58 mmol). The solvent was removed and residue was filtered through a pad of silica gel with DCM/methanol to give **22** (60 mg, 60%, *R*<sub>f</sub>=0.5, DCM/methanol, 1:9) as a yellow liquid.

IR (neat, cm<sup>-1</sup>) 3637, 3121, 3022, 2931, 2879, 2599, 1722, 1451, 1347, 1256, 1220, 1078, 1021.

<sup>1</sup>H NMR (400 MHz, CDCl<sub>3</sub>) δ 7.71 (s, 1H), 7.63 (s, 1H), 7.35-7.20 (m, 5H), 4.56 (dd, *J*=14.1, *J*=3.6, 1H), 4.41 (dd, *J*=14.1, *J*=6.77, 1H), 4.30 (d, *J*=11.3, 1H), 3.93 (m, 1H), 2.48 (t, *J*=7.2, 2H), 1.93-1.77 (m, 2H).

<sup>13</sup>C NMR (100 MHz, CDCl<sub>3</sub>) δ 177.6, 177.4, 137.5, 2x133.8, 128.8, 128.7, 3x128.3, 2x128.1, 2x125.1, 76.8, 72.6, 53.4, 2x29.5, 27.1.

HRMS (ESI) (M+H<sup>+</sup>): calcd for 276.1348 (C<sub>14</sub>H<sub>18</sub>N<sub>3</sub>O<sub>3</sub>), found 276.1355.

### Photooxygenation of **23**

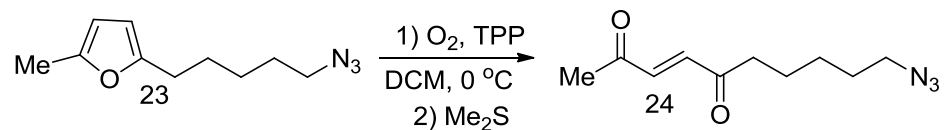

The general procedure was employed with DCM, **23** (153 mg, 0.79 mmol), TPP (ca.) and Me<sub>2</sub>S (0.58 mL, 7.92 mmol). The solvent was removed and residue was filtered through a pad of silica gel with EtOAc/hexanes to give **24** (129 mg, 78%, *R<sub>f</sub>*=0.5, EtOAc/hexanes, 2:3) as a yellow liquid.

IR (neat, cm<sup>-1</sup>) 2935, 2092, 1693, 1609, 1391, 1257, 1182.

<sup>1</sup>H NMR (400 MHz, CDCl<sub>3</sub>) δ 6.27 (s, 2H), 3.23 (t, *J*=6.9 Hz, 2H), 2.52 (t, *J*=7.3 Hz, 2H), 2.25 (s, 3H), 1.67-1.52 (m, 4H), 1.42-1.32 (m, 2H).

<sup>13</sup>C NMR (100 MHz, CDCl<sub>3</sub>) δ 202.7, 200.6, 2x135.9, 51.4, 42.3, 30.0, 28.9, 26.3, 23.0.

### 3. References

- (1) Williams, P. D.; LeGoff, E. *Tetrahedron Lett.* **1985**, 26, 1367.
- (2) Gademann, K.; Bethuel, Y. *Angew. Chem.; Int. Ed.* **2004**, 43, 3327.
- (3) Liang, Q.; De Brabander, J. K. *Tetrahedron* **2011**, 67, 5046.
- (4) (a) Adiyaman, M.; Li, H.; Lawson, J. A.; Hwang, S-W.; Khanapure, S. P.; FitzGerald, G. A.; Rokach, J. *Tetrahedron Lett.* **1997**, 38, 3339. (b) Kumar, C. R.; Tsai, C-H.; Chao, Y-S.; Lee, J-C. *Chem.--Eur. J.* **2011**, 17, 8696.

mfi-263-1hnmr  
STANDARD 1H OBSERVE

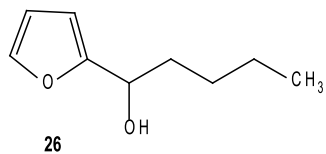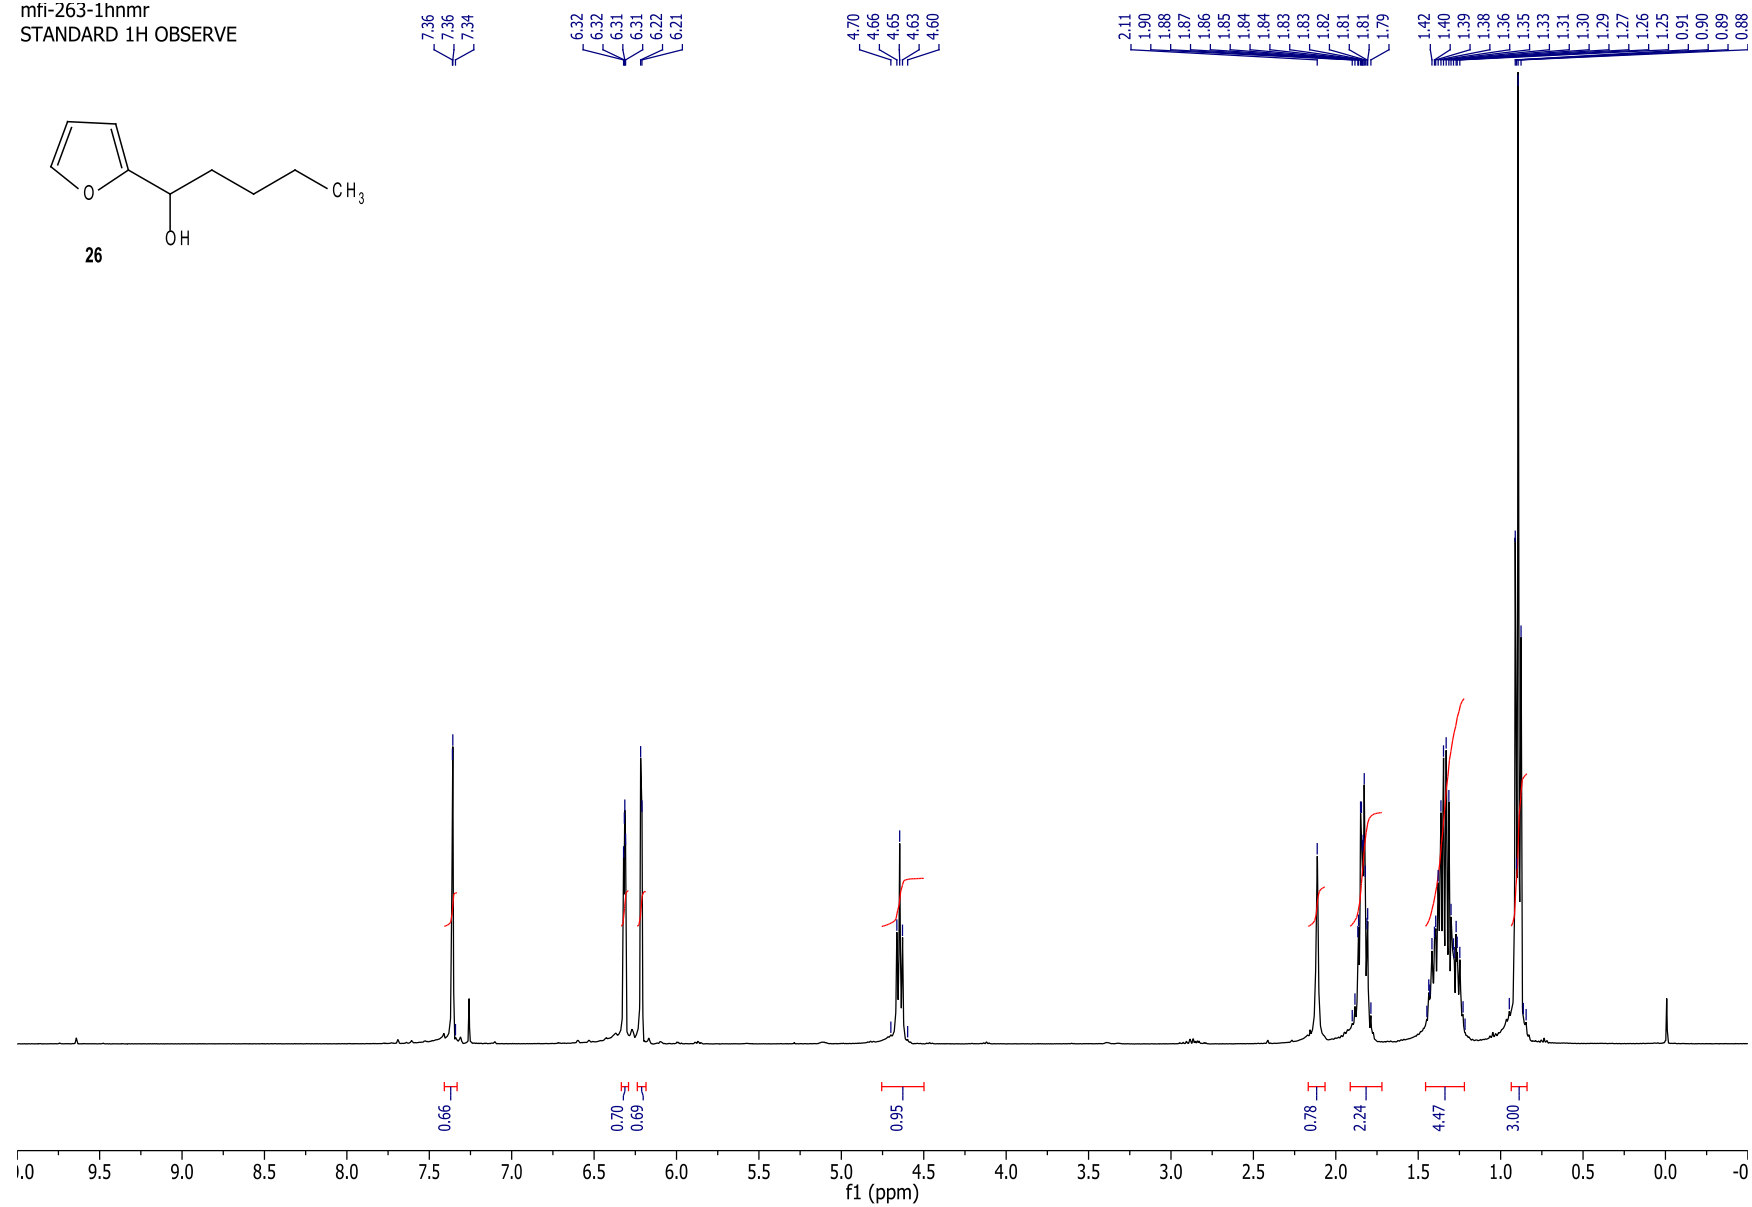

mfi-263-13cnmr  
13C OBSERVE

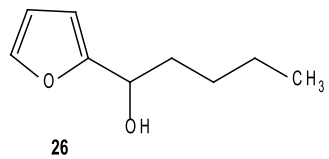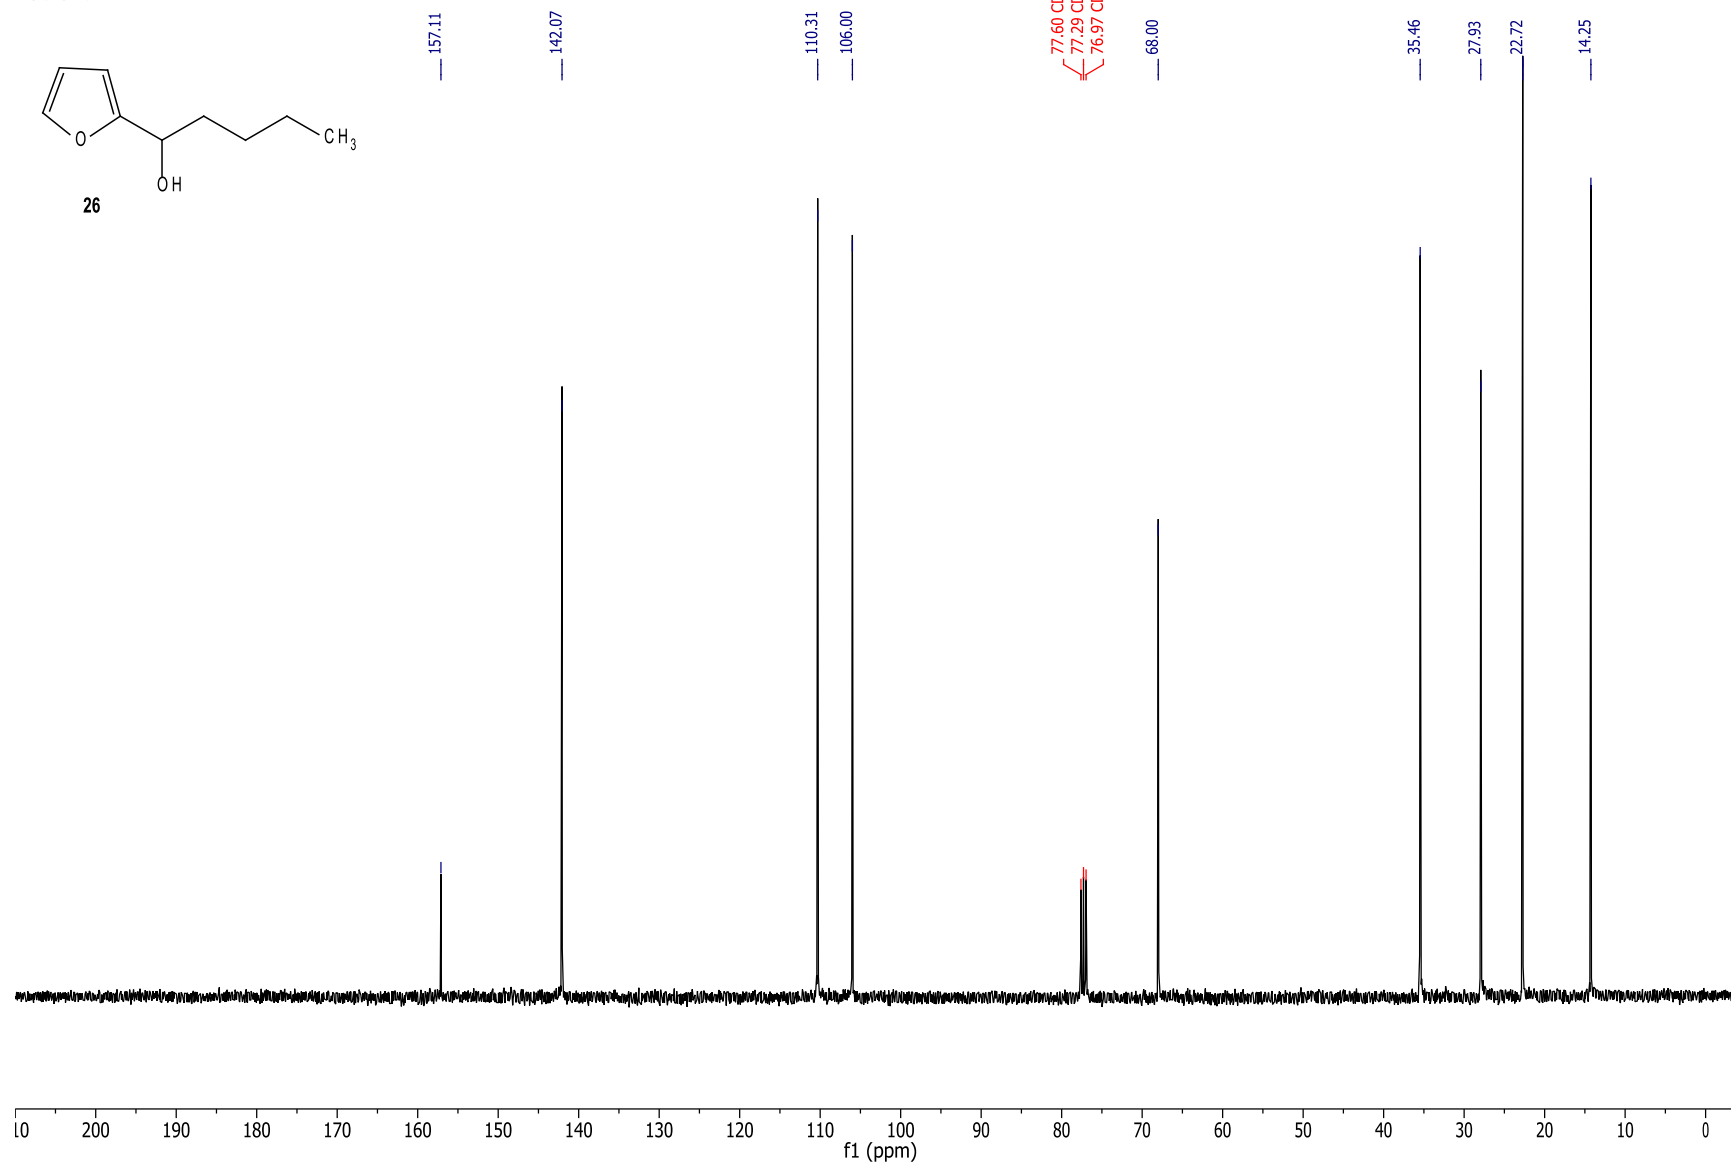

mfi-264-1hnmr 2. kez aldirdim  
STANDARD 1H OBSERVE

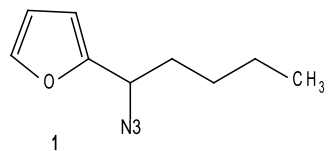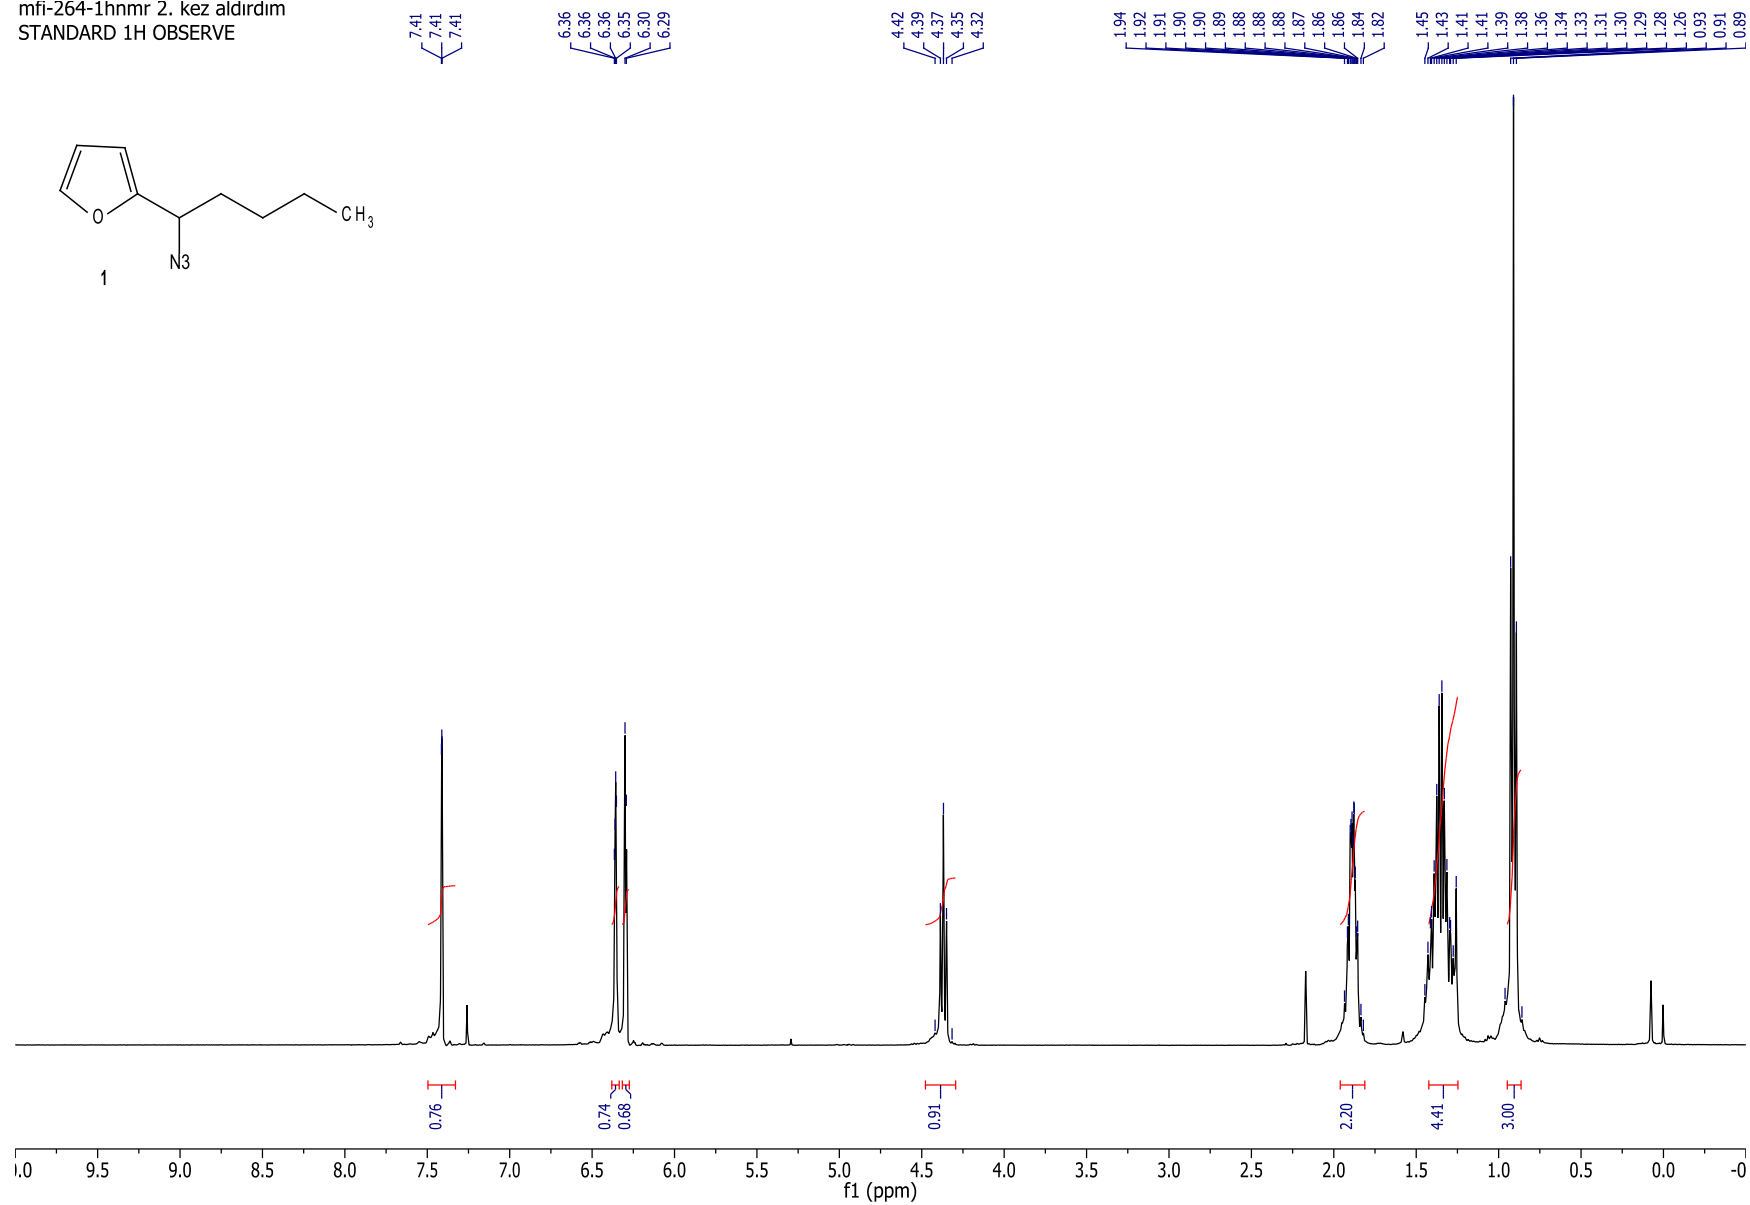



mfi-264-13cnmr  
13C OBSERVE

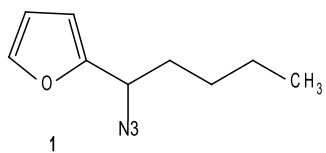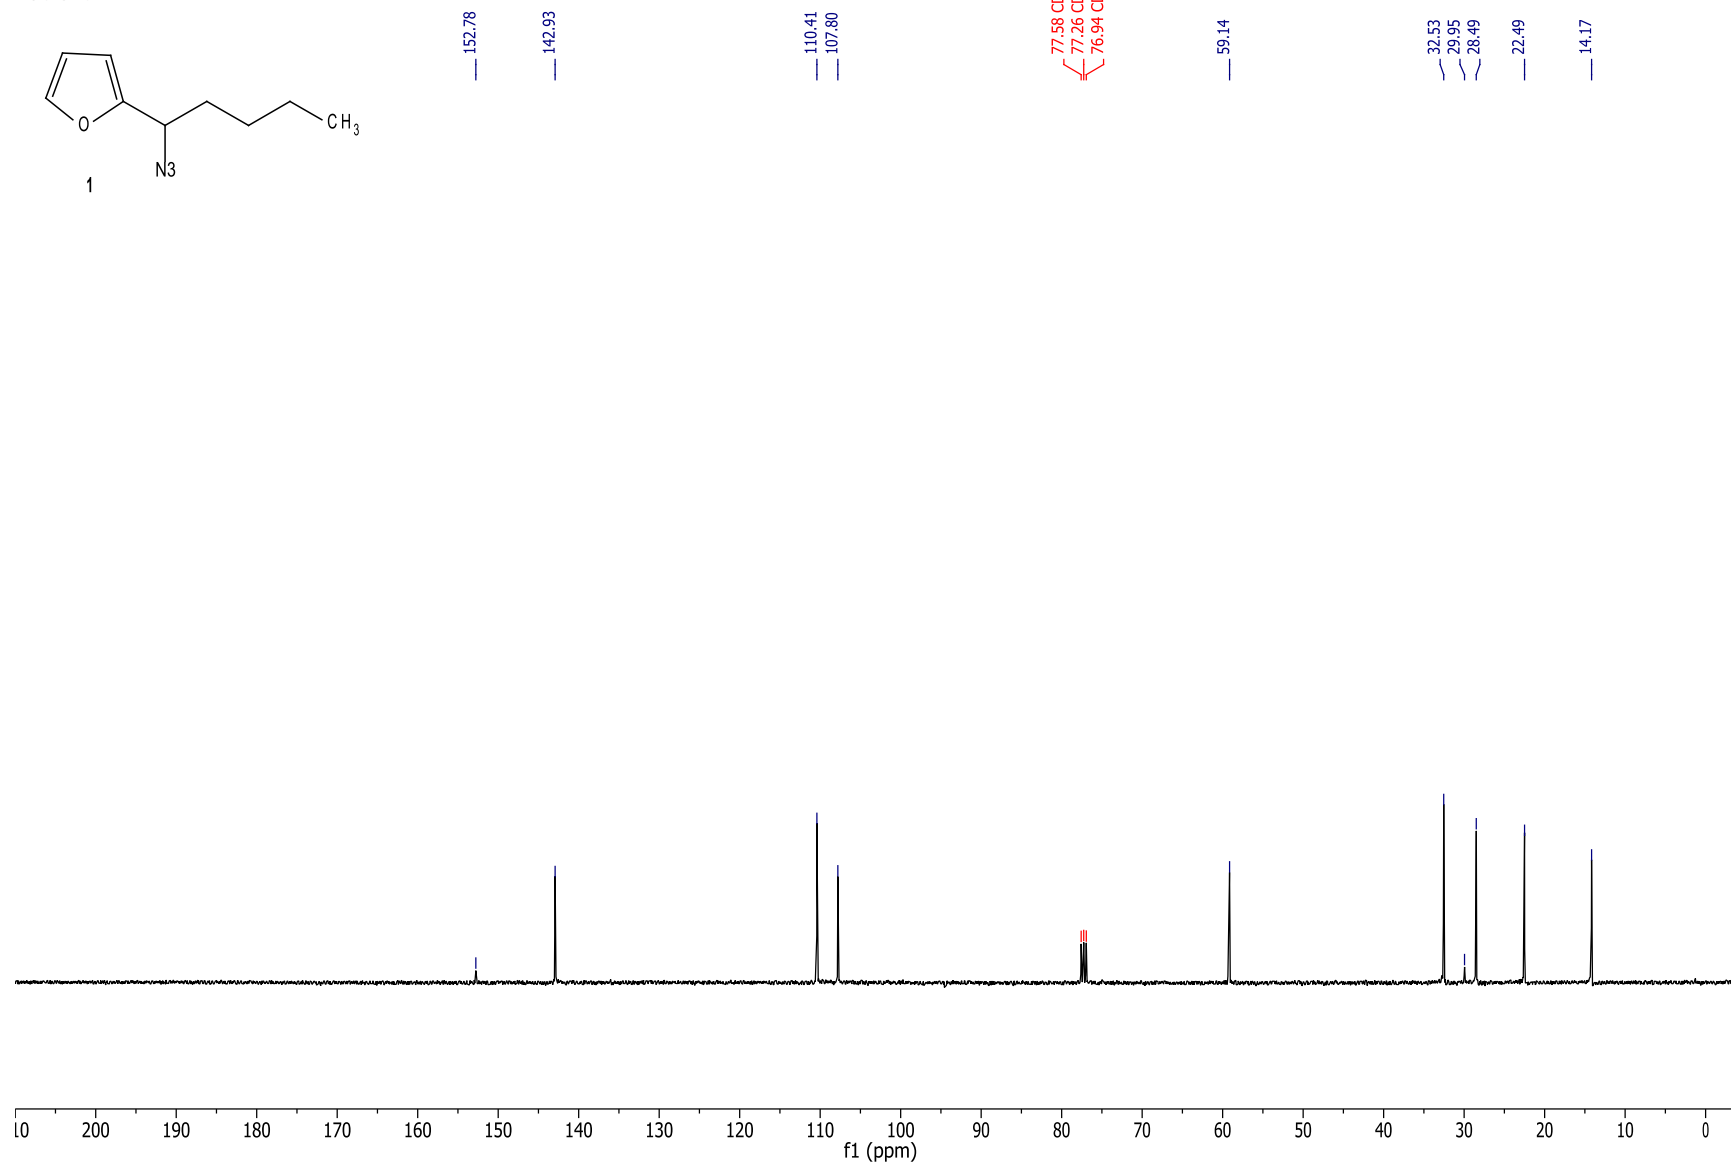

mfi-995120611-1hnmr  
STANDARD 1H OBSERVE

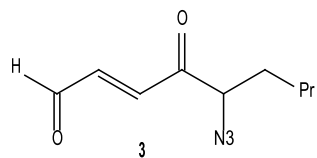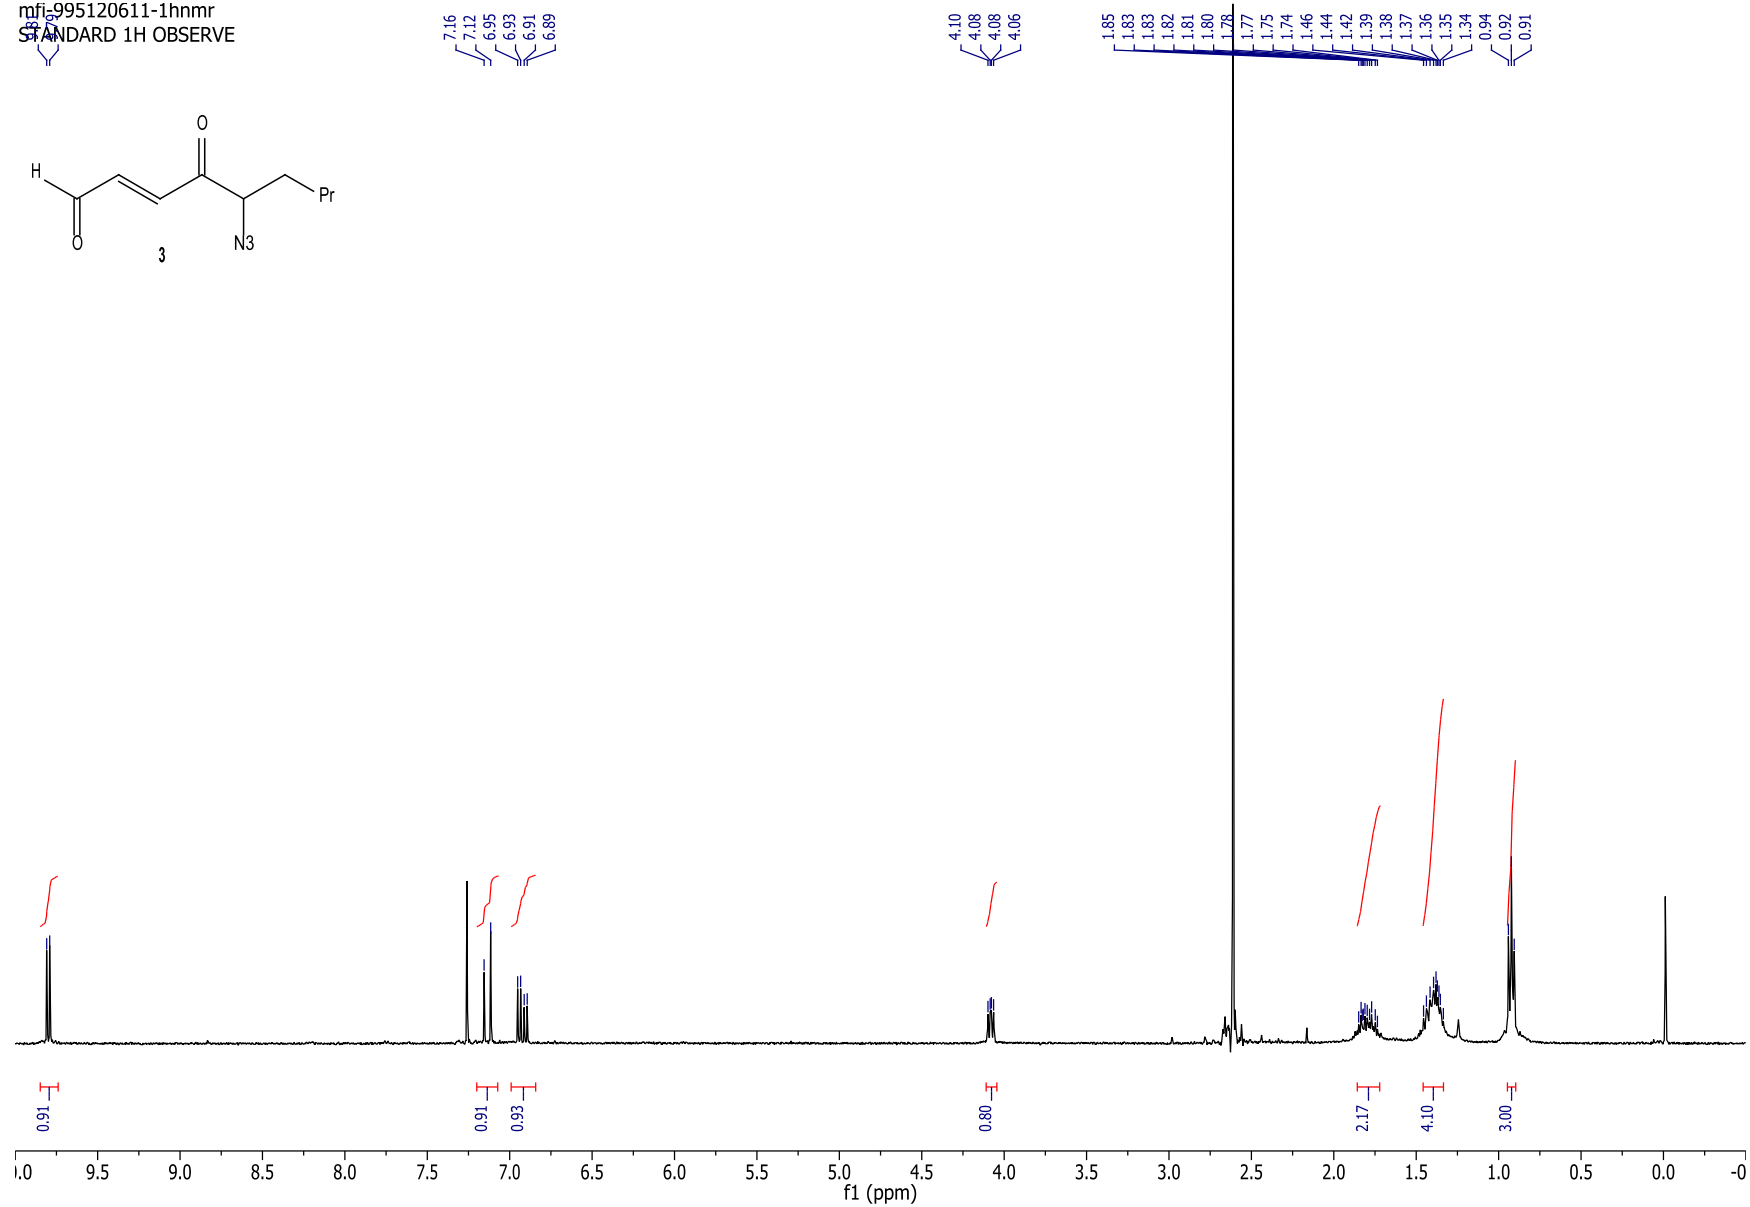

mfi-995120611-13cnmr  
13C OBSERVE

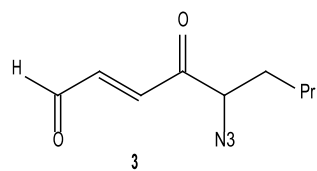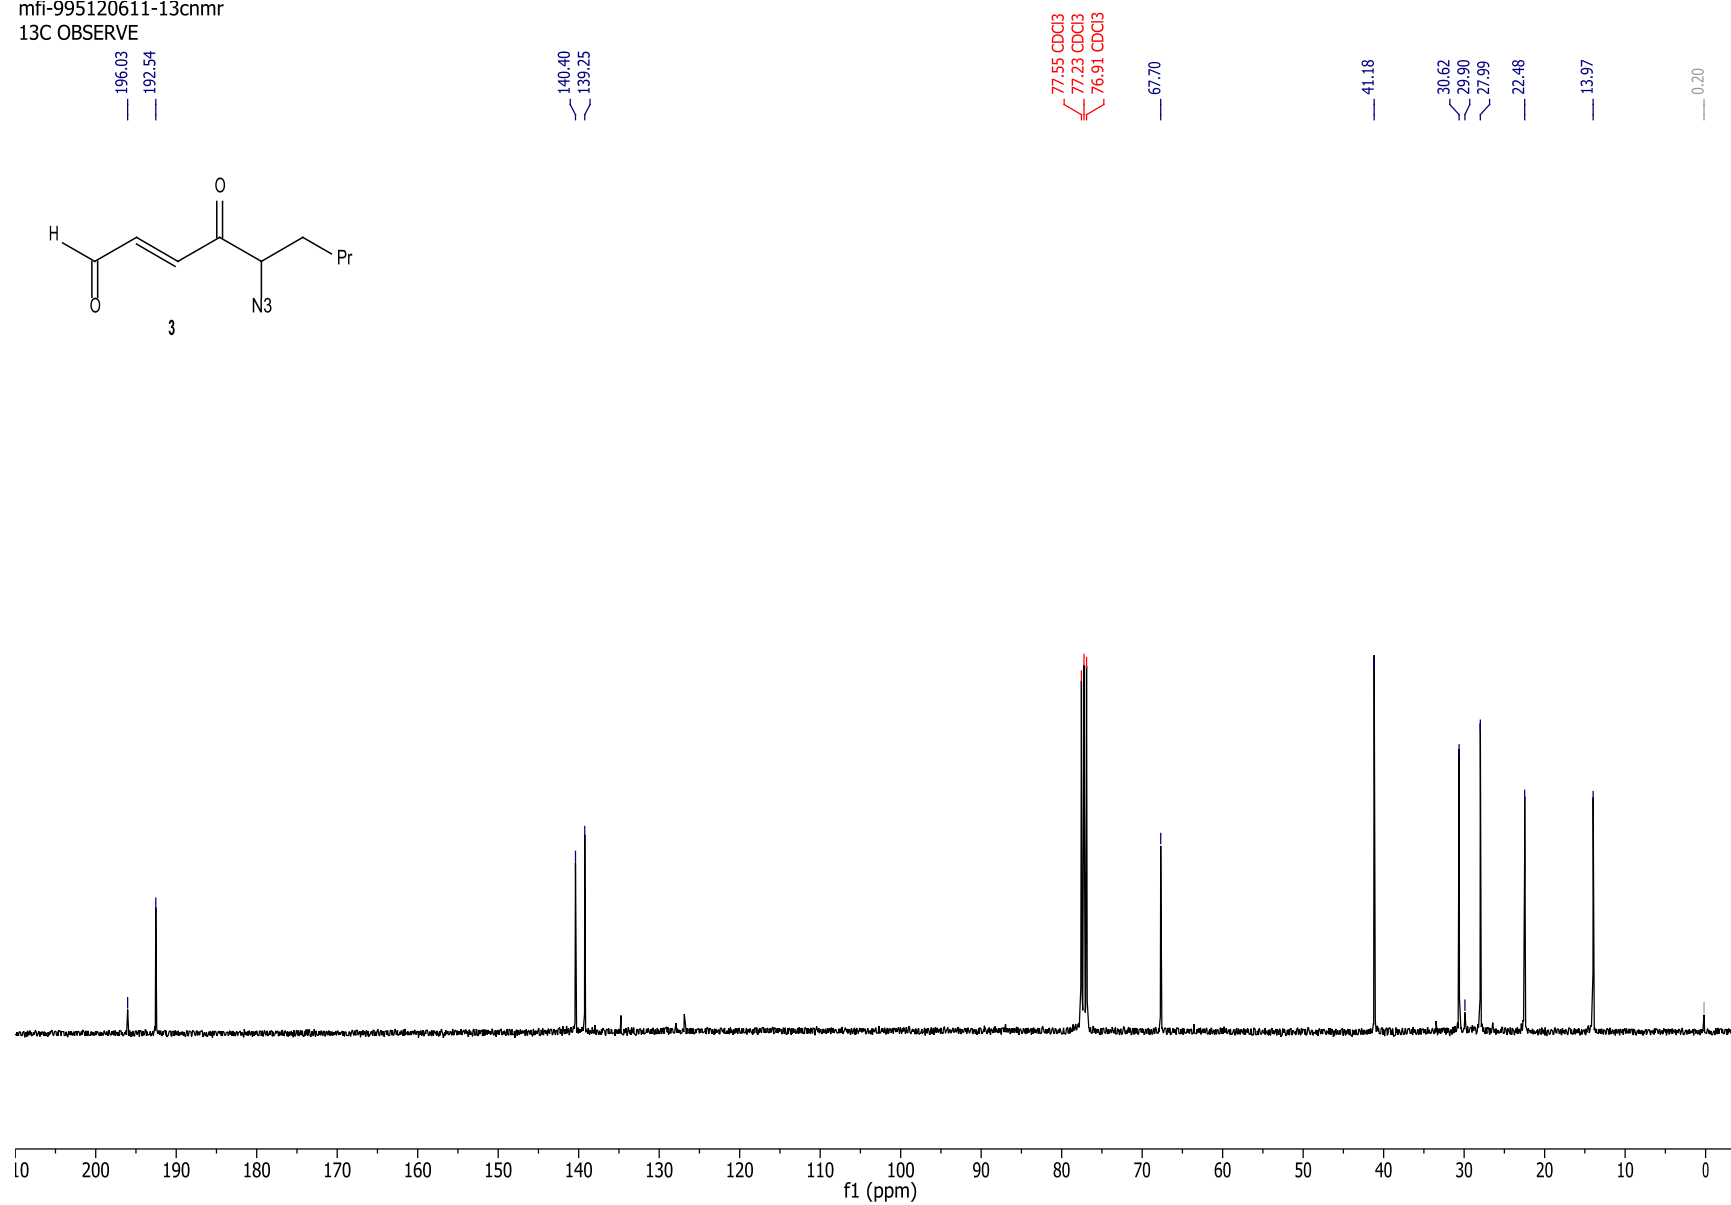

61-h (1)

STANDARD 1H OBSERV

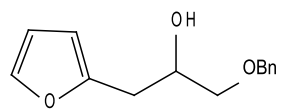

29

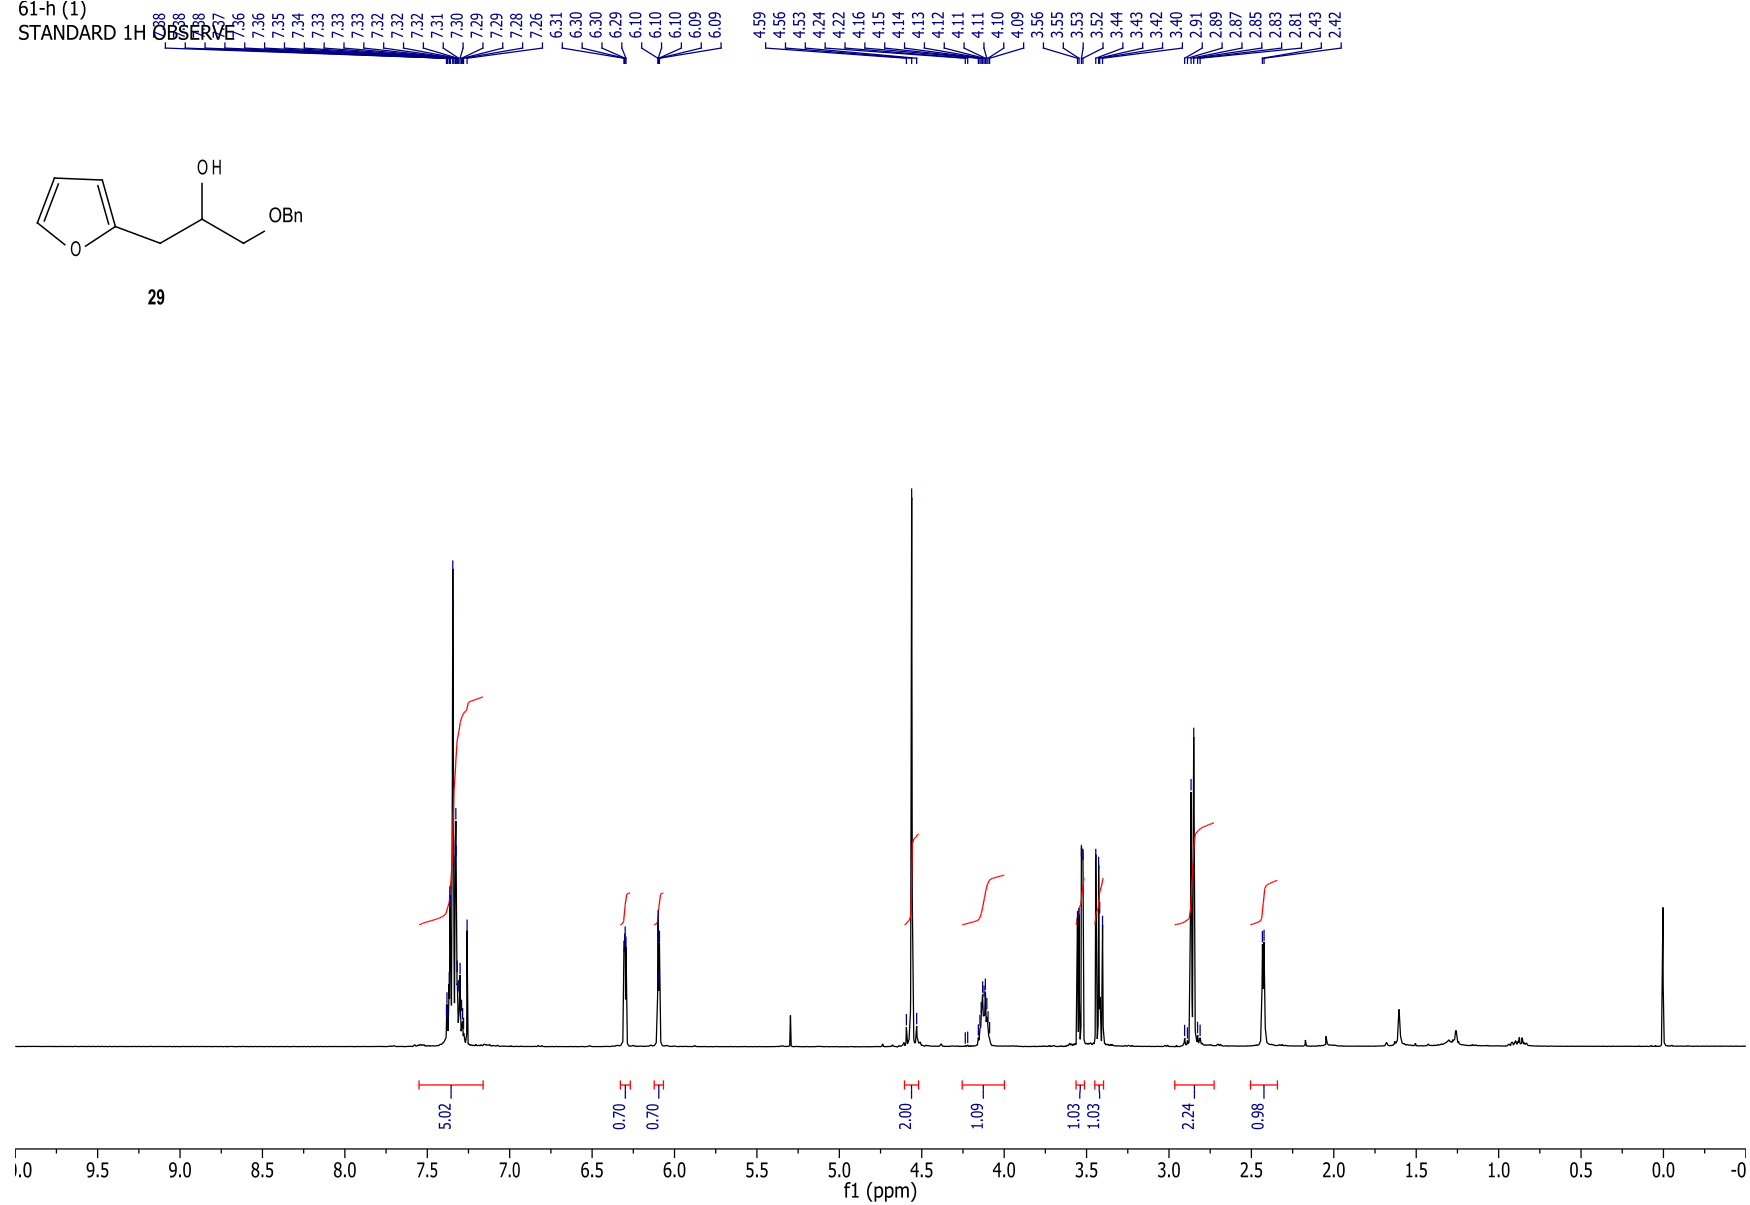

61-c  
13C OBSERVE

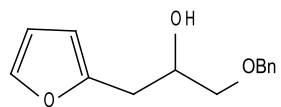

29

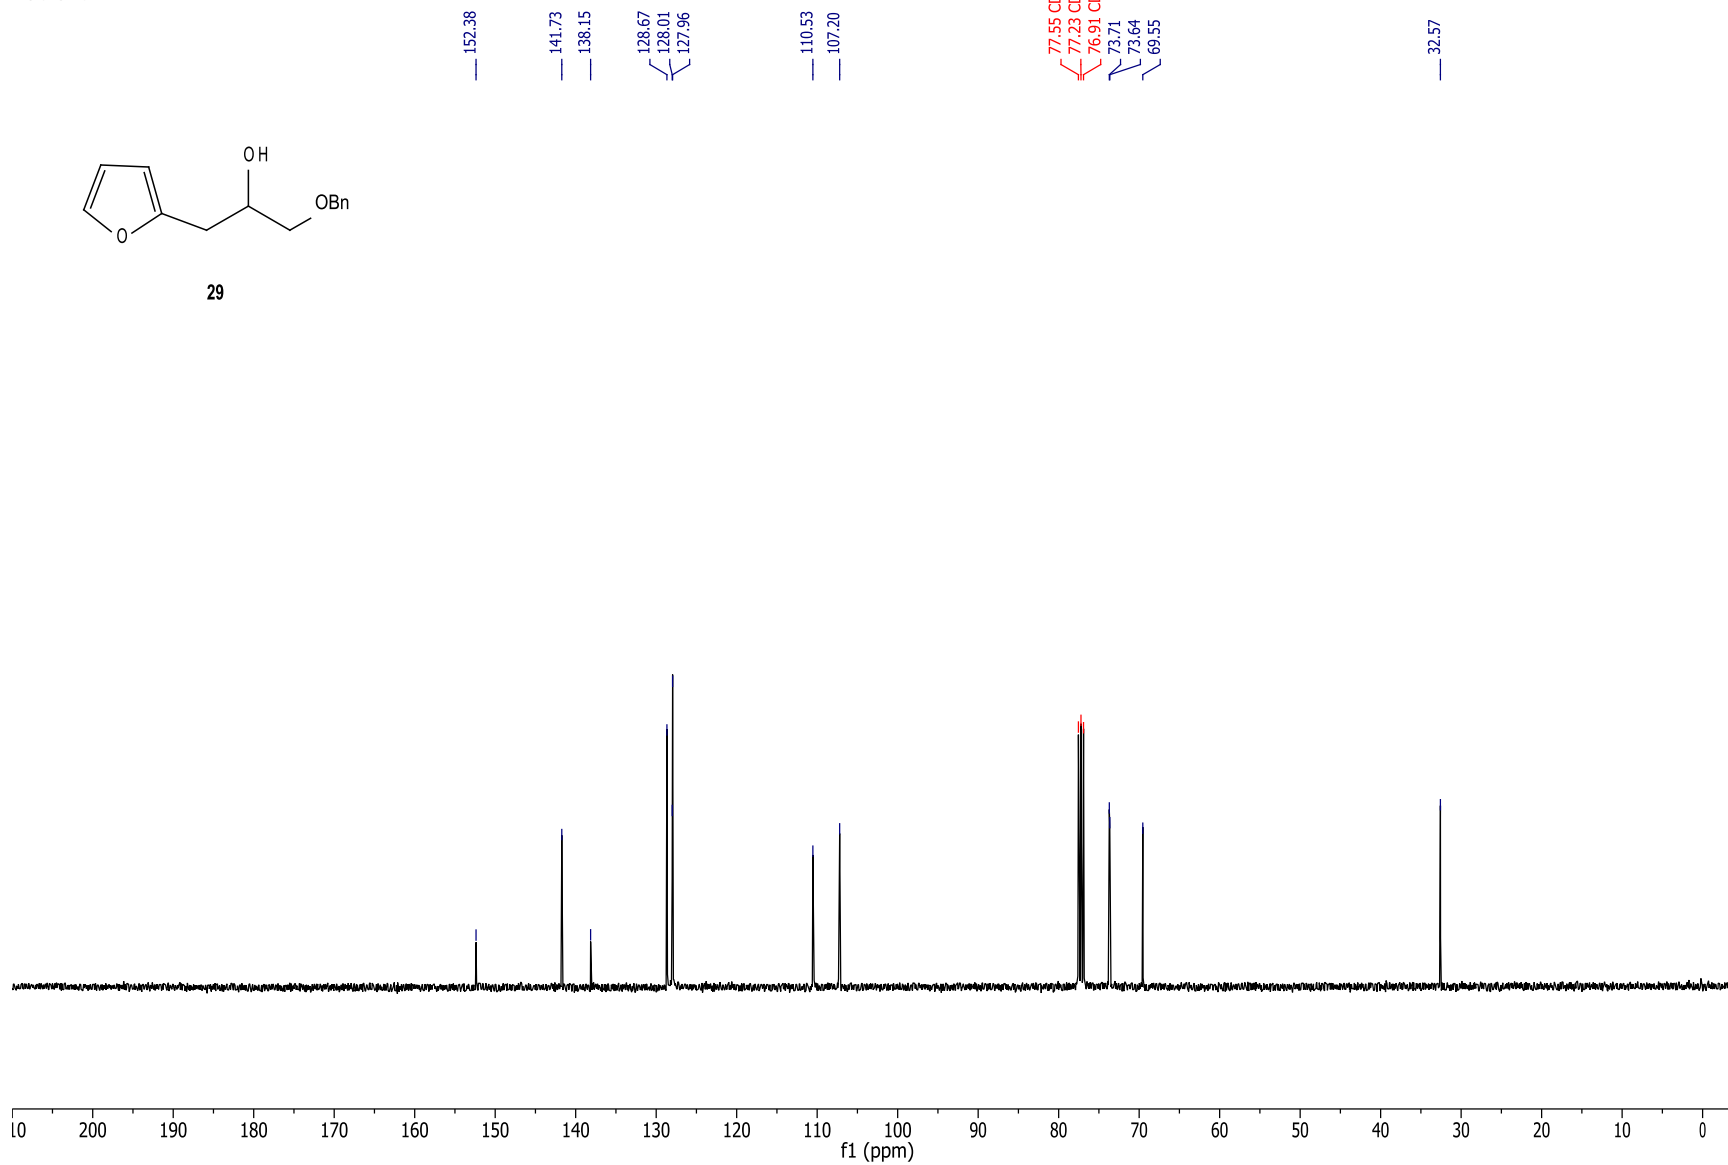

mku-100709-1hpmr  
STANDARD 1H OBSERVE

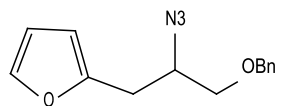

4

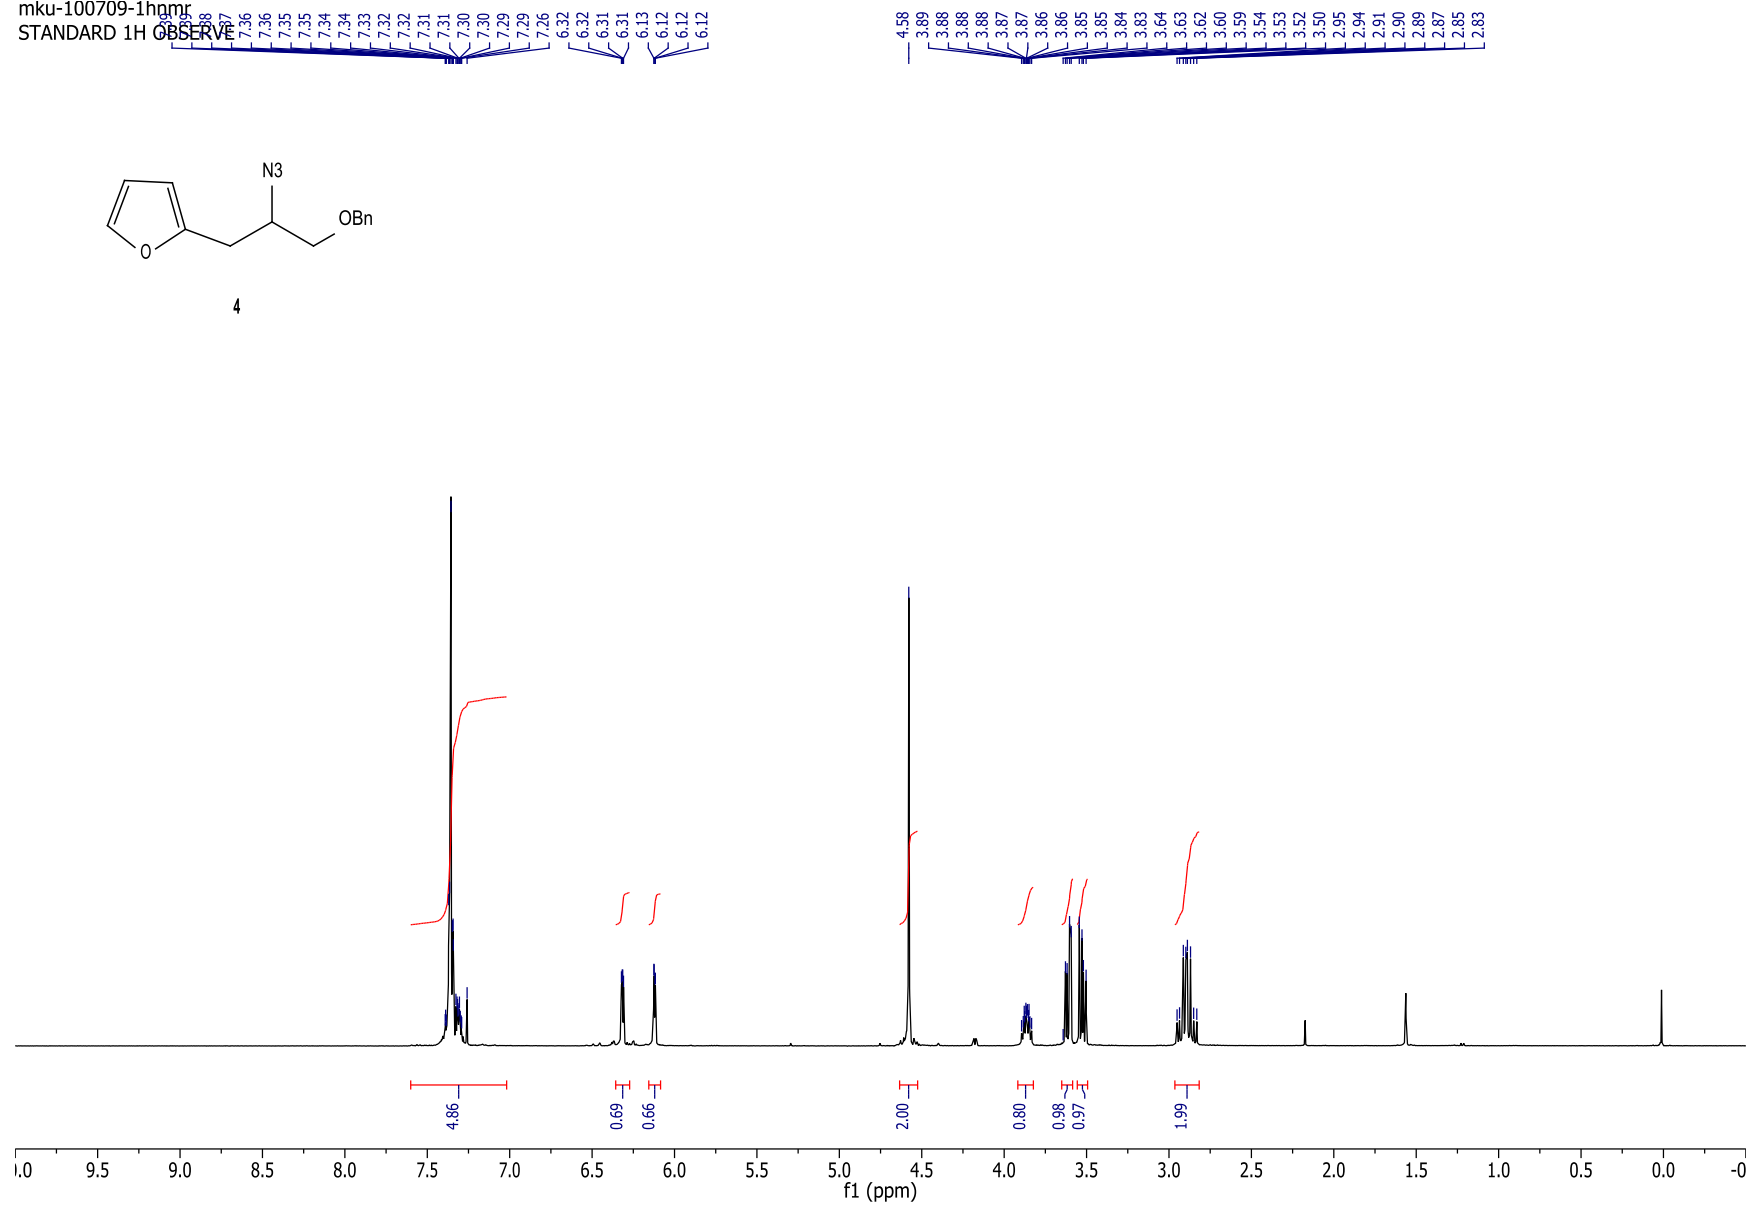

mku-100709-13cnmr  
13C OBSERVE

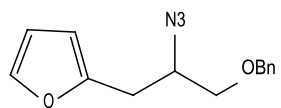

4

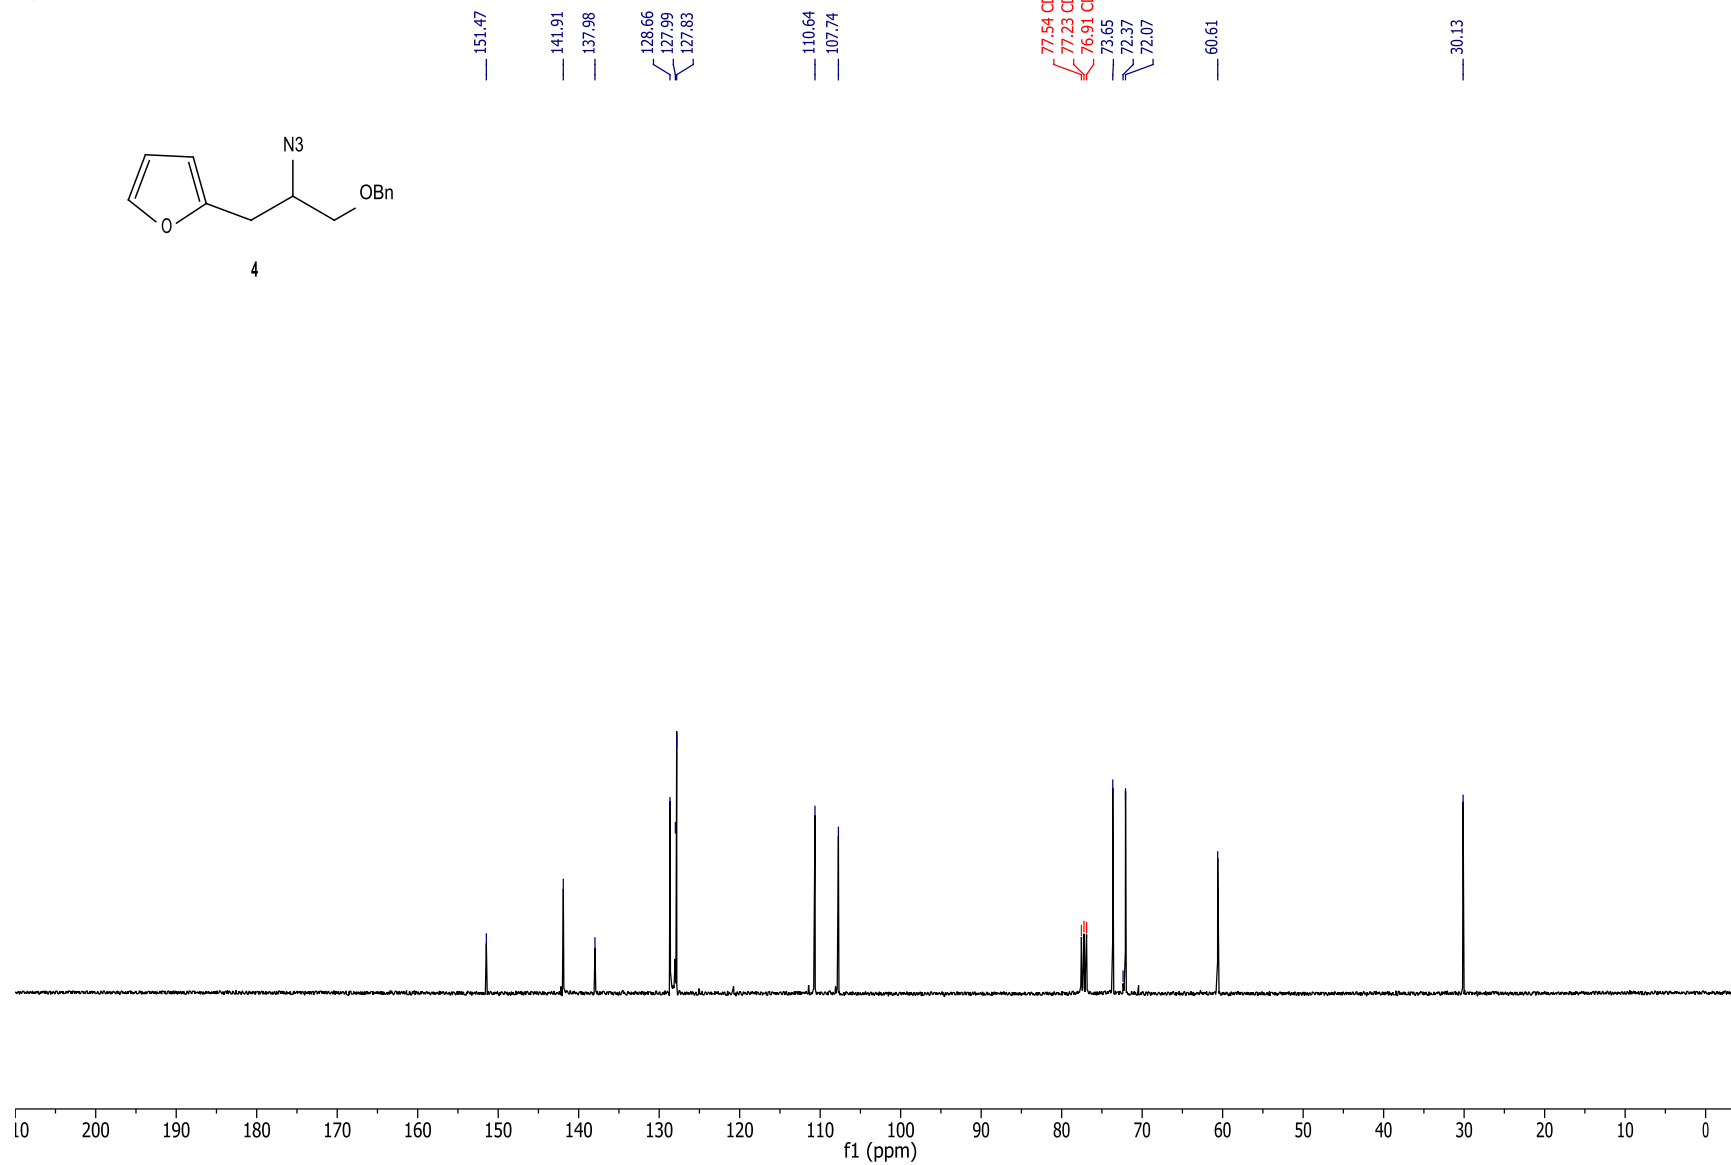

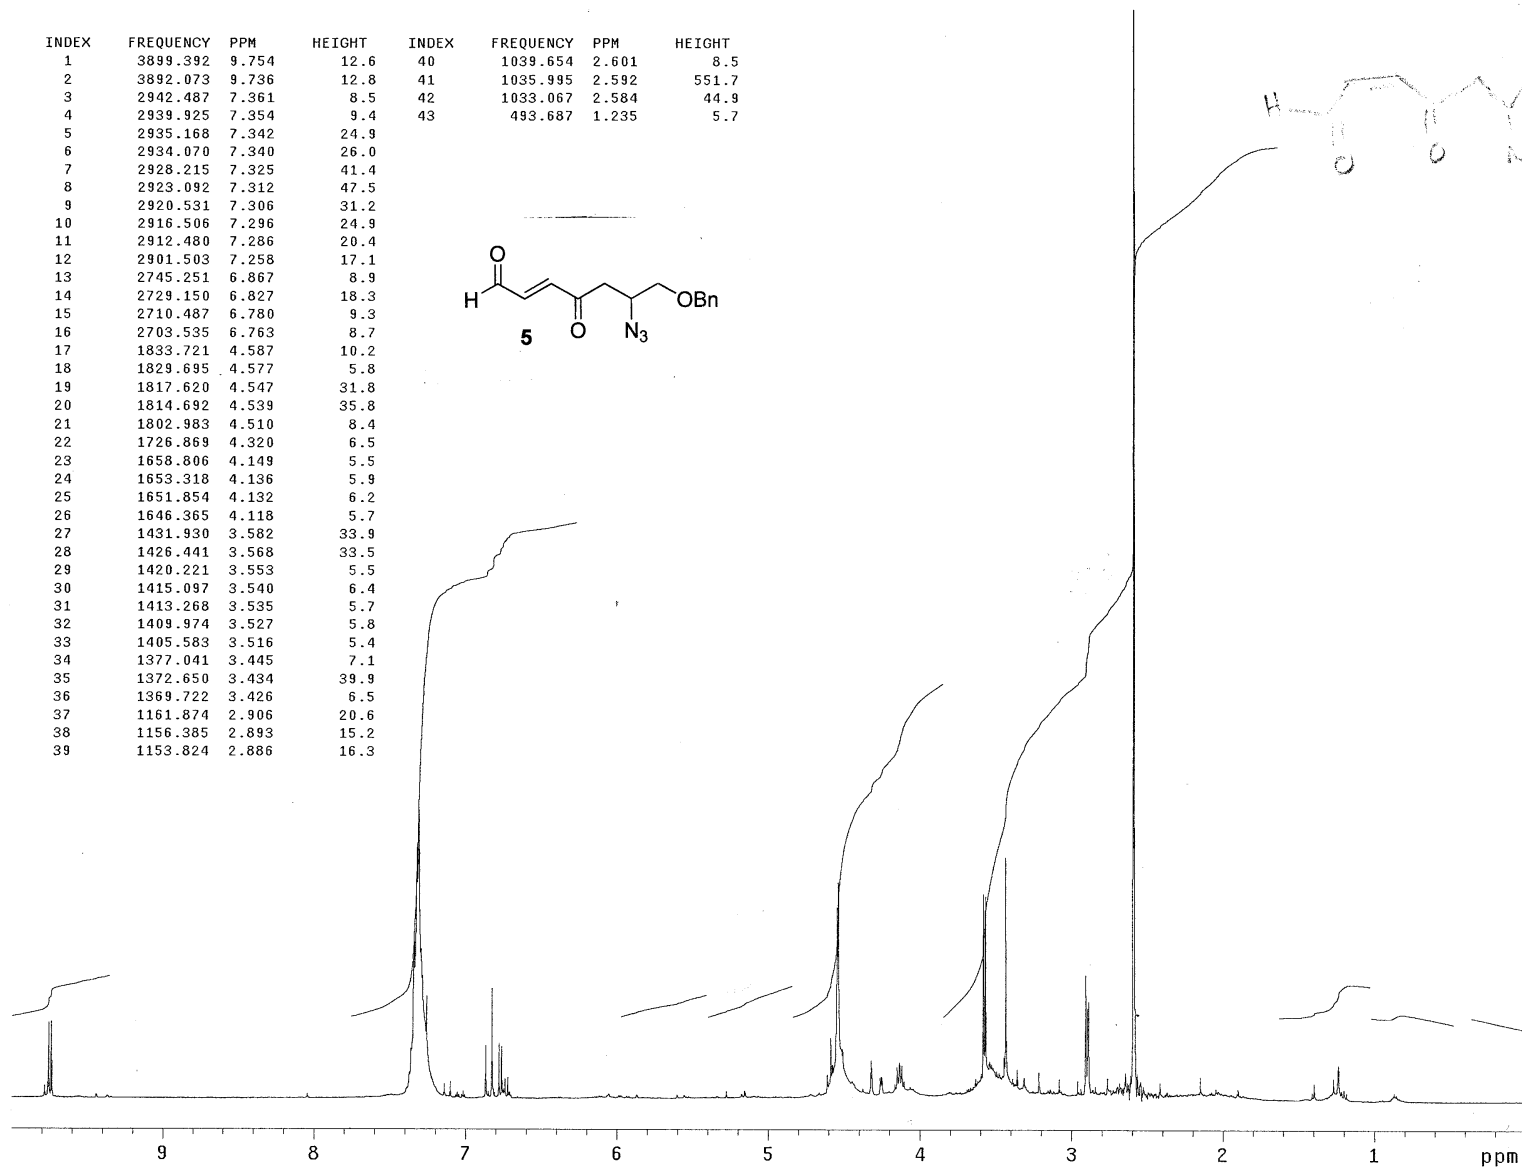



mku-251109-1hnmr  
STANDARD 1H OBSERVE

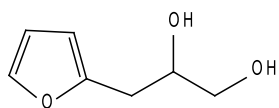

31

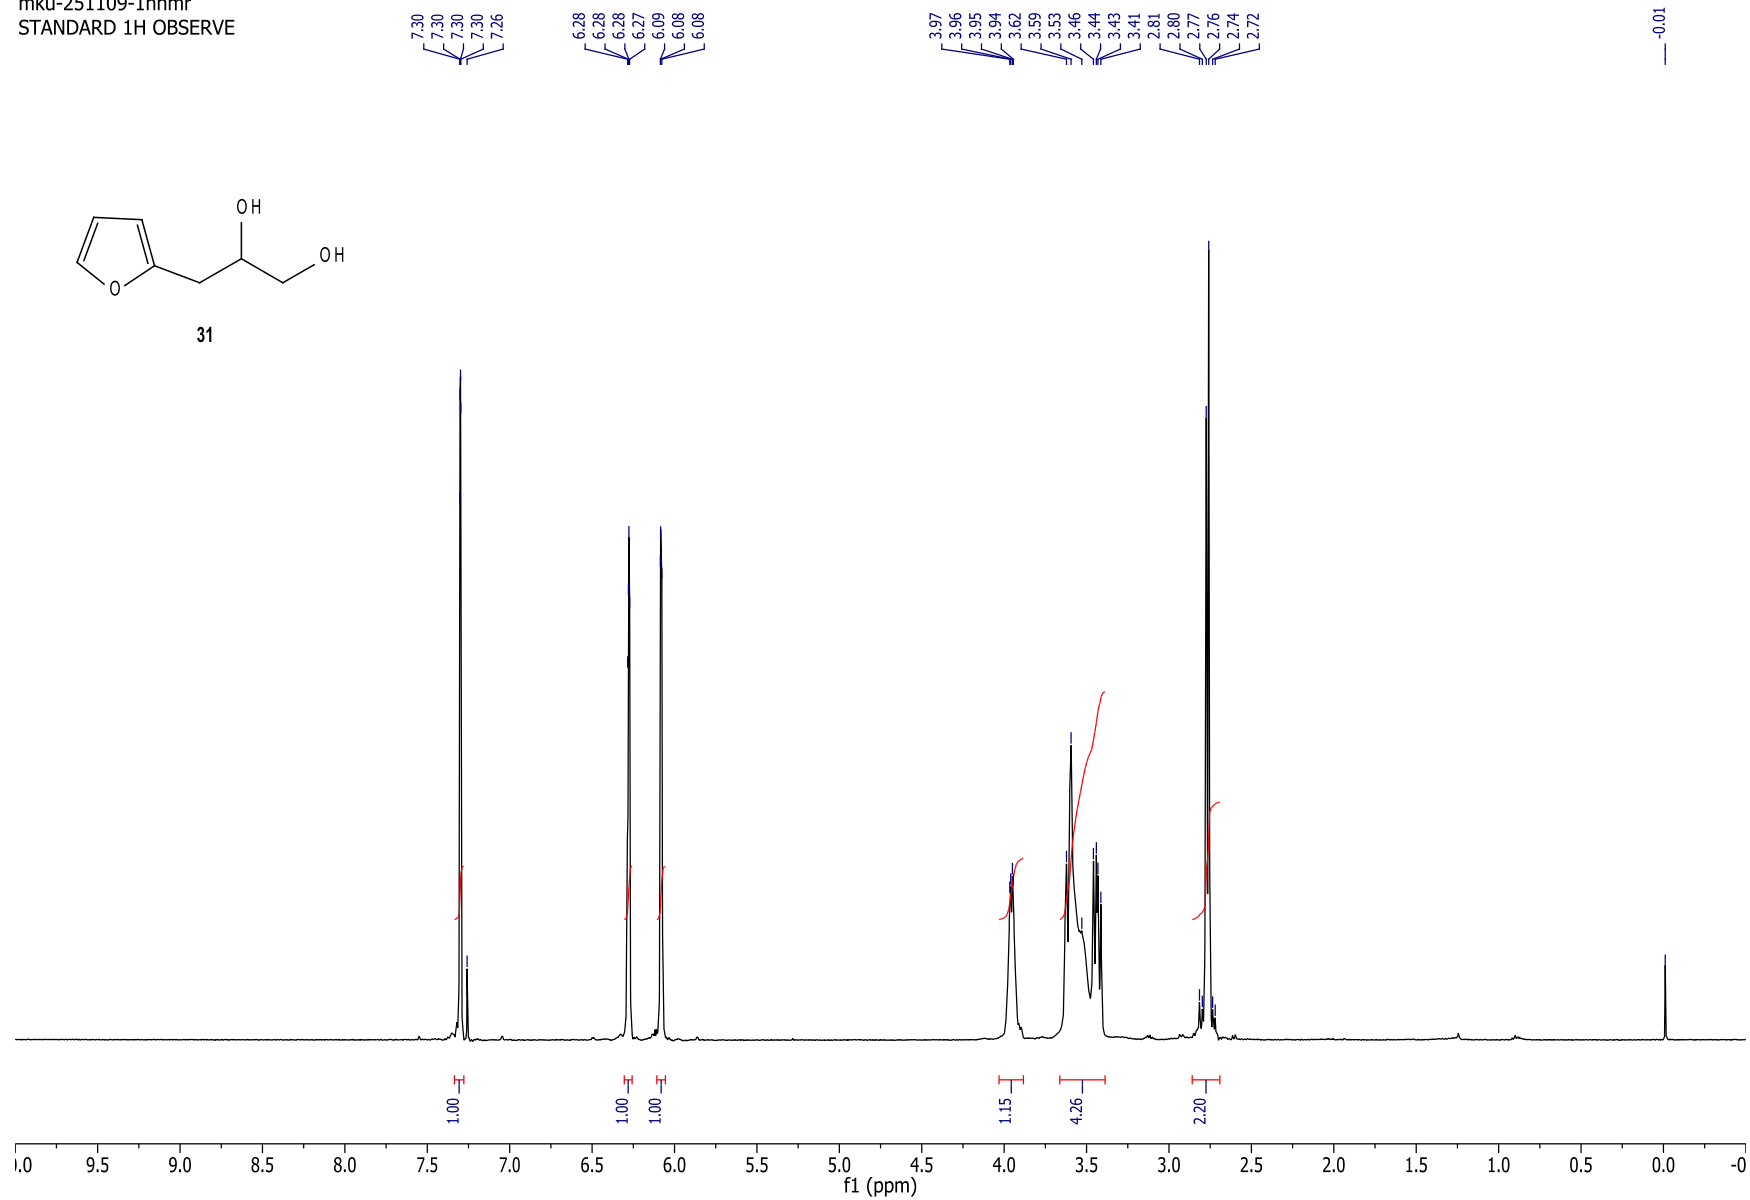

mku-251109-13cnmr  
13C OBSERVE

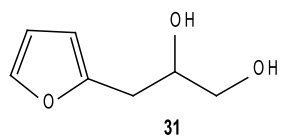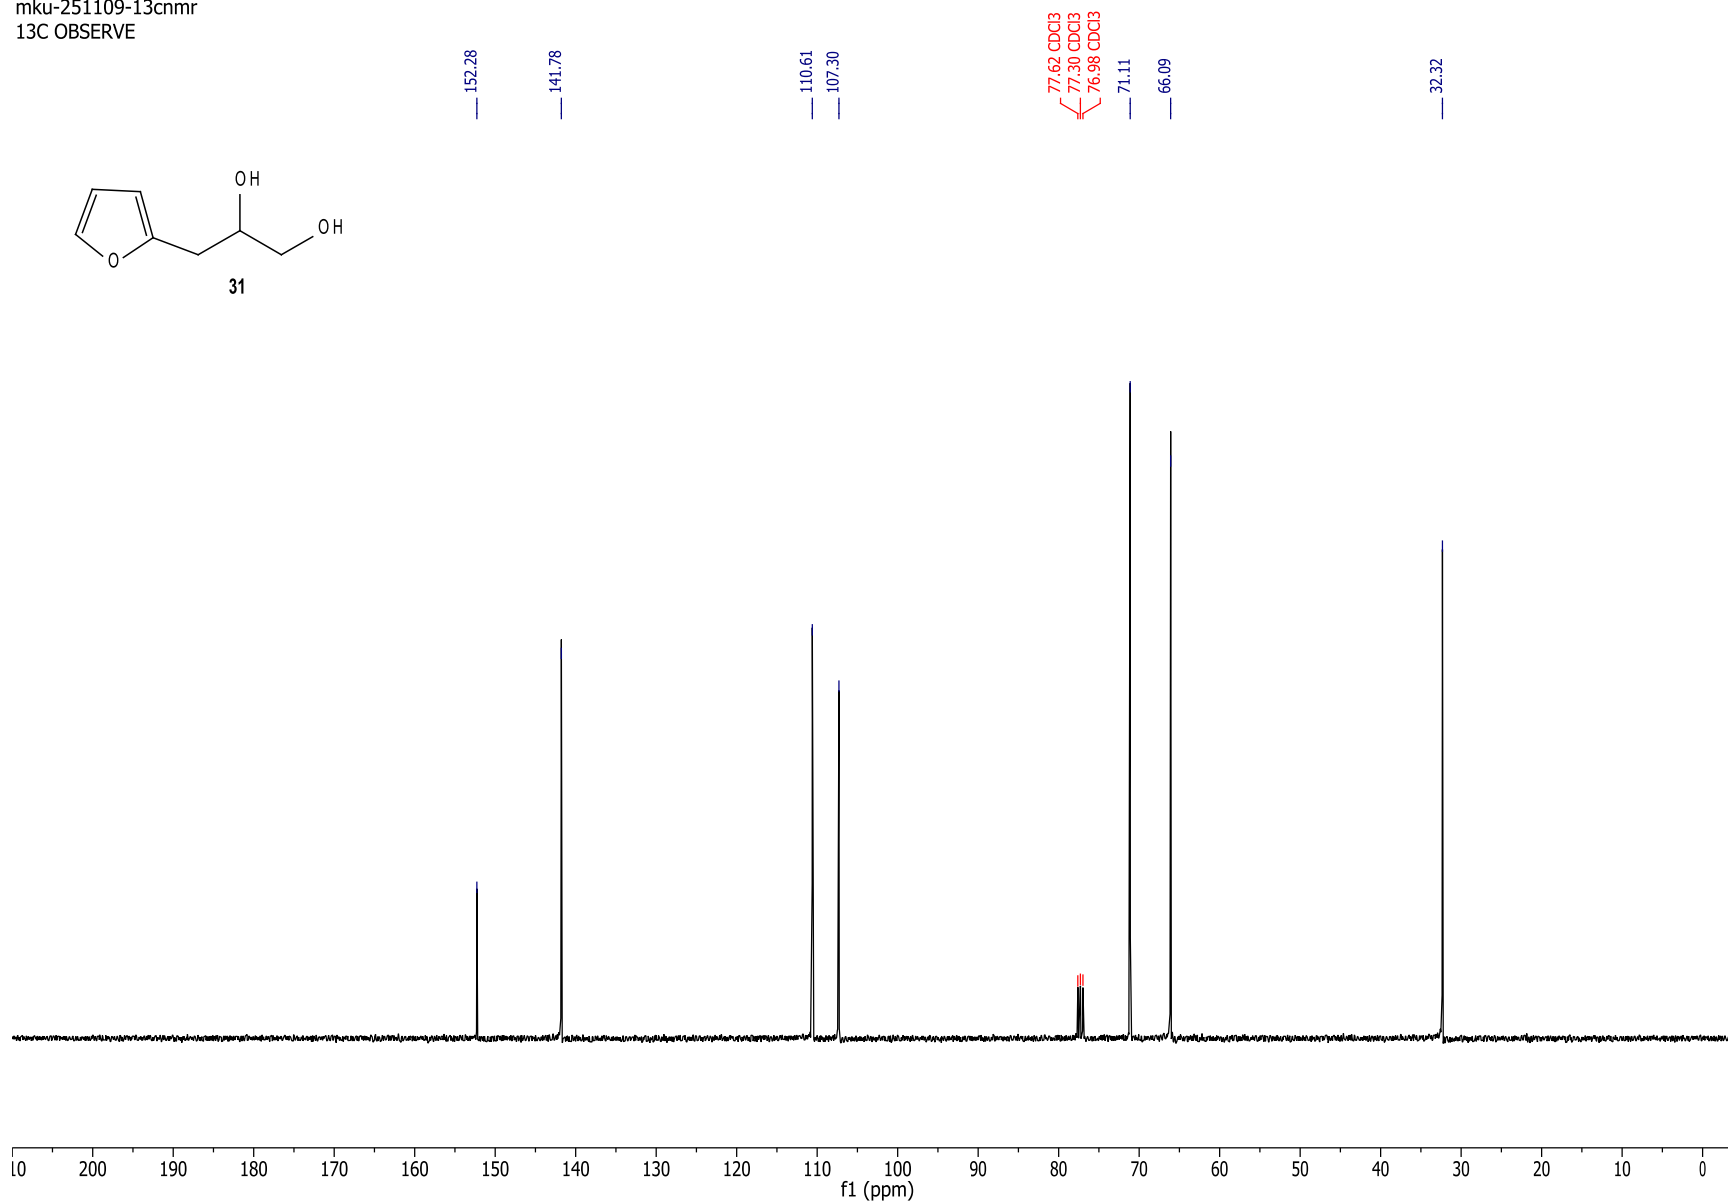

ras-142-2-1hnmr  
STANDARD 1H OBSERVE

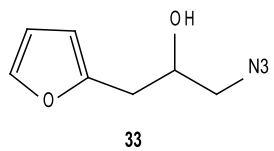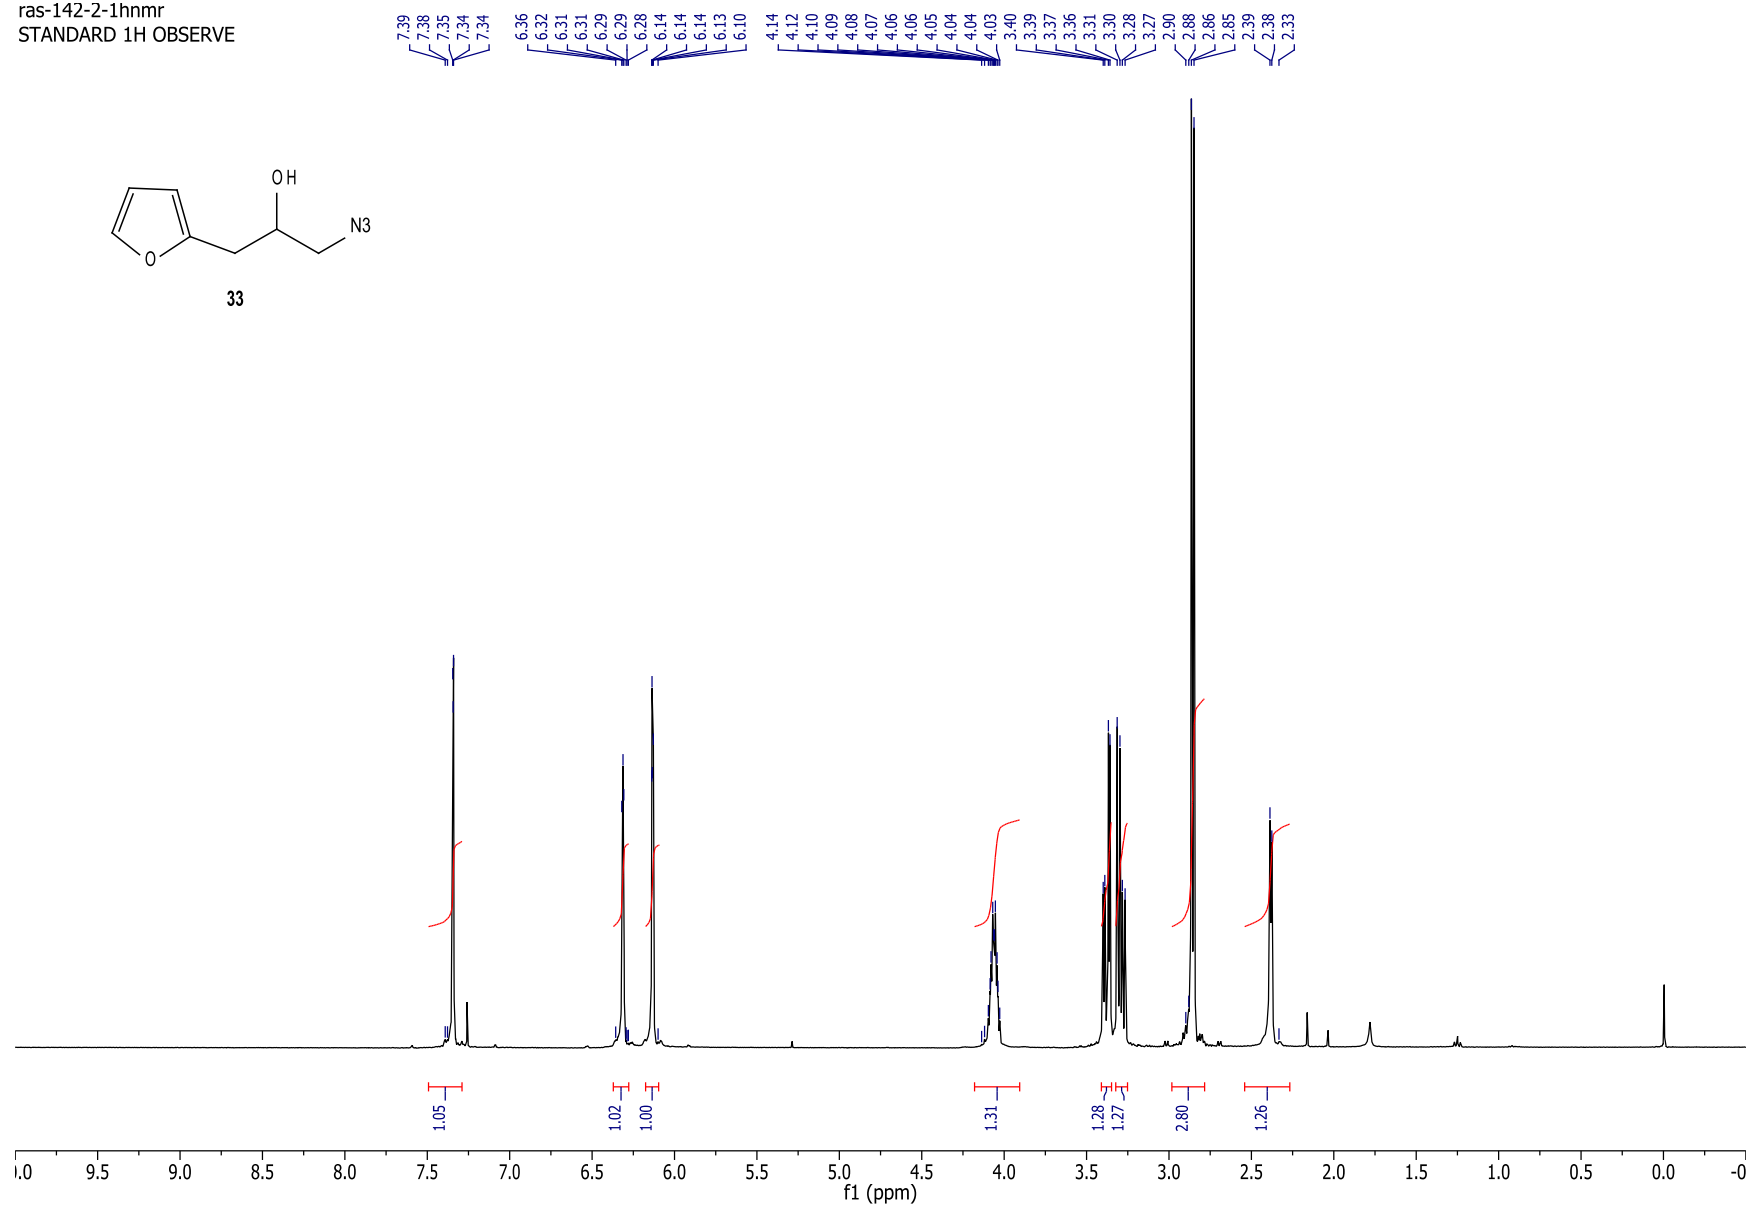

ras-142-2-13cnmr  
13C OBSERVE

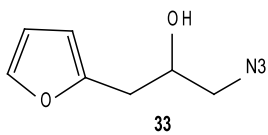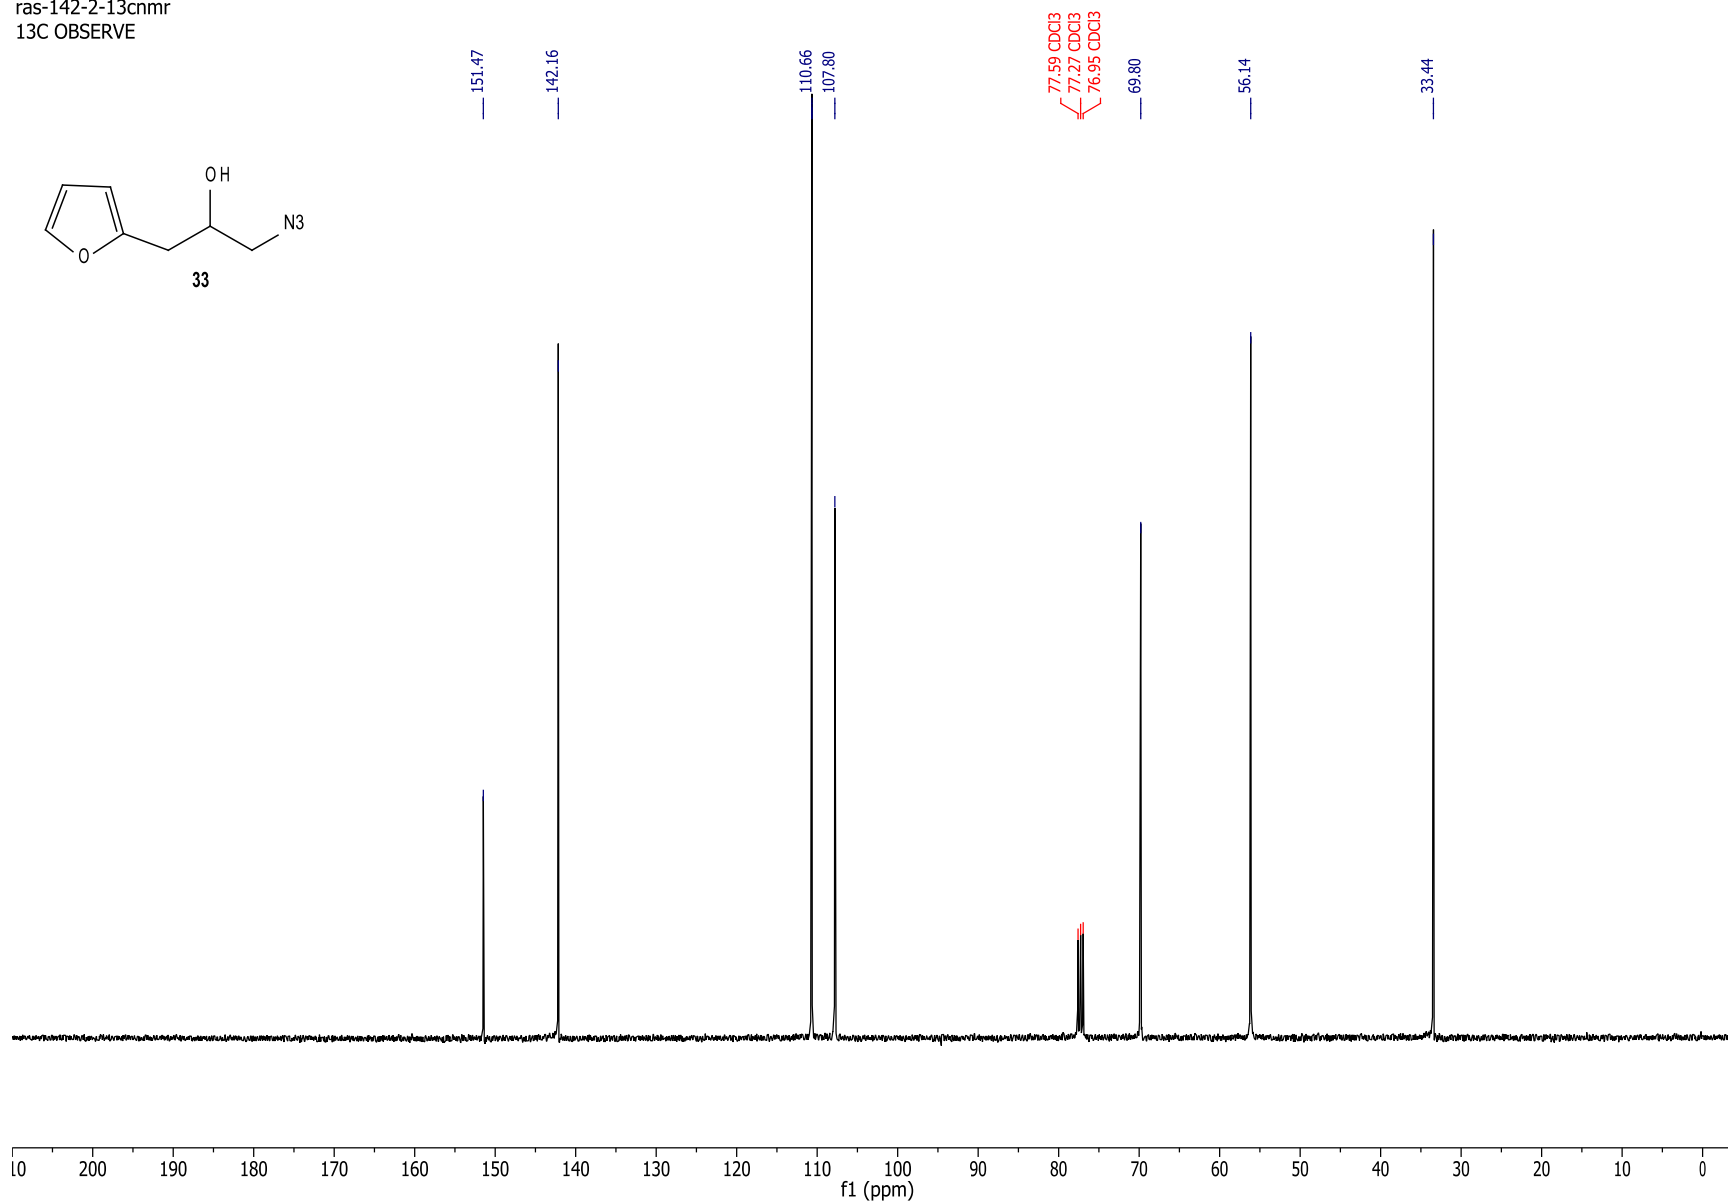

ras-290609-1hpmr  
STANDARD 1H-OBSERVE

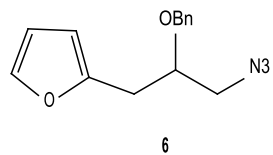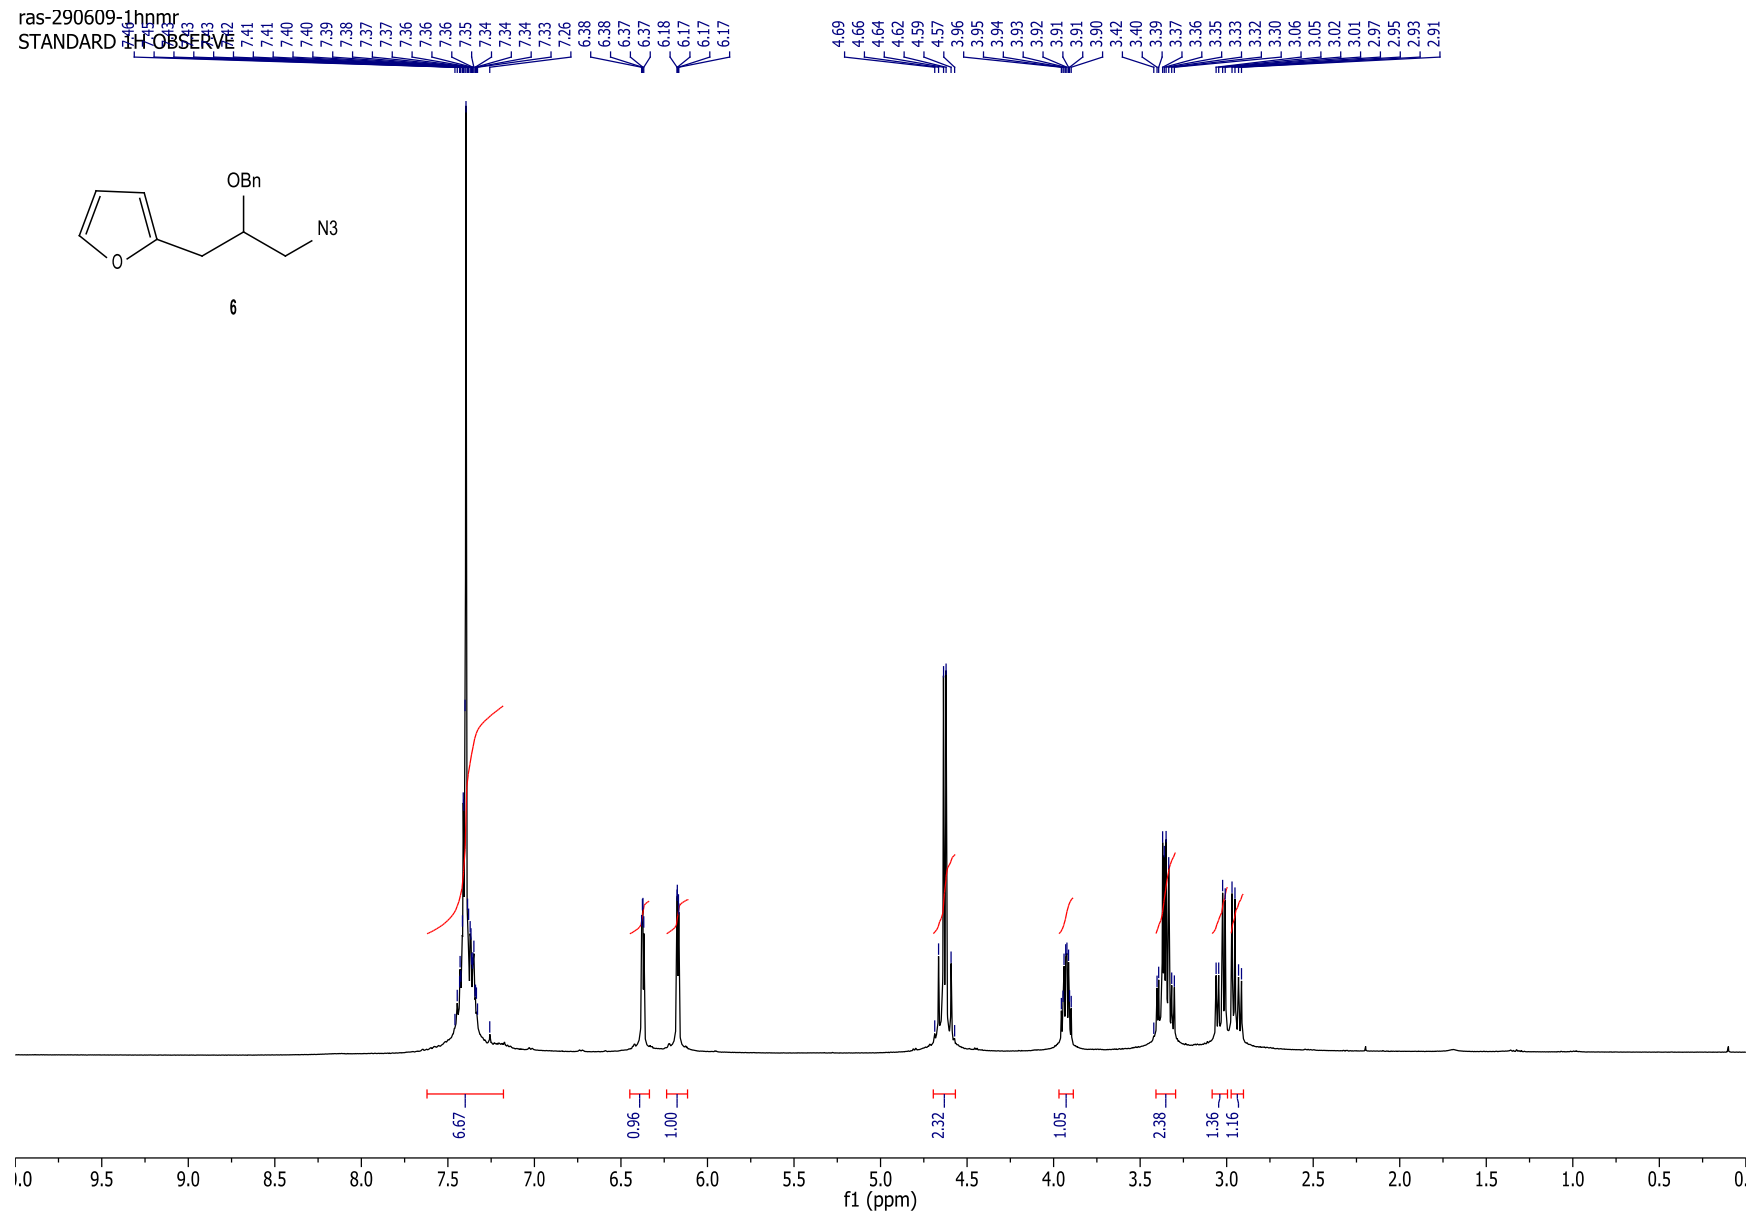

ras-290609-13cnmr  
13C OBSERVE

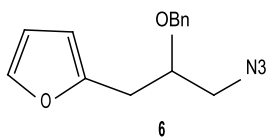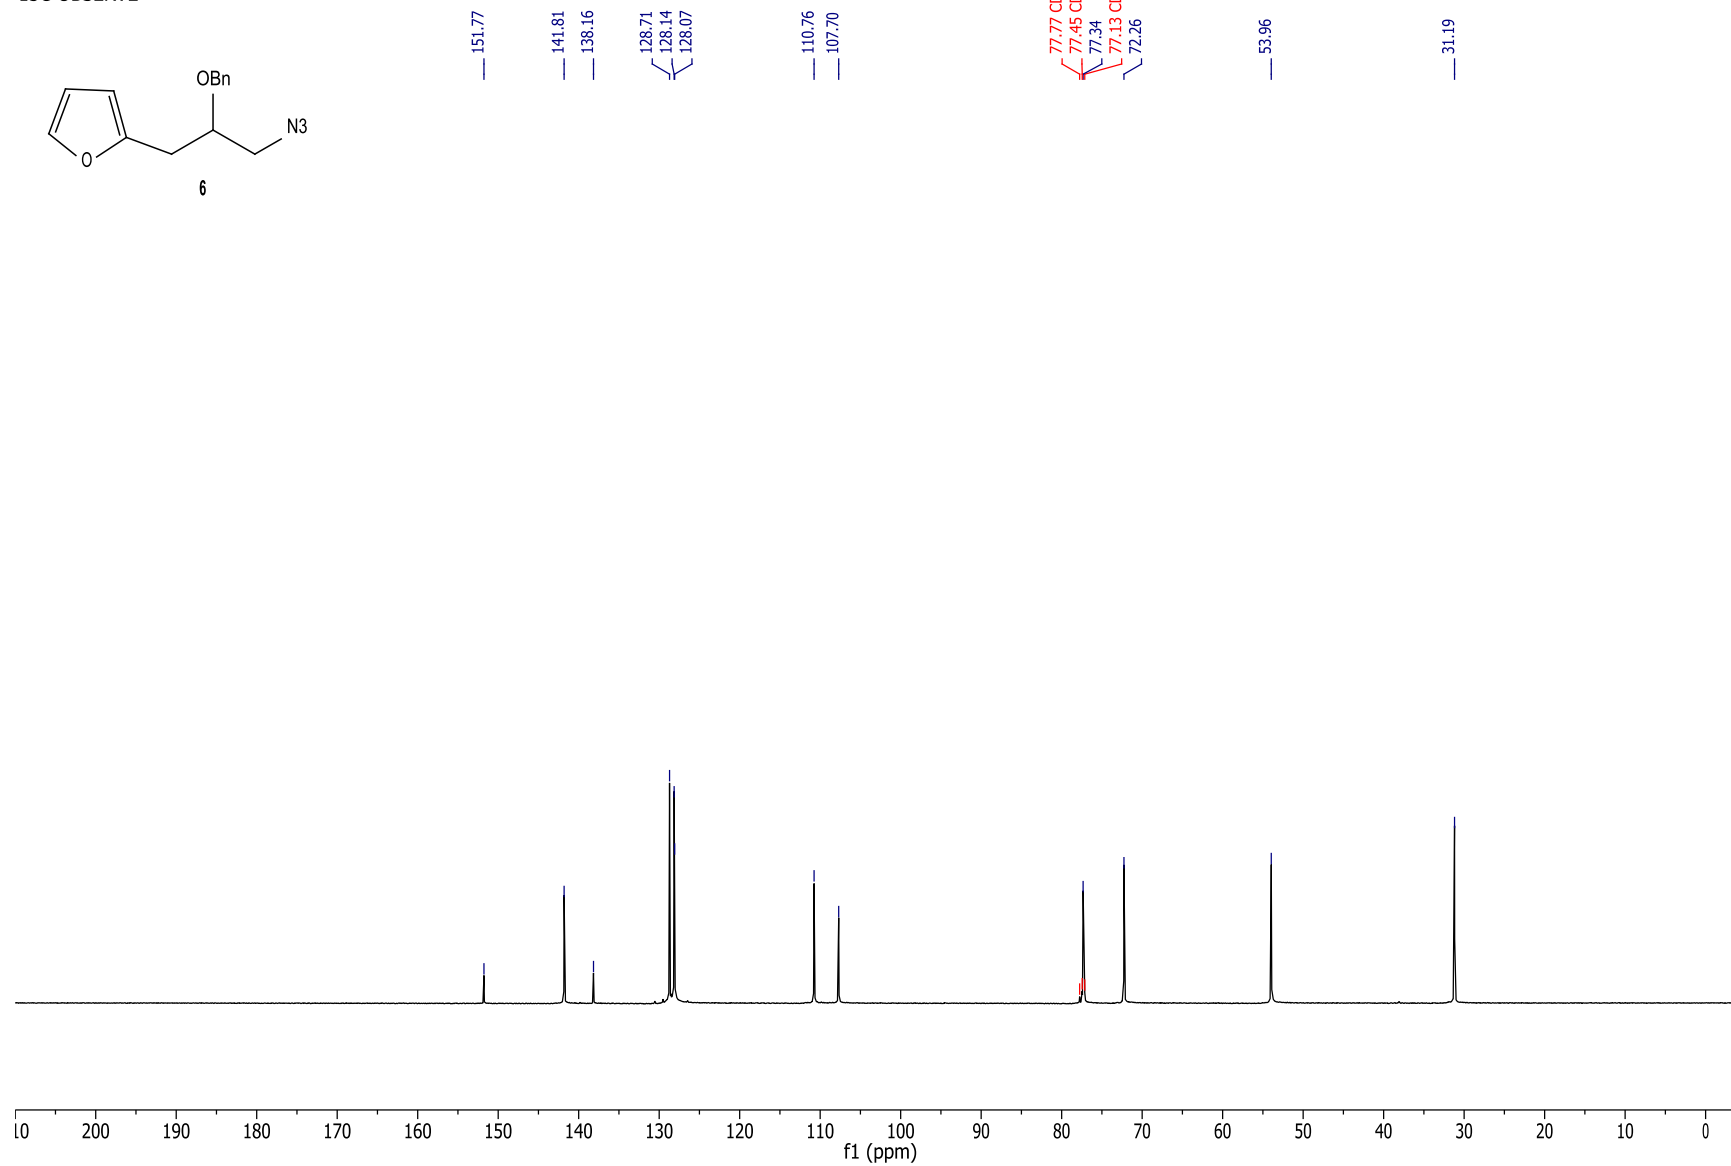

ean-070709-2-1hnmr  
STANDARD 1H OBSERVE

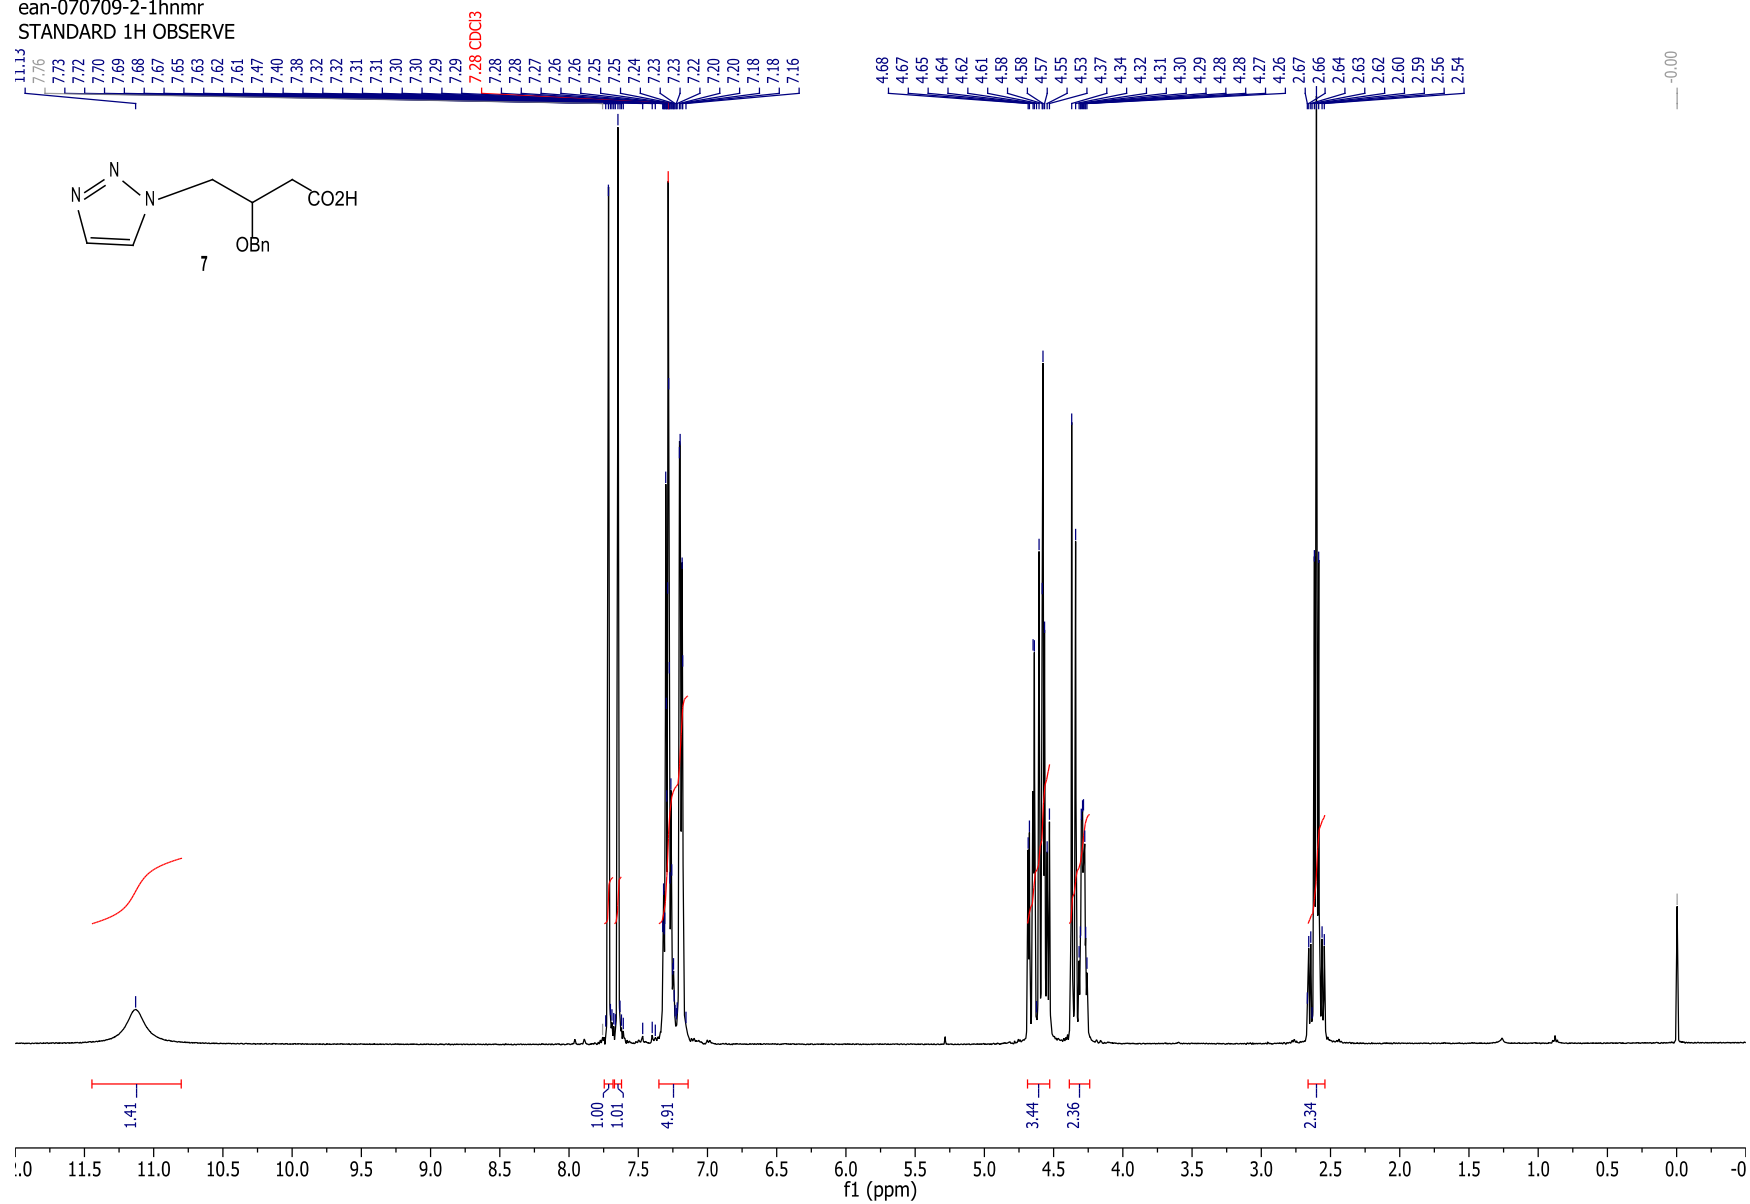

ras-070709-13cnmr  
13C OBSERVE

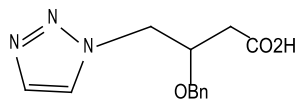

7

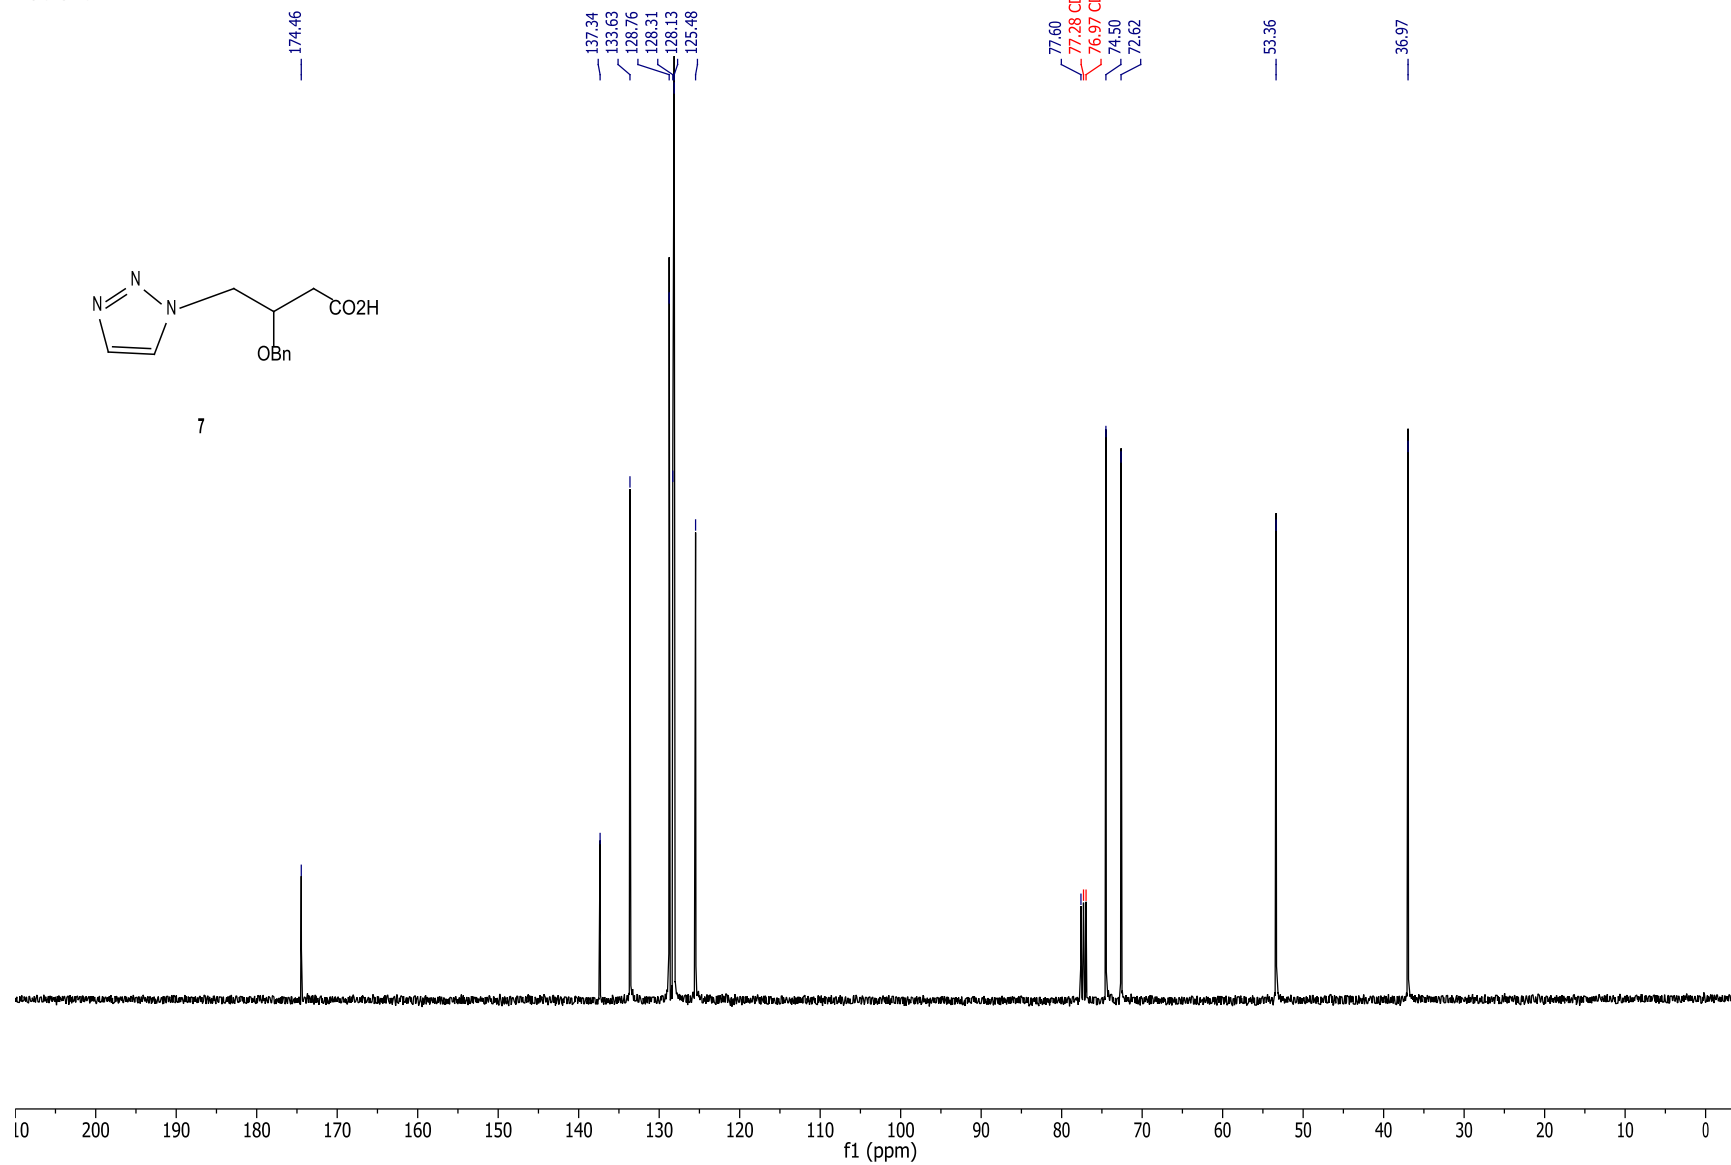



ras-070709-APT  
13C OBSERVE

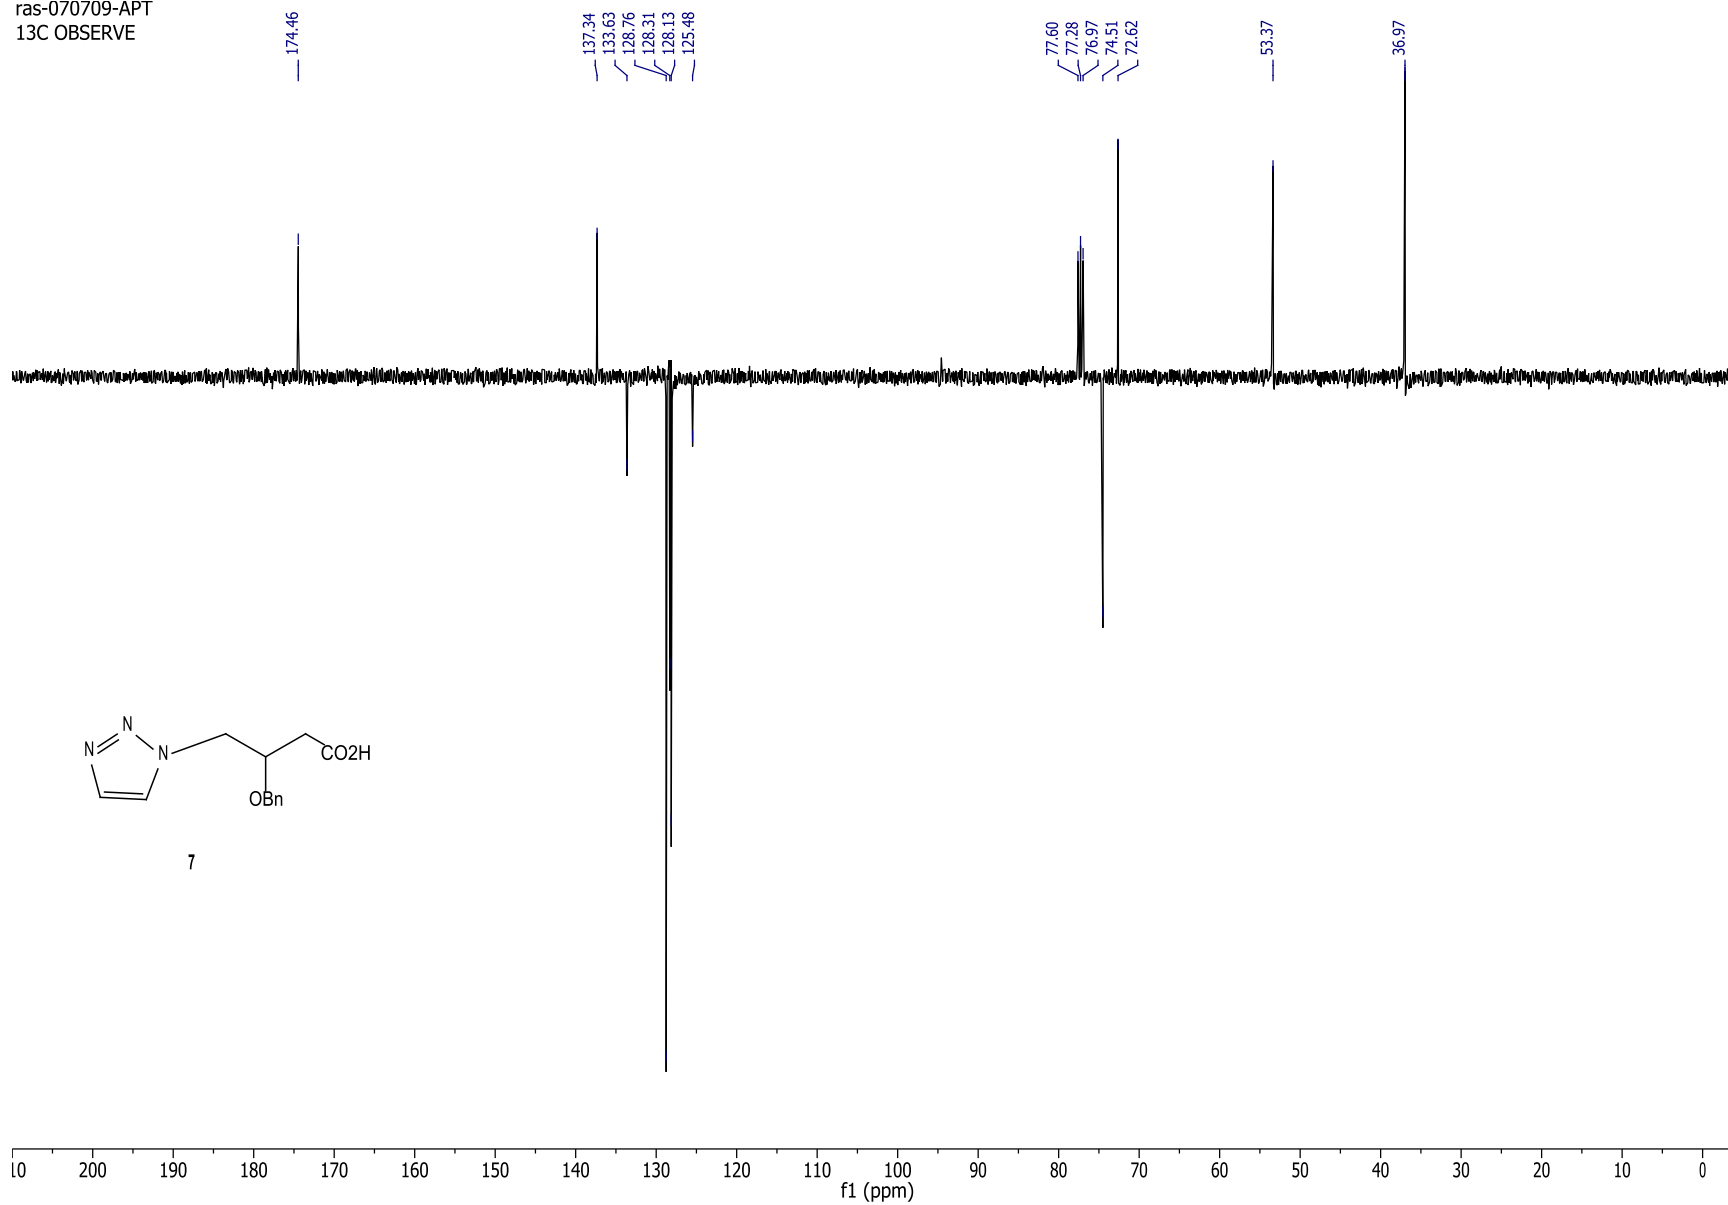

EA(215) NOESY  
~~5~~  
 S

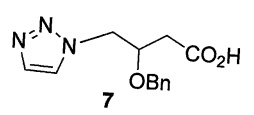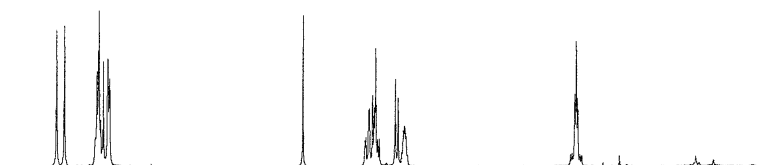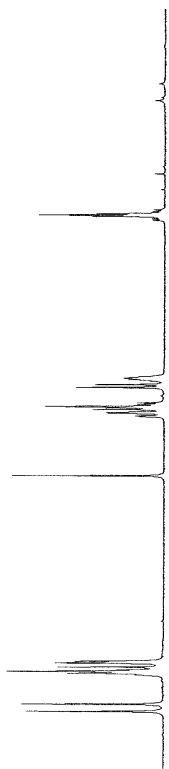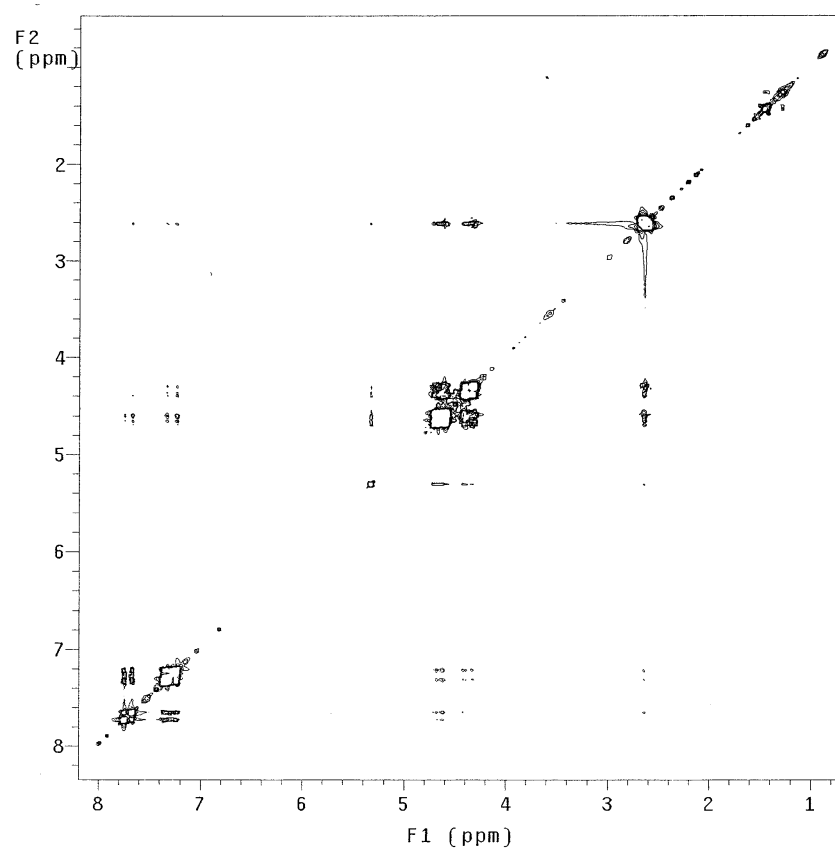

2A-715

S

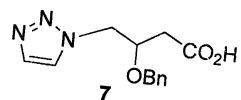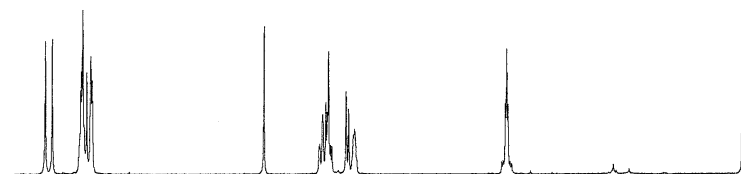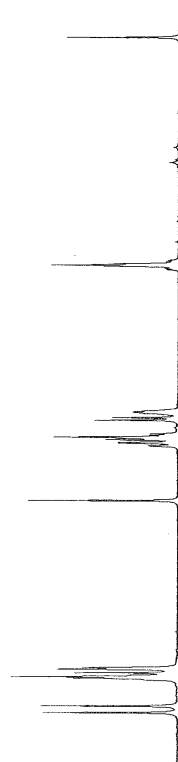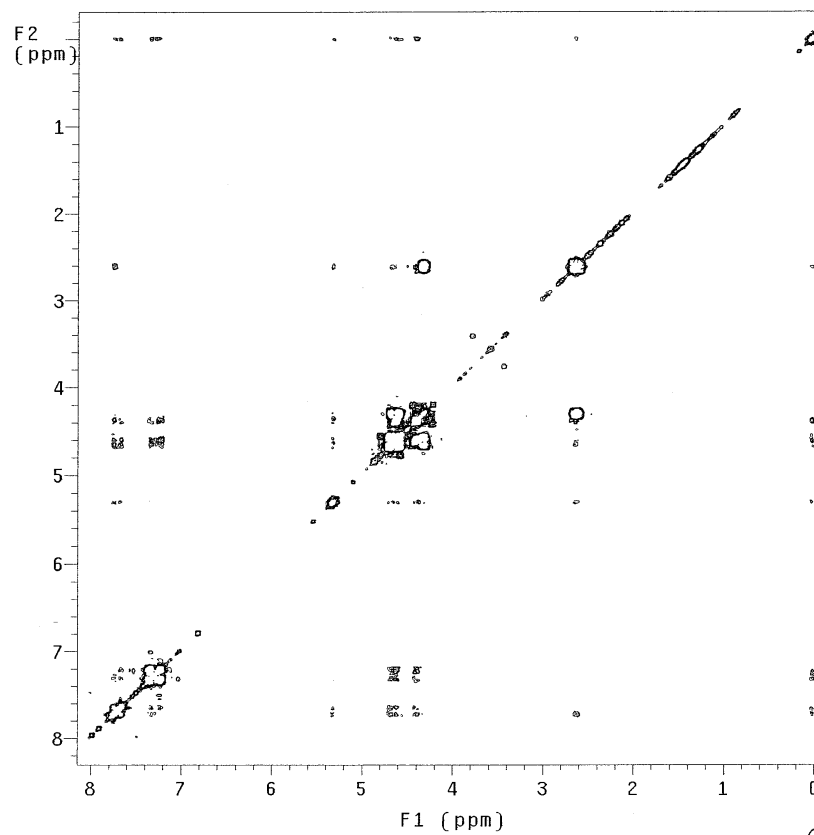

gcov 4

EA-15

S

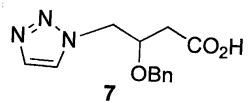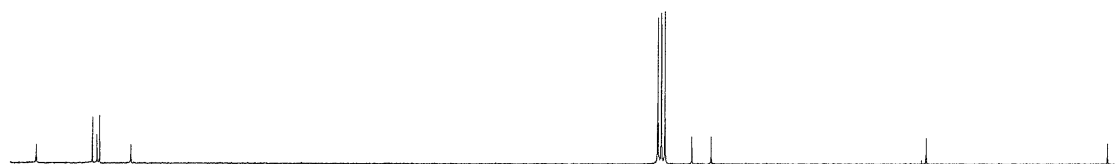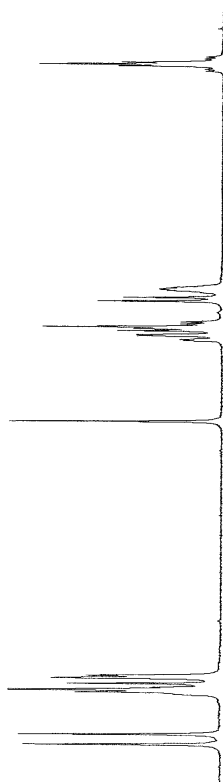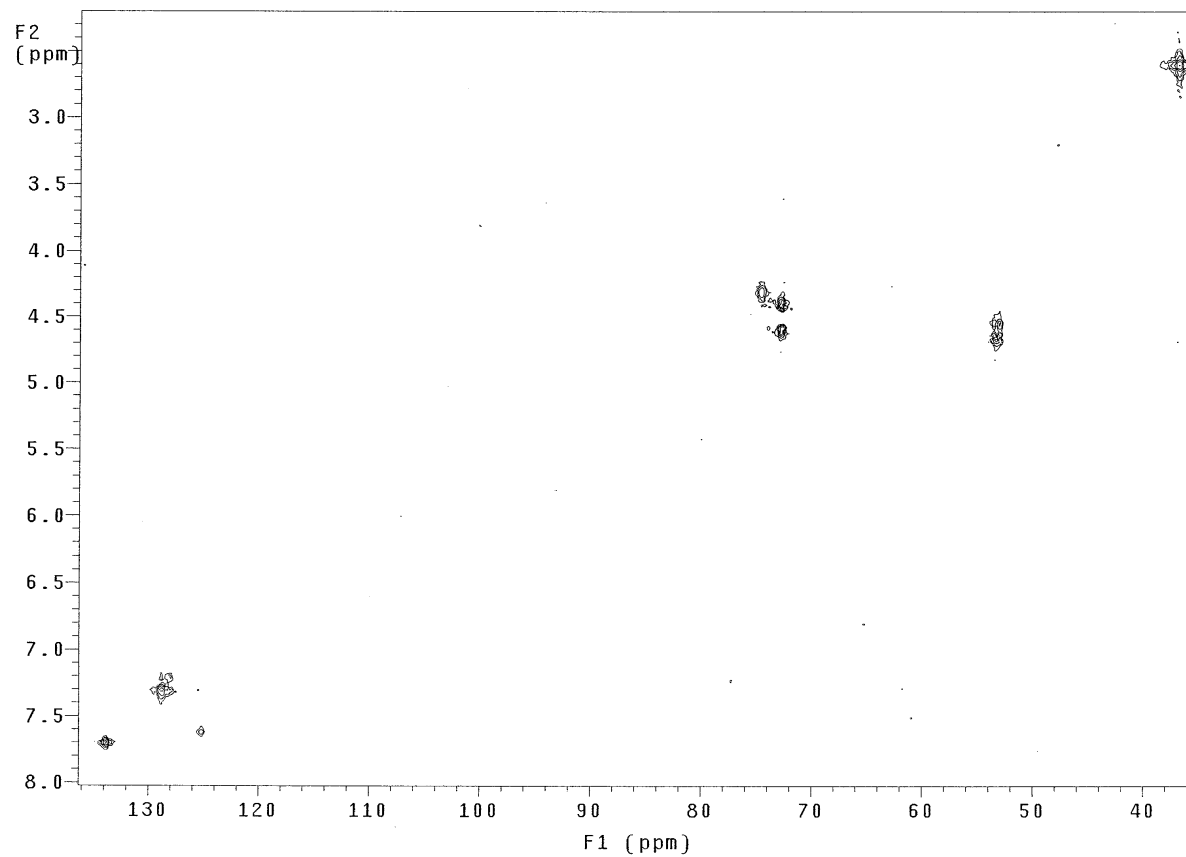

galmac

S EA-115

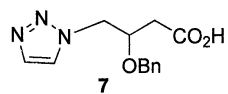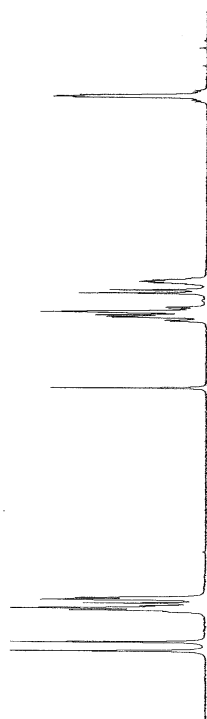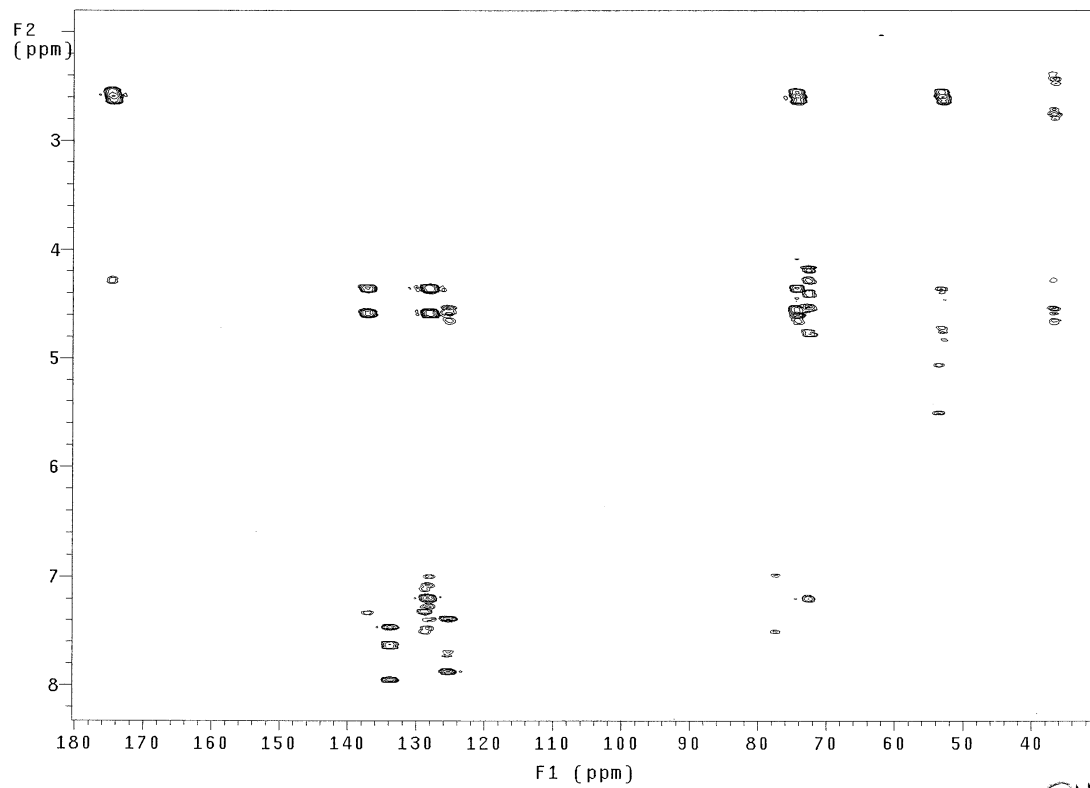

stimbe

mku-120509-1hnmr  
STANDARD 1H OBSERVE

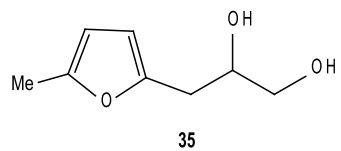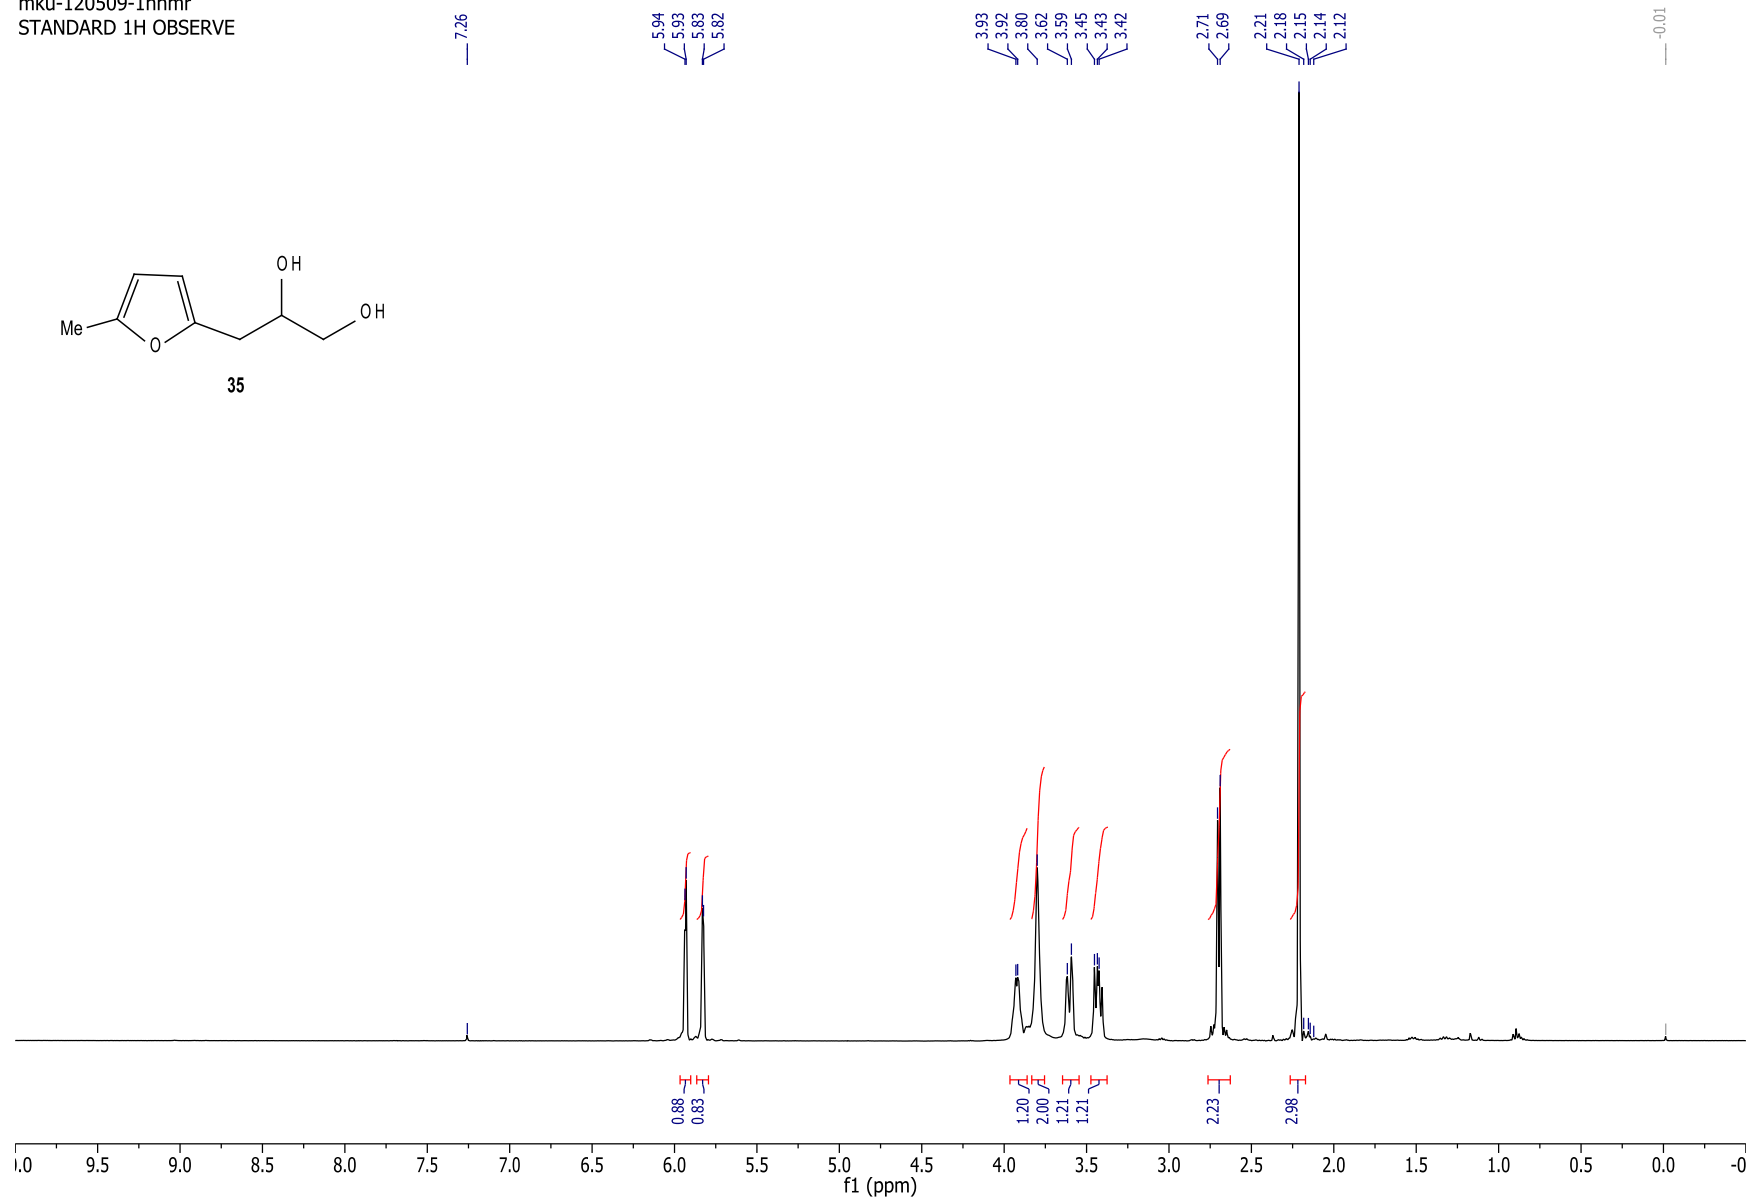

mku-120509-13cnmr  
13C OBSERVE

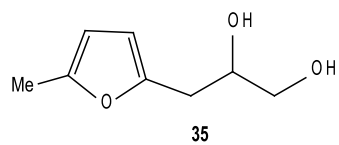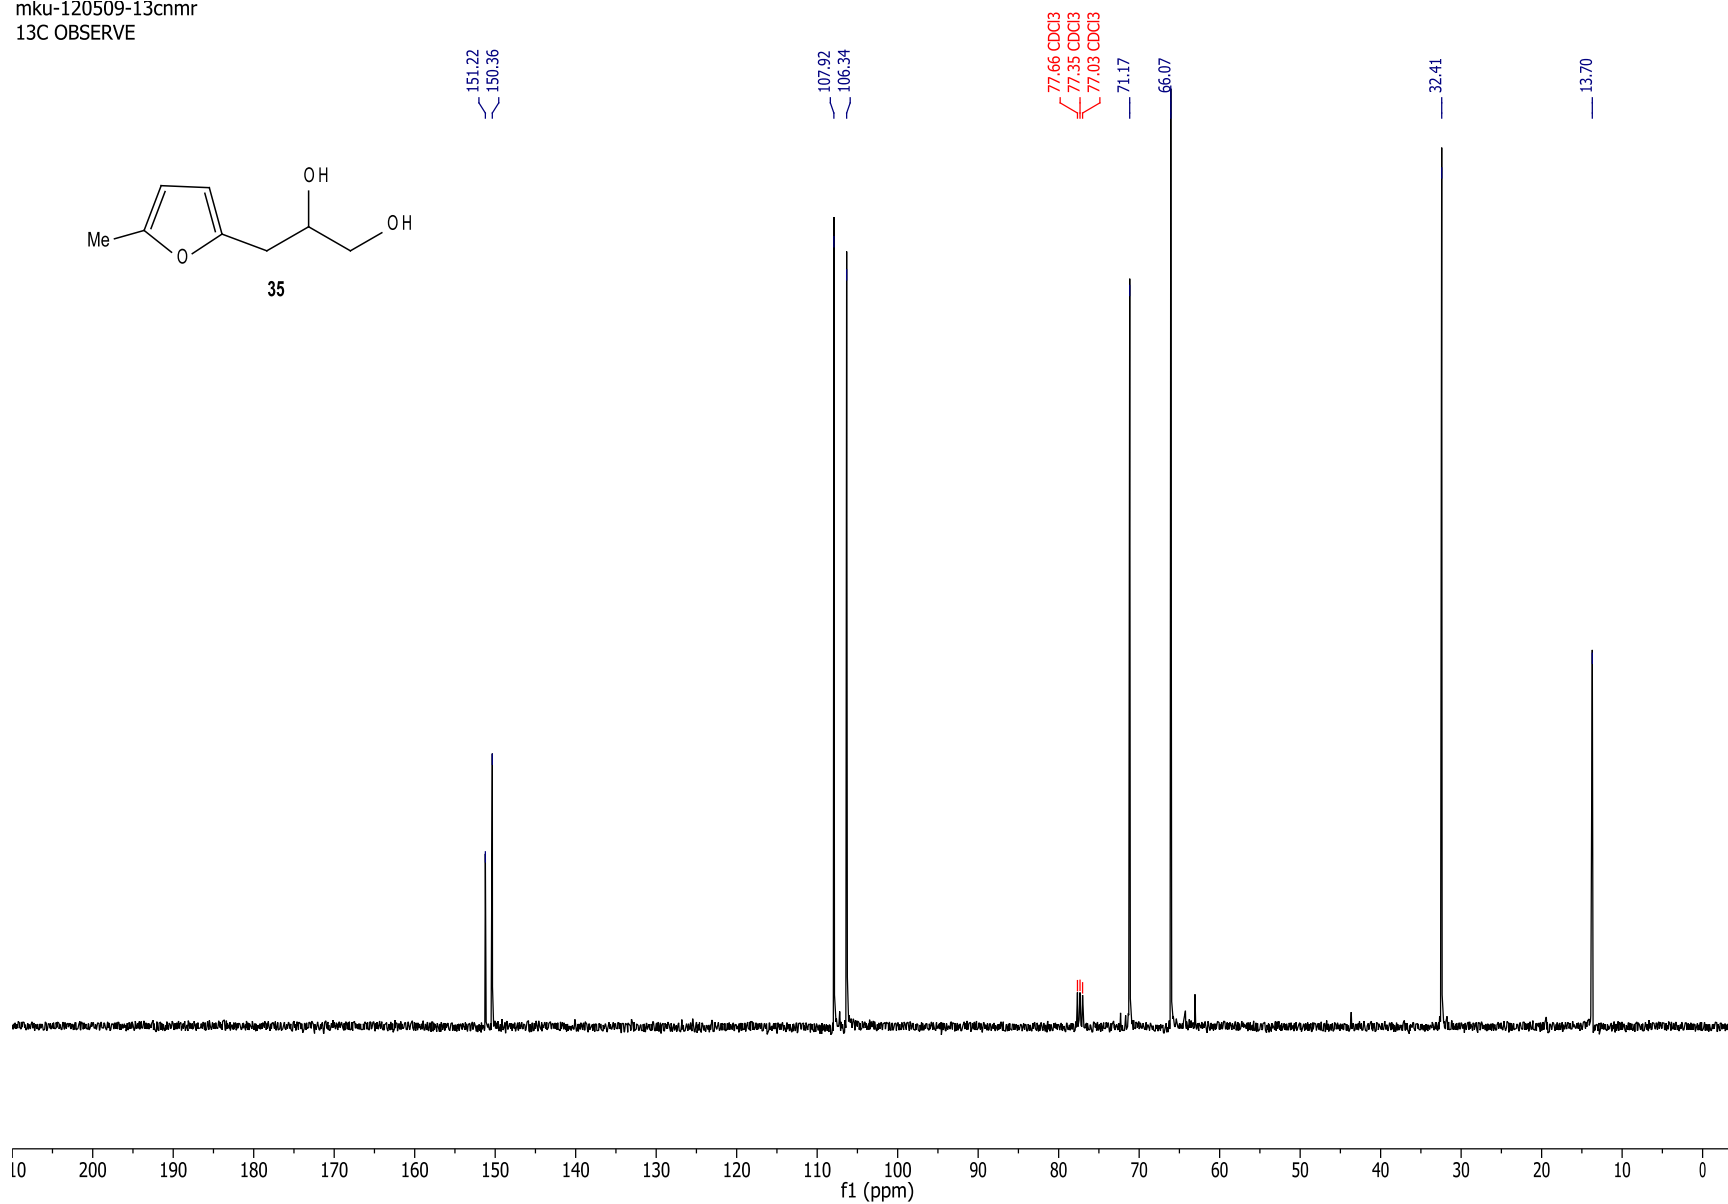

mku-140709-2-1hnmr  
STANDARD 1H OBSERVE

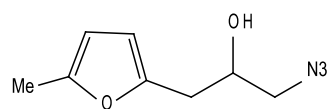

37

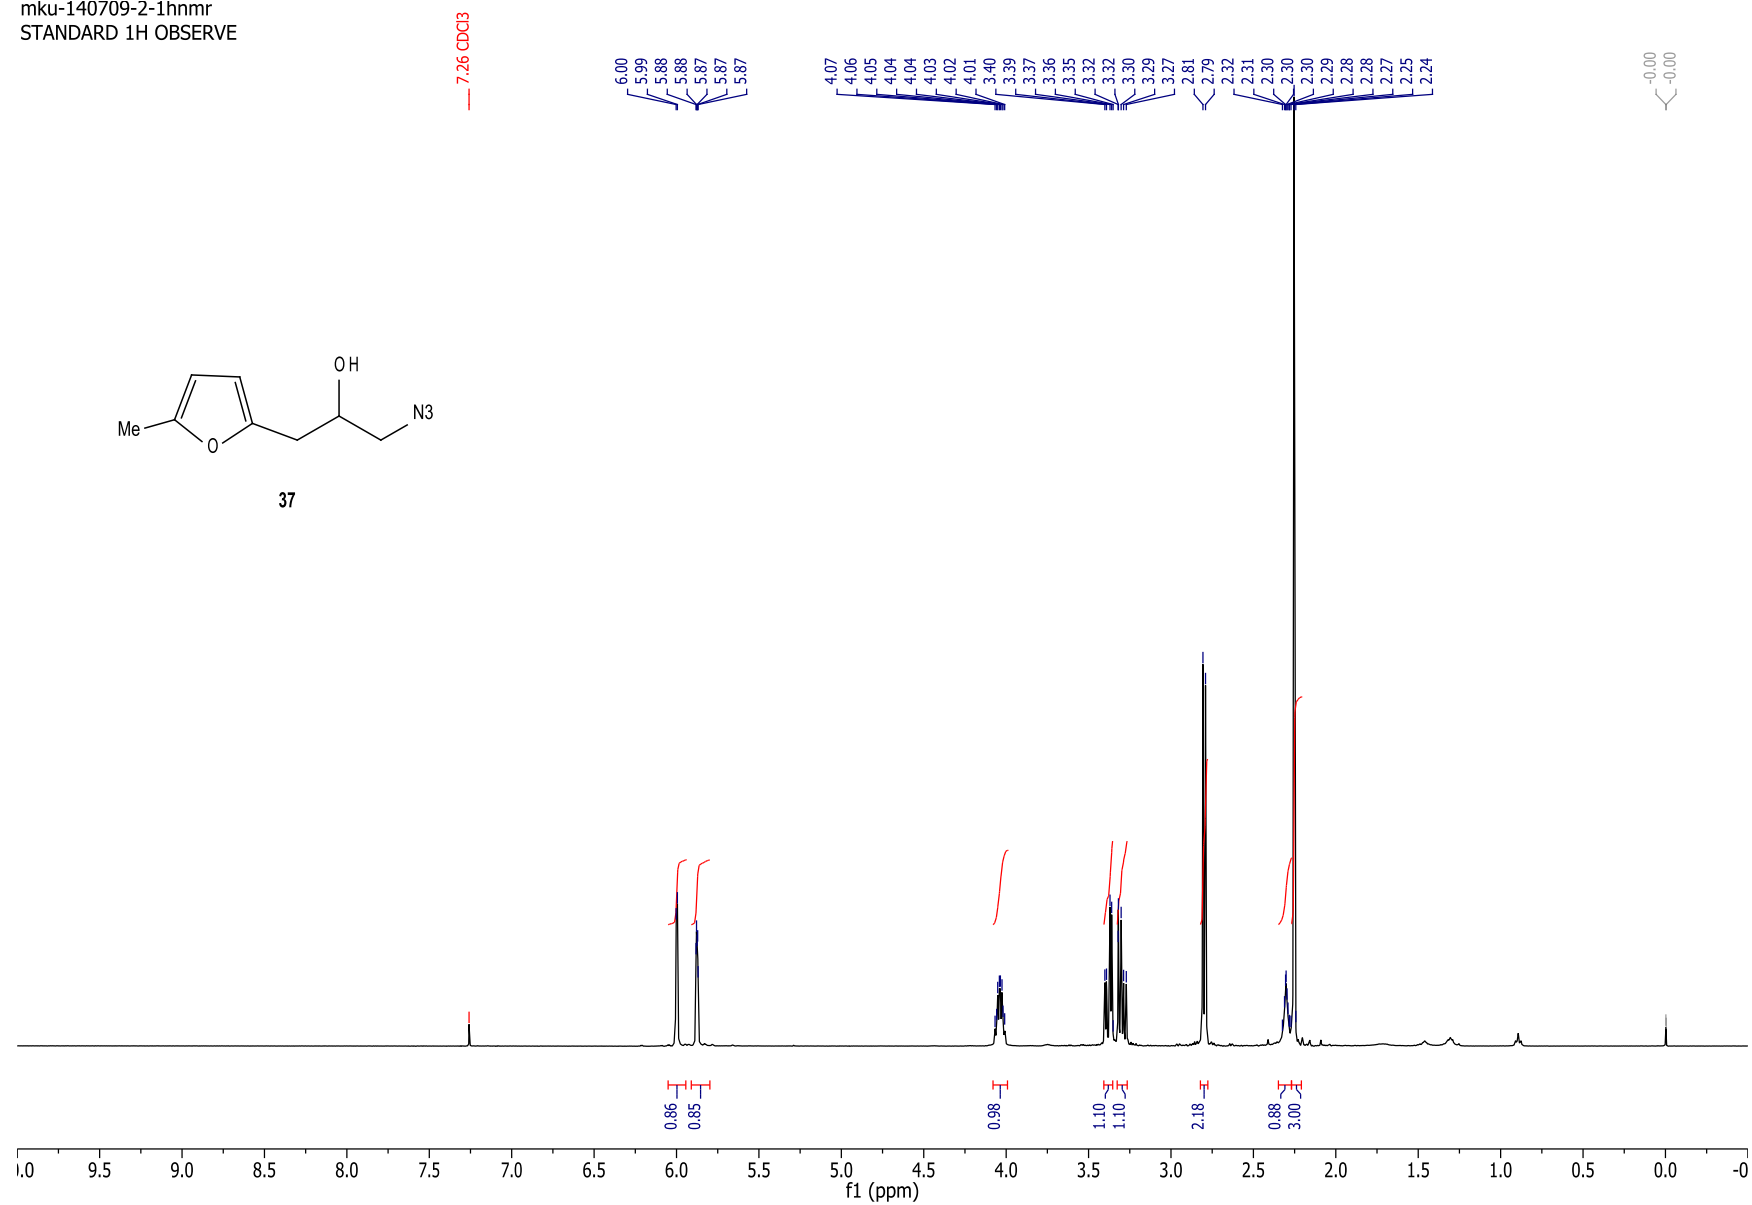



mku-140709-2-13cnmr  
13C OBSERVE

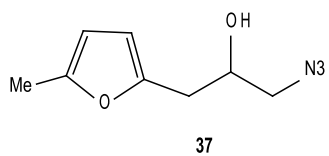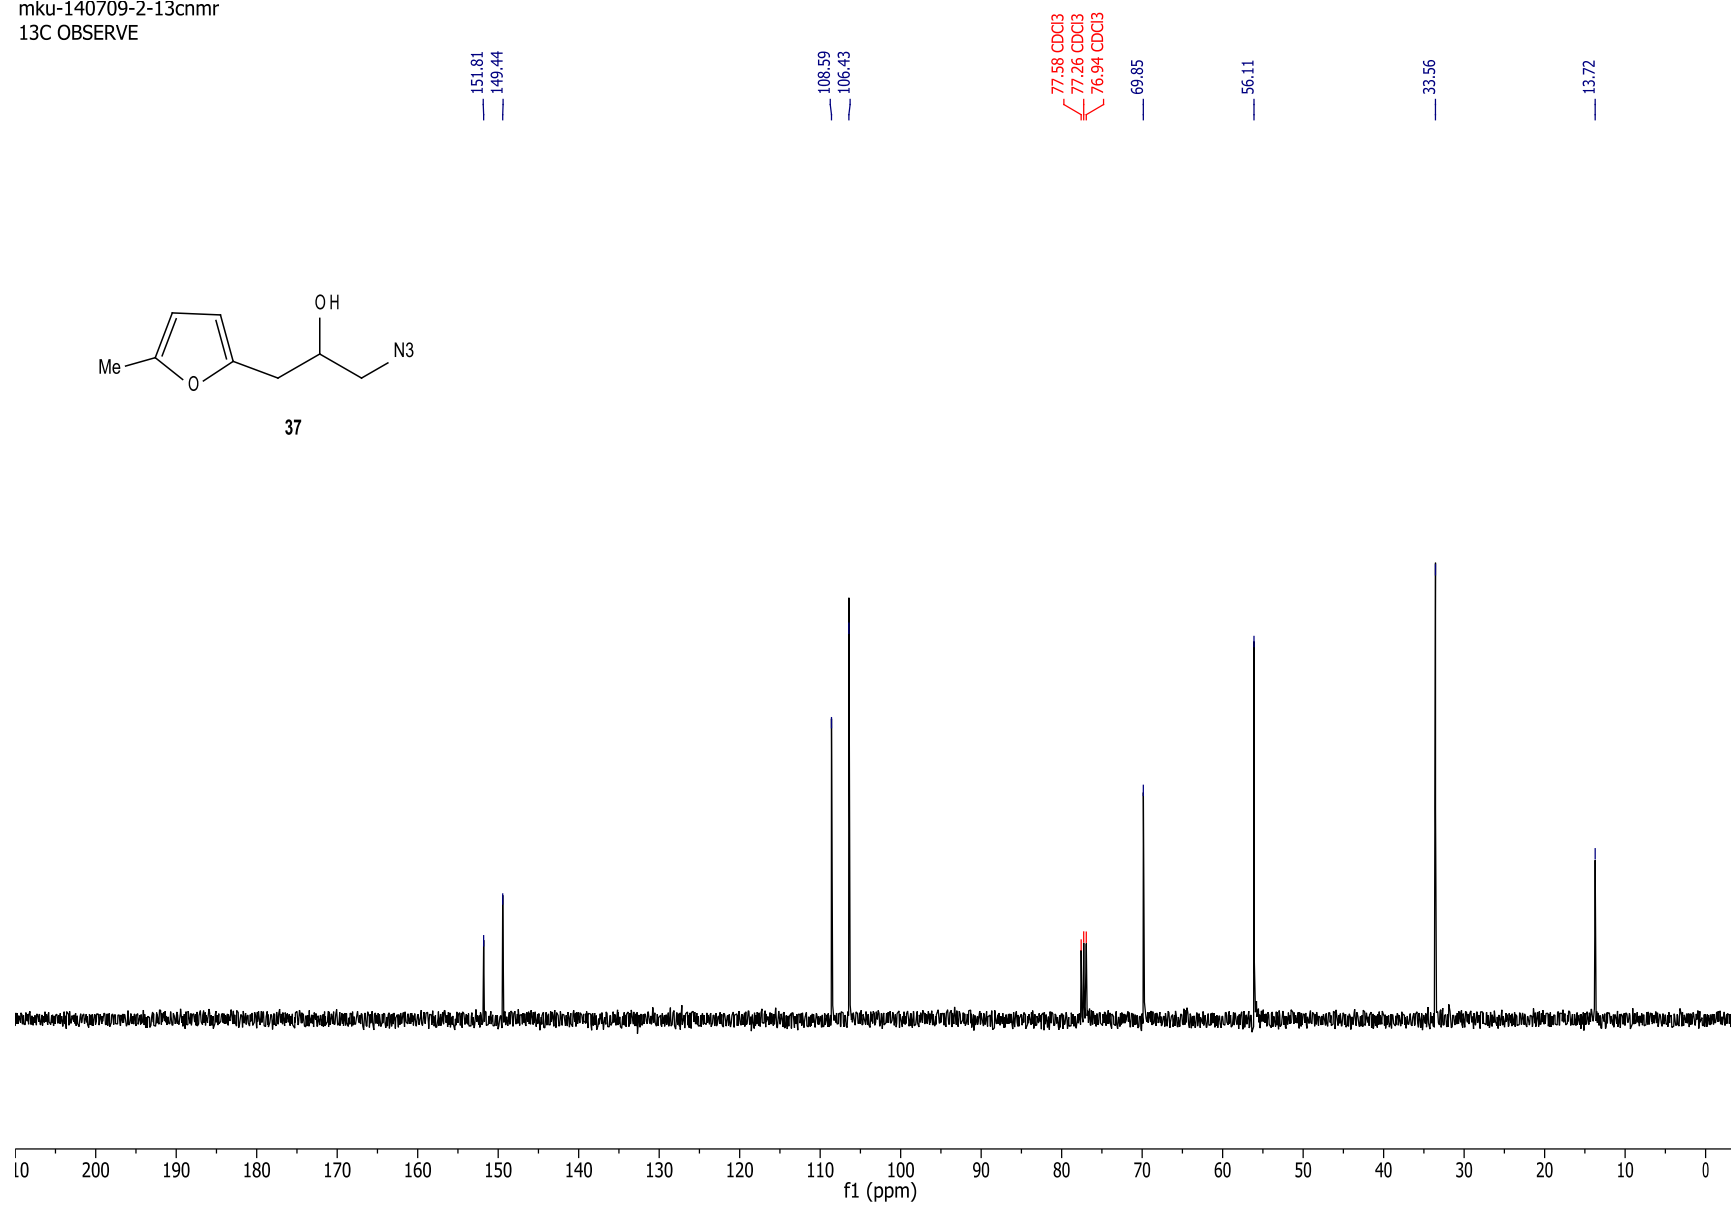

mku-140709-1hnmr  
STANDARD 1H OBSERVE

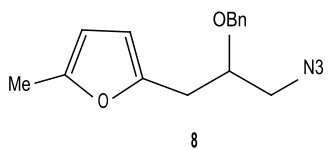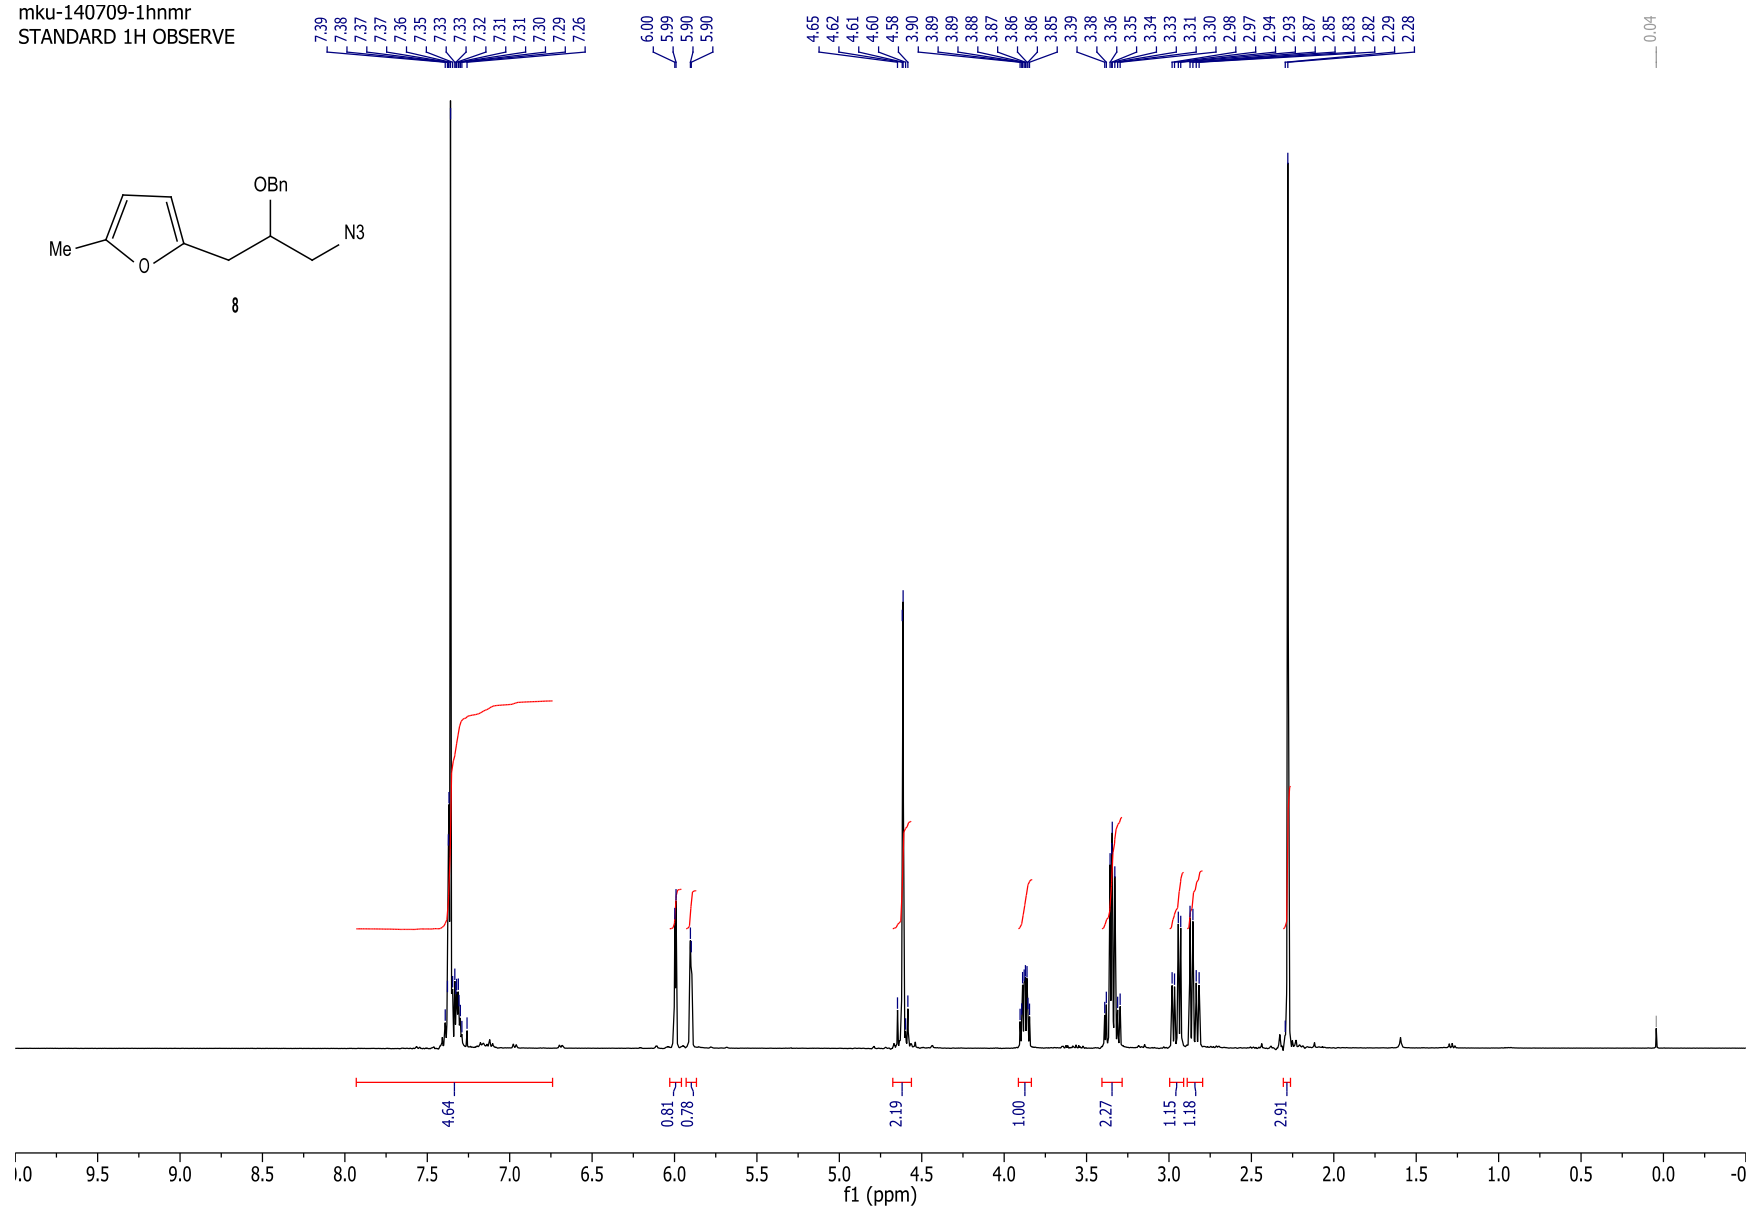

<sup>13</sup>C OBSERVE

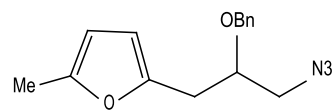

8

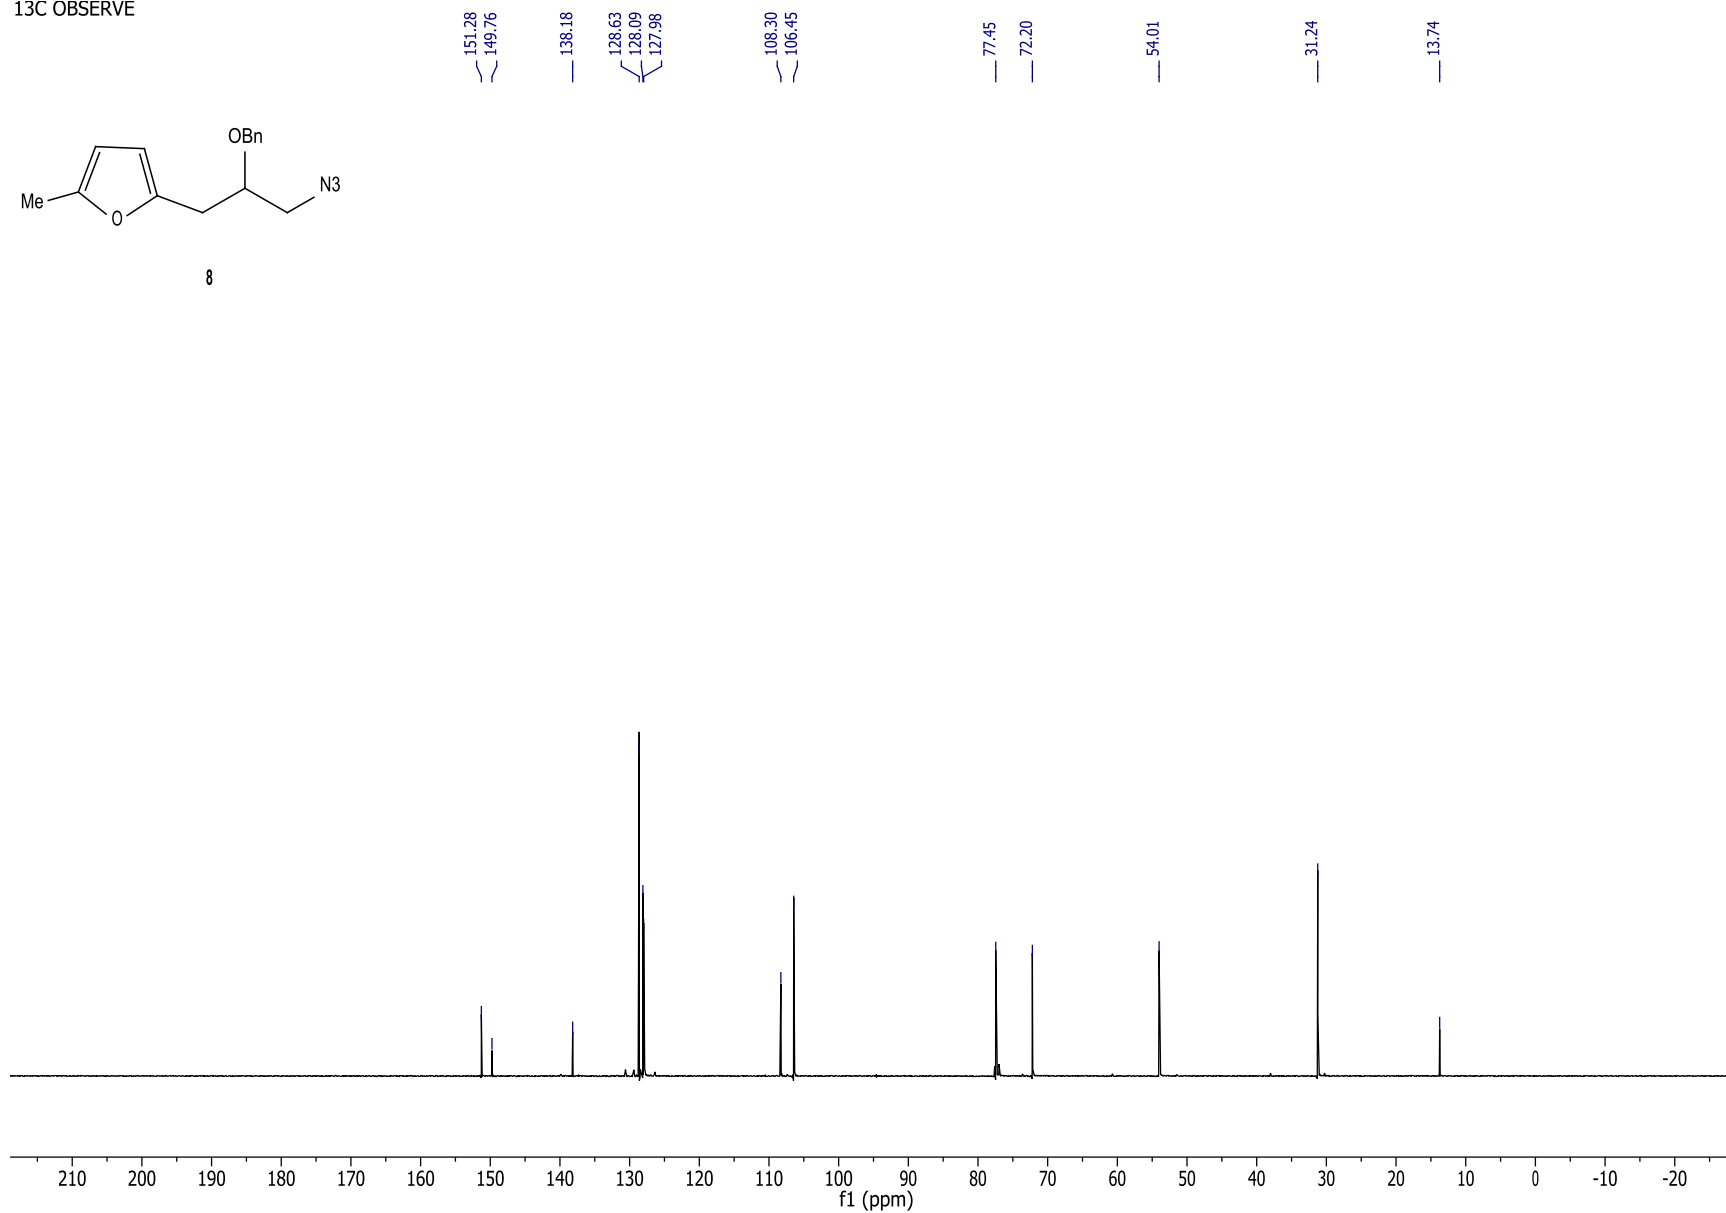

mku-410-1hnmr  
STANDARD 1H OBSERVE

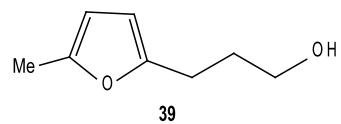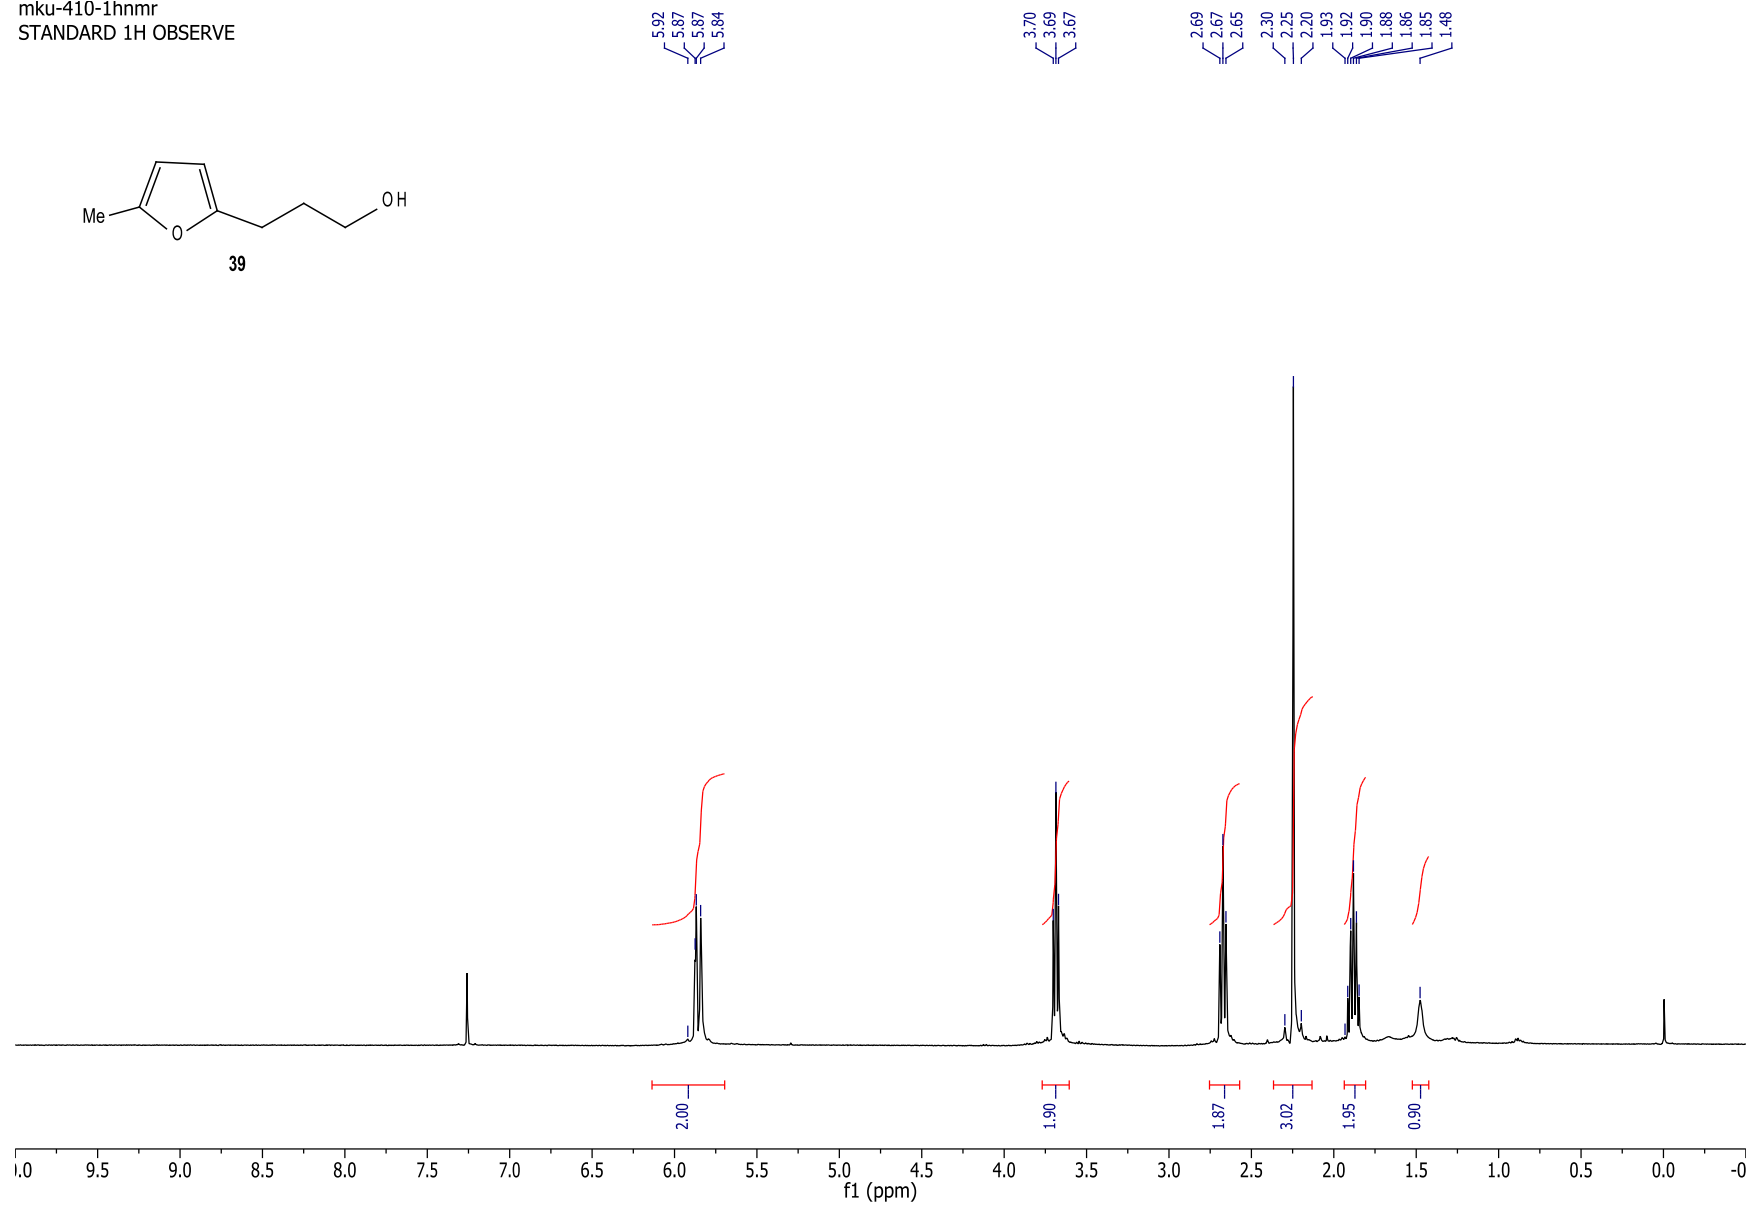

mku-410-13cnmr  
13C OBSERVE

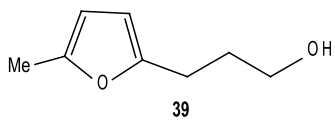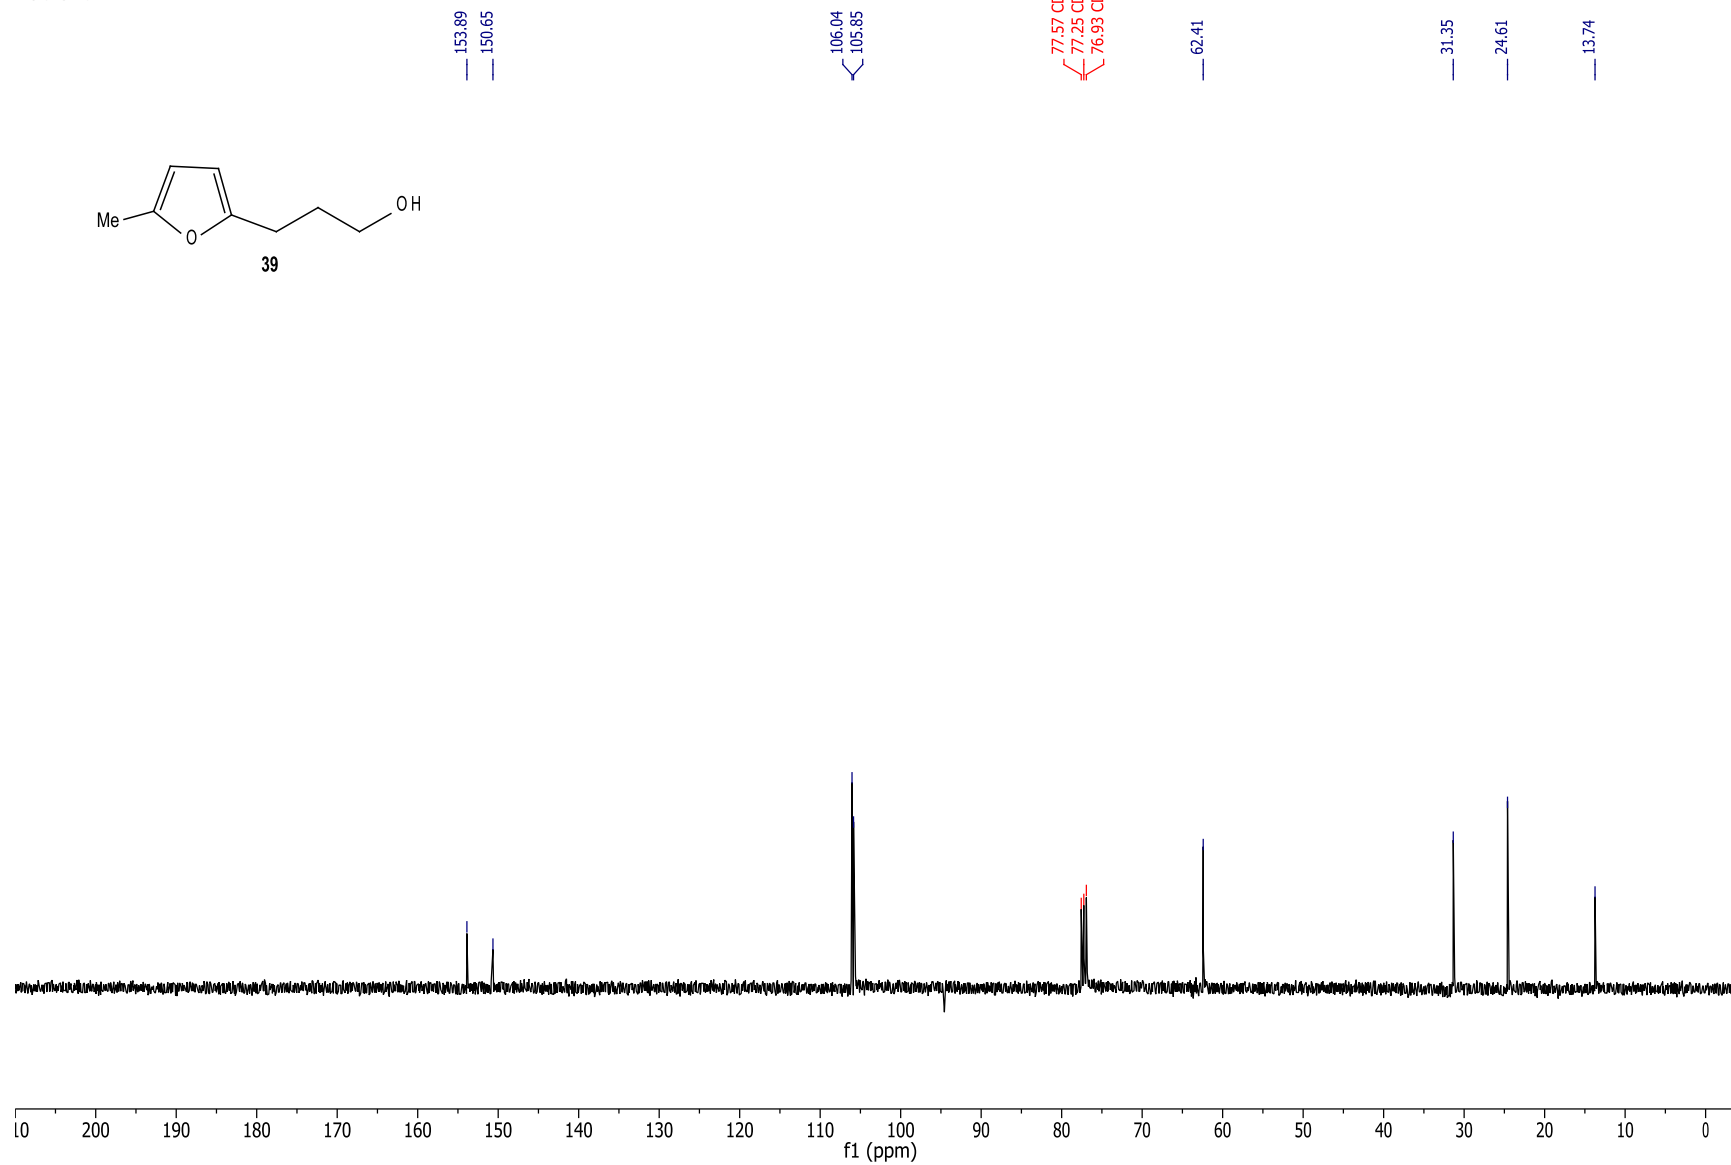

mku-161210-1hnmr  
STANDARD 1H OBSERVE

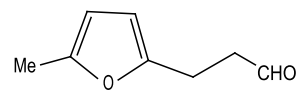

40

5.87  
5.87  
5.83  
5.83

2.94  
2.92  
2.90  
2.77  
2.77  
2.75  
2.74  
2.74  
2.23

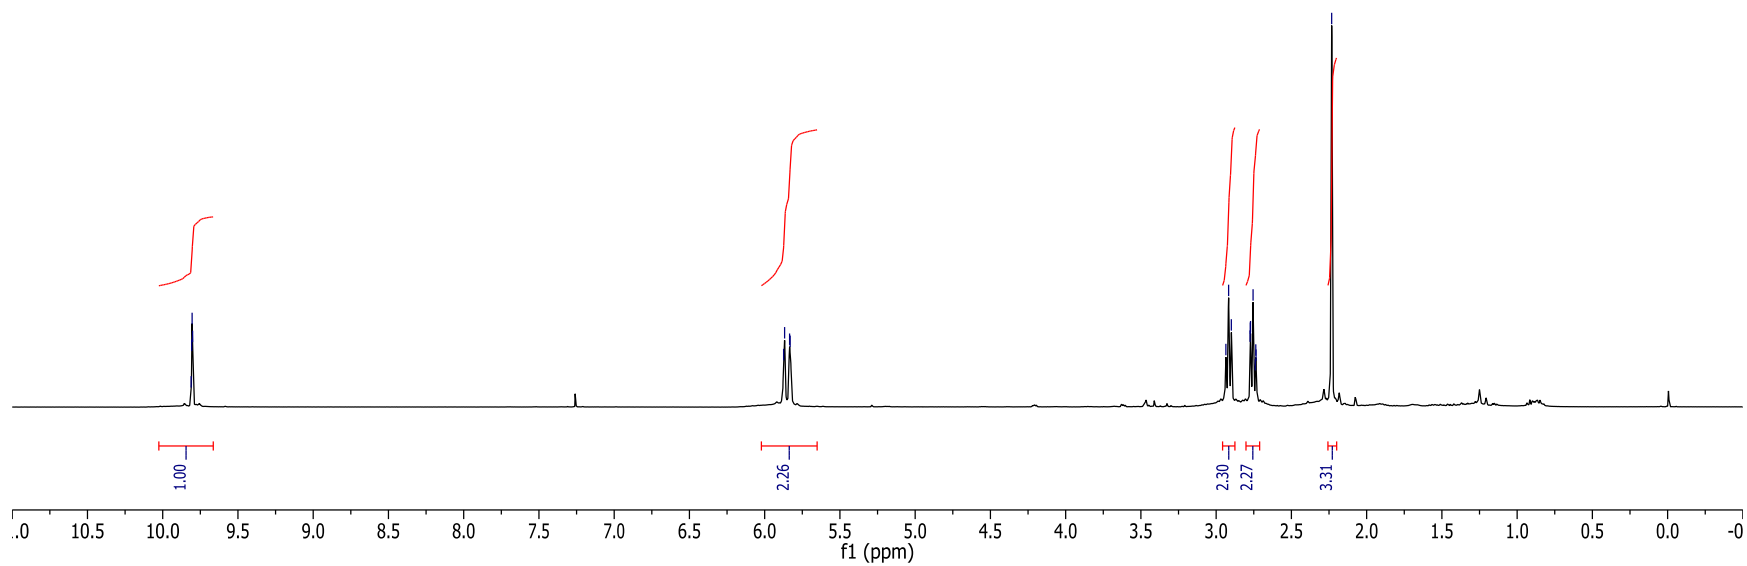

mku-161210-13cnmr  
13C OBSERVE

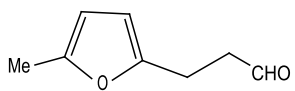

40

201.56

152.16  
151.06

106.33  
106.18

77.58 CDCl<sub>3</sub>  
77.27 CDCl<sub>3</sub>  
76.95 CDCl<sub>3</sub>

42.24

21.05

13.69

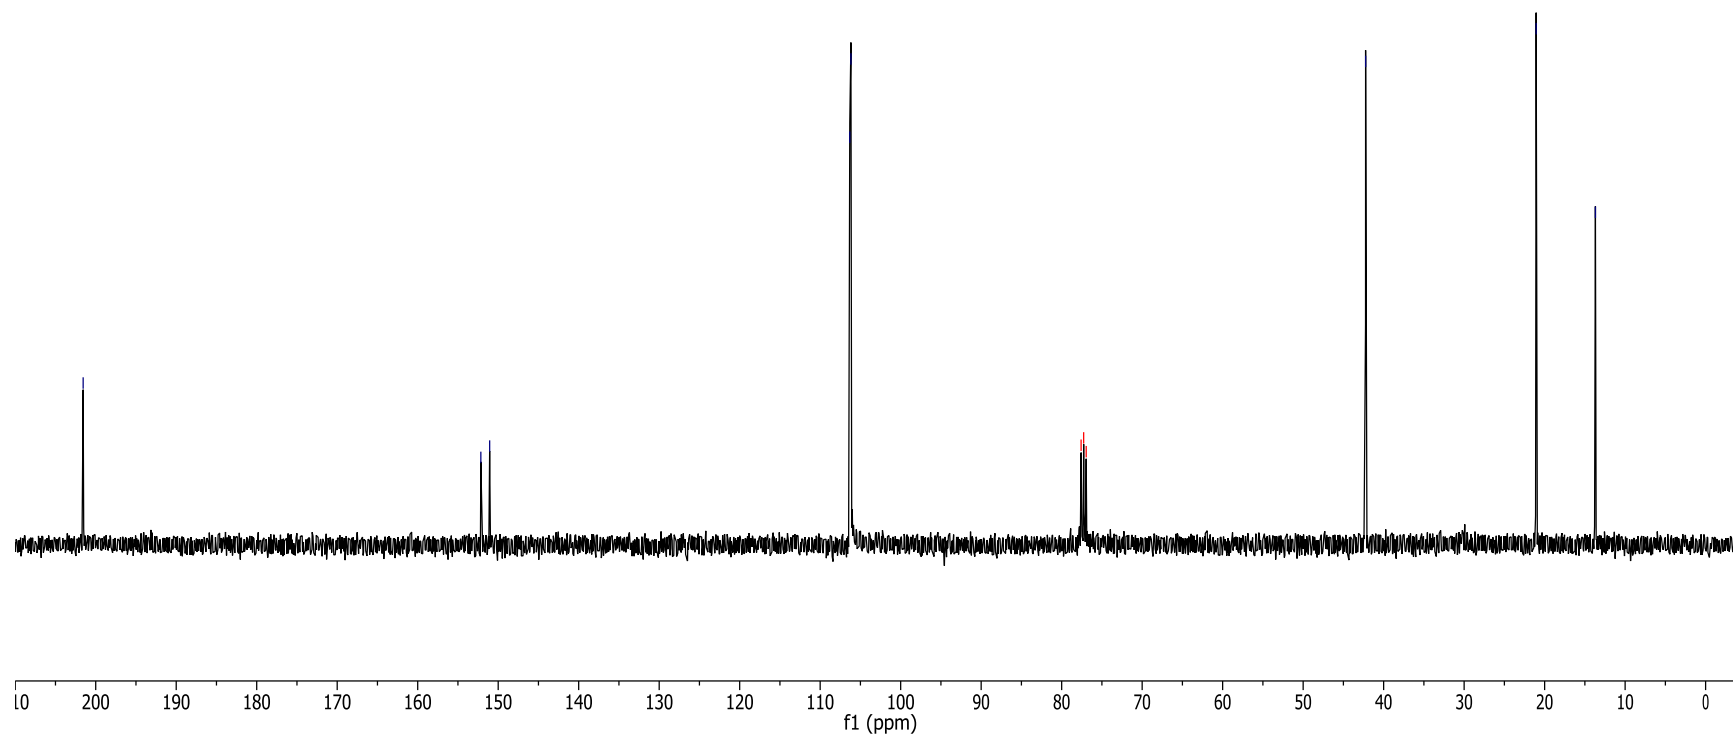

ean-2-171210-1hnmr  
STANDARD 1H OBSERVE

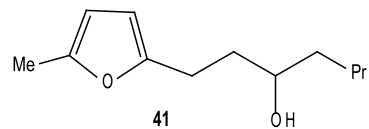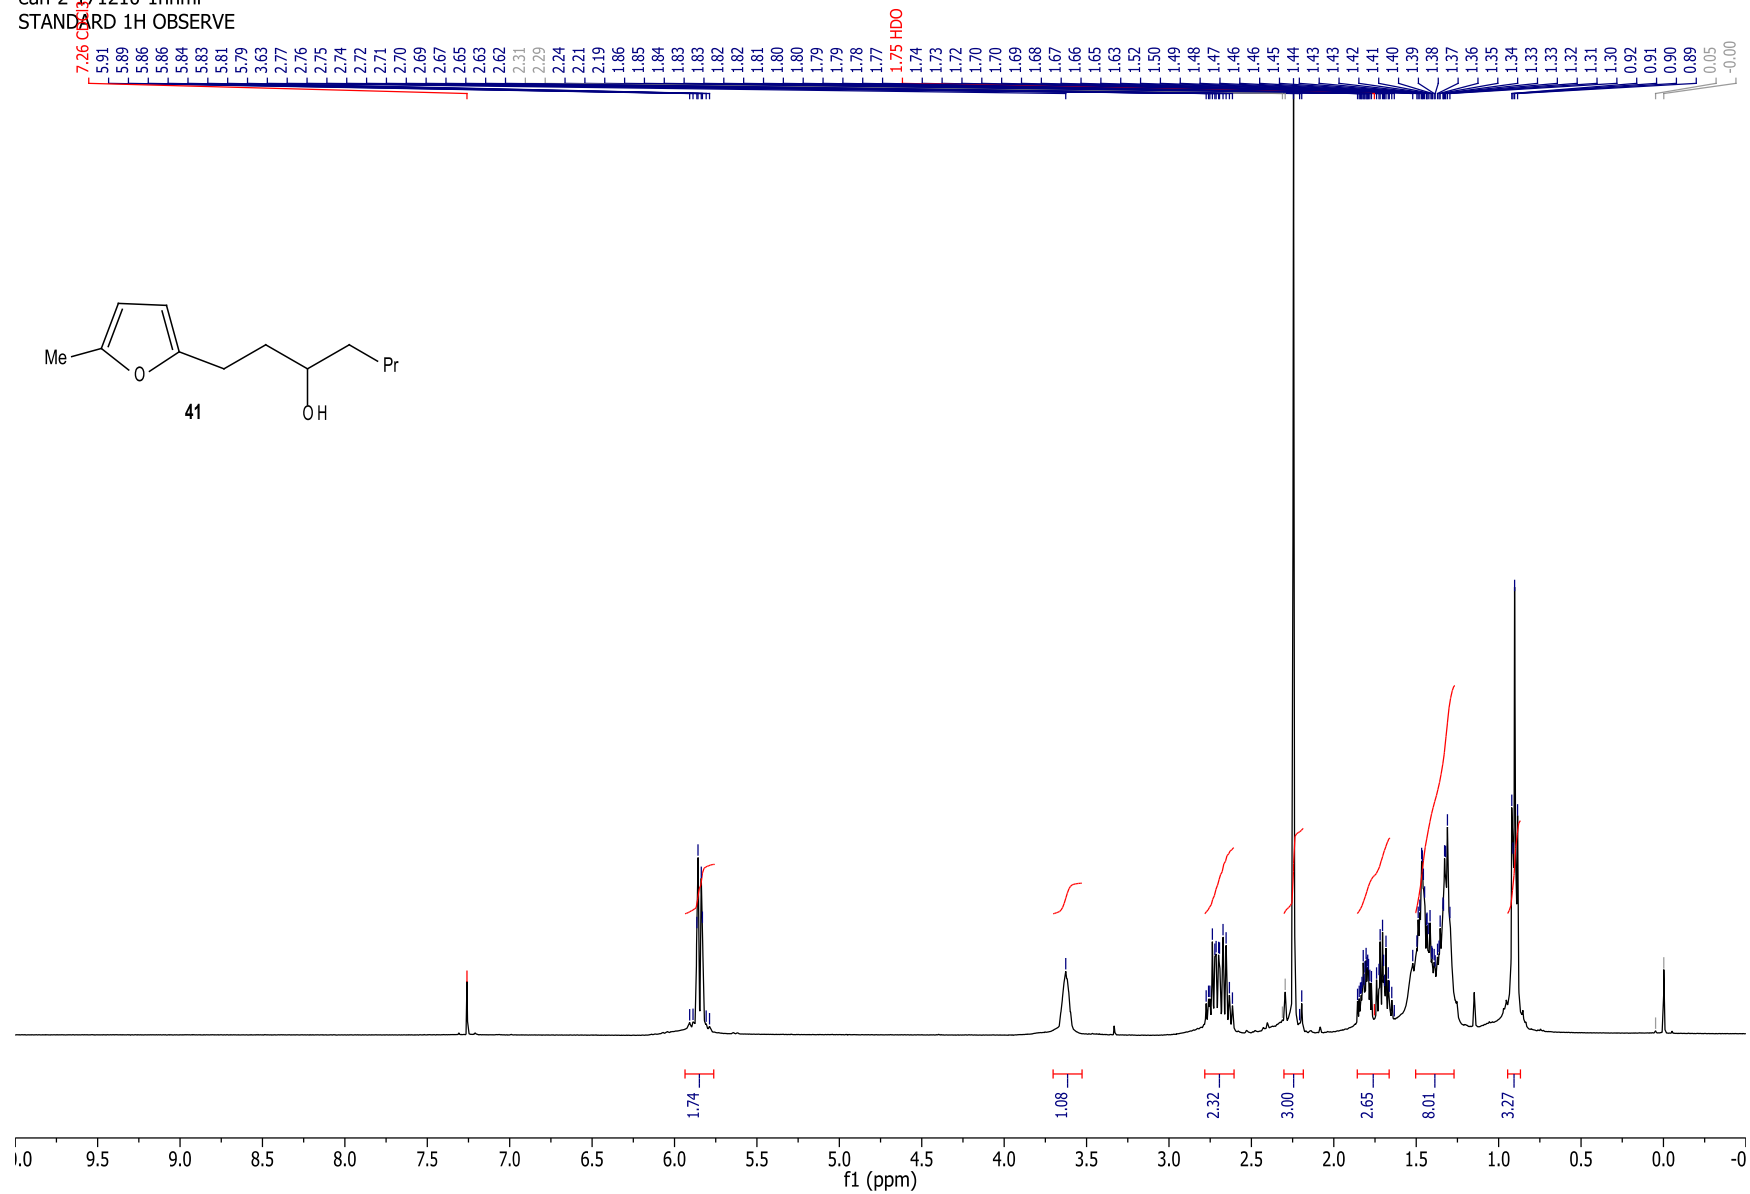



ean-2-171210-13cnmr  
13C OBSERVE

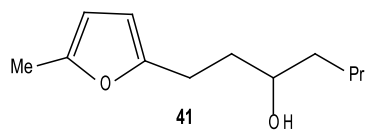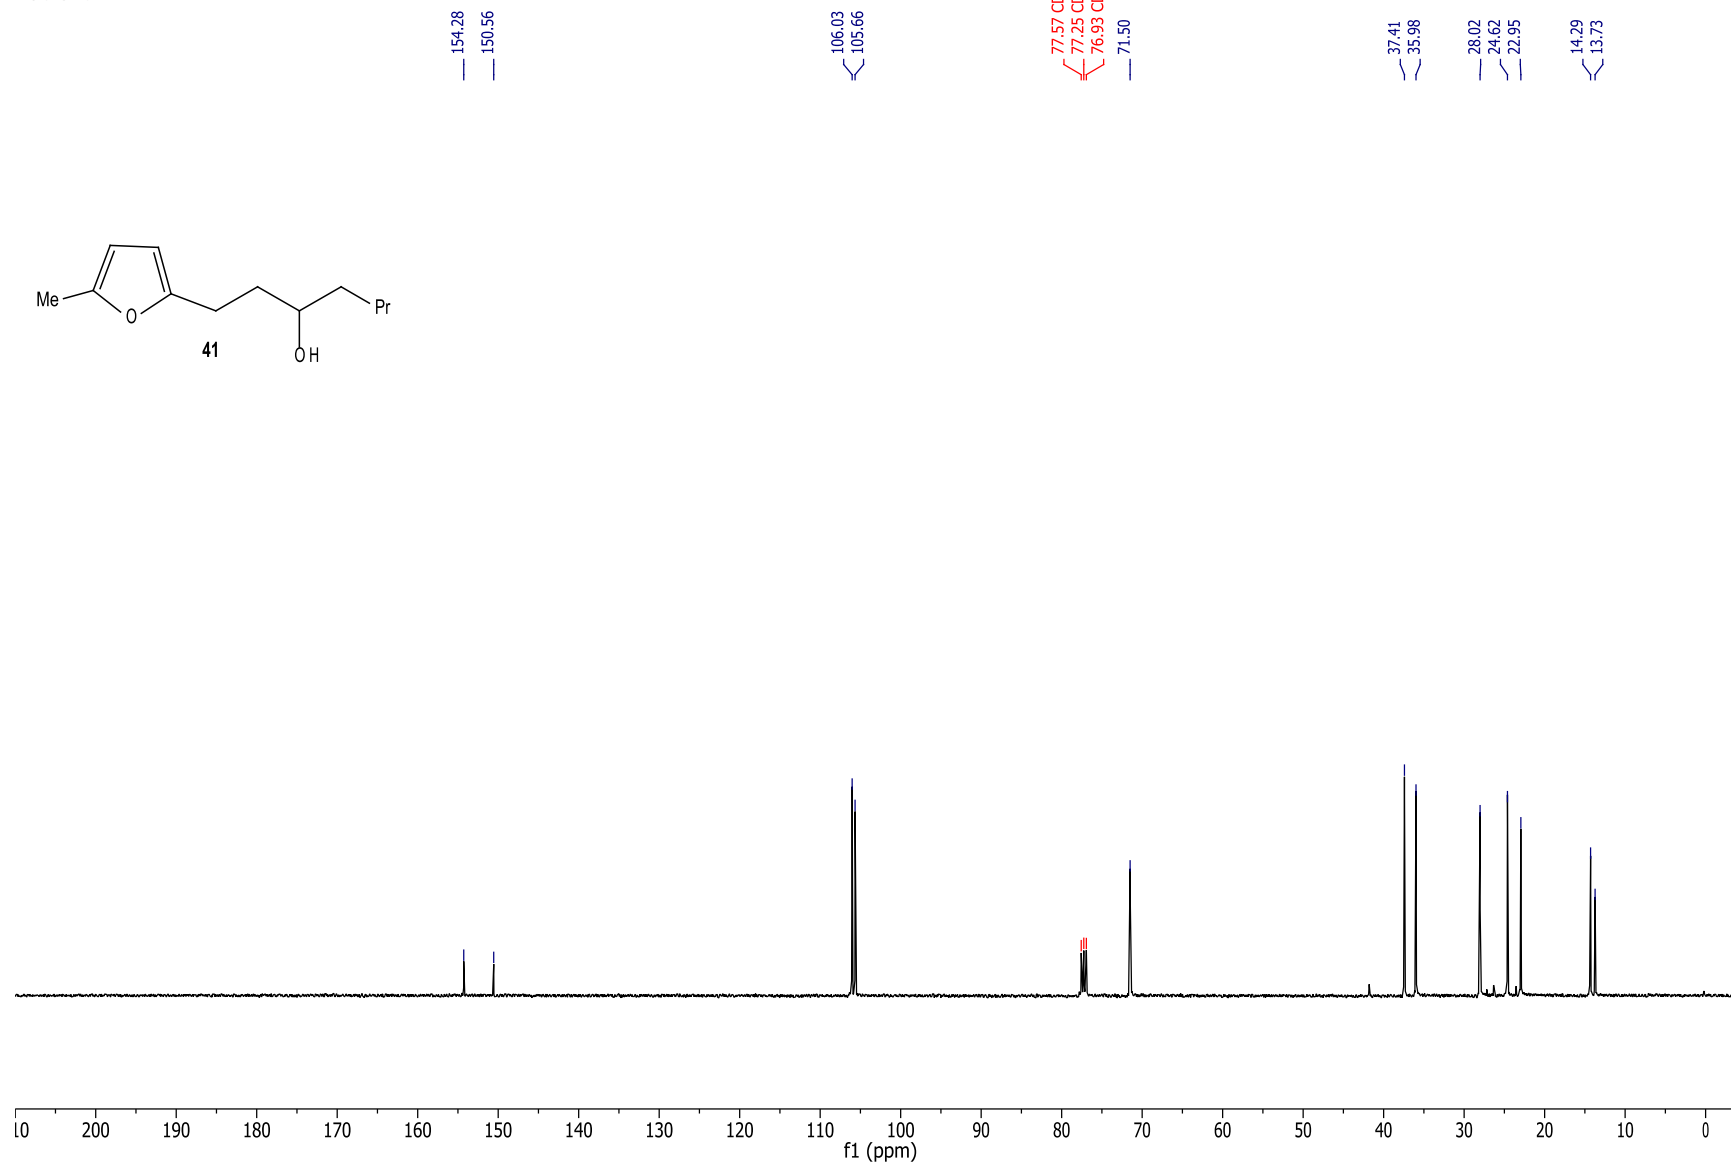

| 7.26 | 7.27 | 7.28 | 7.29 | 7.30 | 7.31 | 7.32 | 7.33 | 7.34 | 7.35 | 7.36 | 7.37 | 7.38 | 7.39 | 7.40 | 7.41 | 7.42 | 7.43 | 7.44 | 7.45 | 7.46 | 7.47 | 7.48 | 7.49 | 7.50 | 7.51 | 7.52 | 7.53 | 7.54 | 7.55 | 7.56 | 7.57 | 7.58 | 7.59 | 7.60 | 7.61 | 7.62 | 7.63 | 7.64 | 7.65 | 7.66 | 7.67 | 7.68 | 7.69 | 7.70 | 7.71 | 7.72 | 7.73 | 7.74 | 7.75 | 7.76 | 7.77 | 7.78 | 7.79 | 7.80 | 7.81 | 7.82 | 7.83 | 7.84 | 7.85 | 7.86 | 7.87 | 7.88 | 7.89 | 7.90 | 7.91 | 7.92 | 7.93 | 7.94 | 7.95 | 7.96 | 7.97 | 7.98 | 7.99 | 8.00 | 8.01 | 8.02 | 8.03 | 8.04 | 8.05 | 8.06 | 8.07 | 8.08 | 8.09 | 8.10 | 8.11 | 8.12 | 8.13 | 8.14 | 8.15 | 8.16 | 8.17 | 8.18 | 8.19 | 8.20 | 8.21 | 8.22 | 8.23 | 8.24 | 8.25 | 8.26 | 8.27 | 8.28 | 8.29 | 8.30 | 8.31 | 8.32 | 8.33 | 8.34 | 8.35 | 8.36 | 8.37 | 8.38 | 8.39 | 8.40 | 8.41 | 8.42 | 8.43 | 8.44 | 8.45 | 8.46 | 8.47 | 8.48 | 8.49 | 8.50 | 8.51 | 8.52 | 8.53 | 8.54 | 8.55 | 8.56 | 8.57 | 8.58 | 8.59 | 8.60 | 8.61 | 8.62 | 8.63 | 8.64 | 8.65 | 8.66 | 8.67 | 8.68 | 8.69 | 8.70 | 8.71 | 8.72 | 8.73 | 8.74 | 8.75 | 8.76 | 8.77 | 8.78 | 8.79 | 8.80 | 8.81 | 8.82 | 8.83 | 8.84 | 8.85 | 8.86 | 8.87 | 8.88 | 8.89 | 8.90 | 8.91 | 8.92 | 8.93 | 8.94 | 8.95 | 8.96 | 8.97 | 8.98 | 8.99 | 9.00 | 9.01 | 9.02 | 9.03 | 9.04 | 9.05 | 9.06 | 9.07 | 9.08 | 9.09 | 9.10 | 9.11 | 9.12 | 9.13 | 9.14 | 9.15 | 9.16 | 9.17 | 9.18 | 9.19 | 9.20 | 9.21 | 9.22 | 9.23 | 9.24 | 9.25 | 9.26 | 9.27 | 9.28 | 9.29 | 9.30 | 9.31 | 9.32 | 9.33 | 9.34 | 9.35 | 9.36 | 9.37 | 9.38 | 9.39 | 9.40 | 9.41 | 9.42 | 9.43 | 9.44 | 9.45 | 9.46 | 9.47 | 9.48 | 9.49 | 9.50 | 9.51 | 9.52 | 9.53 | 9.54 | 9.55 | 9.56 | 9.57 | 9.58 | 9.59 | 9.60 | 9.61 | 9.62 | 9.63 | 9.64 | 9.65 | 9.66 | 9.67 | 9.68 | 9.69 | 9.70 | 9.71 | 9.72 | 9.73 | 9.74 | 9.75 | 9.76 | 9.77 | 9.78 | 9.79 | 9.80 | 9.81 | 9.82 | 9.83 | 9.84 | 9.85 | 9.86 | 9.87 | 9.88 | 9.89 | 9.90 | 9.91 | 9.92 | 9.93 | 9.94 | 9.95 | 9.96 | 9.97 | 9.98 | 9.99 | 10.00 |
|------|------|------|------|------|------|------|------|------|------|------|------|------|------|------|------|------|------|------|------|------|------|------|------|------|------|------|------|------|------|------|------|------|------|------|------|------|------|------|------|------|------|------|------|------|------|------|------|------|------|------|------|------|------|------|------|------|------|------|------|------|------|------|------|------|------|------|------|------|------|------|------|------|------|------|------|------|------|------|------|------|------|------|------|------|------|------|------|------|------|------|------|------|------|------|------|------|------|------|------|------|------|------|------|------|------|------|------|------|------|------|------|------|------|------|------|------|------|------|------|------|------|------|------|------|------|------|------|------|------|------|------|------|------|------|------|------|------|------|------|------|------|------|------|------|------|------|------|------|------|------|------|------|------|------|------|------|------|------|------|------|------|------|------|------|------|------|------|------|------|------|------|------|------|------|------|------|------|------|------|------|------|------|------|------|------|------|------|------|------|------|------|------|------|------|------|------|------|------|------|------|------|------|------|------|------|------|------|------|------|------|------|------|------|------|------|------|------|------|------|------|------|------|------|------|------|------|------|------|------|------|------|------|------|------|------|------|------|------|------|------|------|------|------|------|------|------|------|------|------|------|------|------|------|------|------|------|------|------|------|------|------|------|------|------|------|------|------|------|------|------|------|------|------|-------|
| 7.26 | 7.27 | 7.28 | 7.29 | 7.30 | 7.31 | 7.32 | 7.33 | 7.34 | 7.35 | 7.36 | 7.37 | 7.38 | 7.39 | 7.40 | 7.41 | 7.42 | 7.43 | 7.44 | 7.45 | 7.46 | 7.47 | 7.48 | 7.49 | 7.50 | 7.51 | 7.52 | 7.53 | 7.54 | 7.55 | 7.56 | 7.57 | 7.58 | 7.59 | 7.60 | 7.61 | 7.62 | 7.63 | 7.64 | 7.65 | 7.66 | 7.67 | 7.68 | 7.69 | 7.70 | 7.71 | 7.72 | 7.73 | 7.74 | 7.75 | 7.76 | 7.77 | 7.78 | 7.79 | 7.80 | 7.81 | 7.82 | 7.83 | 7.84 | 7.85 | 7.86 | 7.87 | 7.88 | 7.89 | 7.90 | 7.91 | 7.92 | 7.93 | 7.94 | 7.95 | 7.96 | 7.97 | 7.98 | 7.99 | 8.00 | 8.01 | 8.02 | 8.03 | 8.04 | 8.05 | 8.06 | 8.07 | 8.08 | 8.09 | 8.10 | 8.11 | 8.12 | 8.13 | 8.14 | 8.15 | 8.16 | 8.17 | 8.18 | 8.19 | 8.20 | 8.21 | 8.22 | 8.23 | 8.24 | 8.25 | 8.26 | 8.27 | 8.28 | 8.29 | 8.30 | 8.31 | 8.32 | 8.33 | 8.34 | 8.35 | 8.36 | 8.37 | 8.38 | 8.39 | 8.40 | 8.41 | 8.42 | 8.43 | 8.44 | 8.45 | 8.46 | 8.47 | 8.48 | 8.49 | 8.50 | 8.51 | 8.52 | 8.53 | 8.54 | 8.55 | 8.56 | 8.57 |      |      |      |      |      |      |      |      |      |      |      |      |      |      |      |      |      |      |      |      |      |      |      |      |      |      |      |      |      |      |      |      |      |      |      |      |      |      |      |      |      |      |      |      |      |      |      |      |      |      |      |      |      |      |      |      |      |      |      |      |      |      |      |      |      |      |      |      |      |      |      |      |      |      |      |      |      |      |      |      |      |      |      |      |      |      |      |      |      |      |      |      |      |      |      |      |      |      |      |      |      |      |      |      |      |      |      |      |      |      |      |      |      |      |      |      |      |      |      |      |      |      |      |      |      |      |      |      |      |      |      |      |      |      |      |      |      |      |      |      |      |      |       |

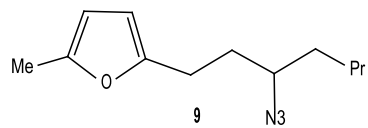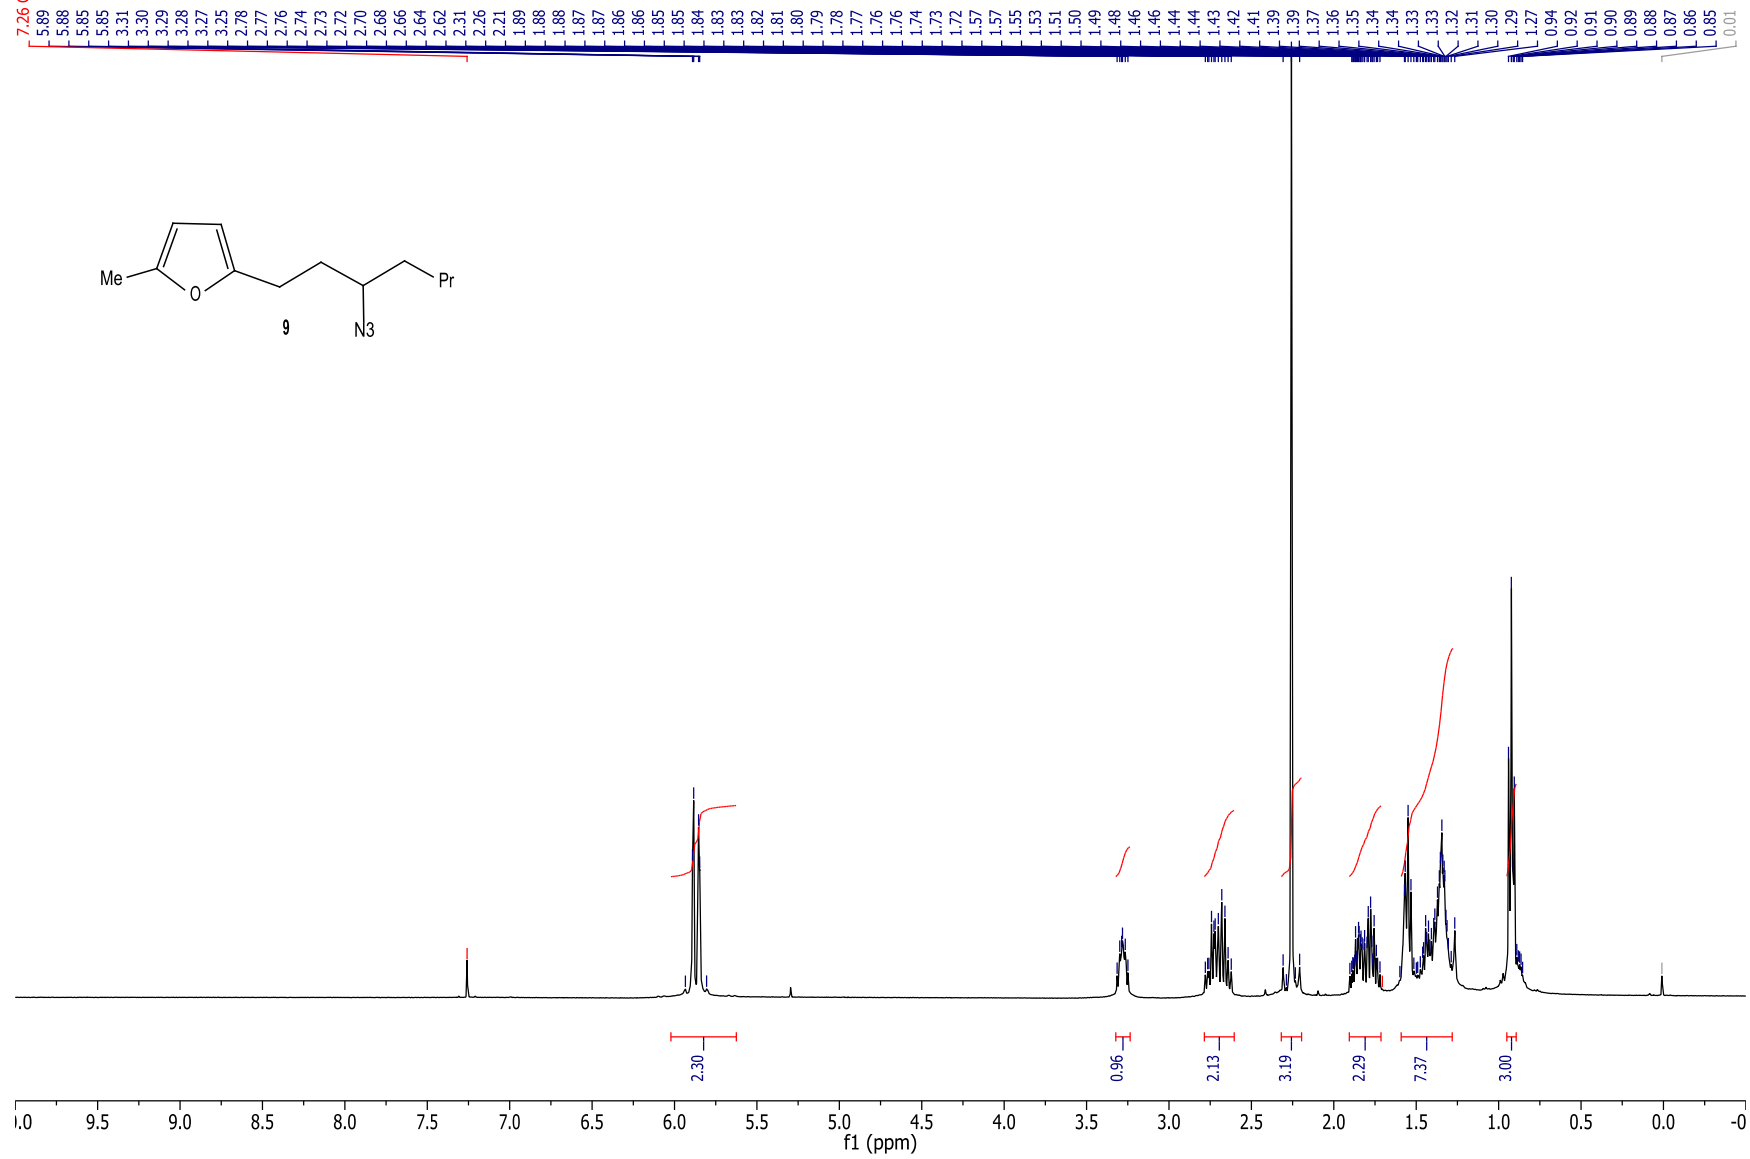

mku-221210-13cnmr  
13C OBSERVE

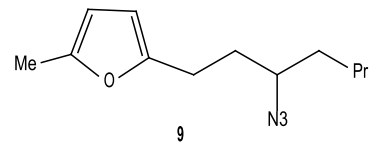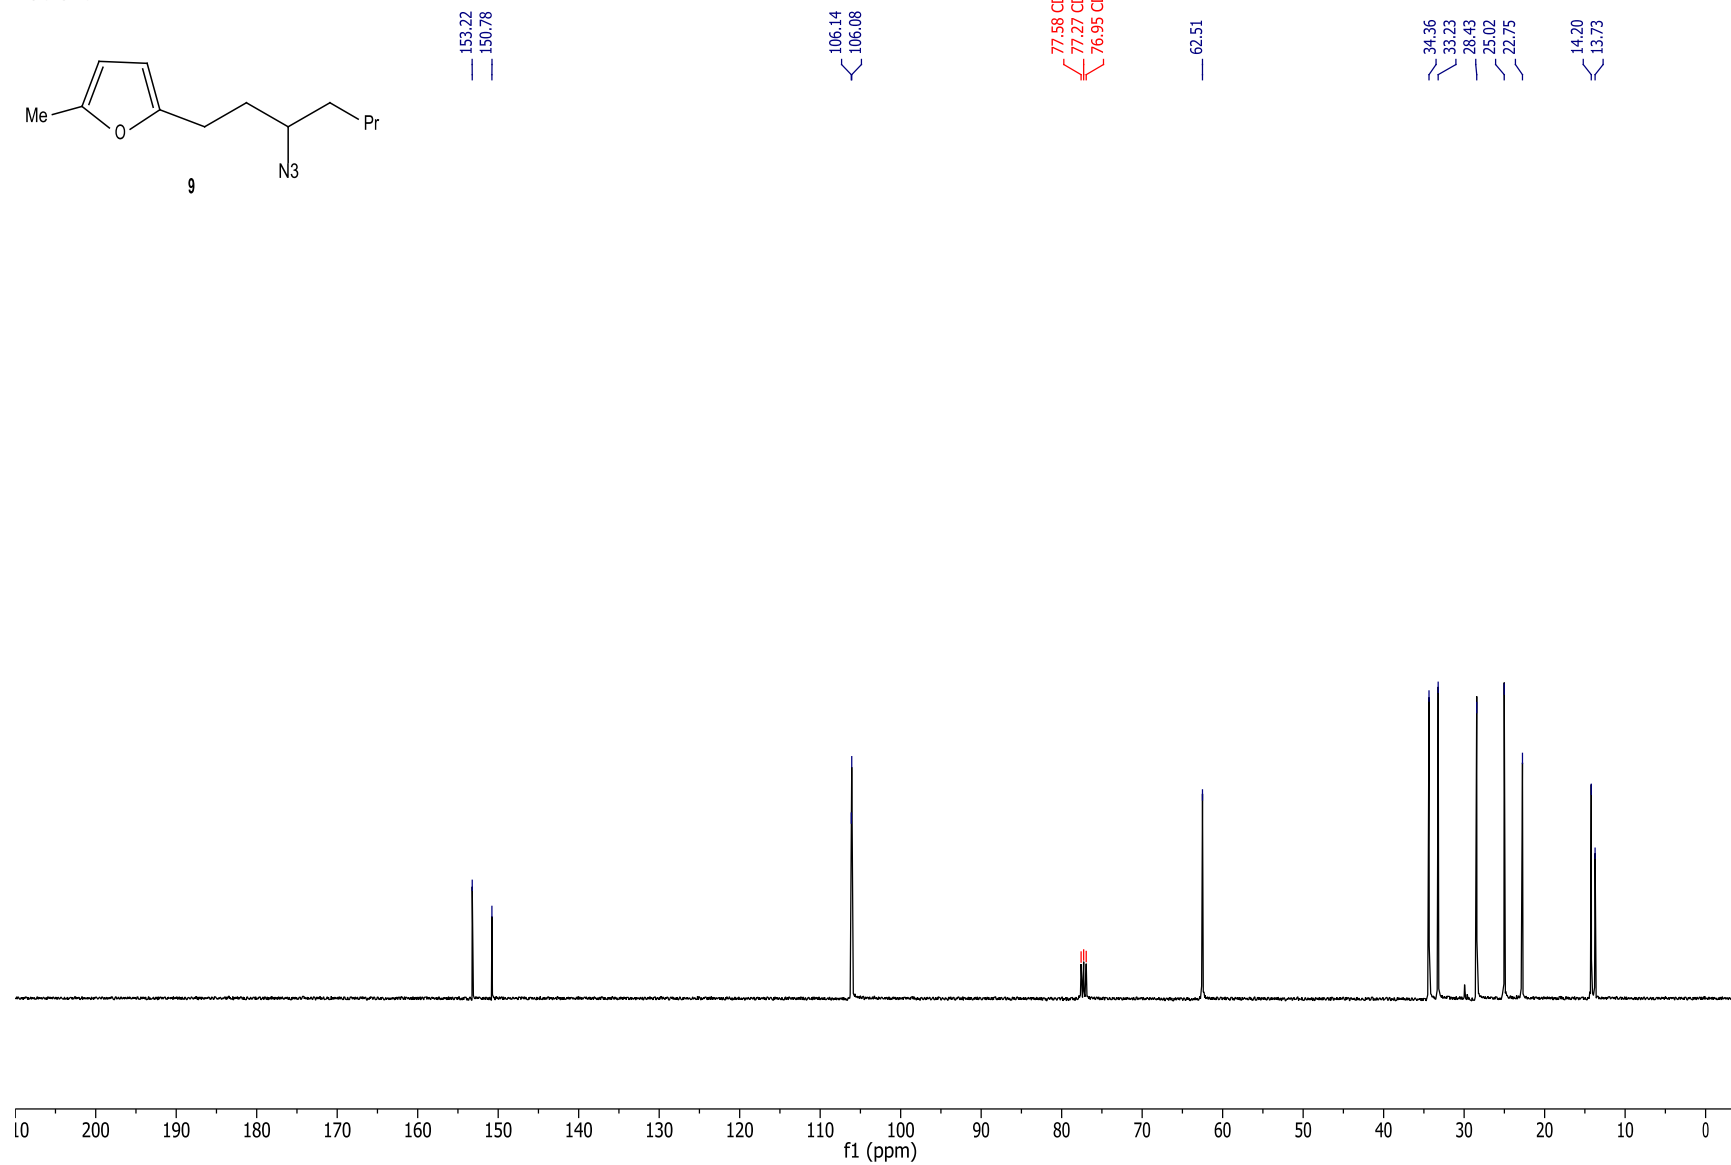



**10**

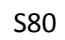

ean-2-290111-13cnmr  
13C OBSERVE

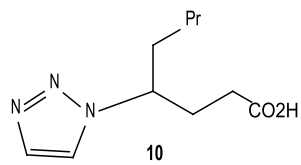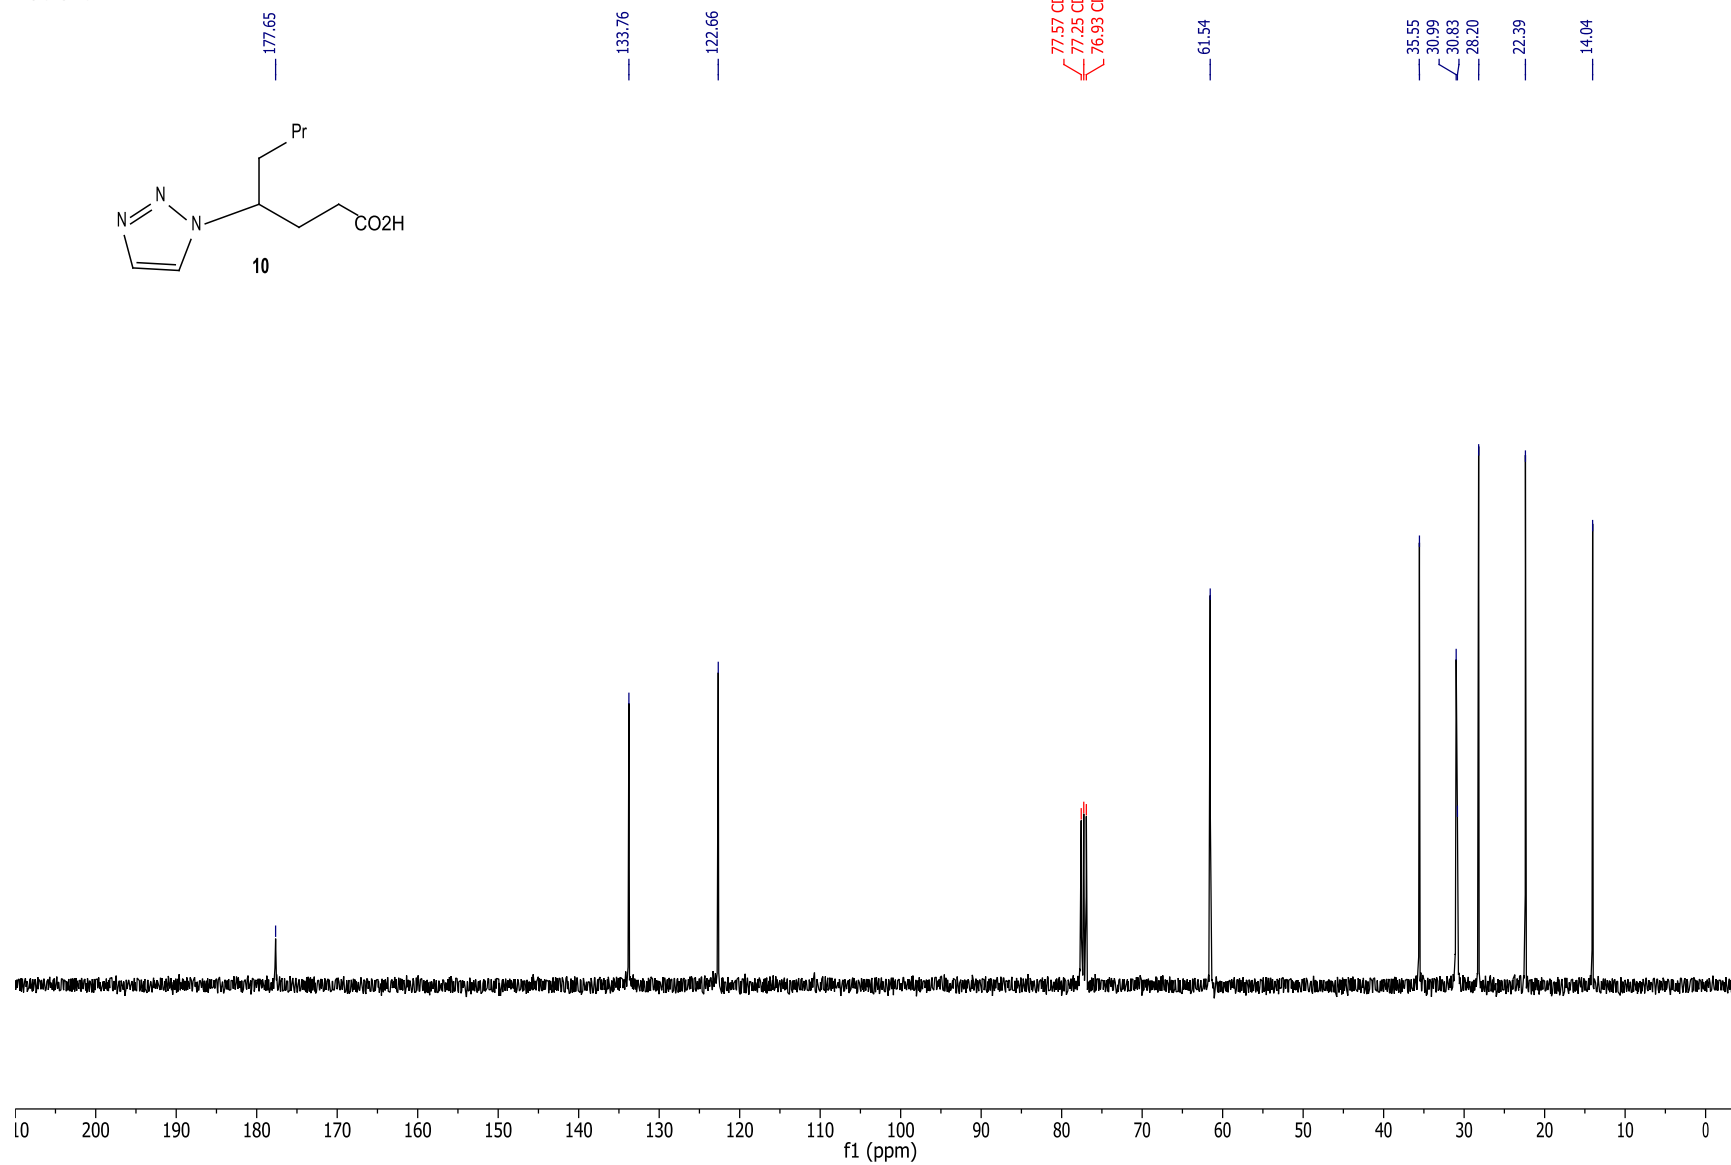

mku02052011proton  
STANDARD 1H OBSERVE

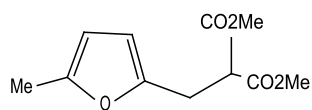

46

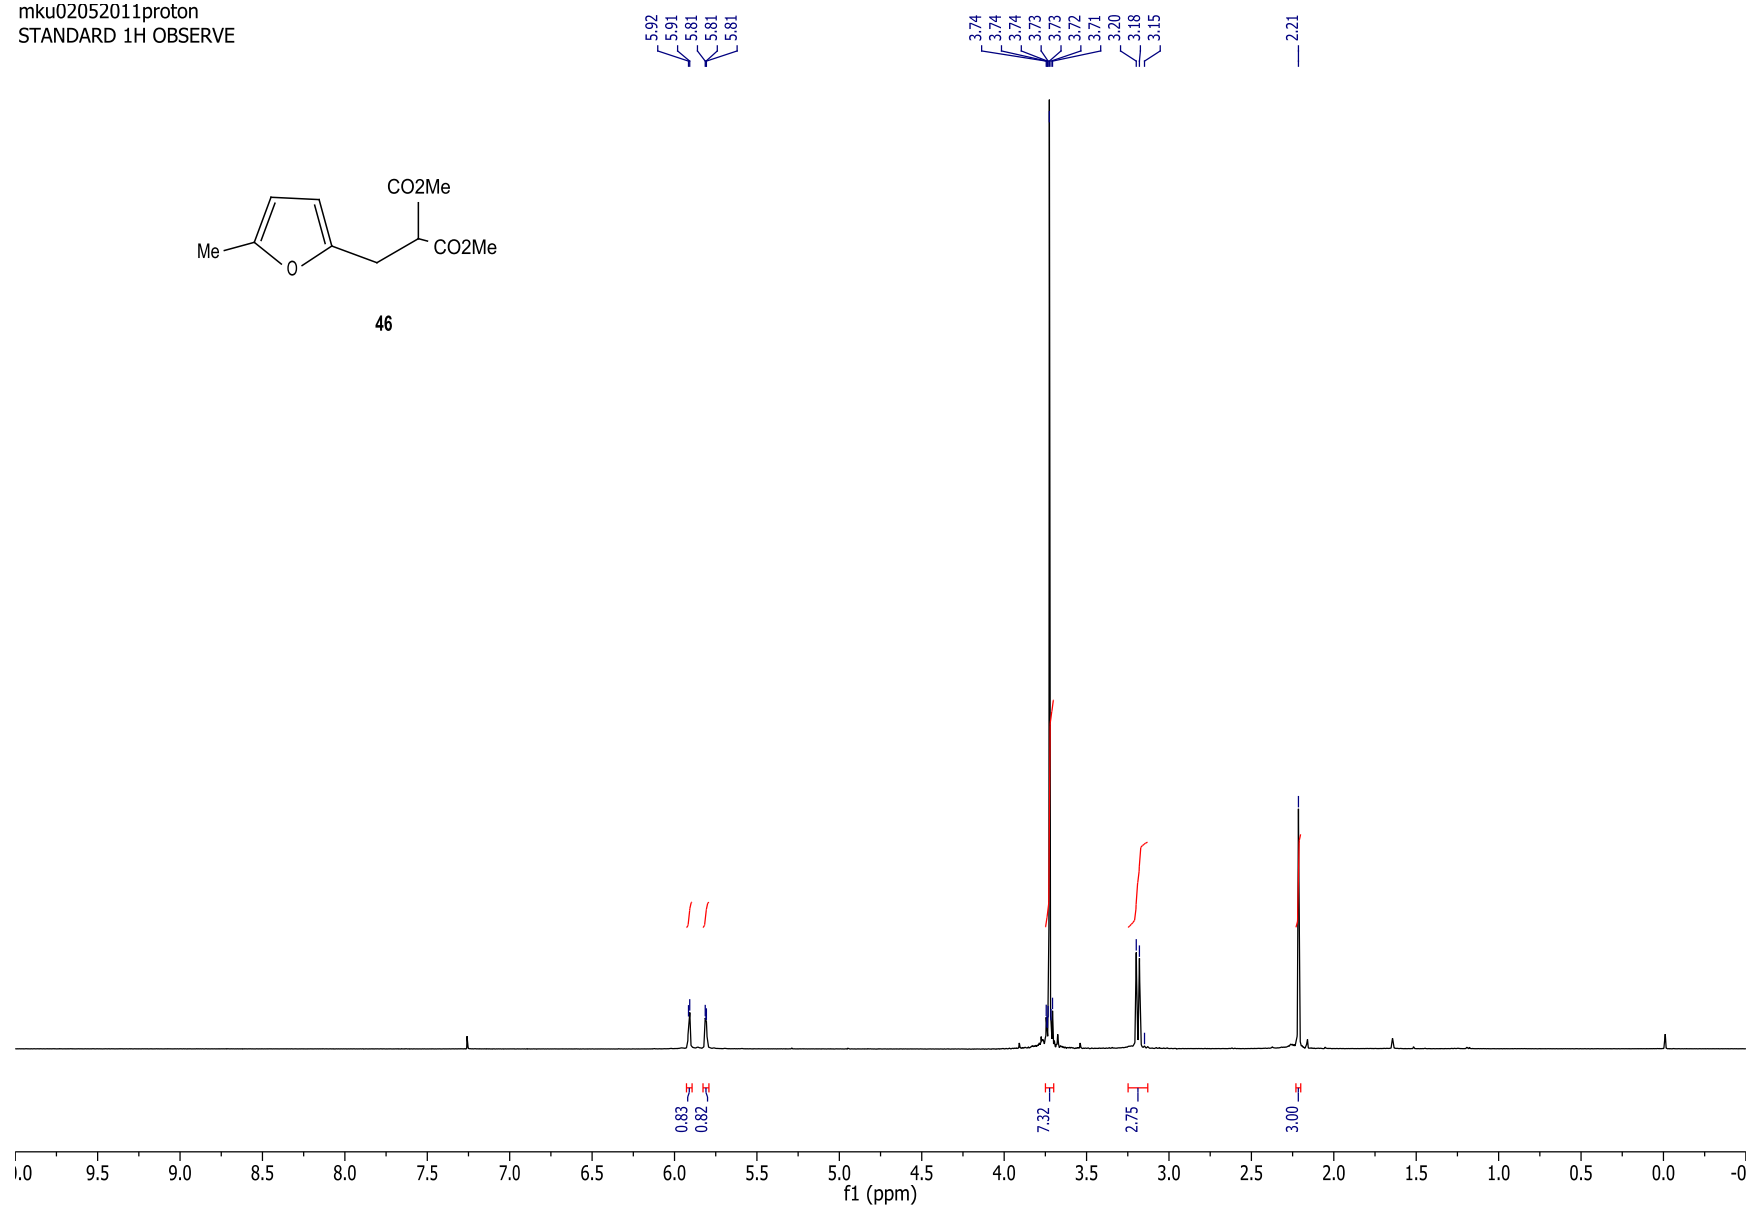

S82

mku02052011karbon  
13C OBSERVE

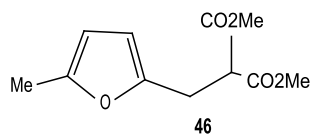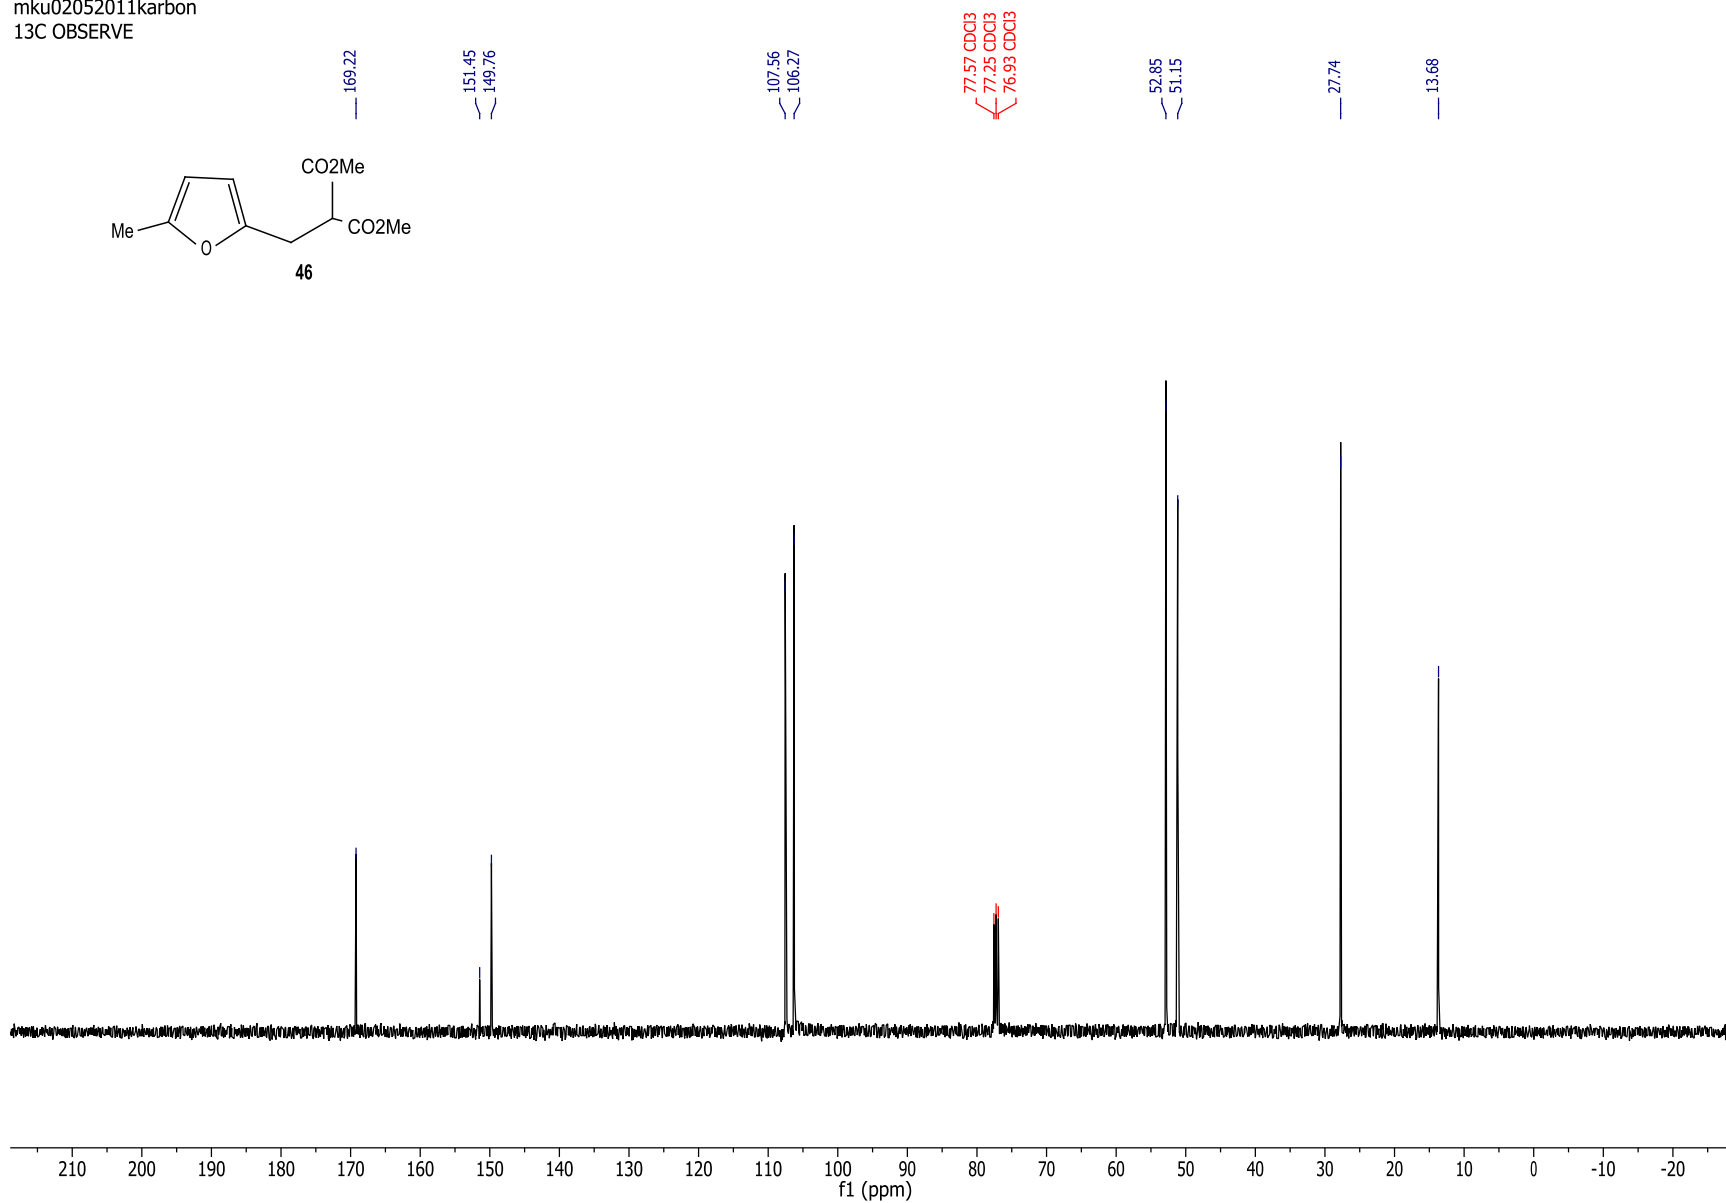

ake-250111-1hnmr  
STANDARD 1H OBSERVE

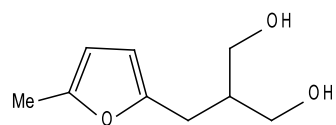

47

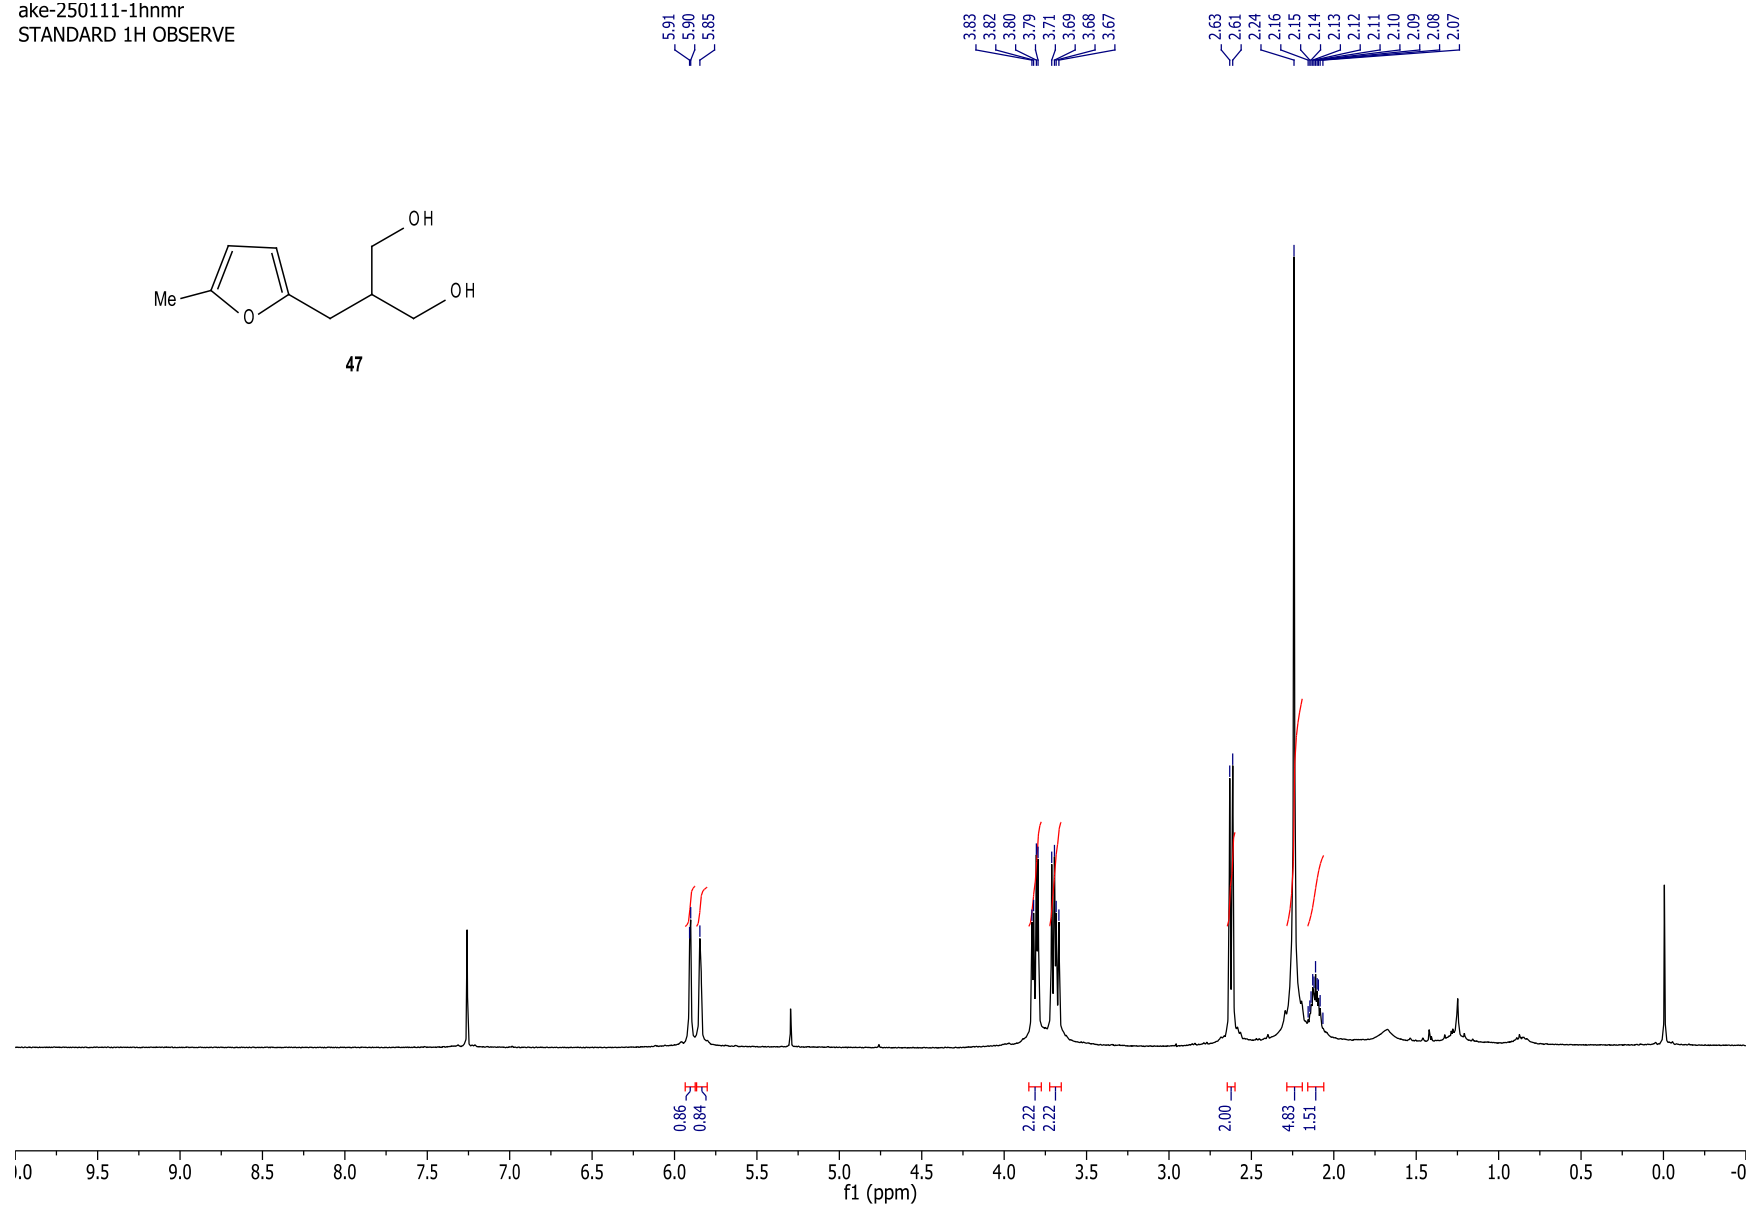



ake-250111-13cnmr  
13C OBSERVE

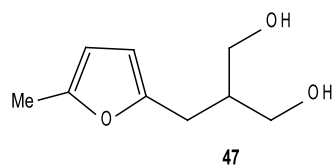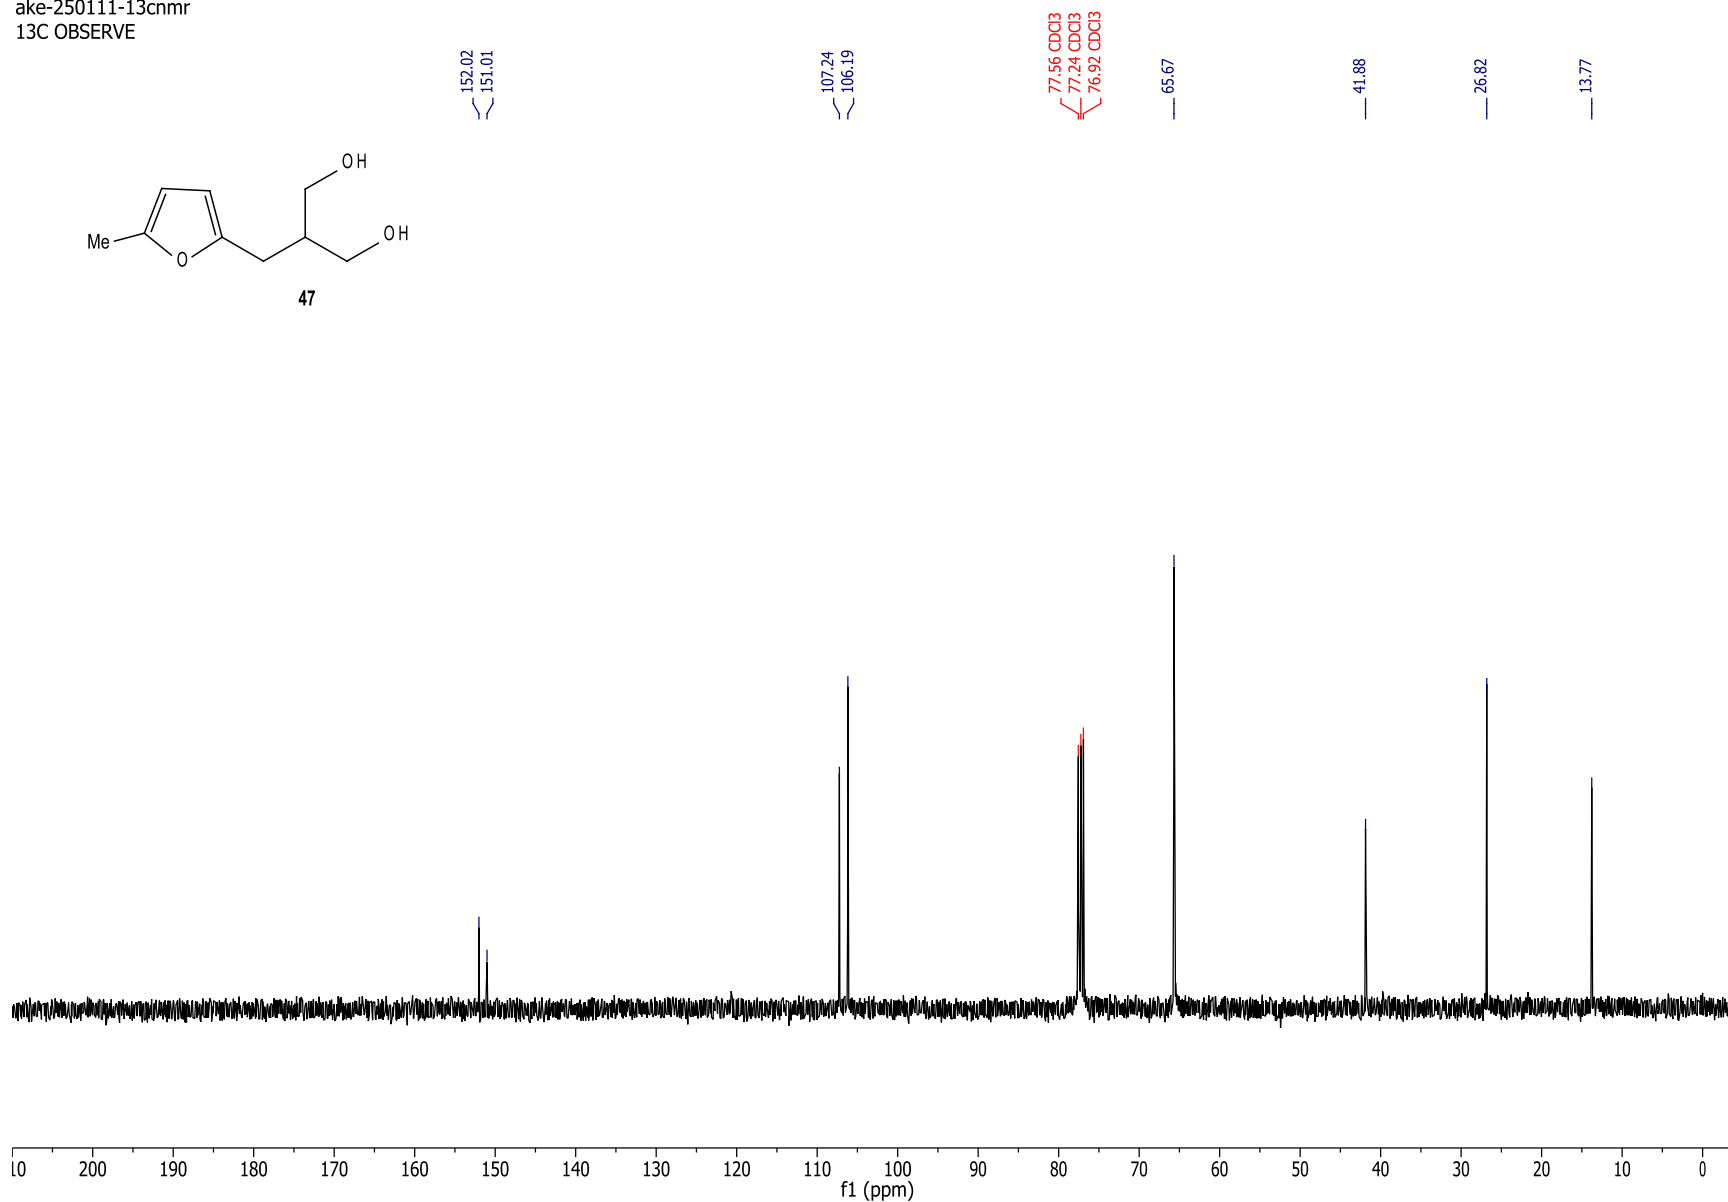

mku-040211-1hnmr  
STANDARD 1H OBSERVE

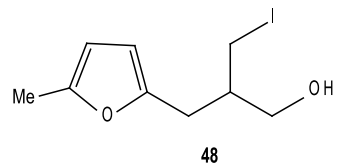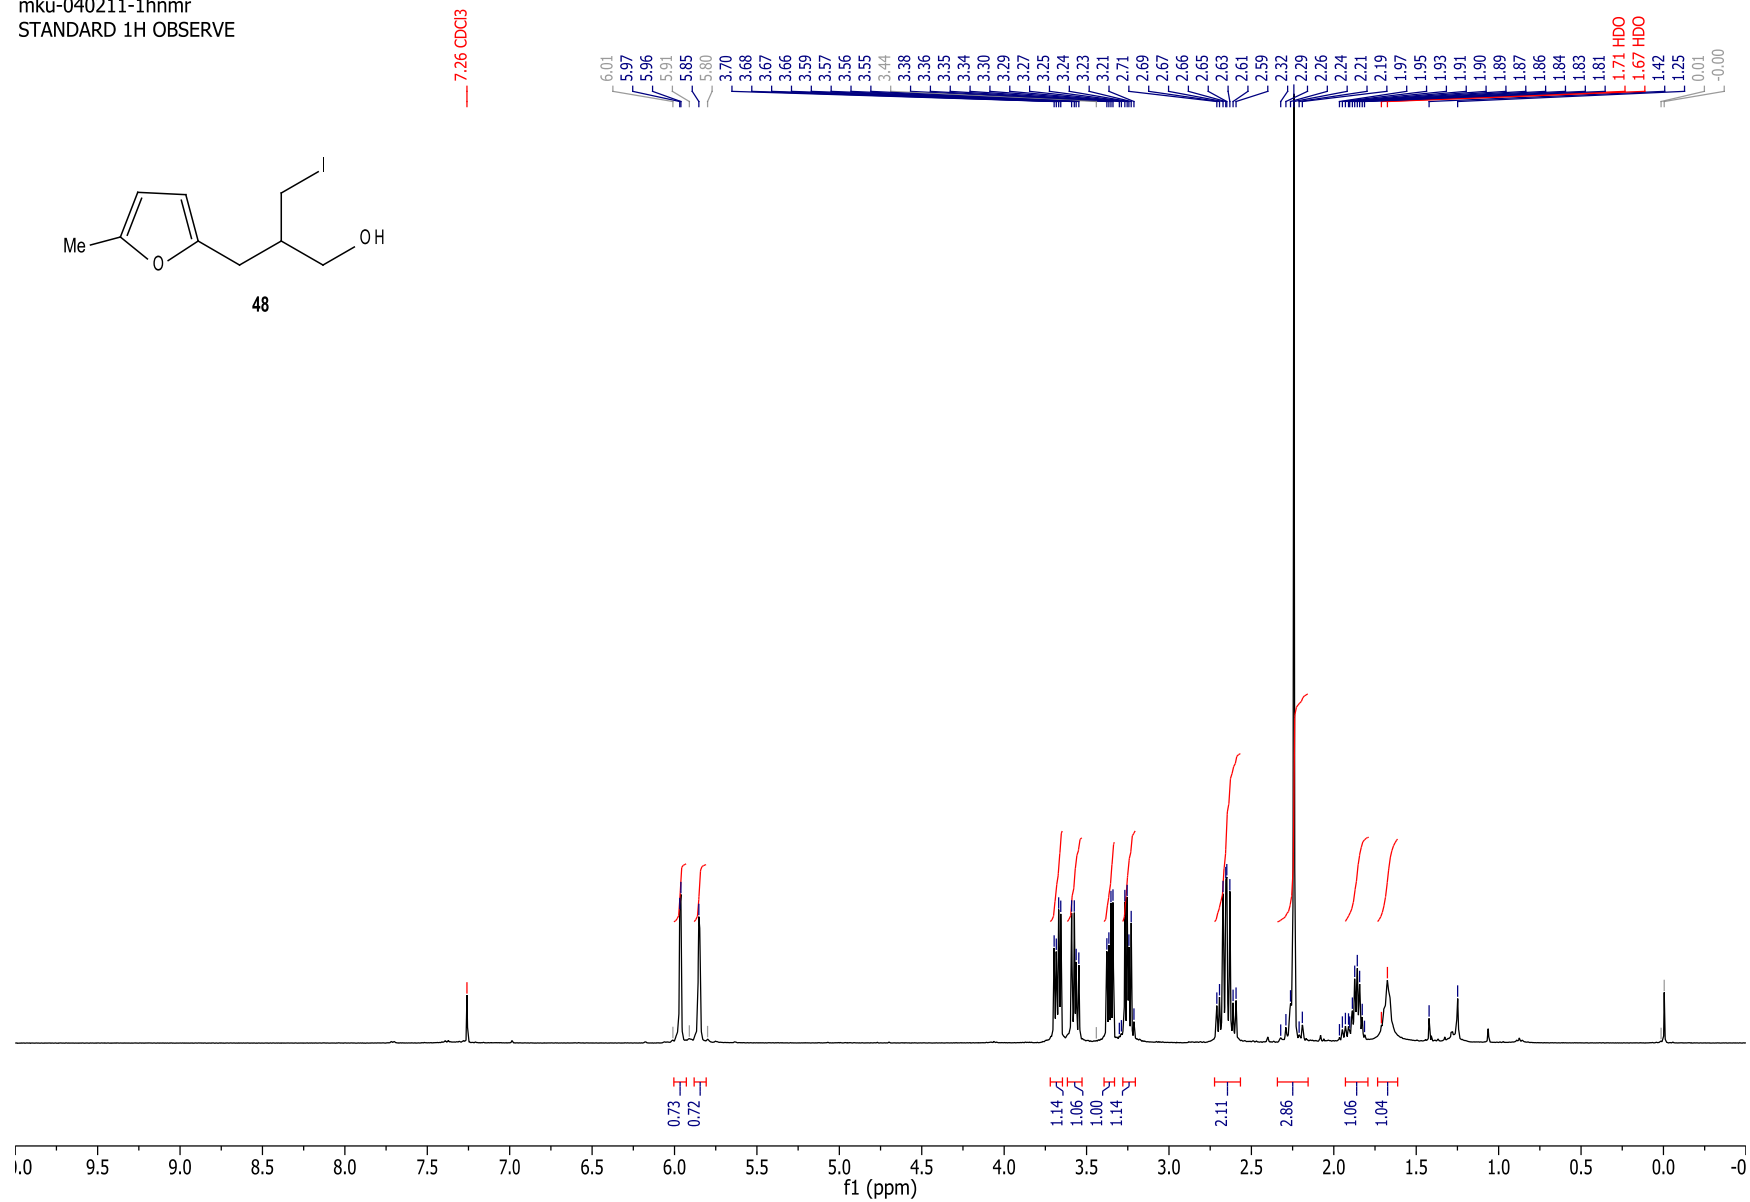

mku-040211-13cnmr  
13C OBSERVE

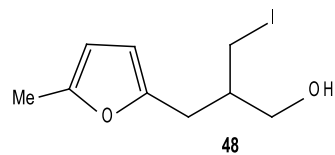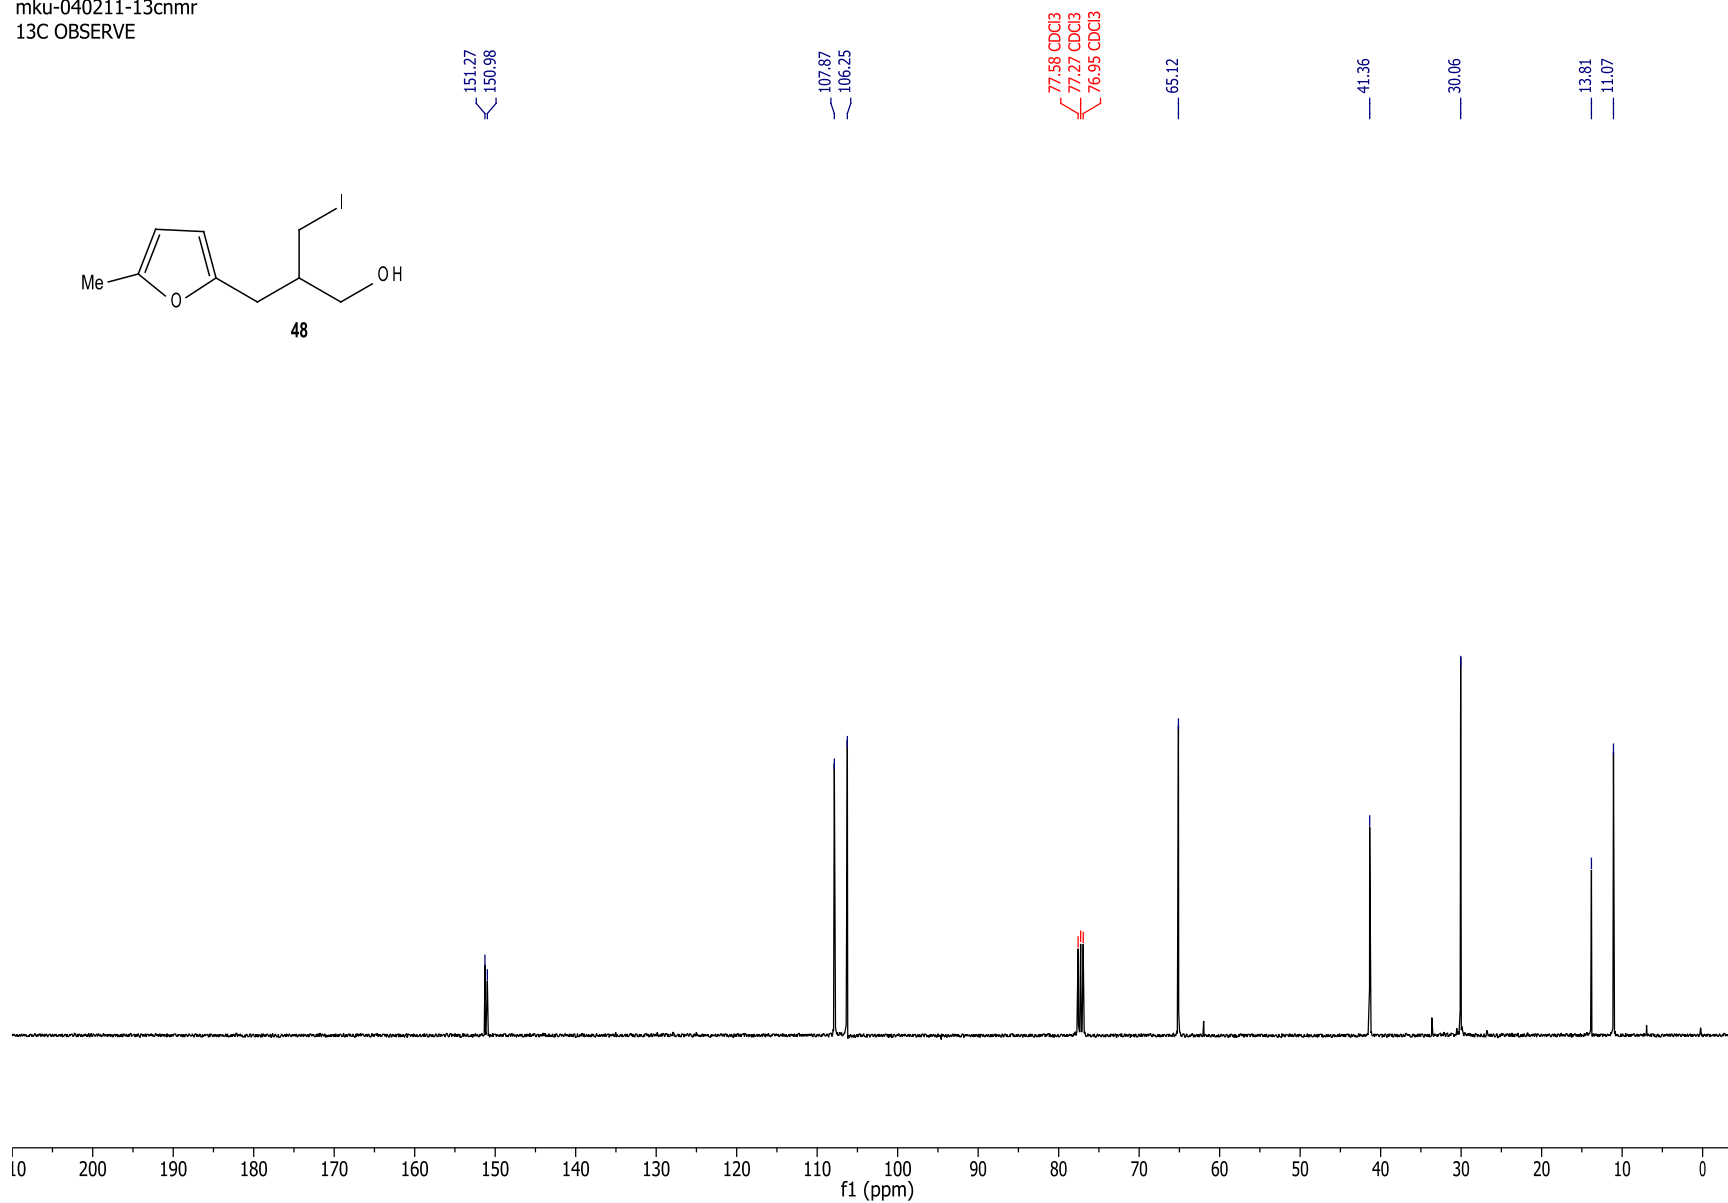

ake-290111-1hnmr  
STANDARD 1H OBSERVE

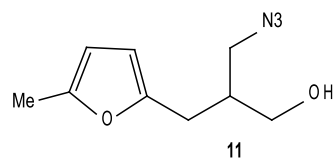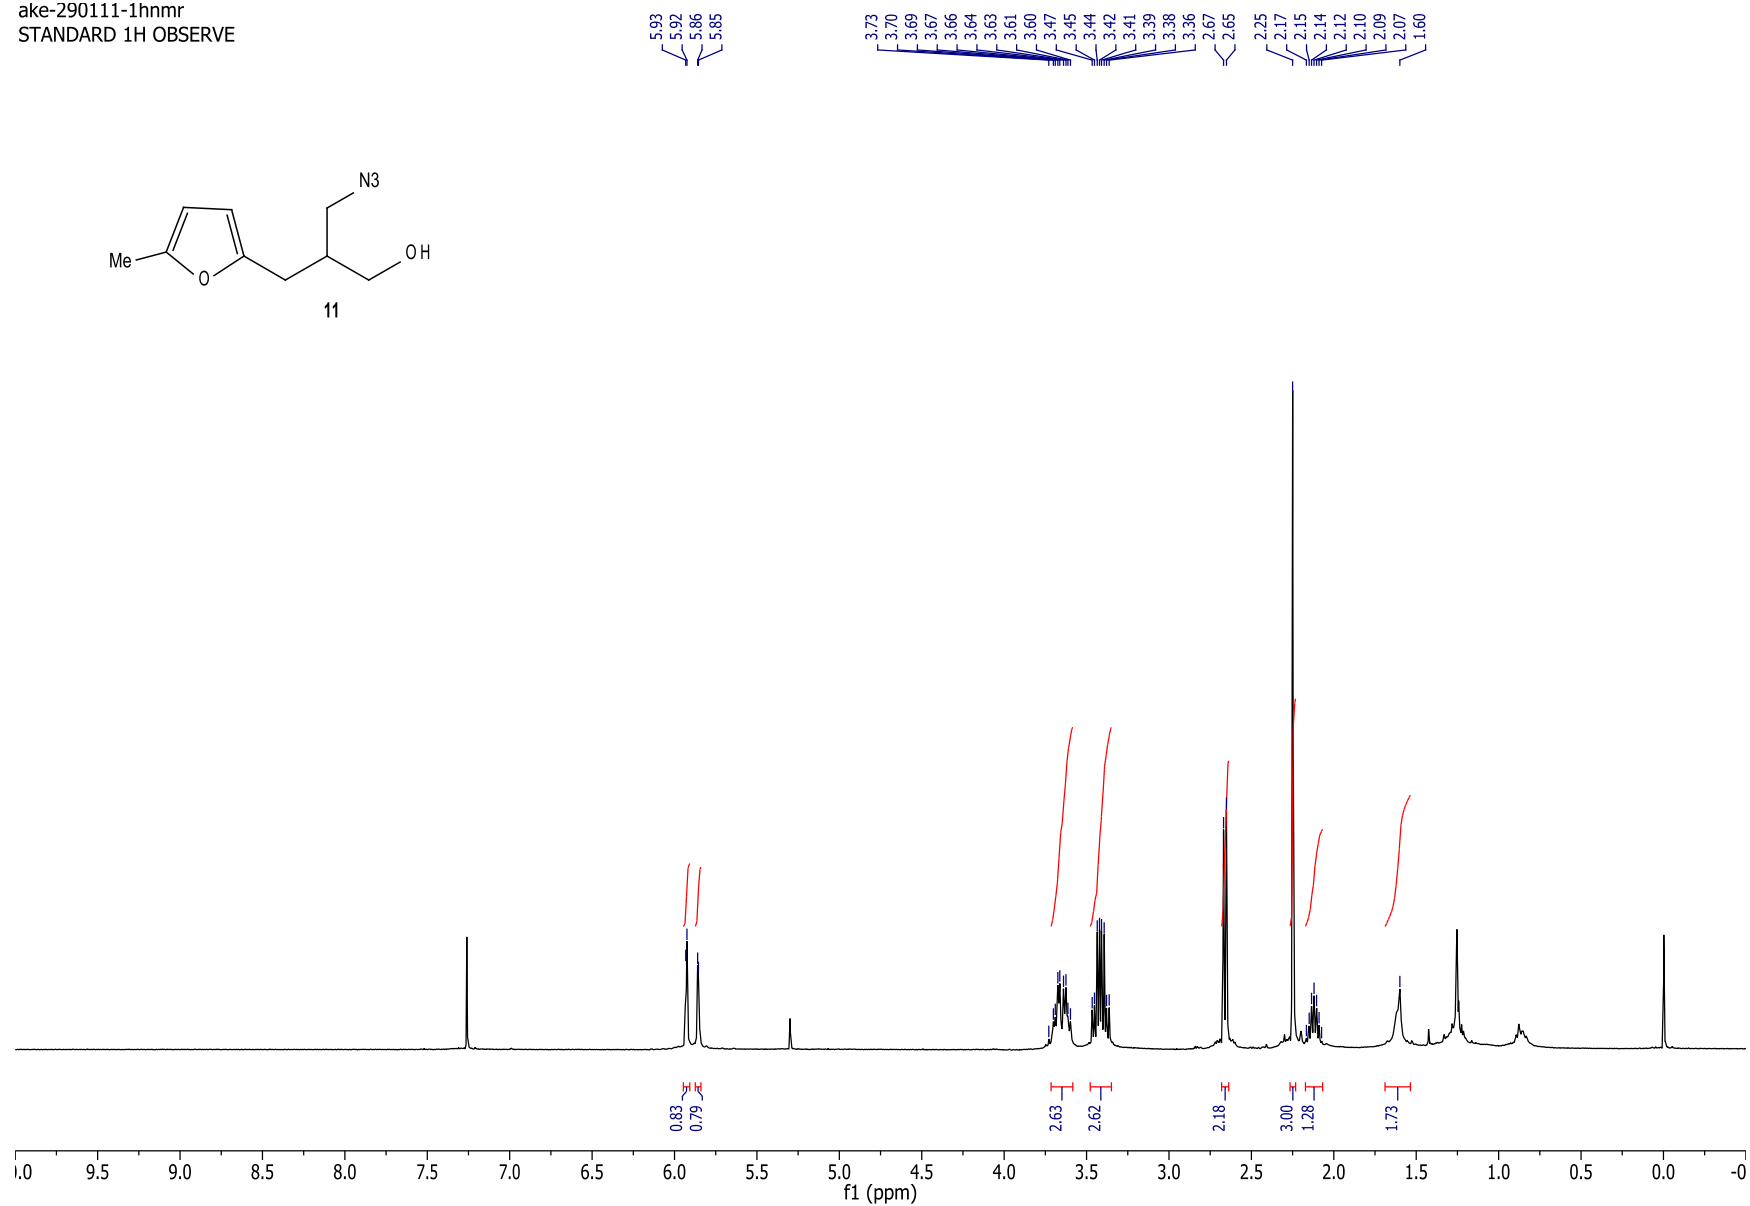

ake-290111-13cnmr  
13C OBSERVE

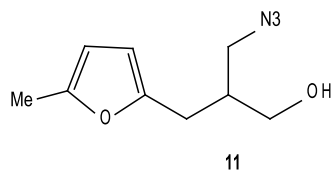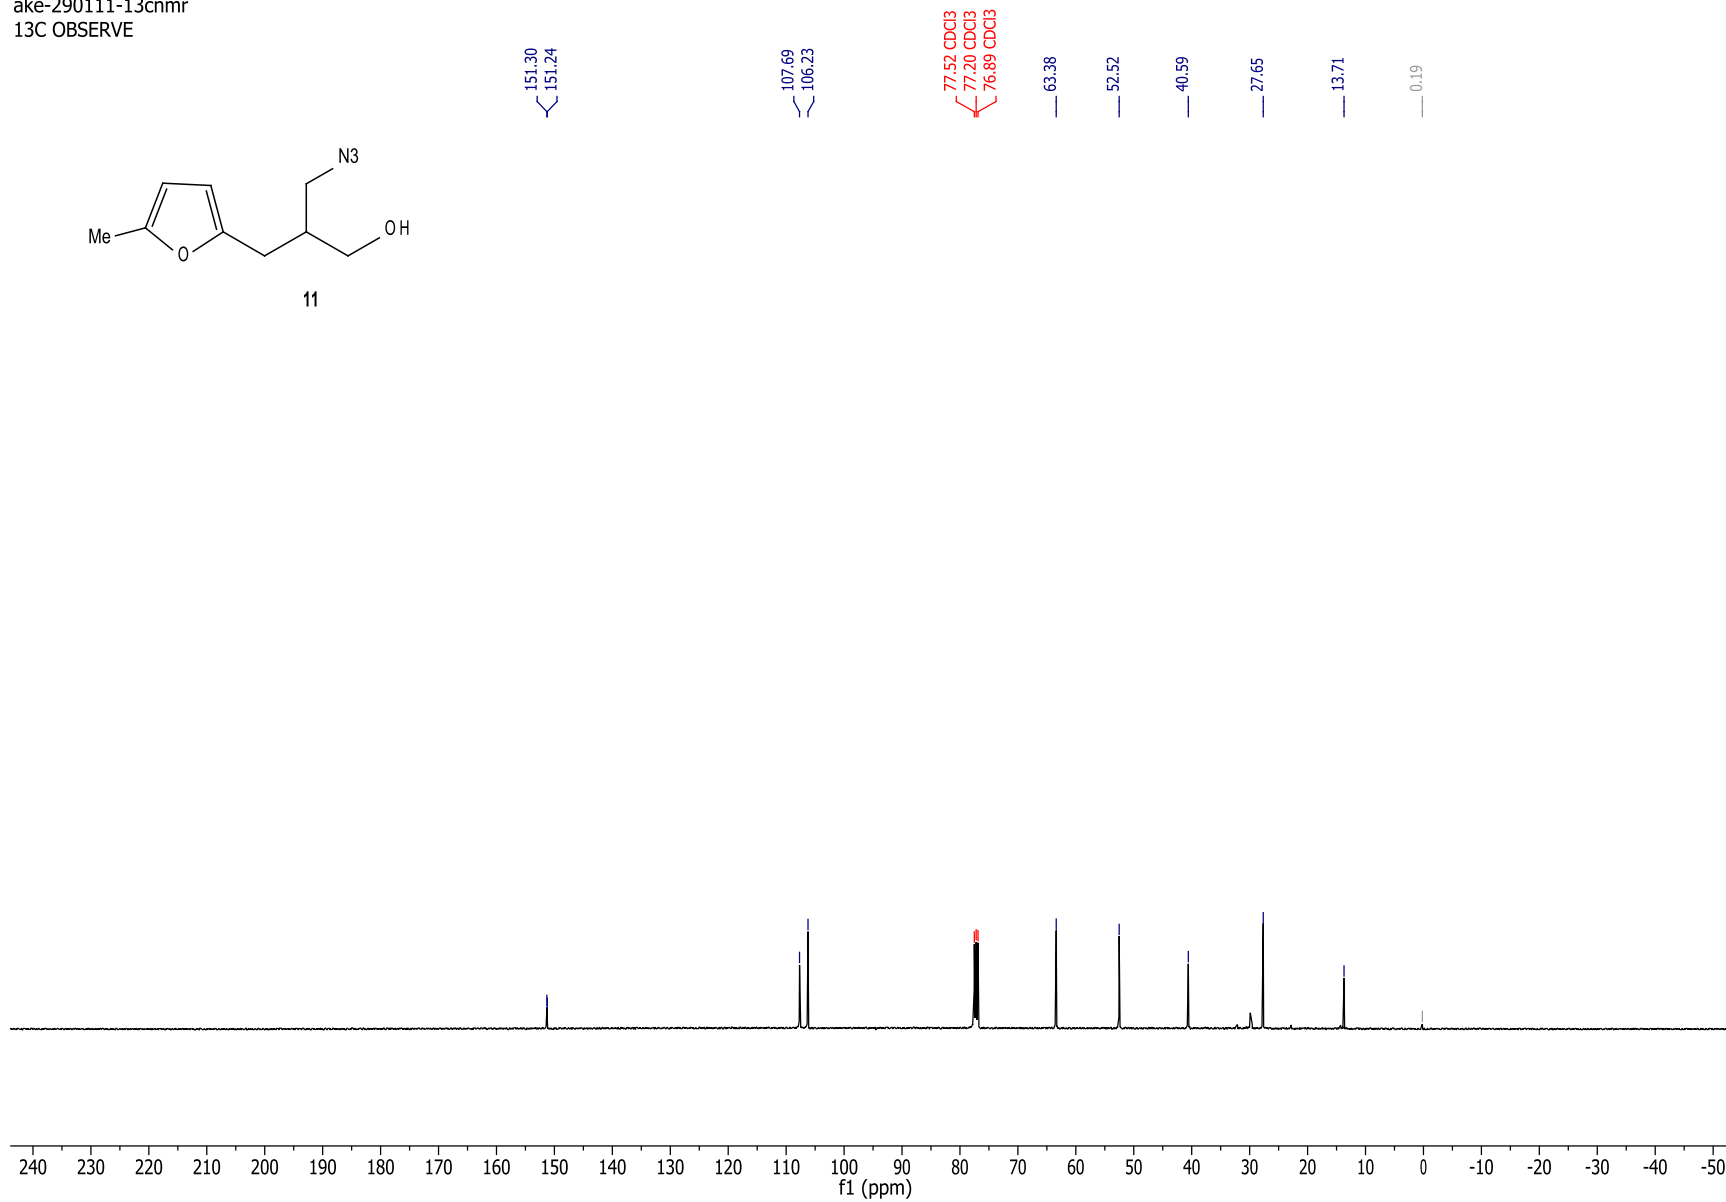

ean-030211-1hnmr  
STANDARD 1H OBSERVE

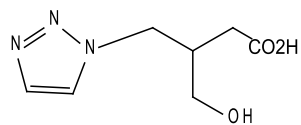

12

7.75

7.59

7.31

7.26 CDCl<sub>3</sub>

7.21

4.49

4.48

4.46

4.45

4.44

4.42

4.20

4.19

4.18

4.17

3.31

3.29

3.28

3.26

3.24

2.78

2.76

2.73

2.71

2.42

2.40

2.38

2.36

1.59 H<sub>2</sub>O

1.24

0.05

0.00

-0.01

-0.06

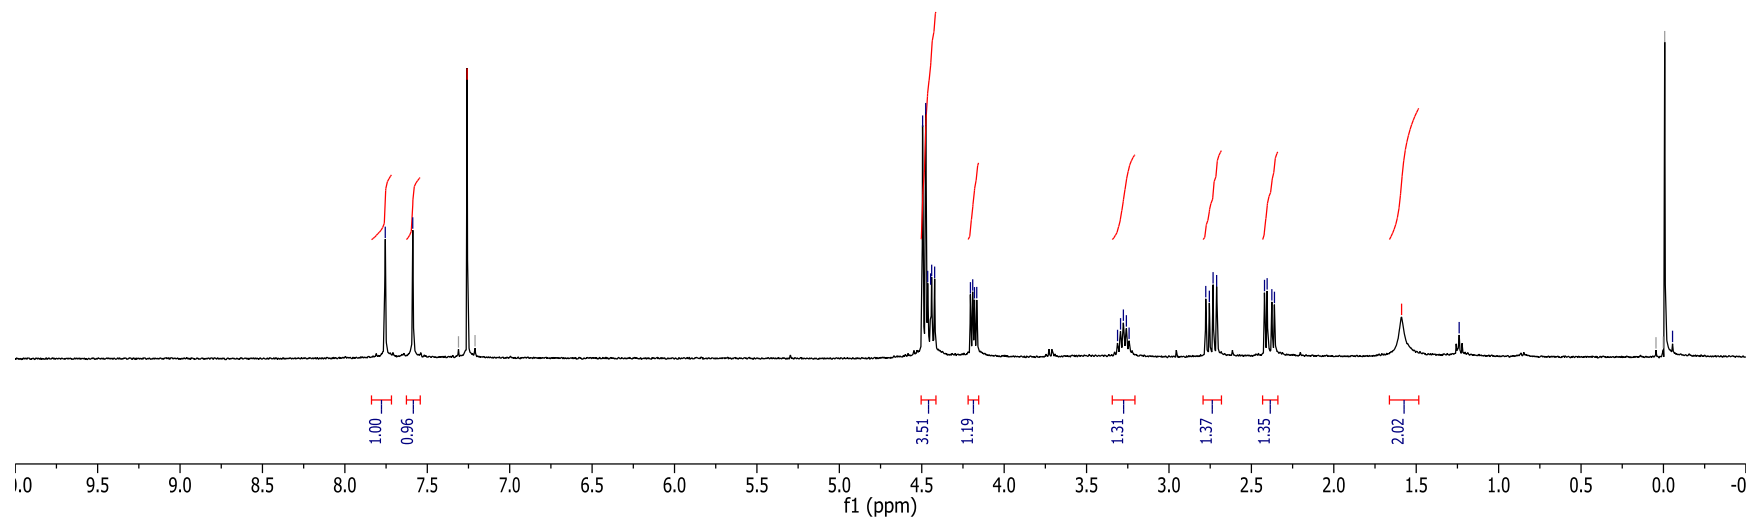

| INDEX | FREQUENCY | PPM     | HEIGHT |
|-------|-----------|---------|--------|
| 1     | 17625.220 | 175.340 | 3.5    |
| 2     | 13509.822 | 134.399 | 20.6   |
| 3     | 12489.983 | 124.254 | 14.3   |
| 4     | 7820.191  | 77.797  | 3.4    |
| 5     | 7797.953  | 77.576  | 28.6   |
| 6     | 7787.218  | 77.469  | 5.0    |
| 7     | 7765.748  | 77.256  | 30.7   |
| 8     | 7755.780  | 77.156  | 4.8    |
| 9     | 7733.543  | 76.935  | 29.8   |
| 10    | 7086.366  | 70.497  | 27.0   |
| 11    | 5193.145  | 51.663  | 22.9   |
| 12    | 3658.785  | 36.399  | 22.9   |
| 13    | 3238.580  | 32.218  | 27.3   |

~~NIKAZAO~~ Star 4  
 2a-638

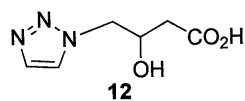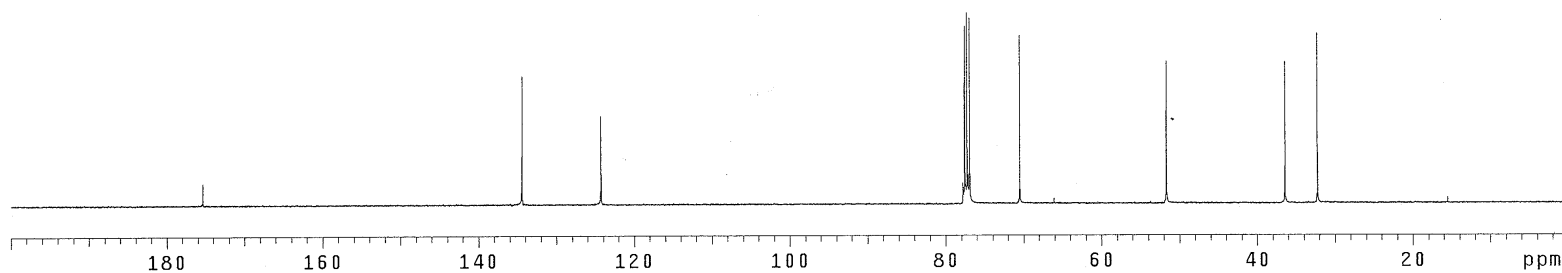

mku-416-1hnmr  
STANDARD-1H OBSERV

7.58  
7.57  
7.56  
7.55  
7.54  
7.53  
7.52  
7.51  
7.50  
7.49  
7.48  
7.47  
7.46  
7.45  
7.44  
7.43  
7.42  
7.41  
7.40  
7.39  
7.38  
7.37  
7.36  
7.35  
7.34  
7.33  
7.32  
7.31  
7.30  
7.29  
7.28  
7.27  
7.26  
7.25  
7.24  
7.23  
7.22  
7.21  
7.20  
7.19  
7.18  
7.17  
7.16  
7.15  
6.52  
6.51  
6.51

4.46  
4.44  
4.42

3.71  
3.66  
3.61  
3.32  
3.30  
3.28

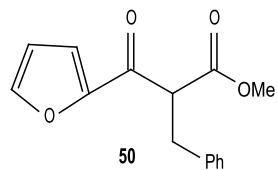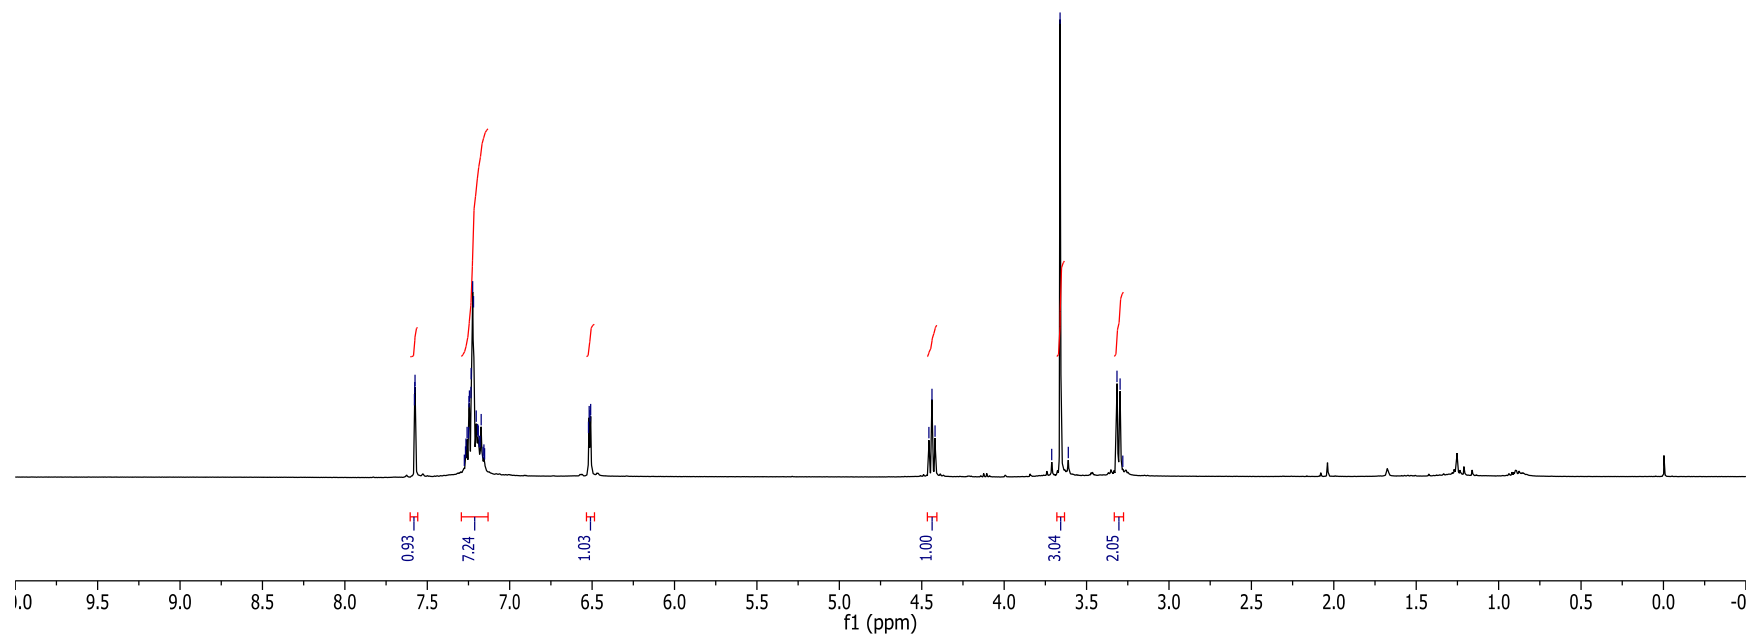



mku-416-13cnmr  
13C OBSERVE

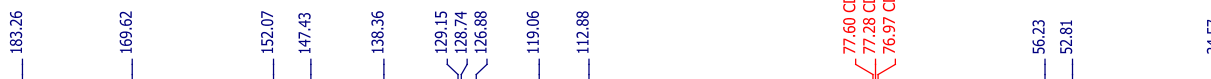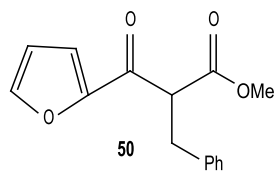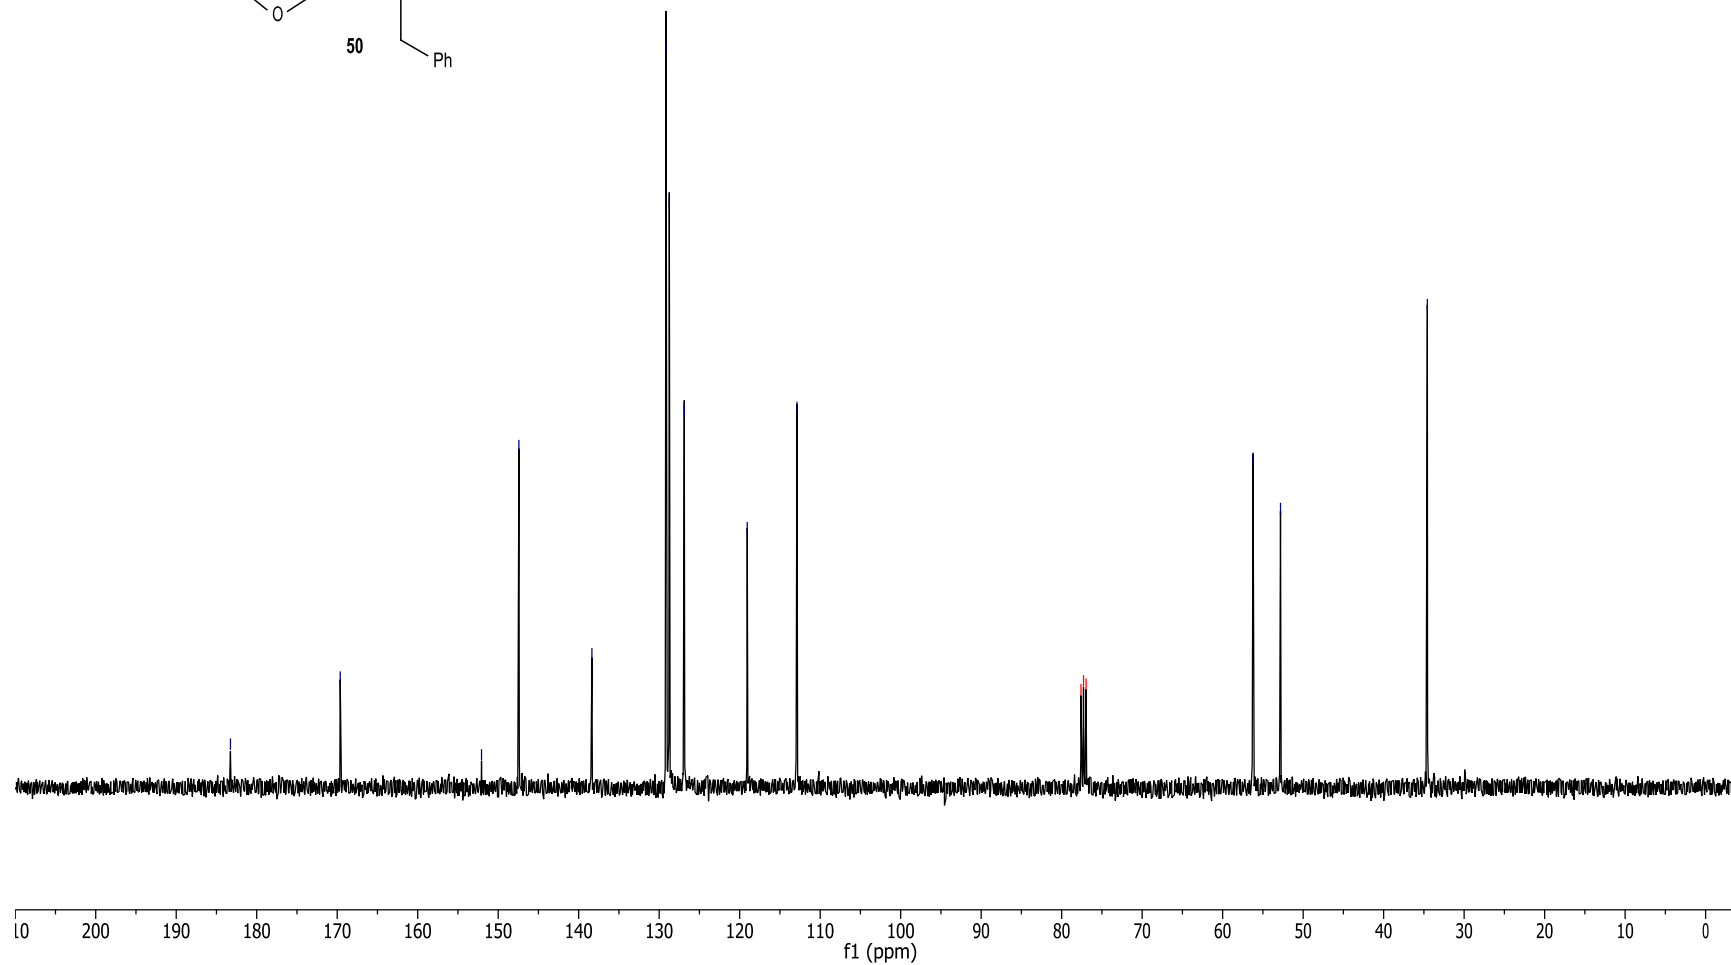

ean-140711-1hnmr  
STANDARD 1H OBSERVE

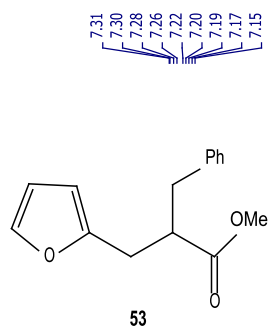

7.31  
7.30  
7.28  
7.26  
7.22  
7.20  
7.19  
7.17  
7.15

6.27  
6.27  
6.26  
6.03  
6.03

3.58  
3.09  
3.07  
3.06  
3.04  
3.02  
3.01  
2.99  
2.97  
2.95  
2.86  
2.84  
2.83  
2.82  
2.81  
2.80  
2.78

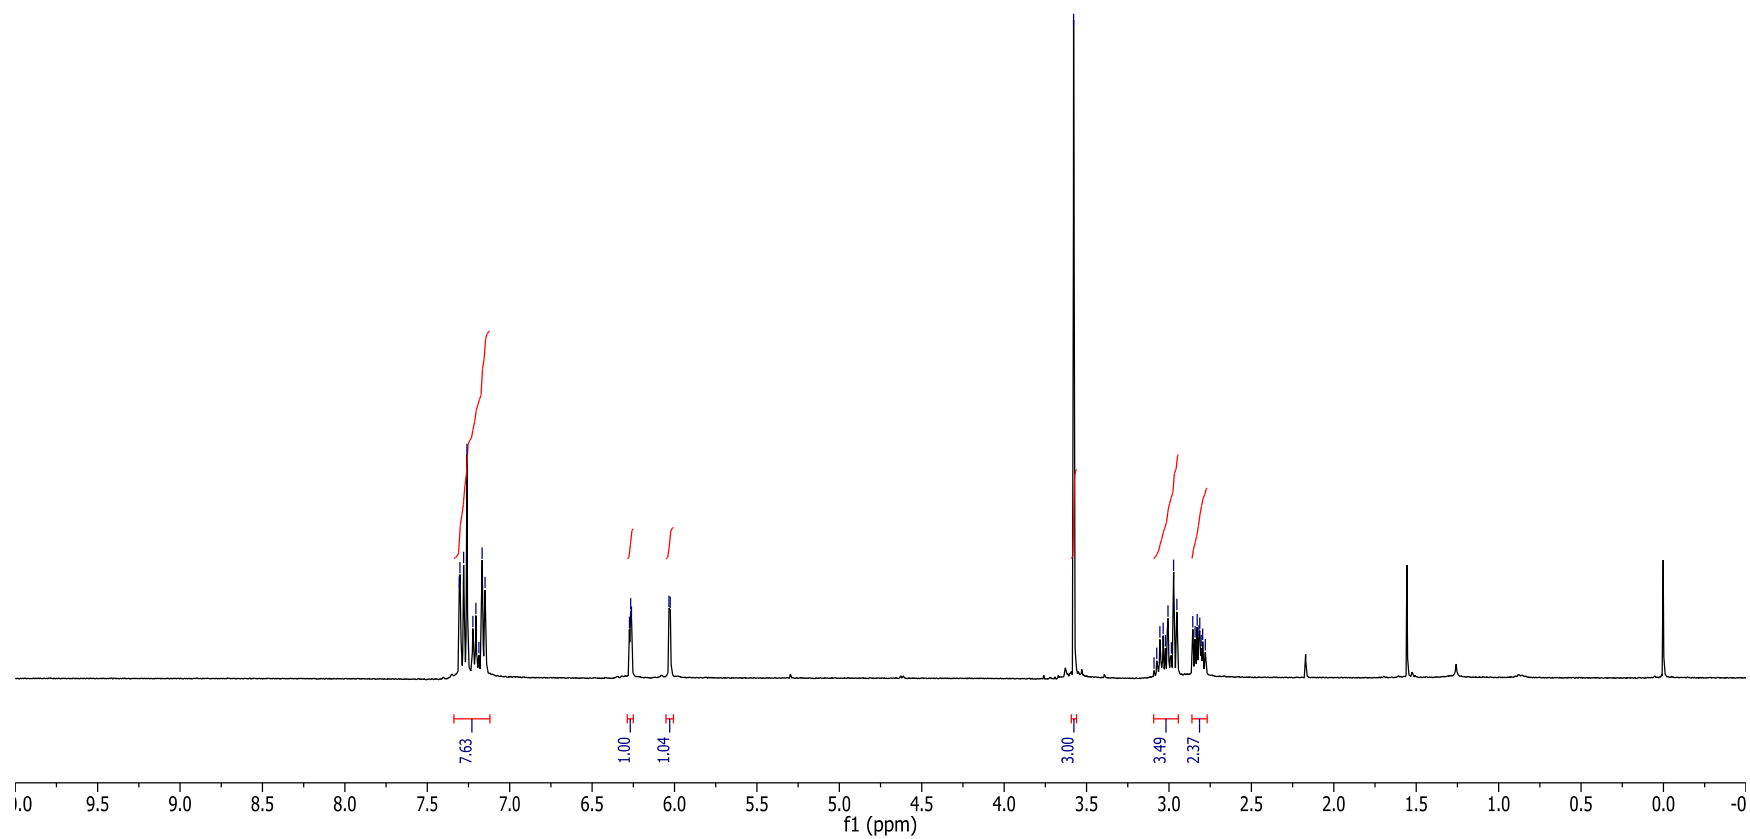

ean-140711-13cnmr  
13C OBSERVE

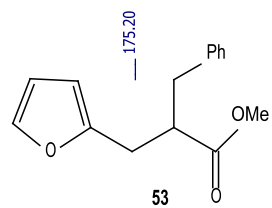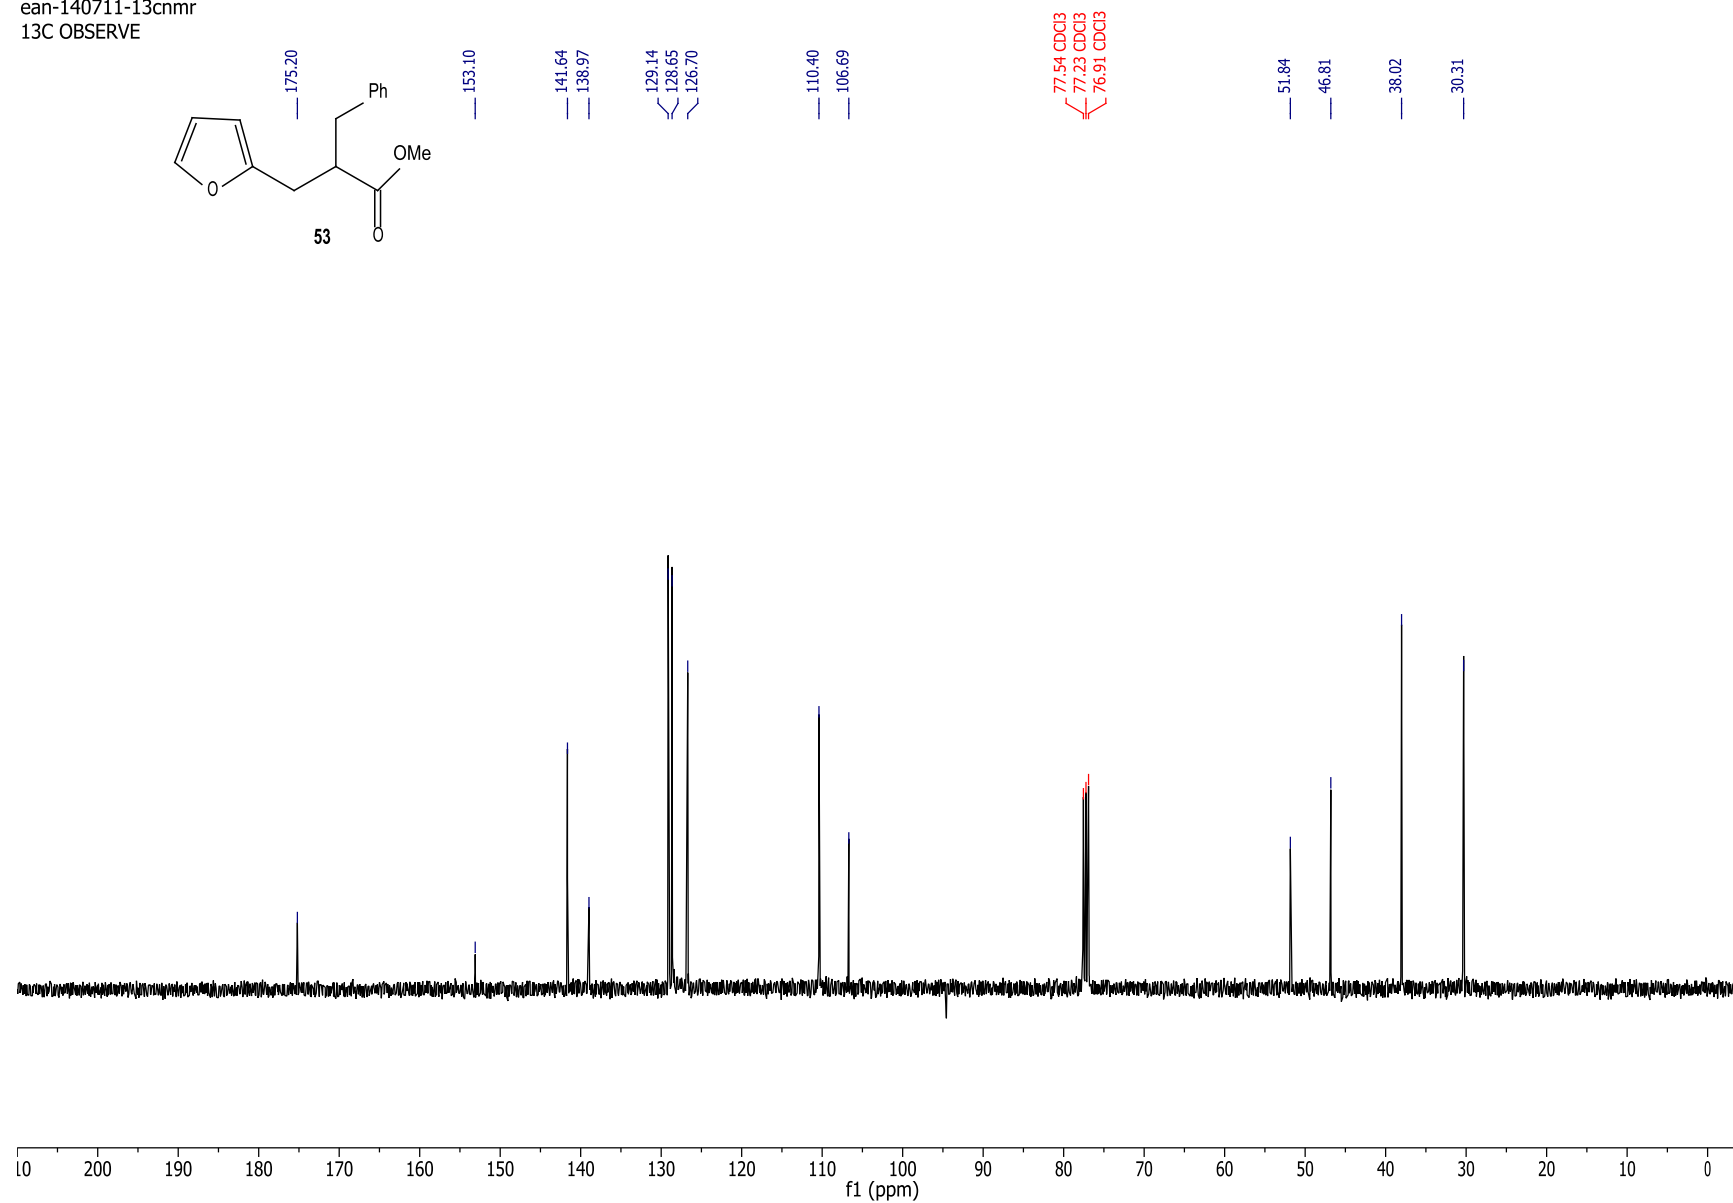

Mustafa  
Lialh4

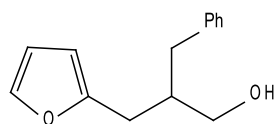

54

7.31  
7.30  
7.29  
7.29  
7.28  
7.27  
7.26  
7.25  
7.22  
7.19  
7.19  
7.19  
7.18  
7.17  
7.16  
6.28  
6.28  
6.27  
6.03  
6.02

3.52  
3.51  
3.50  
3.48  
3.47  
3.46  
3.45  
3.44  
2.73  
2.72  
2.70  
2.69  
2.68  
2.67  
2.66  
2.64  
2.64  
2.62  
2.60  
2.60  
2.59  
2.23  
2.22  
2.22  
2.20  
2.19  
2.17  
2.16  
2.15  
1.88  
1.83

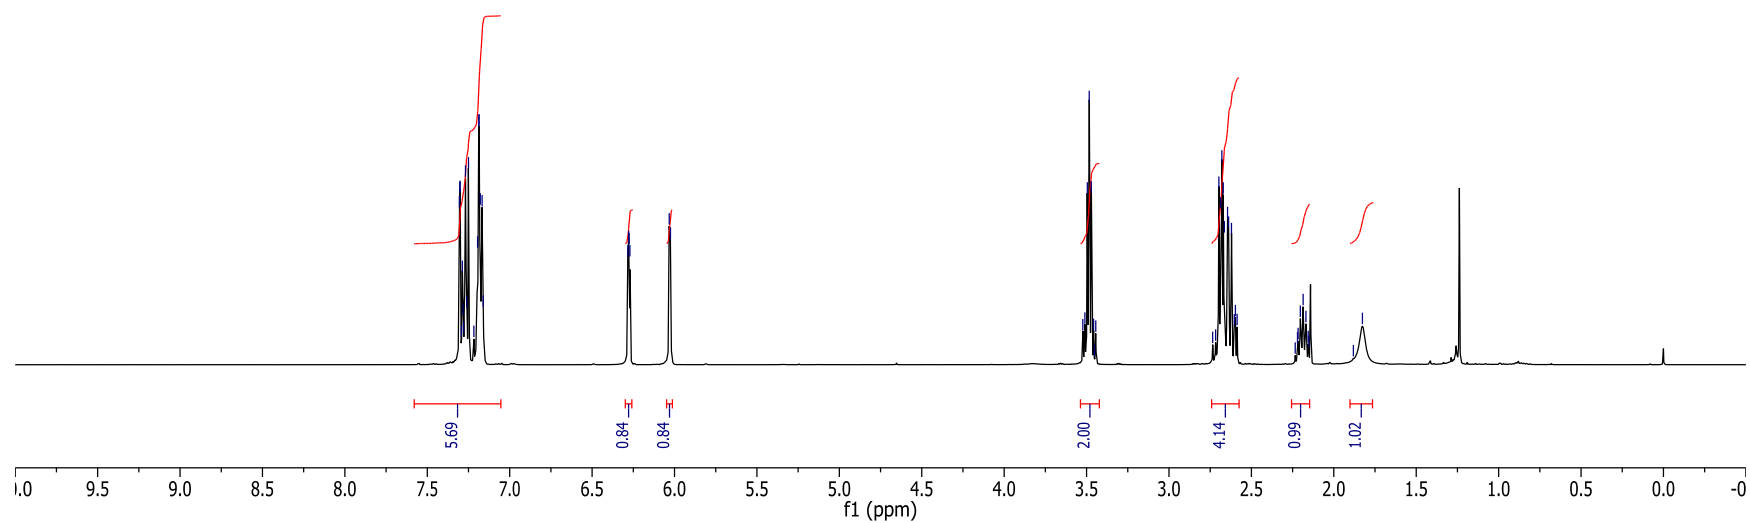

Mustafa  
Lialh4

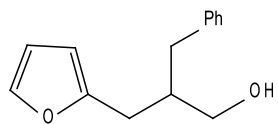

54

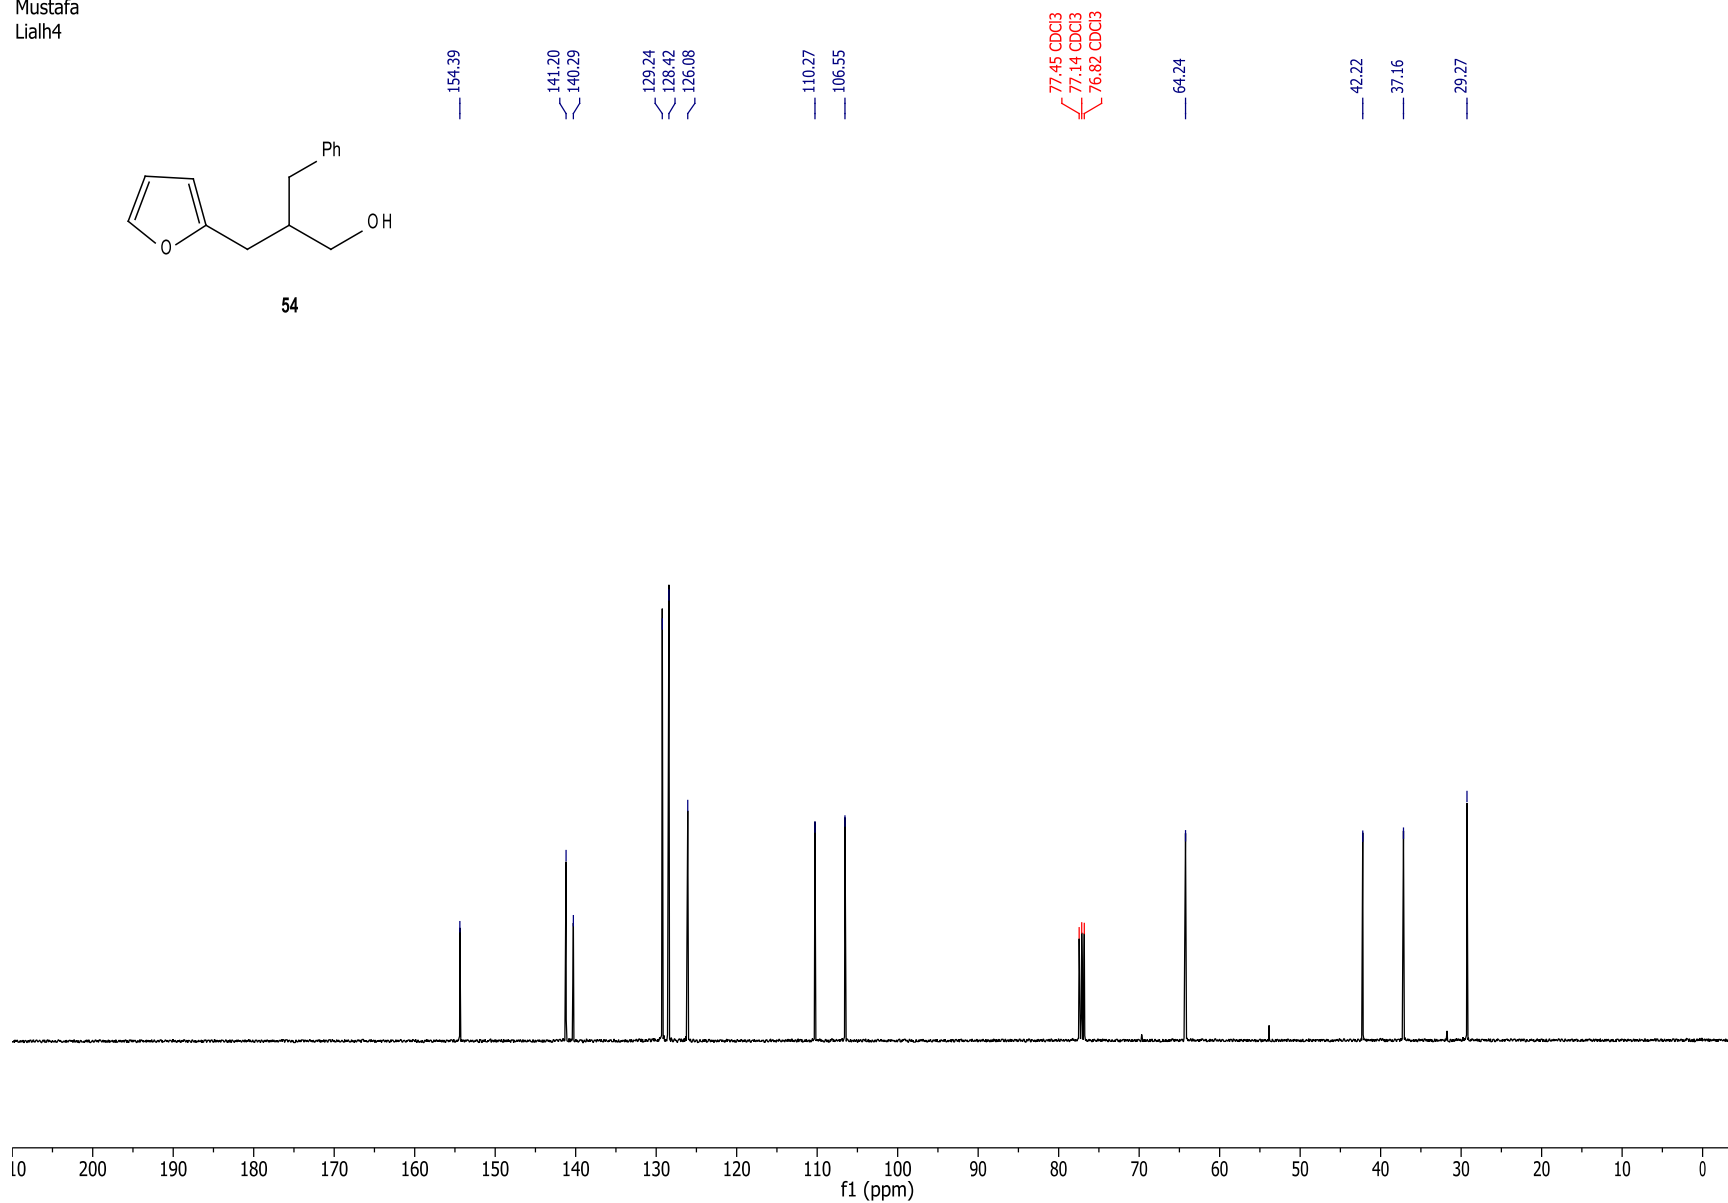

Mustafa  
N3

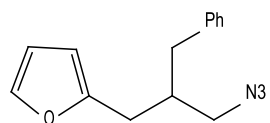

13

7.34  
7.34  
7.34  
7.32  
7.30  
7.29  
7.28  
7.26  
7.23  
7.22  
7.22  
7.21  
7.20  
7.19  
7.17  
6.31  
6.31  
6.30  
6.30  
6.07  
6.06

3.22  
3.21  
2.71  
2.69  
2.67  
2.65  
2.30  
2.29  
2.29  
2.27  
2.27  
2.25  
2.25  
2.24  
2.24  
2.22  
2.22  
2.21

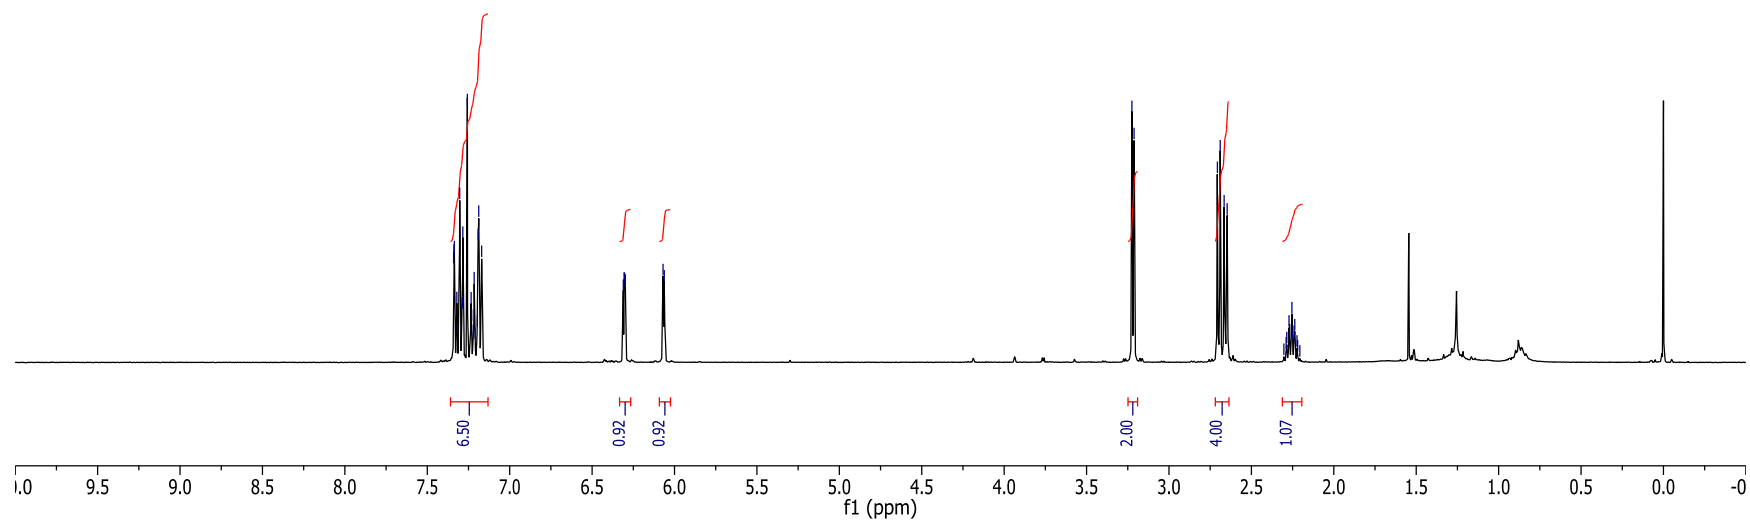

Mustafa  
N3

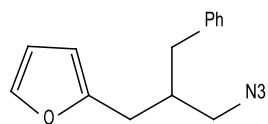

13

153.45

141.43  
139.44

129.21  
128.51  
126.31

110.25  
106.97

77.38 CDCl<sub>3</sub>  
77.07 CDCl<sub>3</sub>  
76.75 CDCl<sub>3</sub>

53.52

39.97  
37.76

30.01

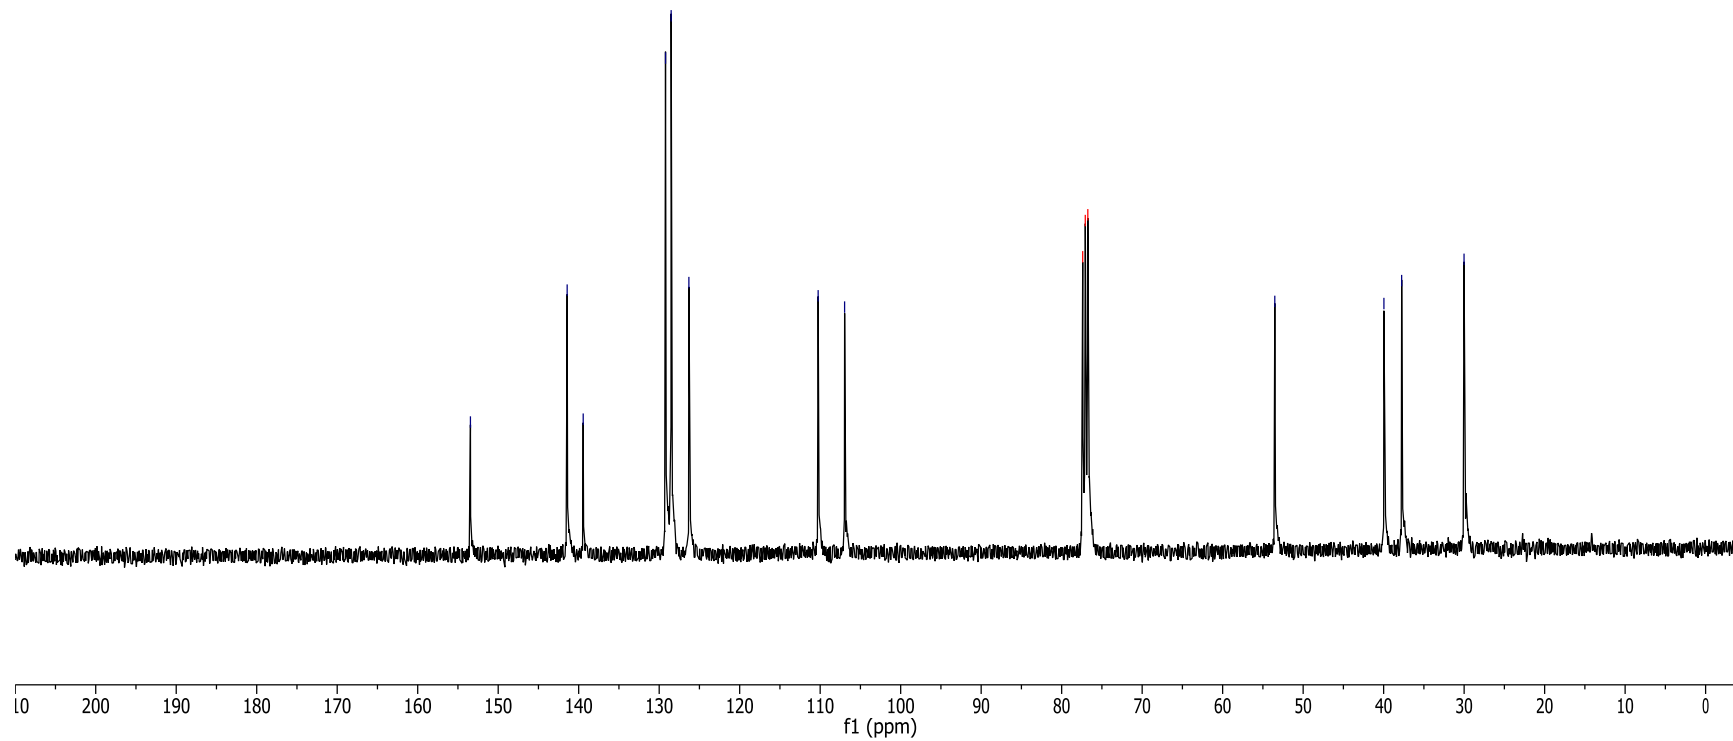

ean-2-310111-1hnmr  
STANDARD 1H OBSERVE

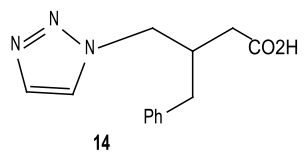

7.73  
7.56  
7.34  
7.32  
7.30  
7.28  
7.26  
7.24  
7.22  
7.21  
7.19

4.46  
4.45

2.81  
2.79  
2.77  
2.76  
2.74  
2.71  
2.69  
2.64  
2.40  
2.39  
2.36  
2.35  
2.33  
2.30  
2.29

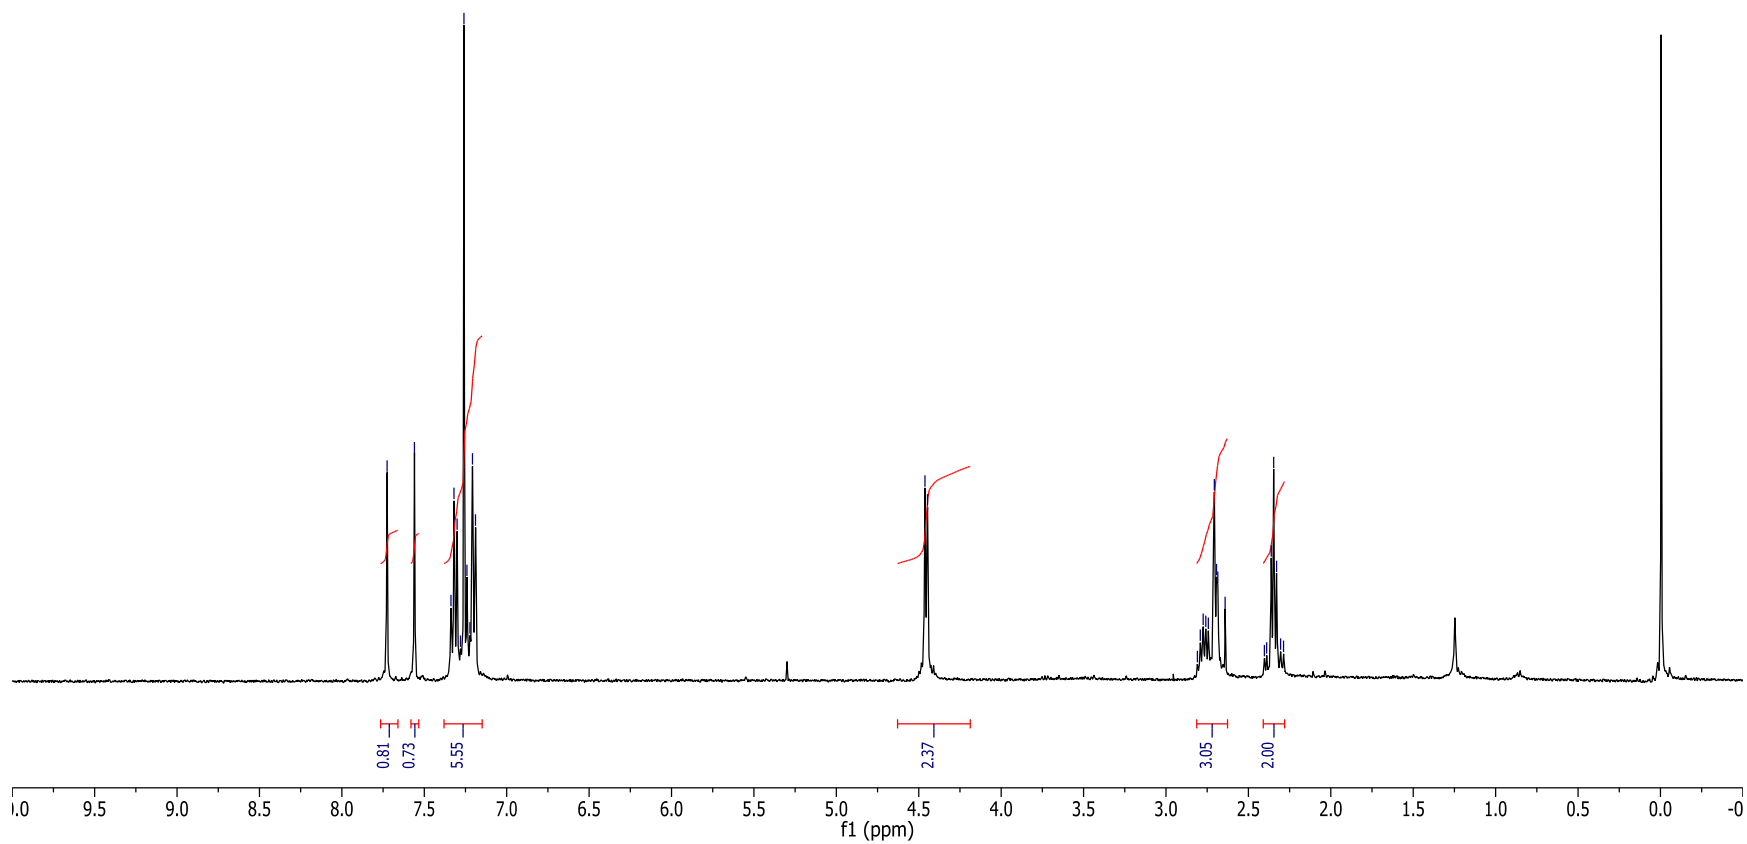

S100



ean-2-310111-13cnmr  
13C OBSERVE

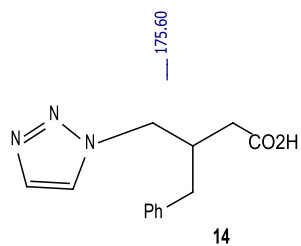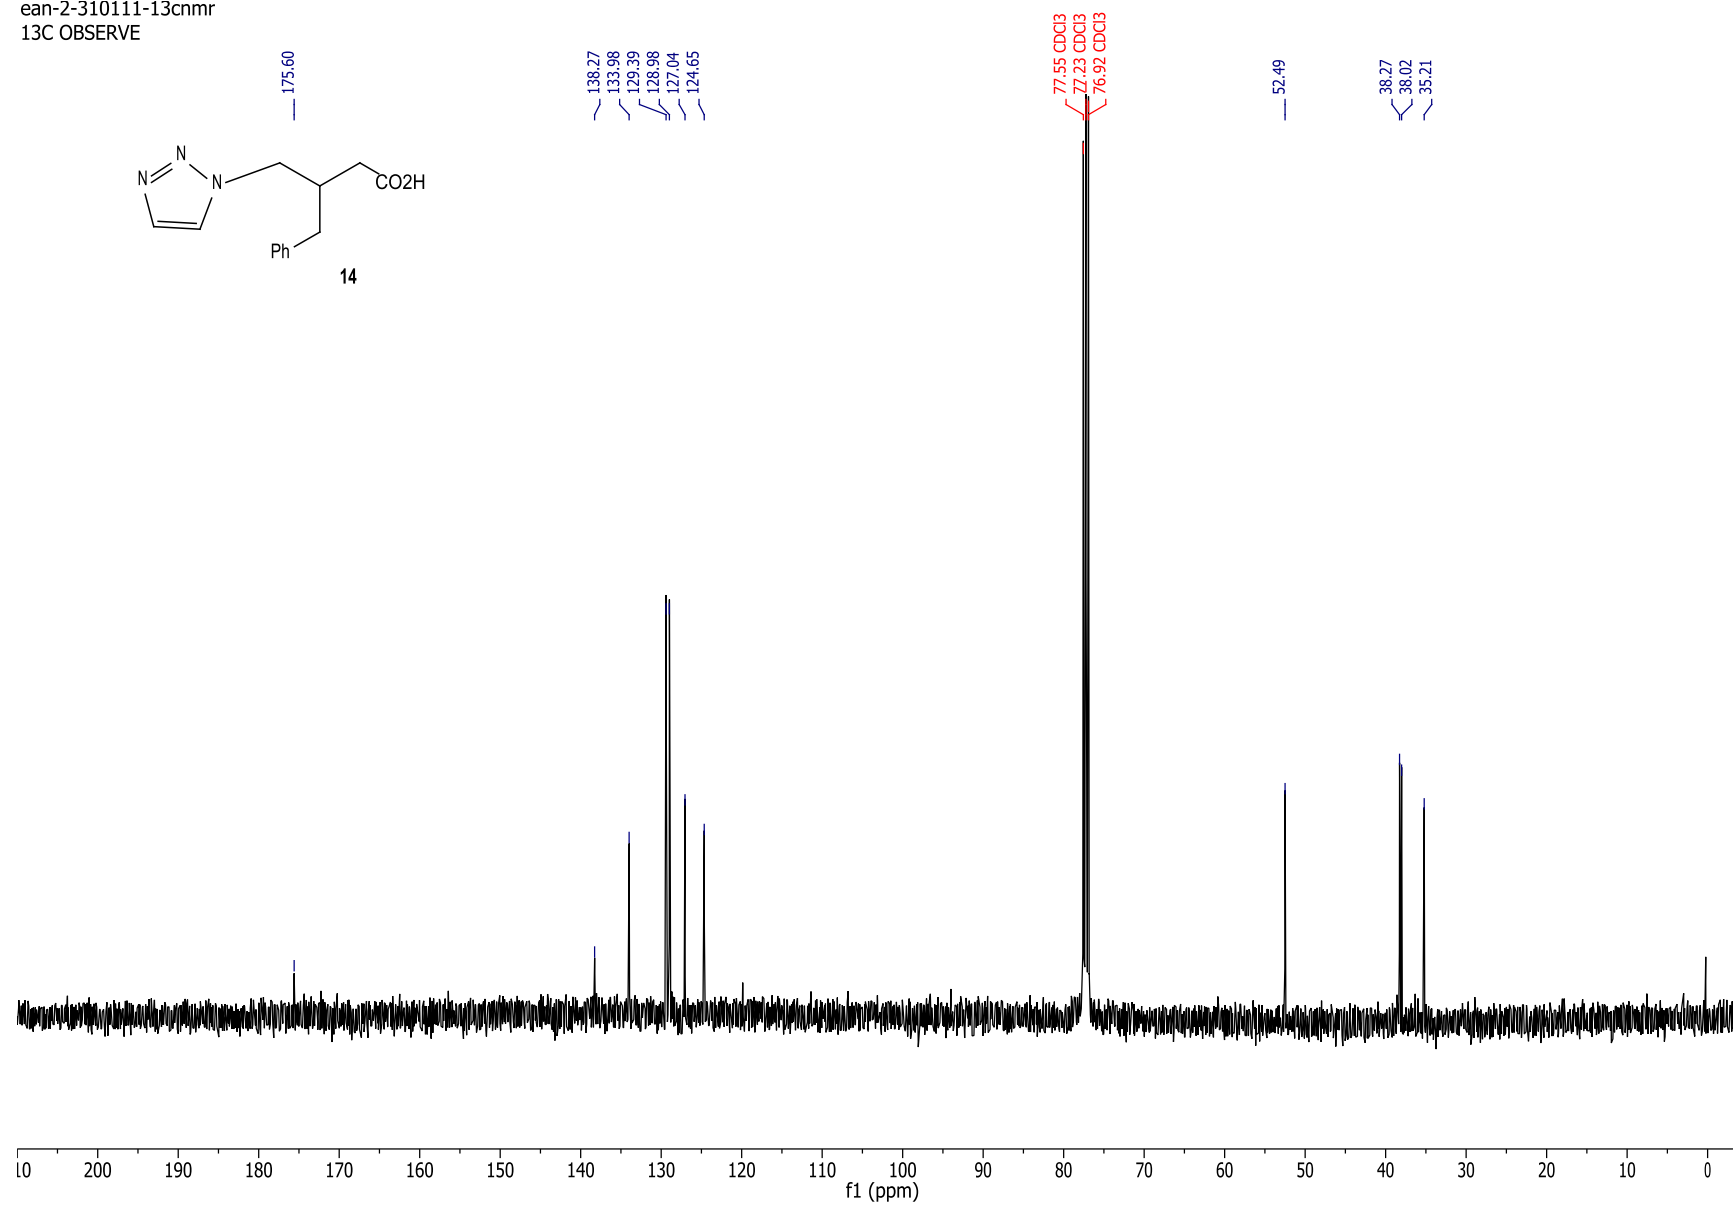

mku-220210-1hnmr  
STANDARD 1H OBSERVE

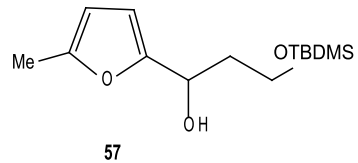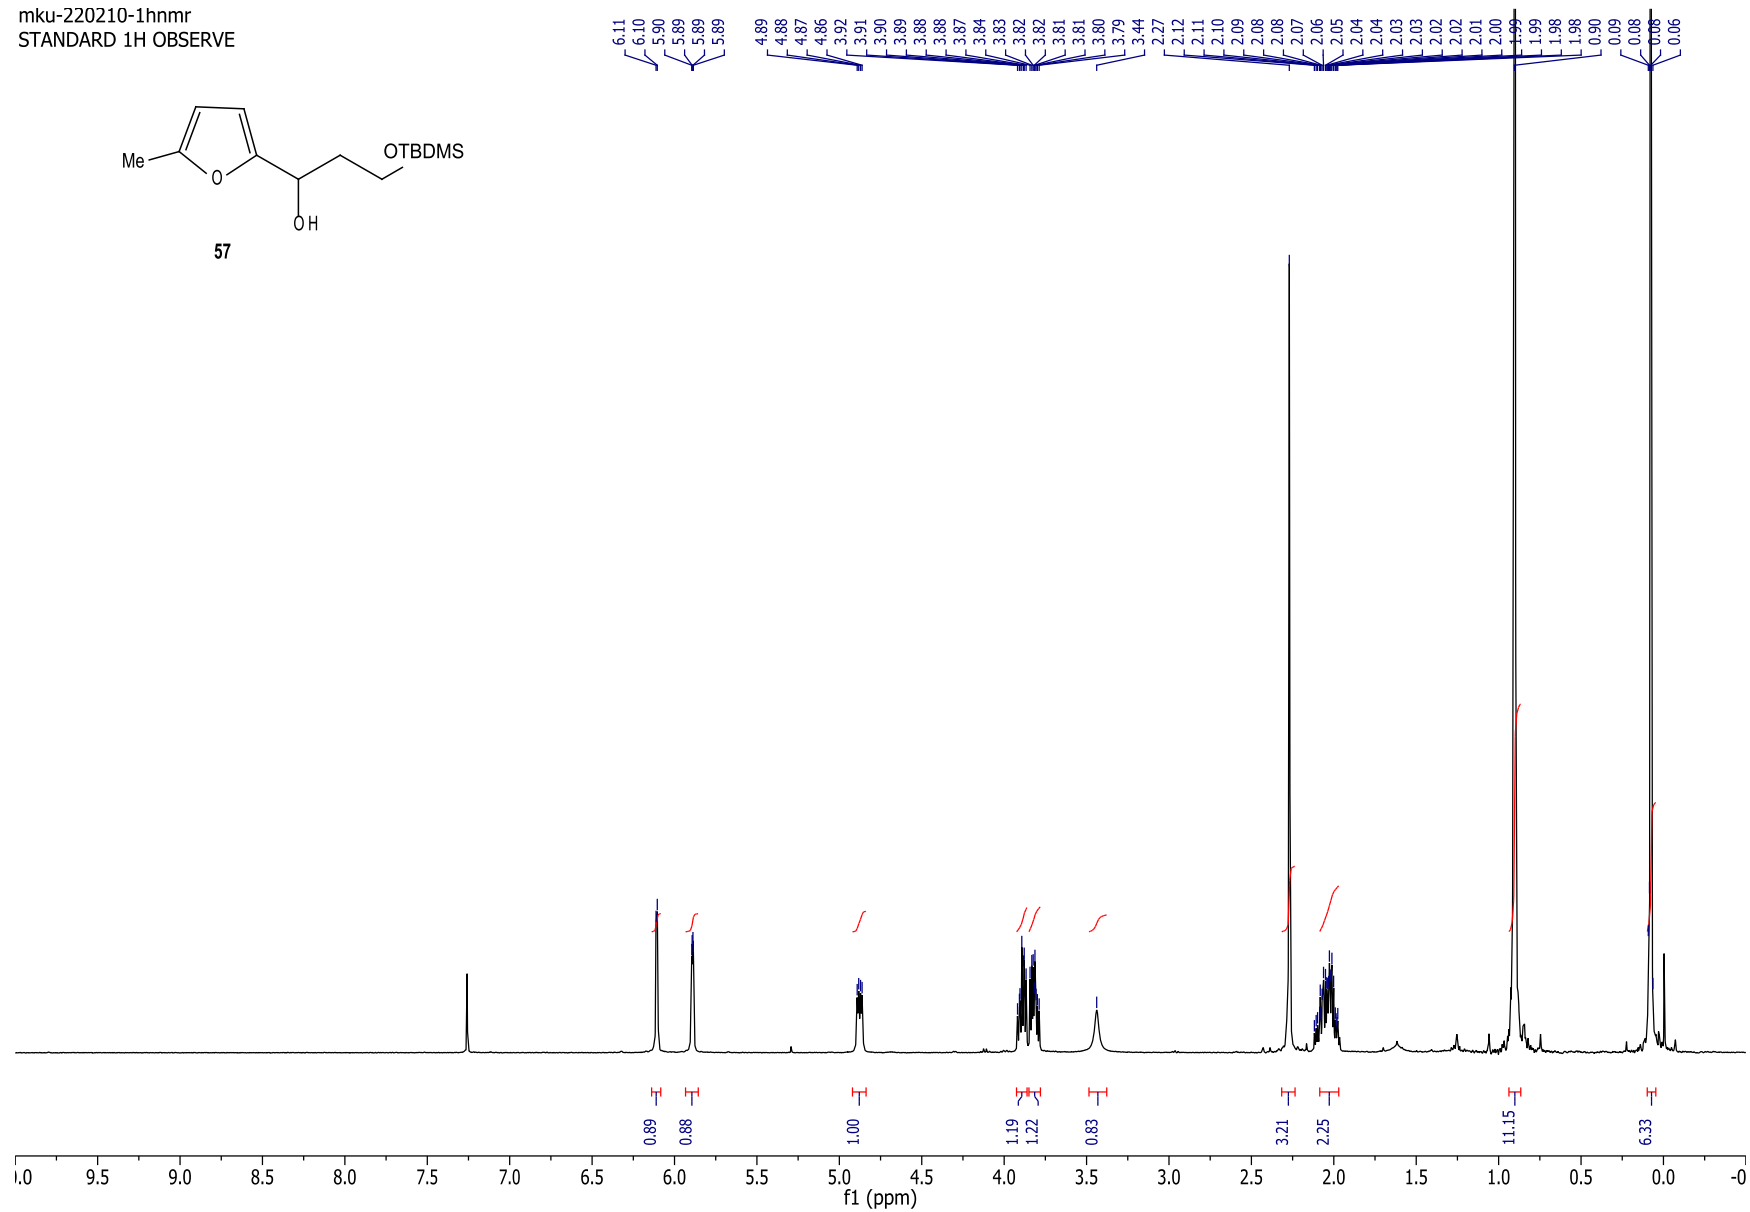

mku-220210-13cnmr  
13C OBSERVE

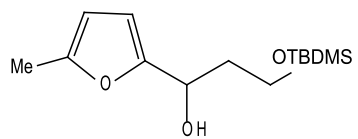

57

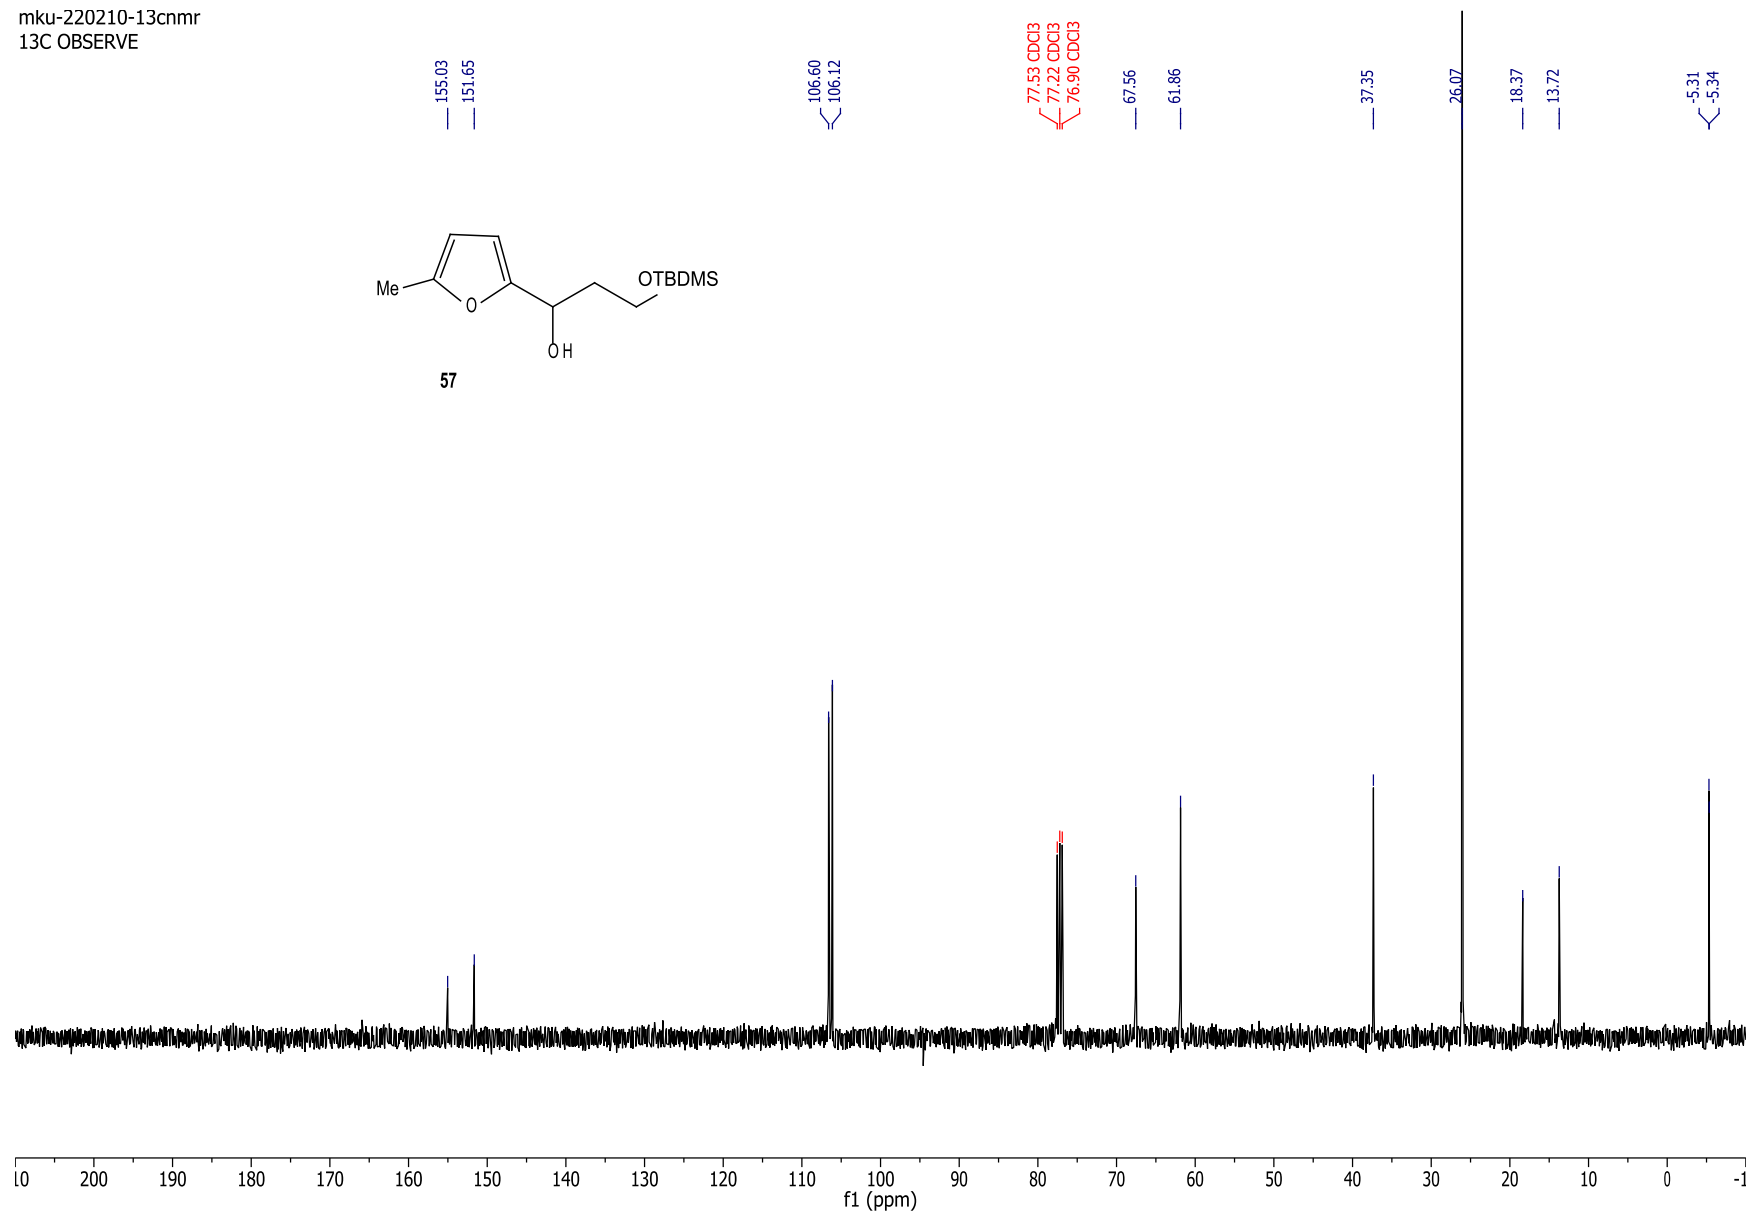

ean-250210-1hnmr  
STANDARD 1H OBSERVE

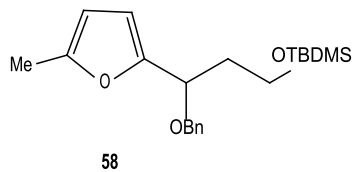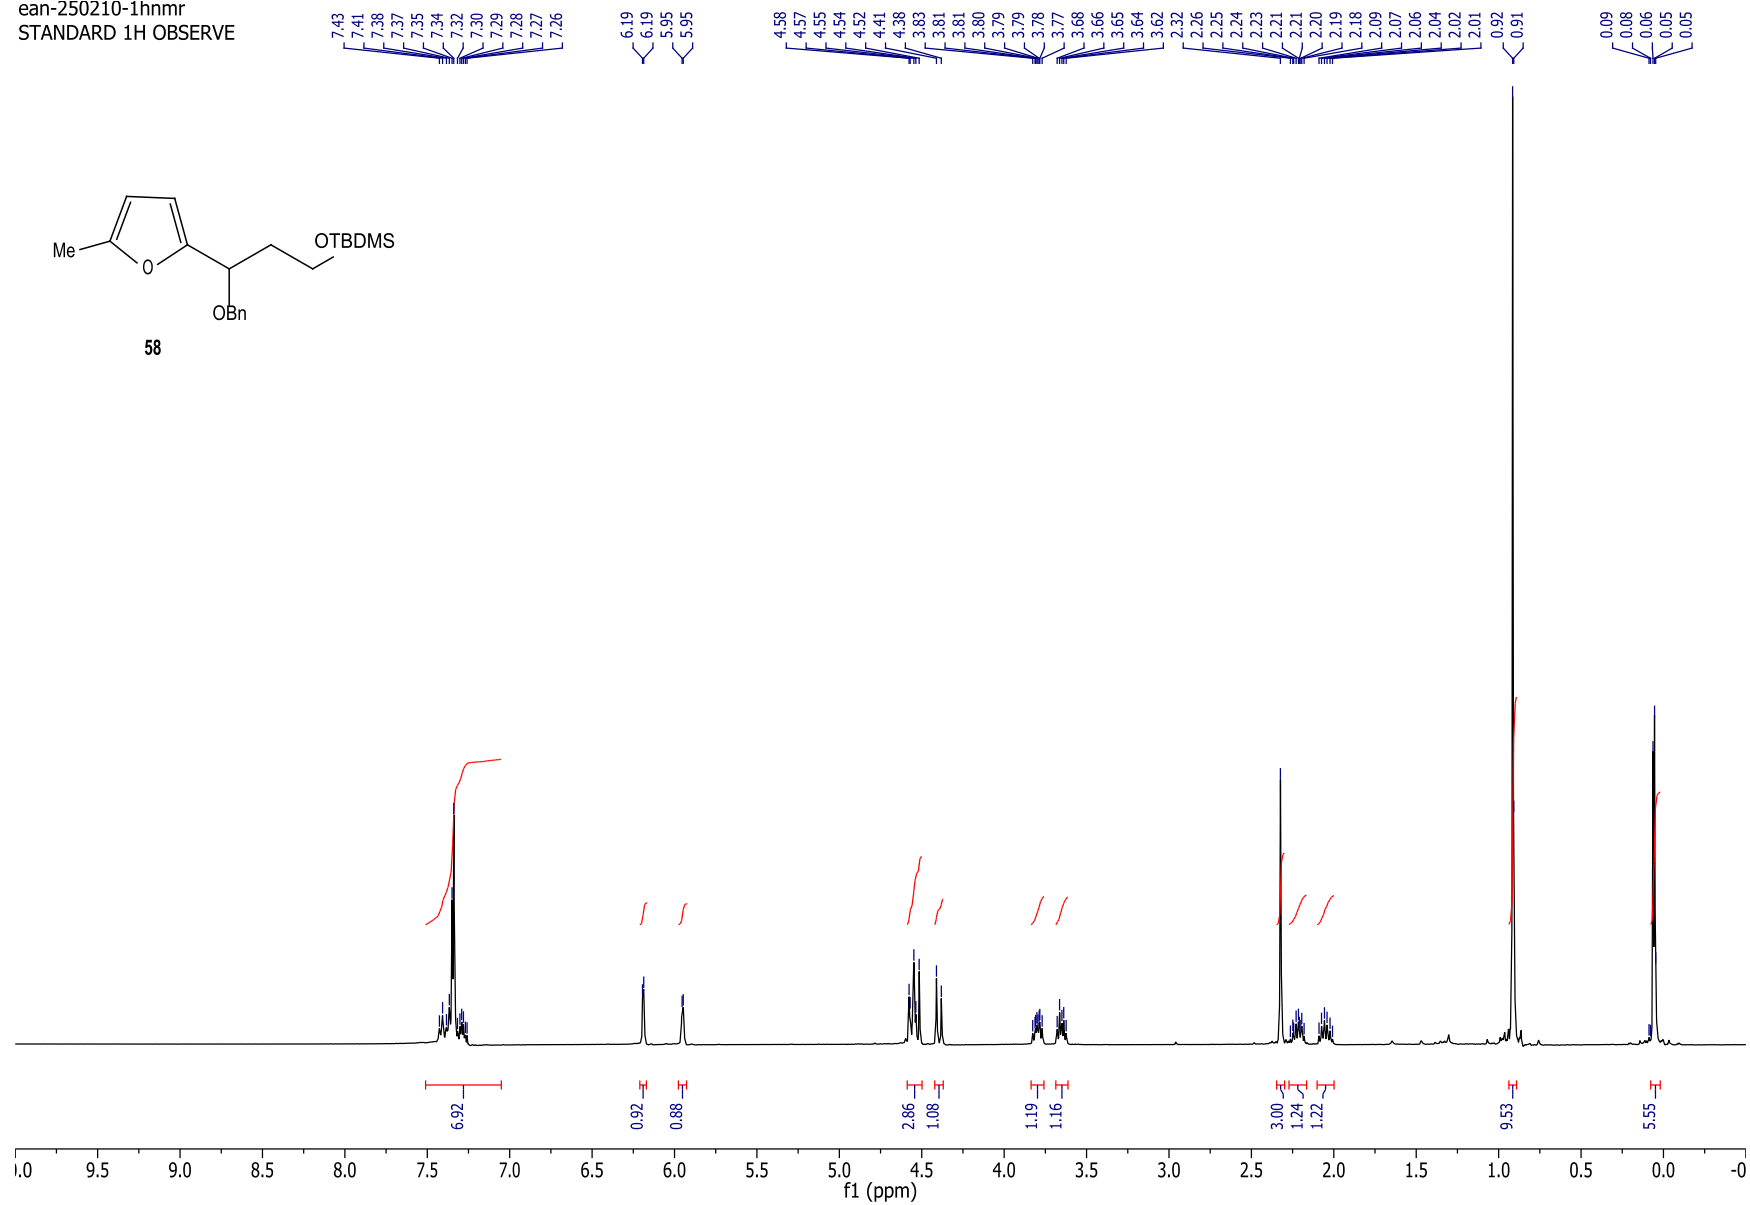

ean-250210-13cnmr  
13C OBSERVE

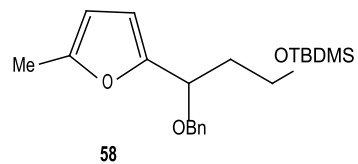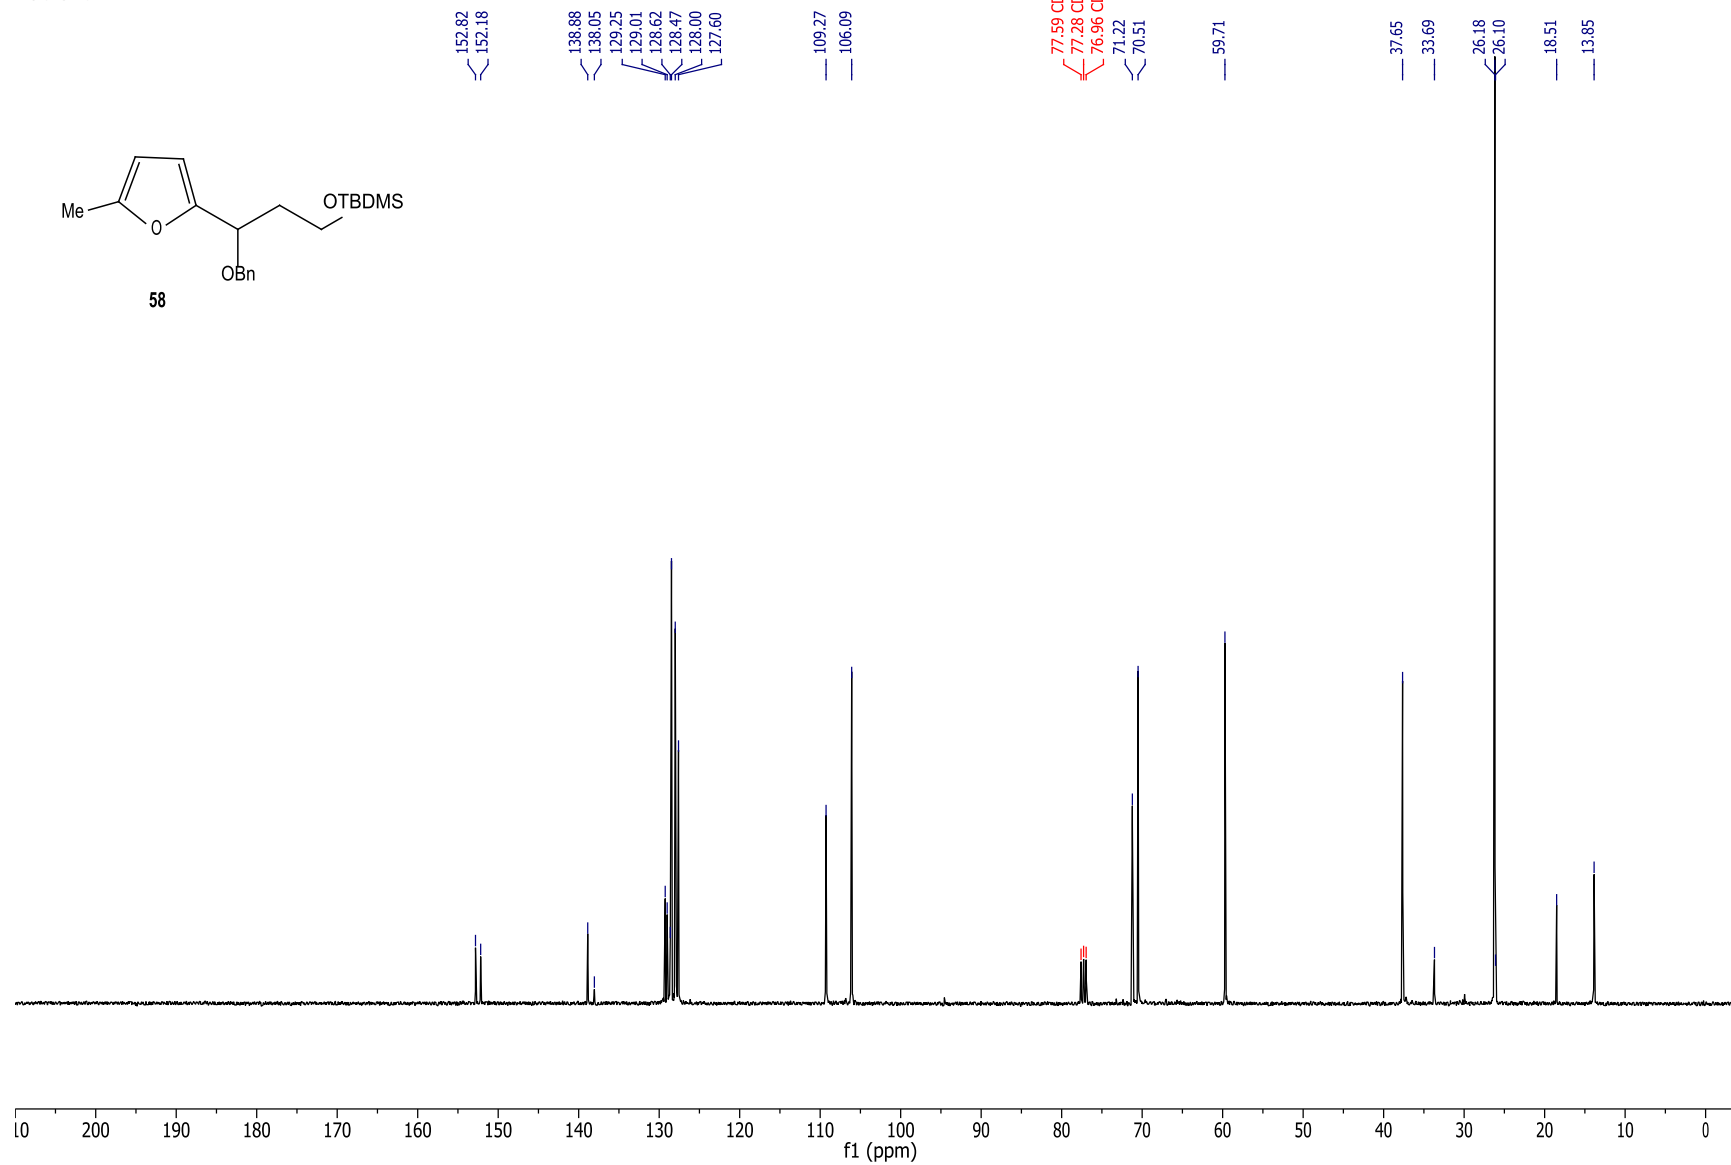

ean-270210-1hnmr  
STANDARD 1H OBSERVE

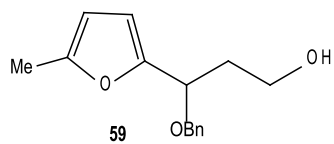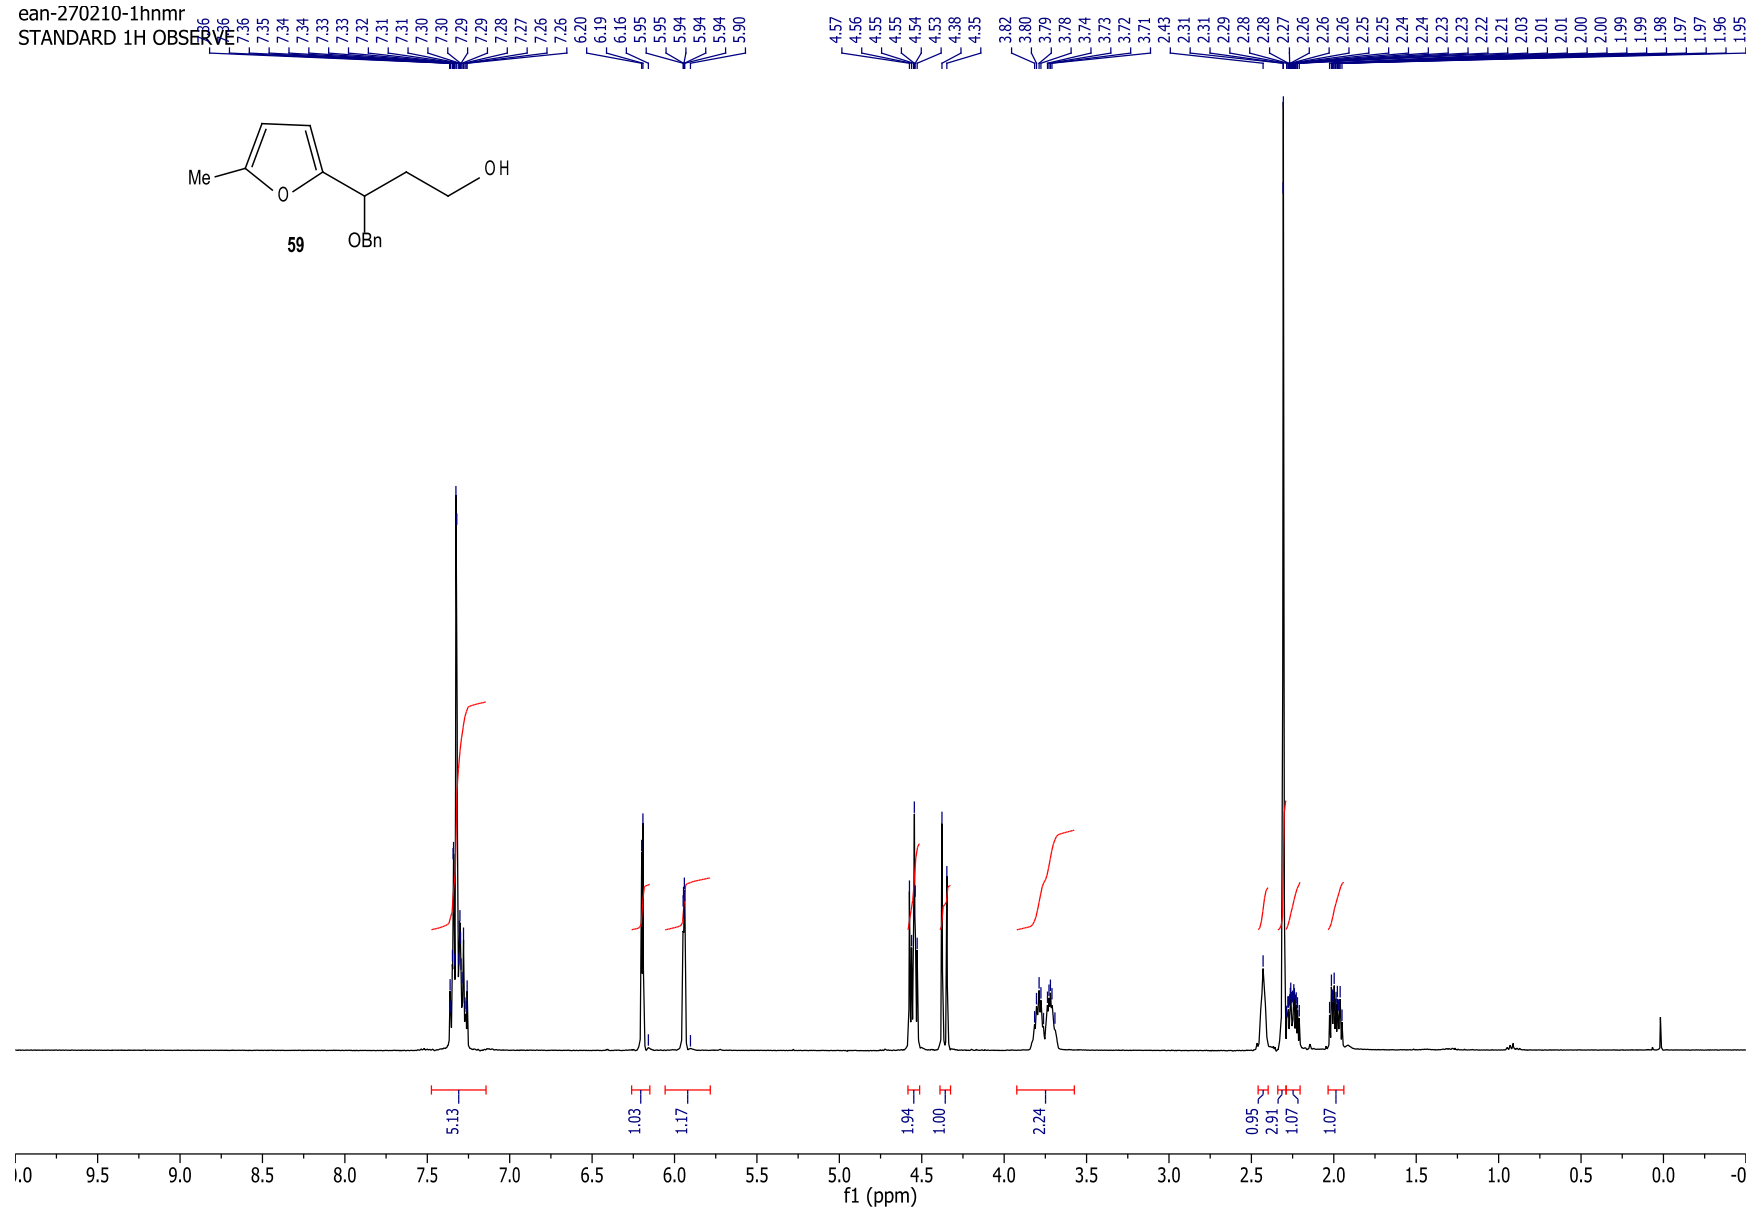

ean-270210-13cnmr  
13C OBSERVE

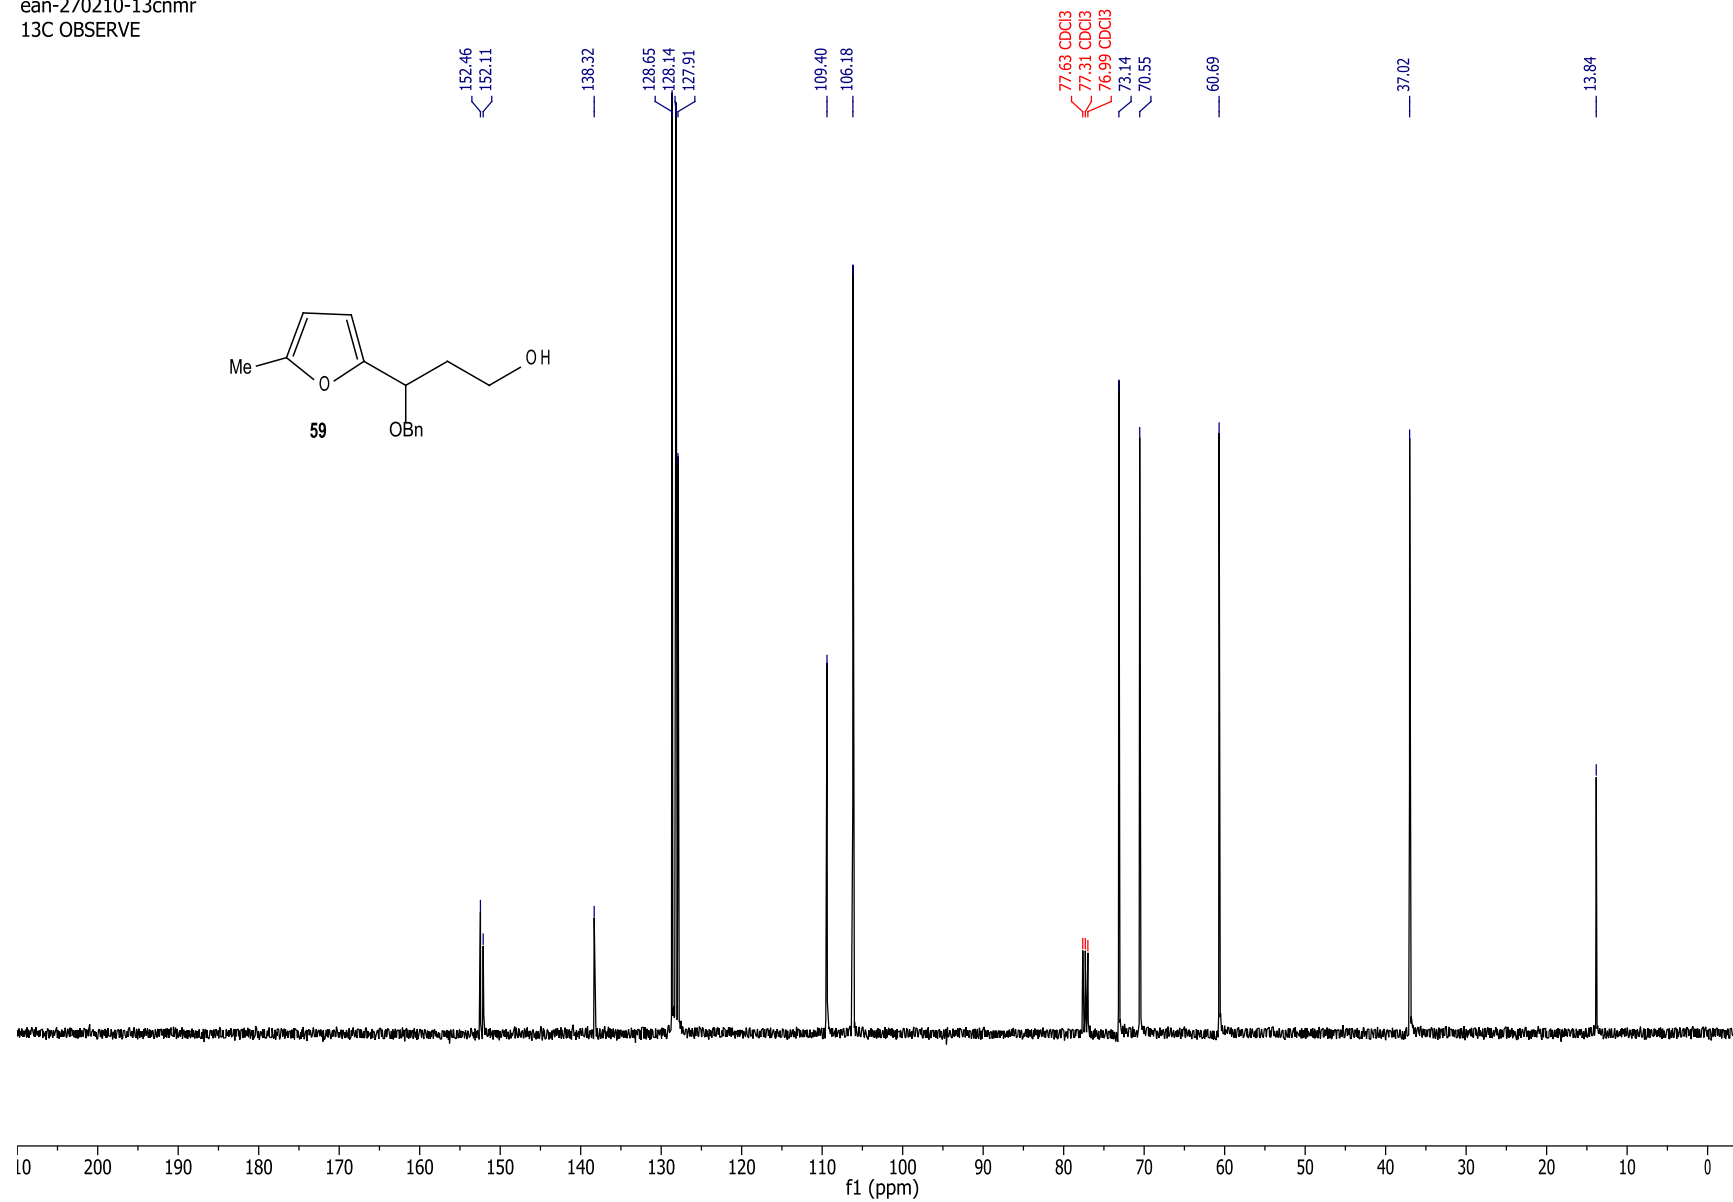

ean-020310-1hnmr  
STANDARD 1H OBSERVE

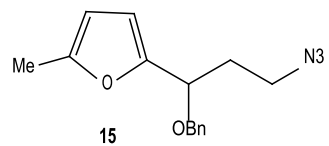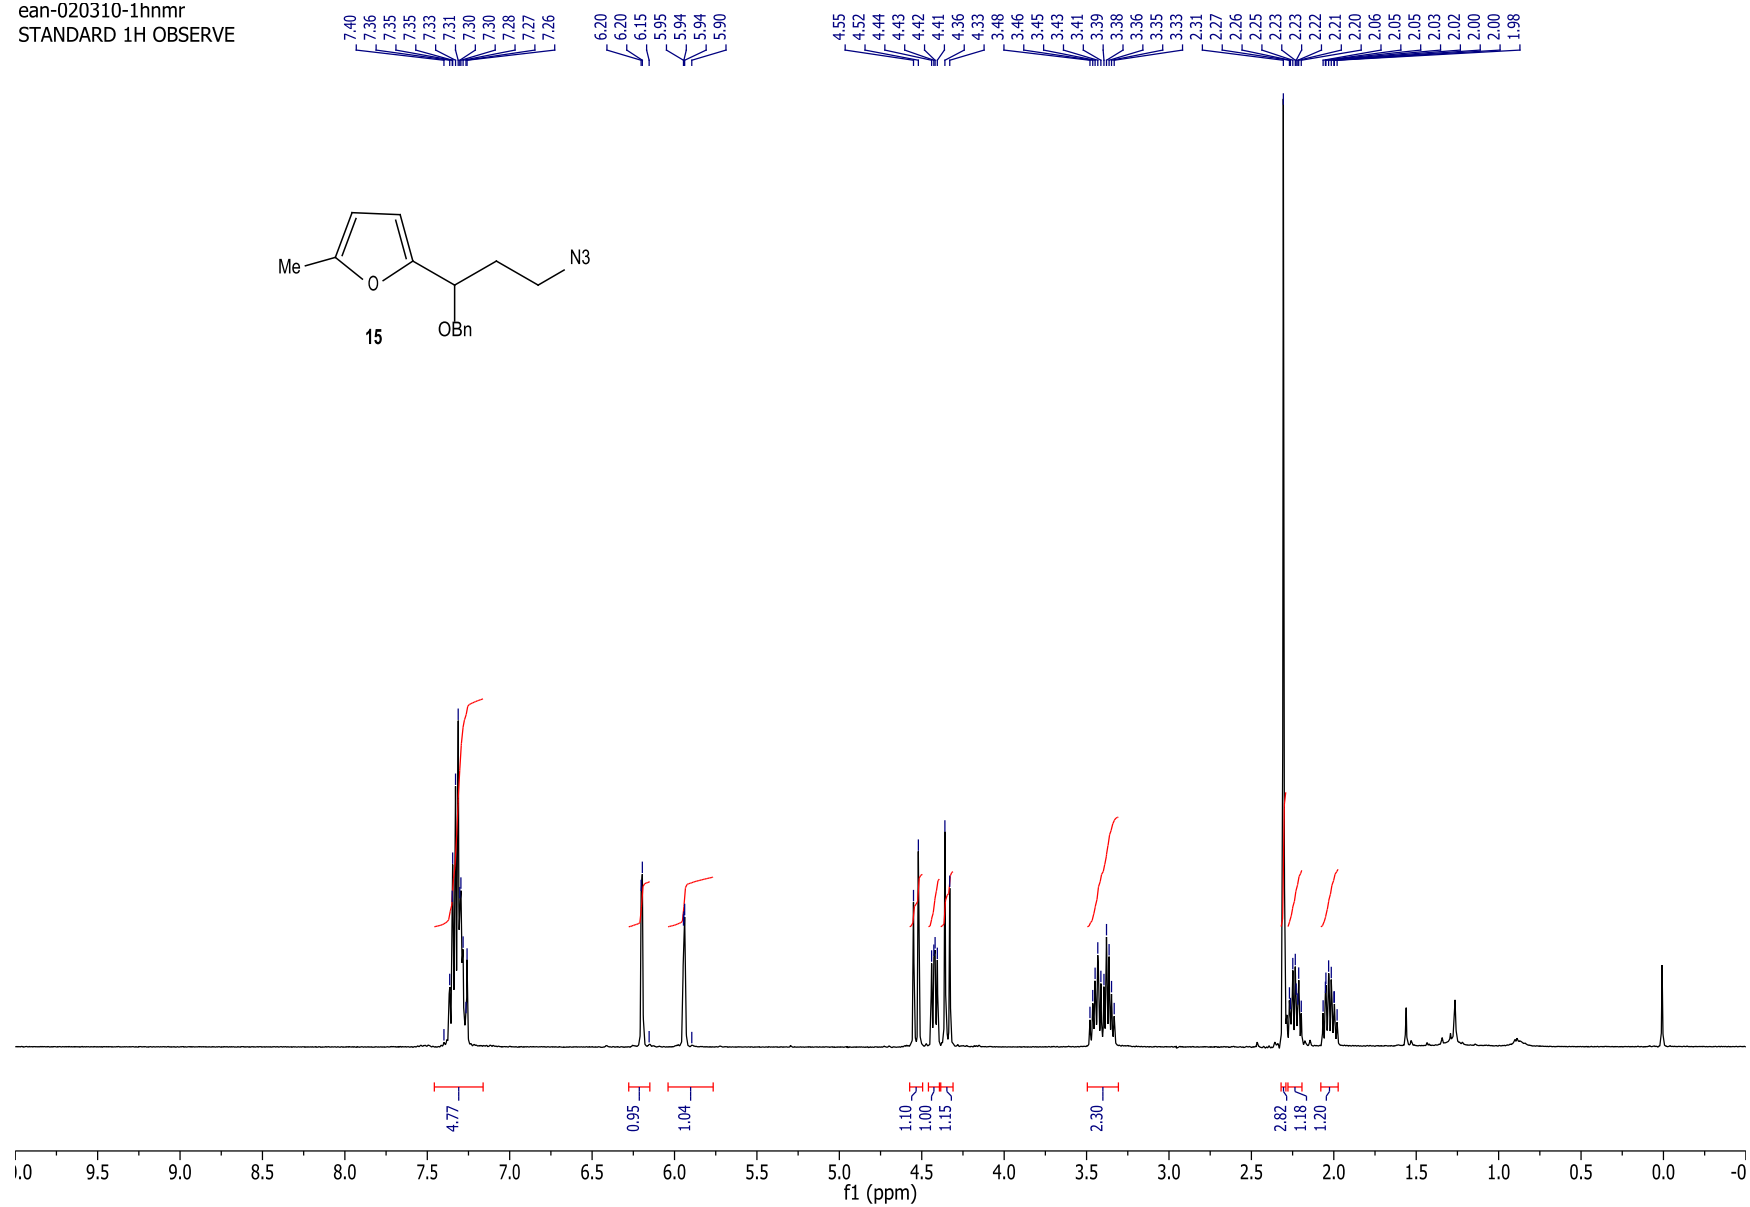



ean-020310-13cnmr  
13C OBSERVE

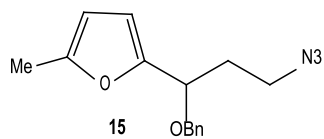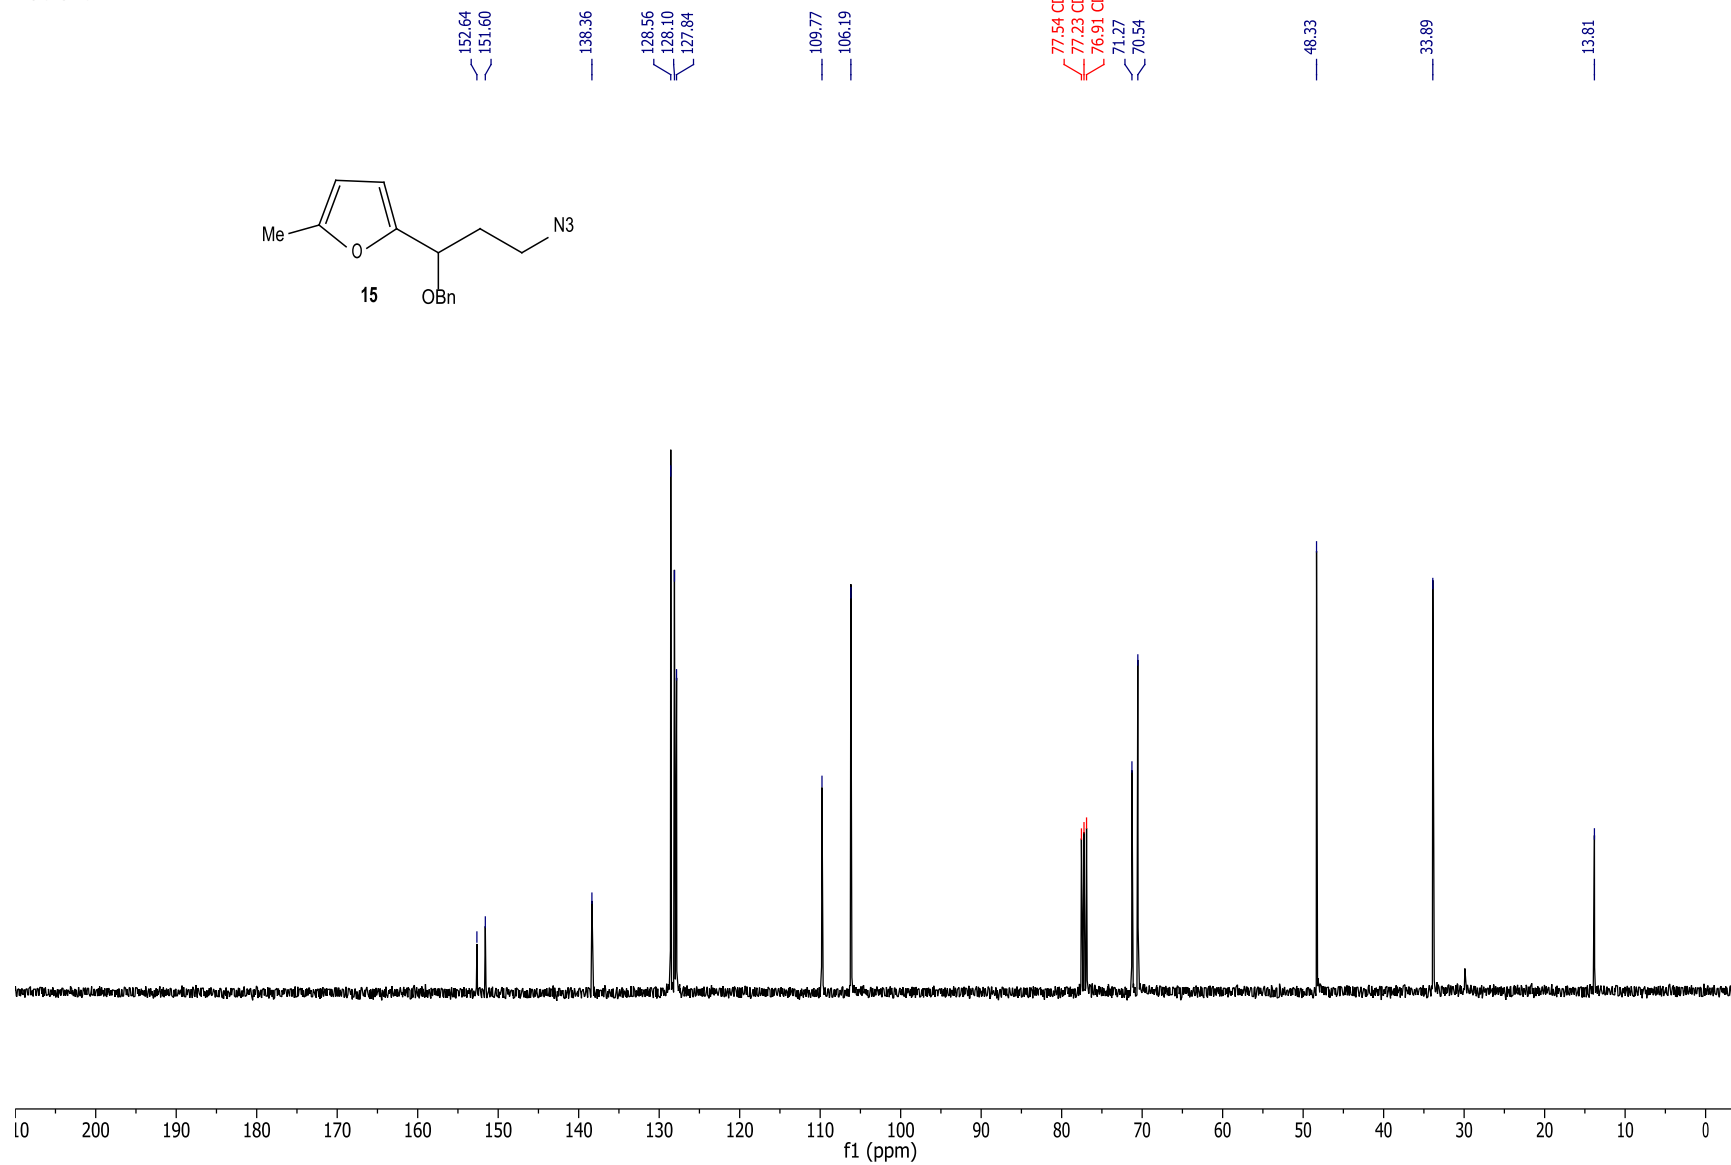

ean-140510-1hnmr  
STANDARD 1H OBSERVE

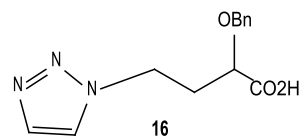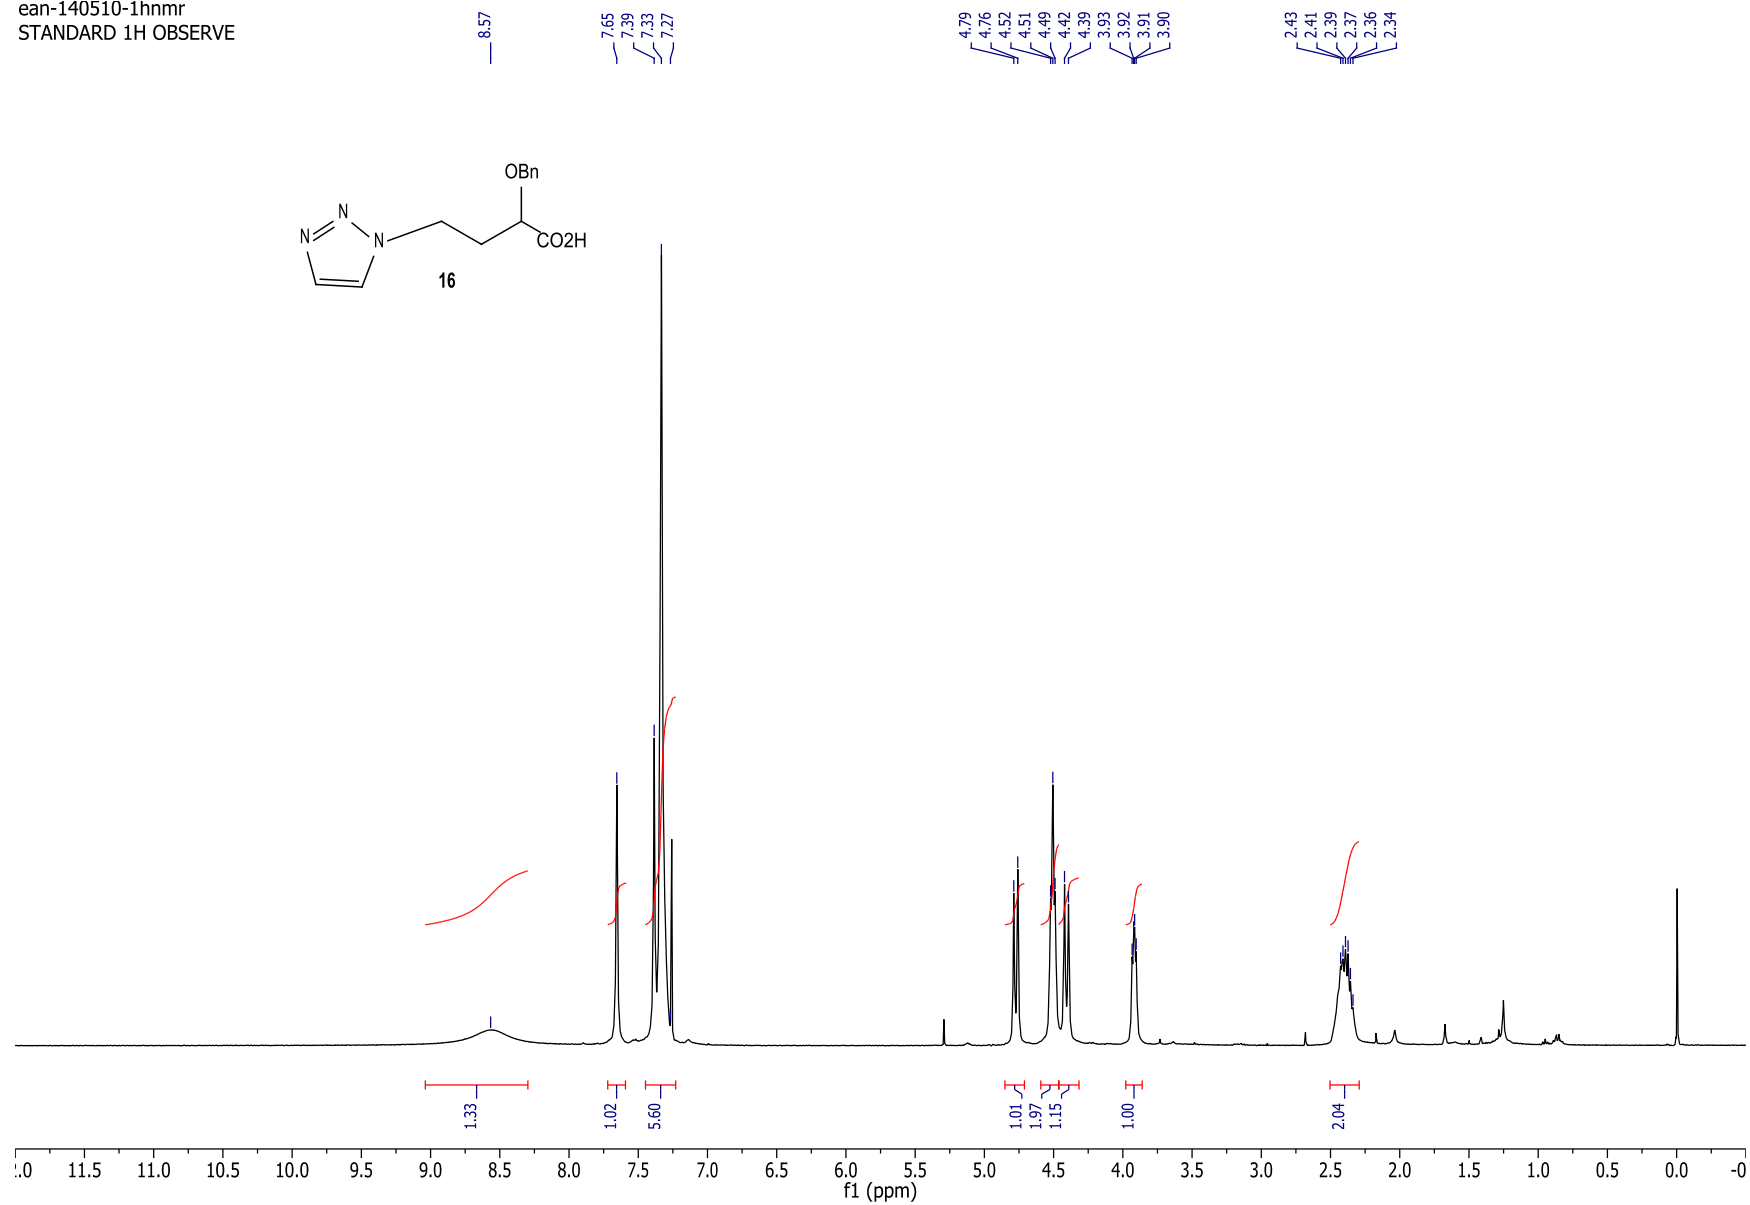

ean-140510-13cnmr  
13C OBSERVE

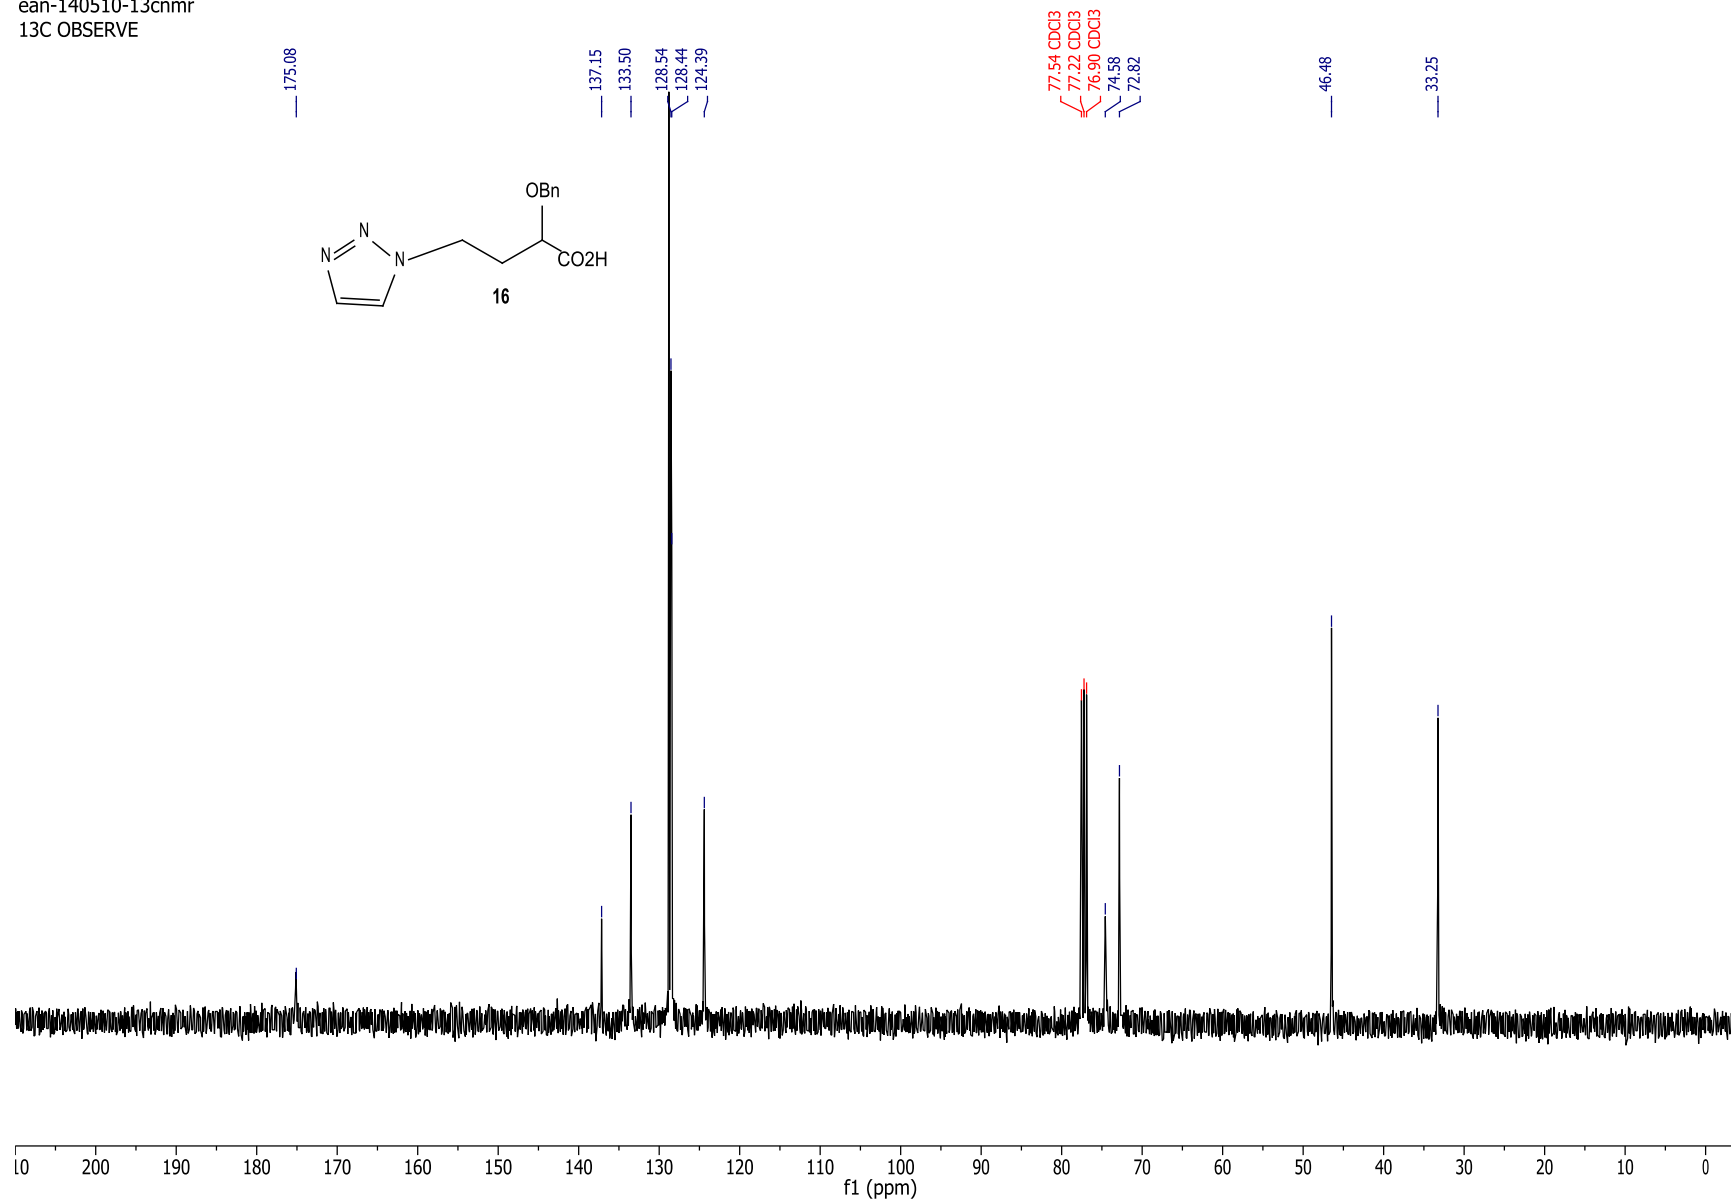

Mustafa  
mku-426-3

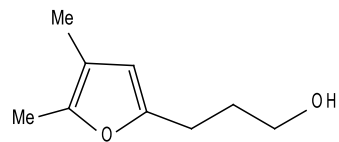

63

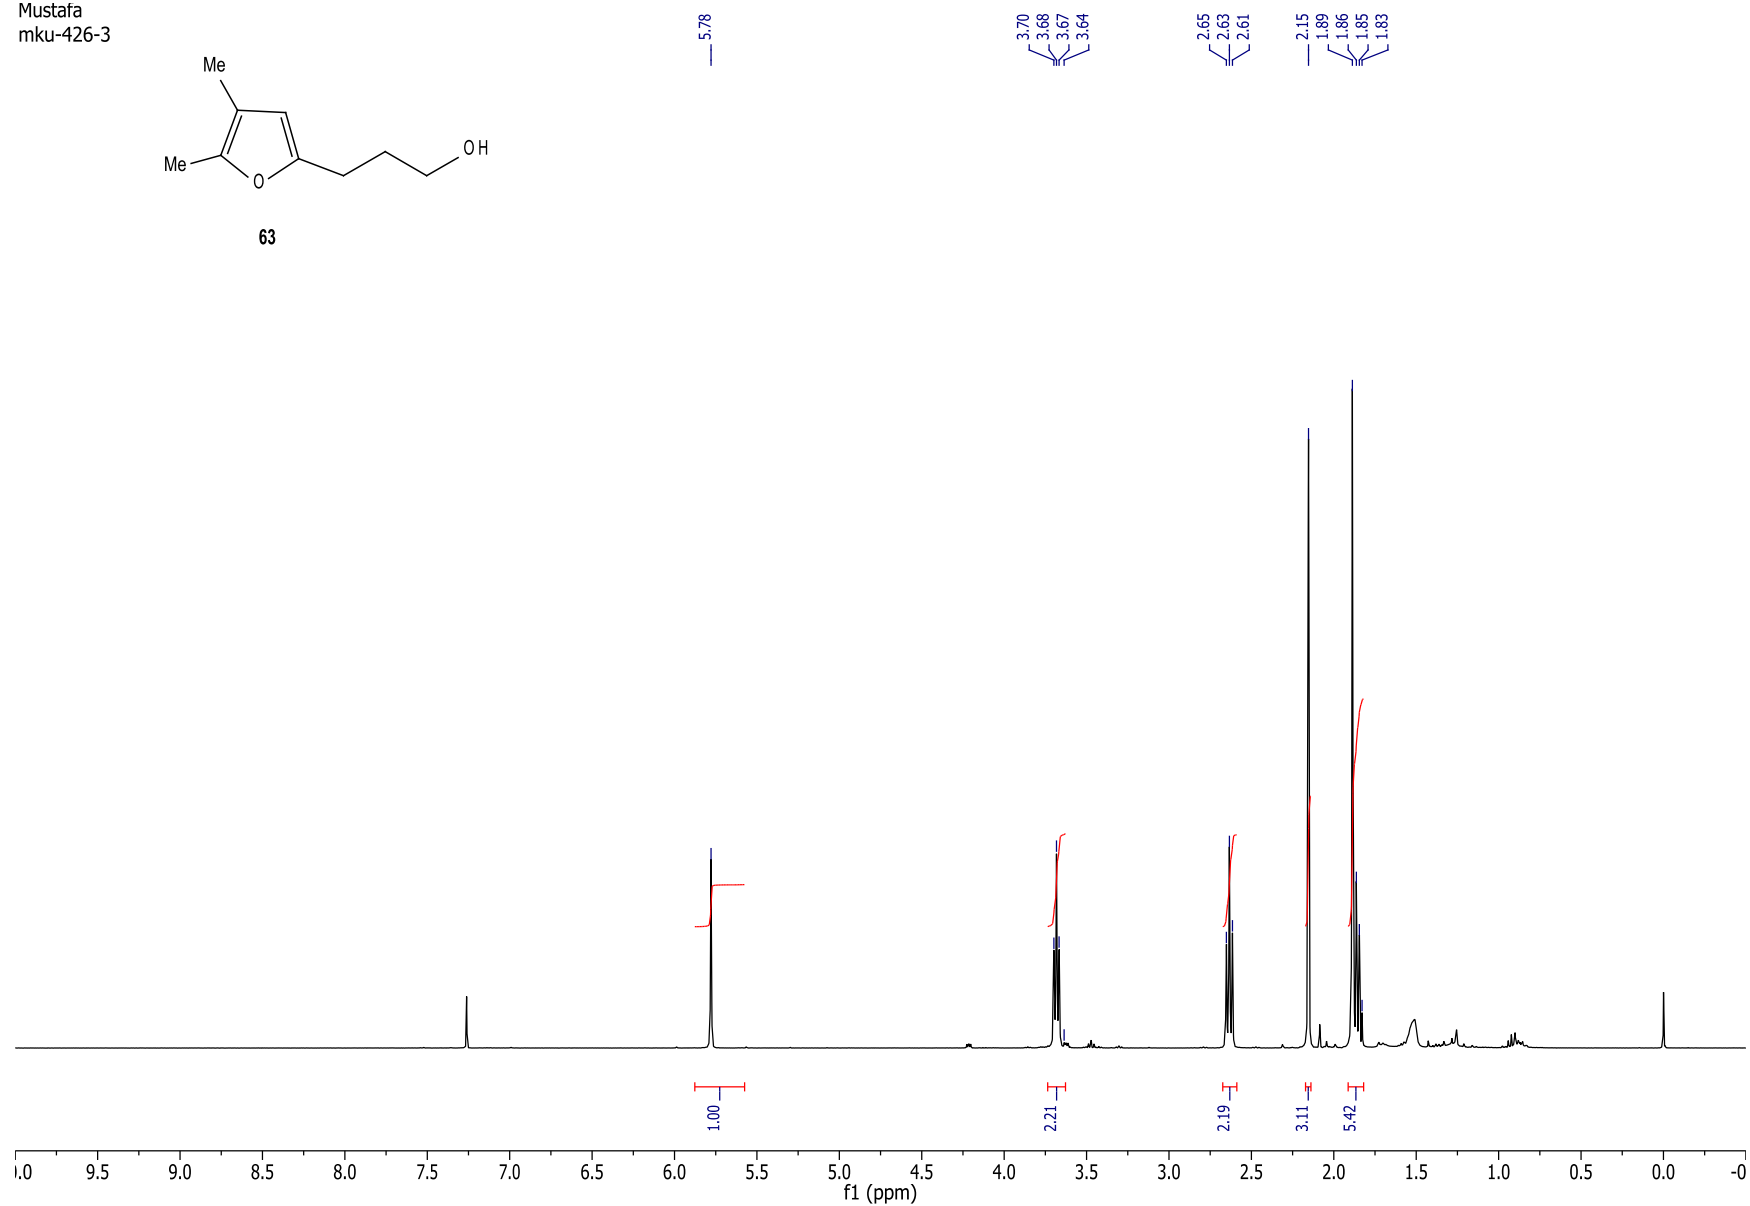

S112

Mustafa  
mku-426-3

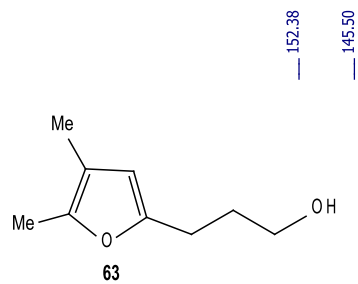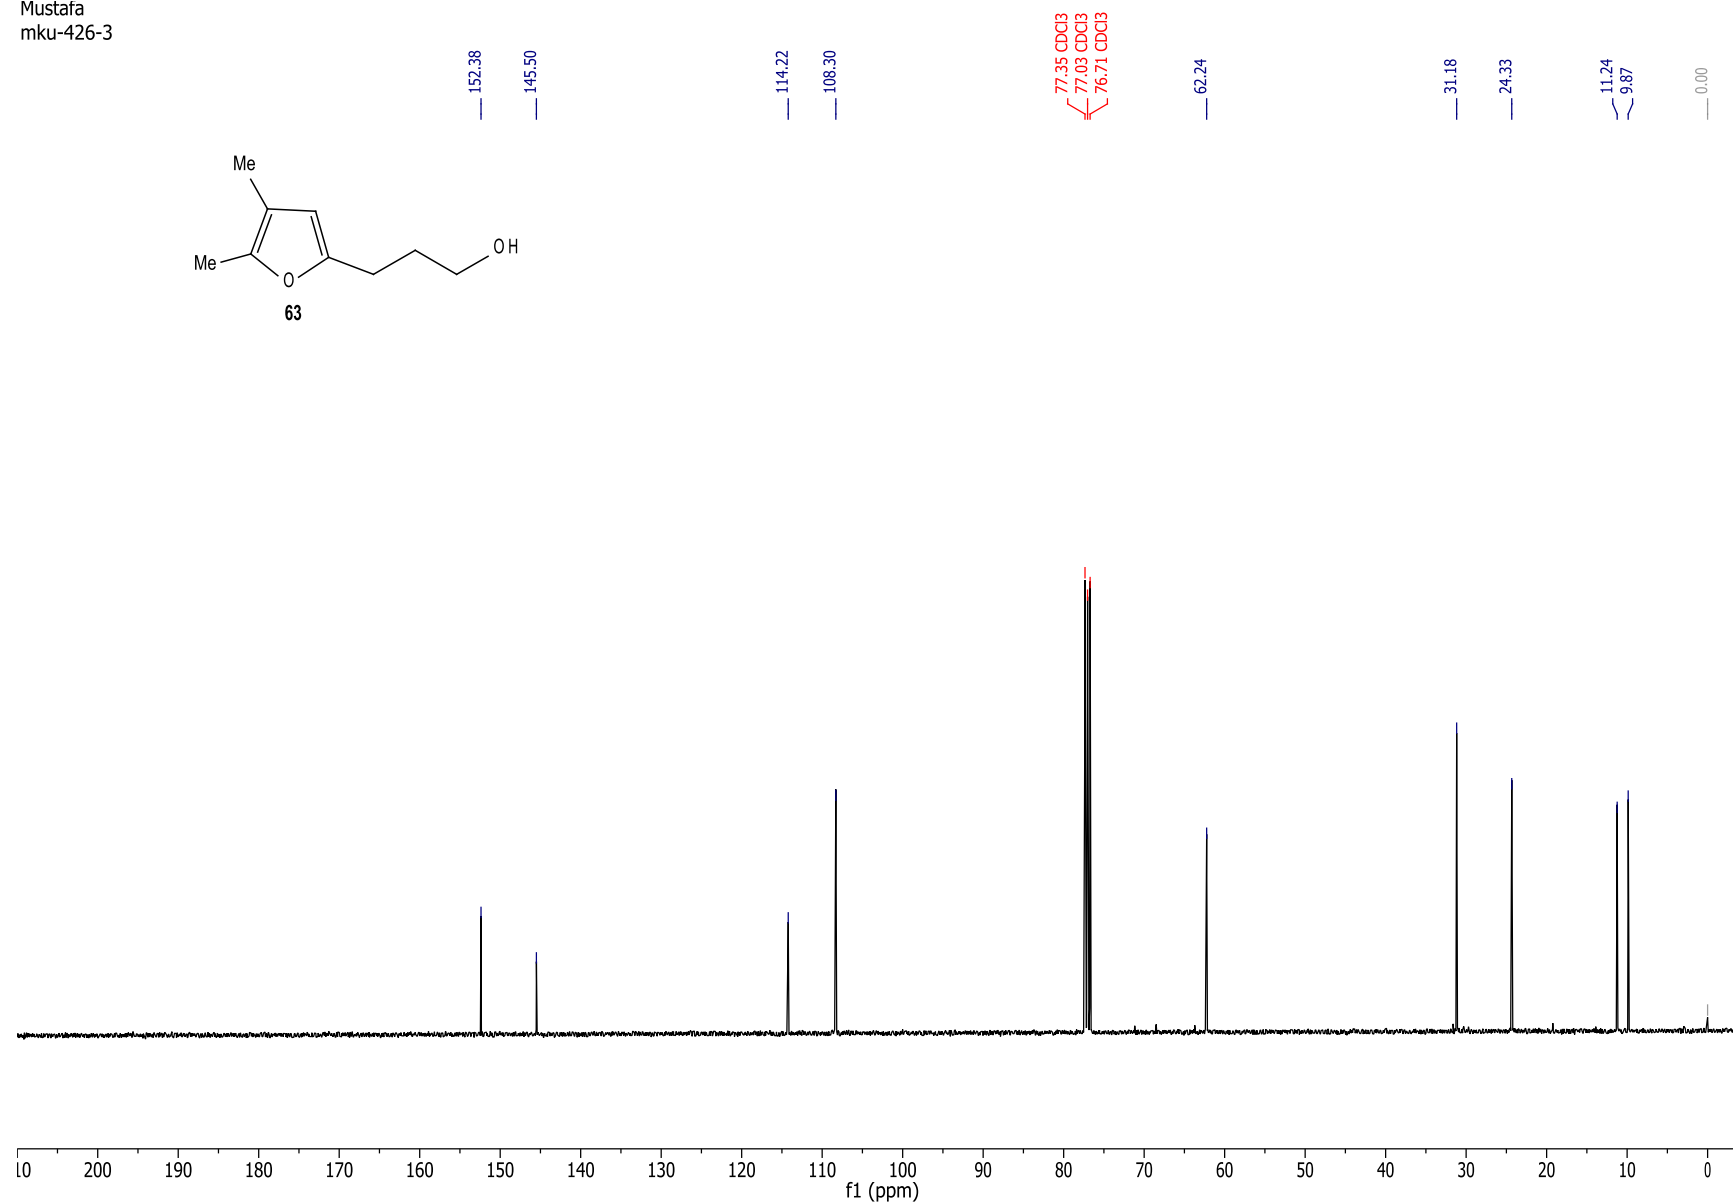

mku-271210-1hnmr  
STANDARD 1H OBSERVE

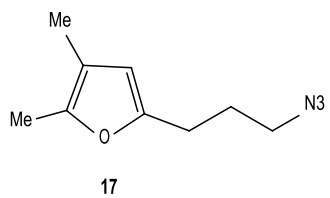

7.26 CDCl<sub>3</sub>

5.84  
5.79  
5.74

3.34  
3.33  
3.31  
3.30

2.65  
2.63  
2.61

2.17  
2.16  
1.91  
1.89  
1.87  
1.85  
1.84  
1.82

0.00

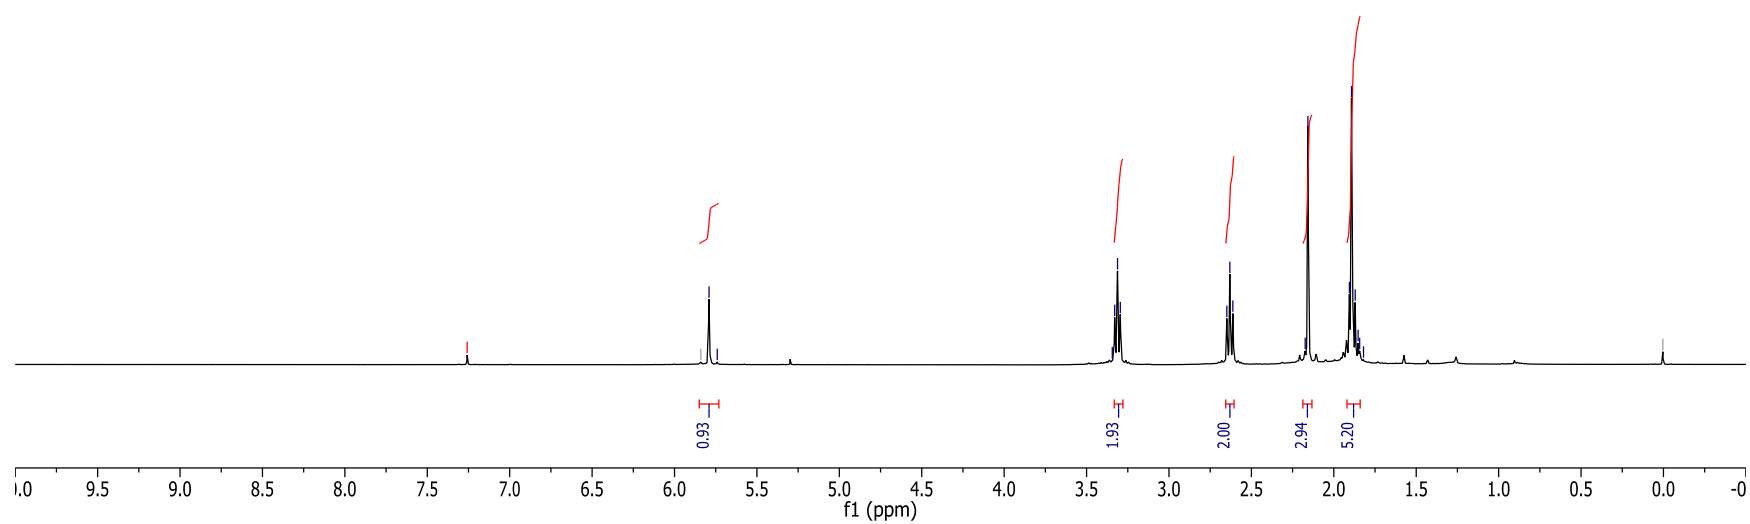

mku-271210-13cnmr  
13C OBSERVE

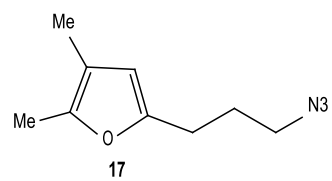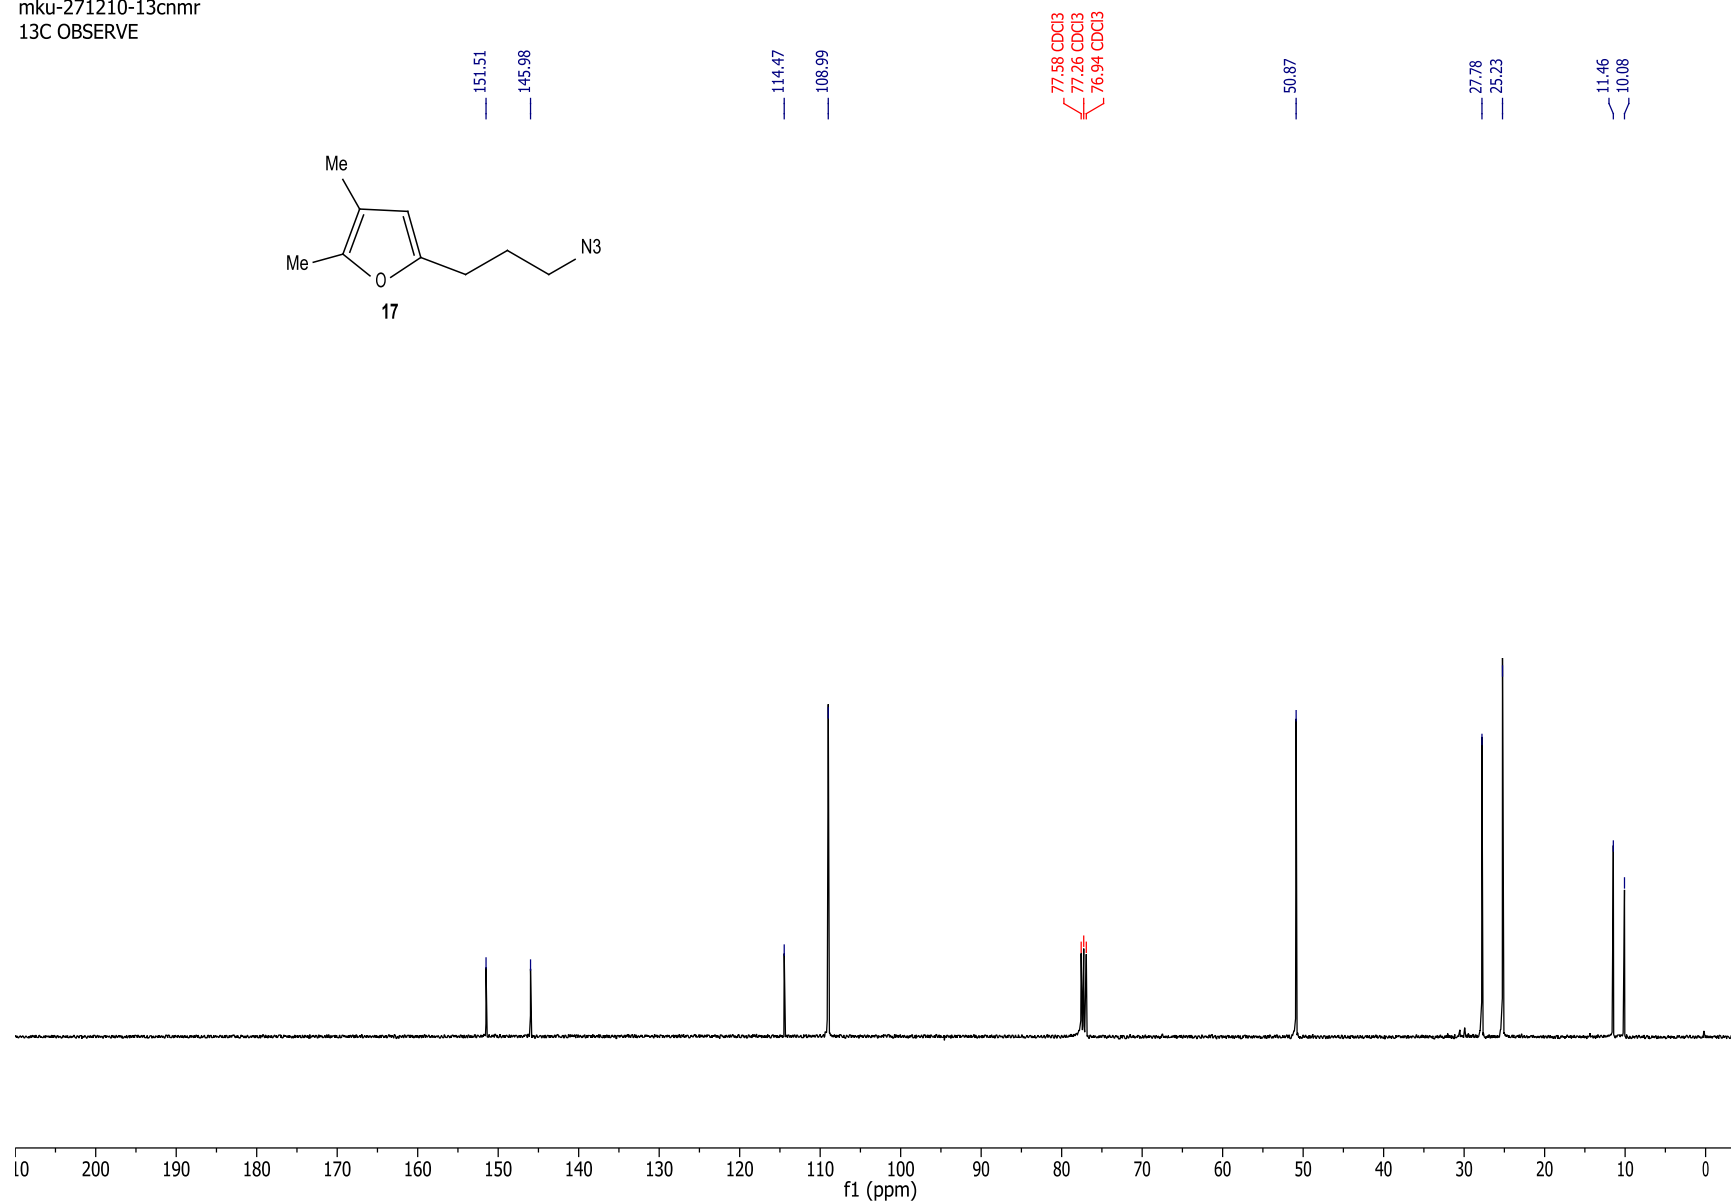

ean-3-290111-1hnmr  
STANDARD 1H OBSERVE

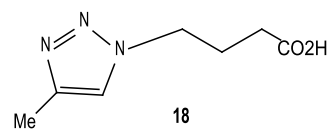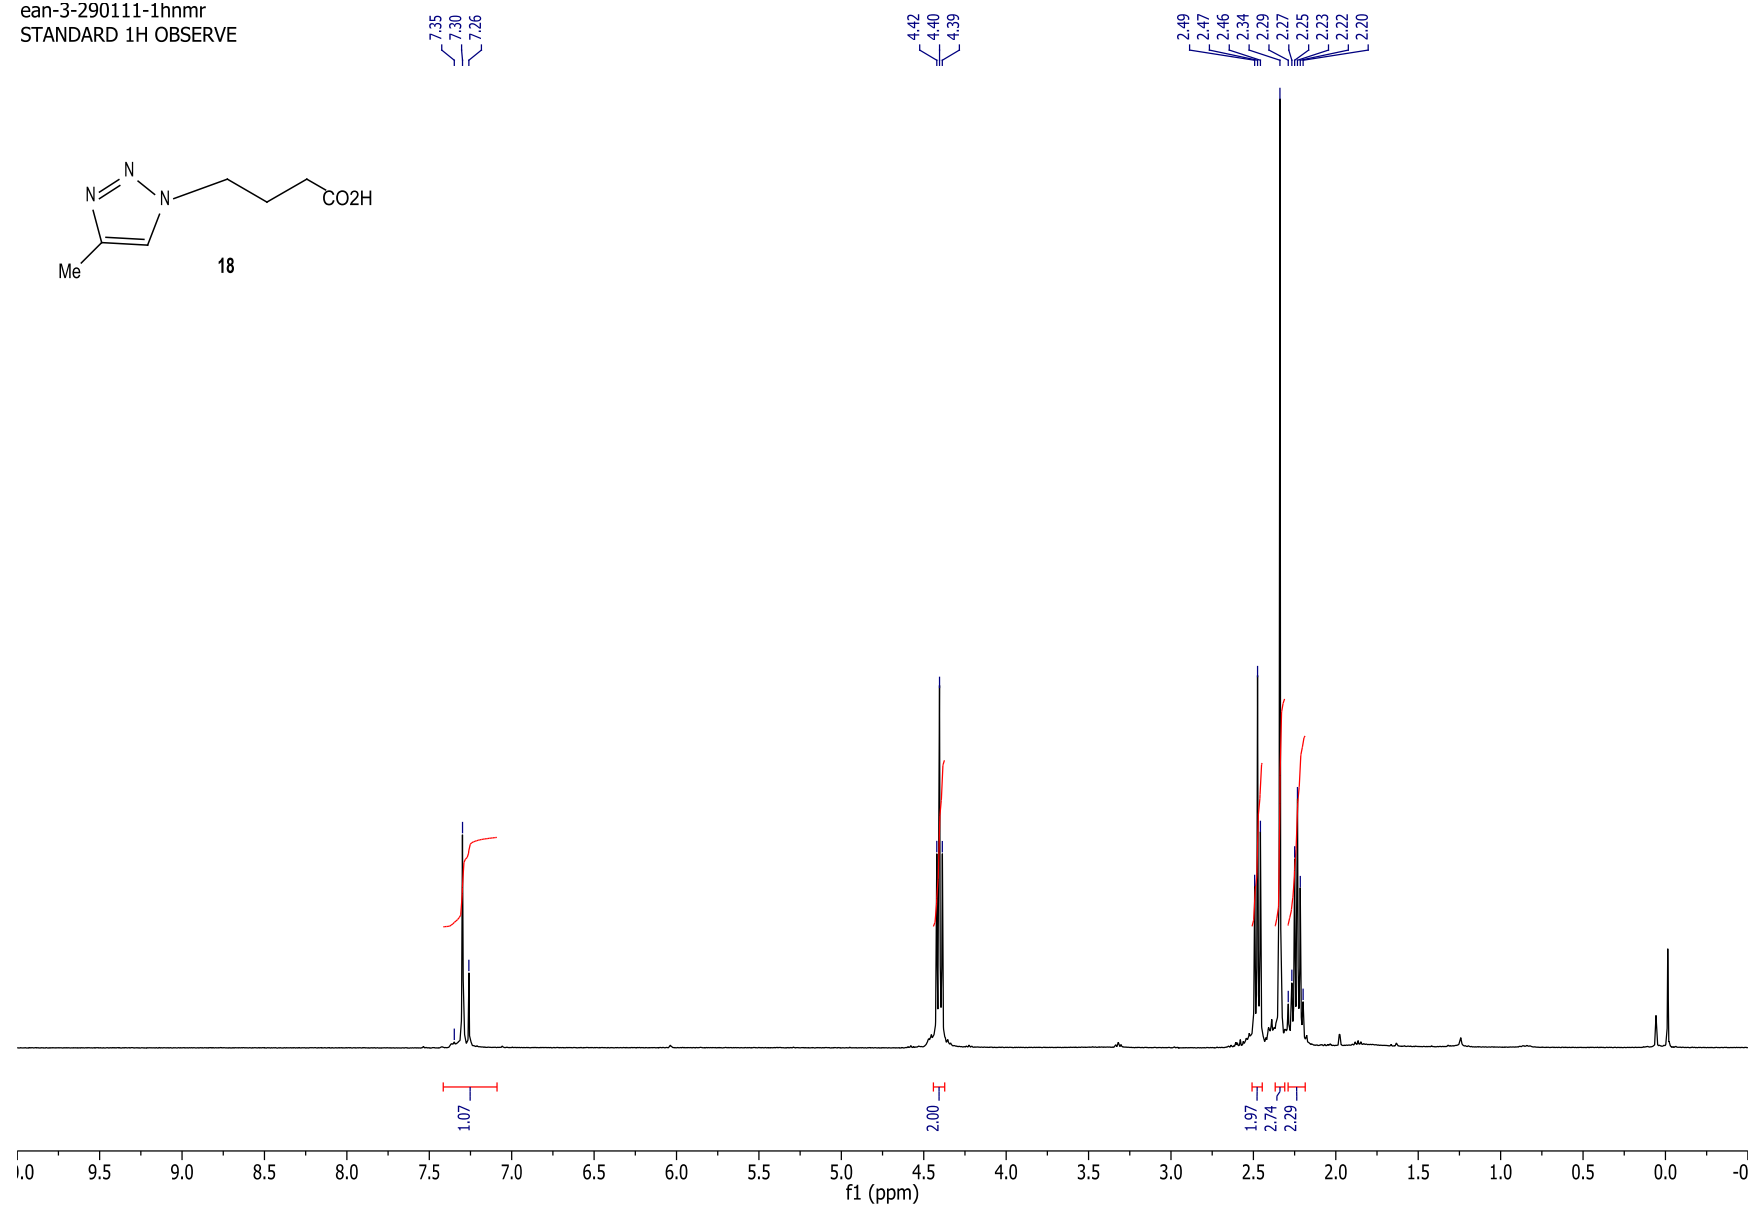



ean-3-290111-13cnmr  
13C OBSERVE

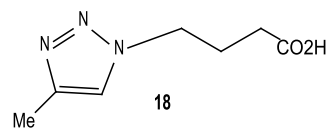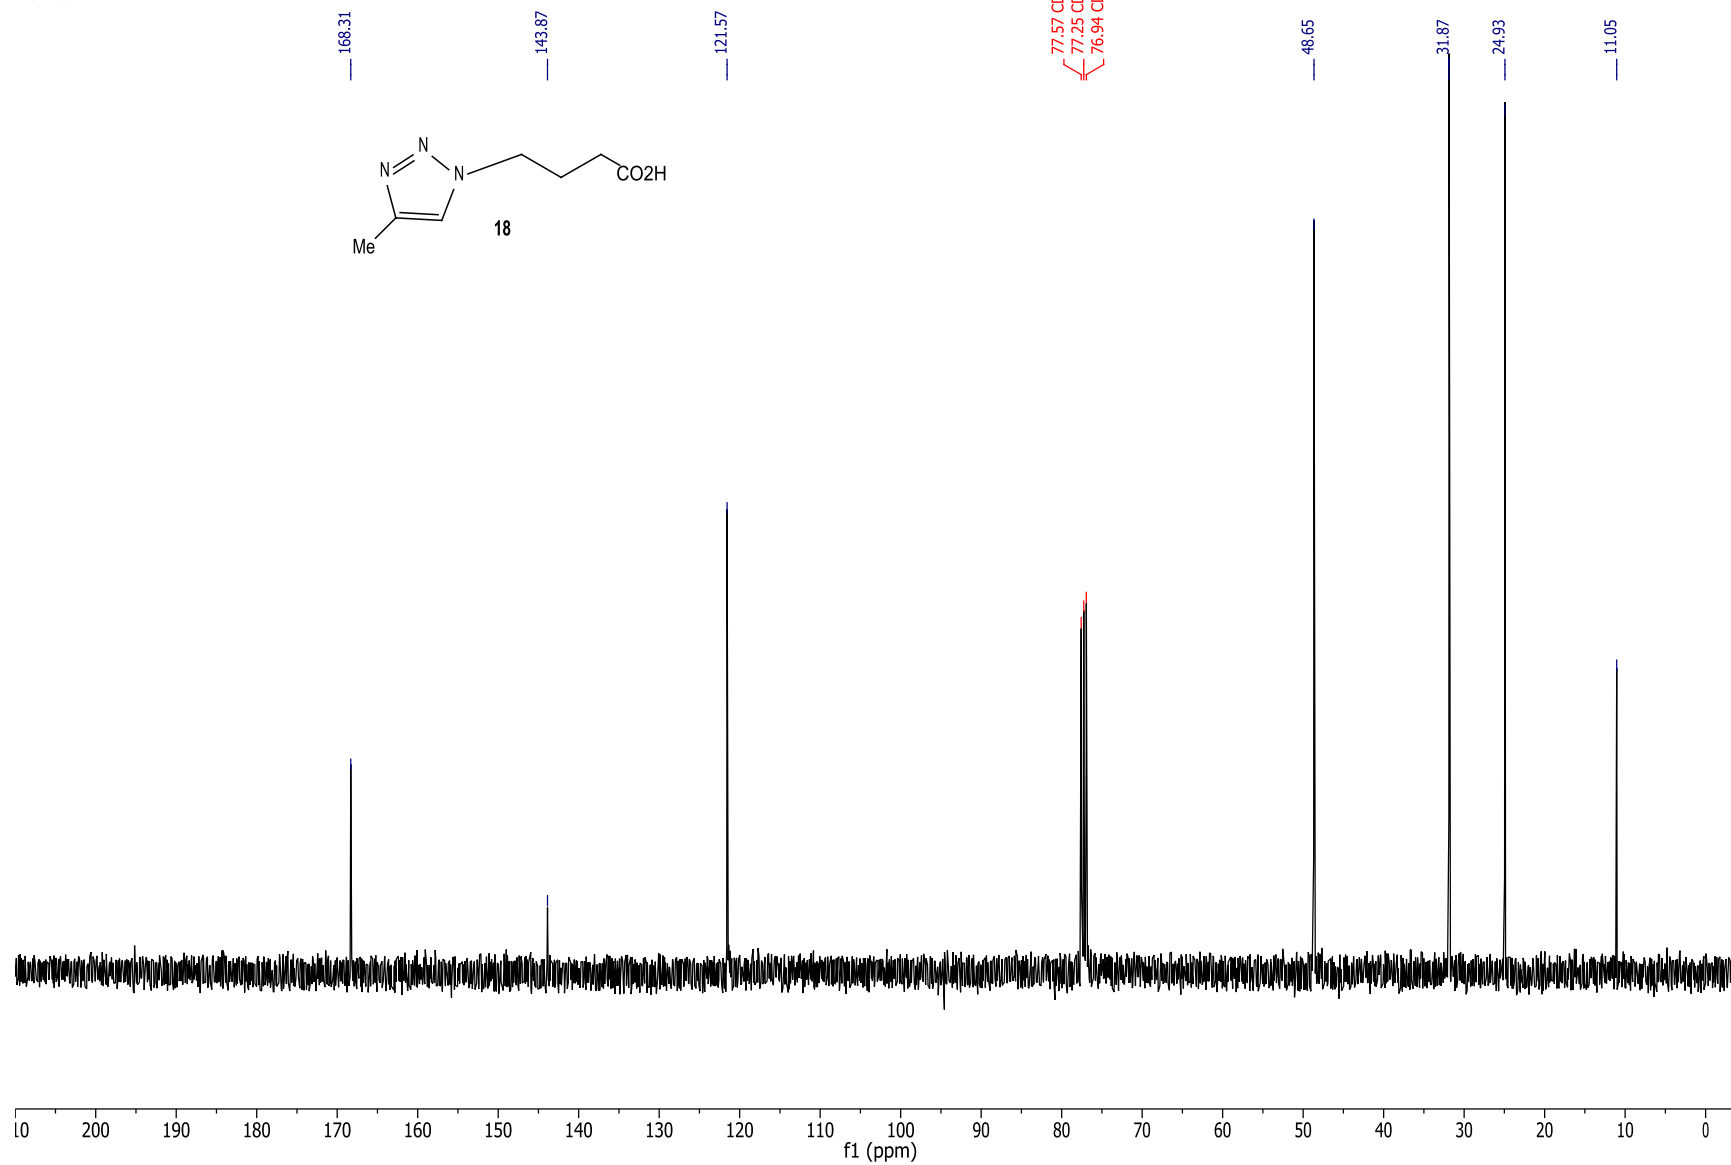

mku-271009-1hnmr  
STANDARD 1H OBSERVE

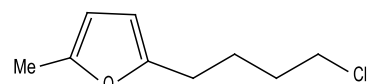

66

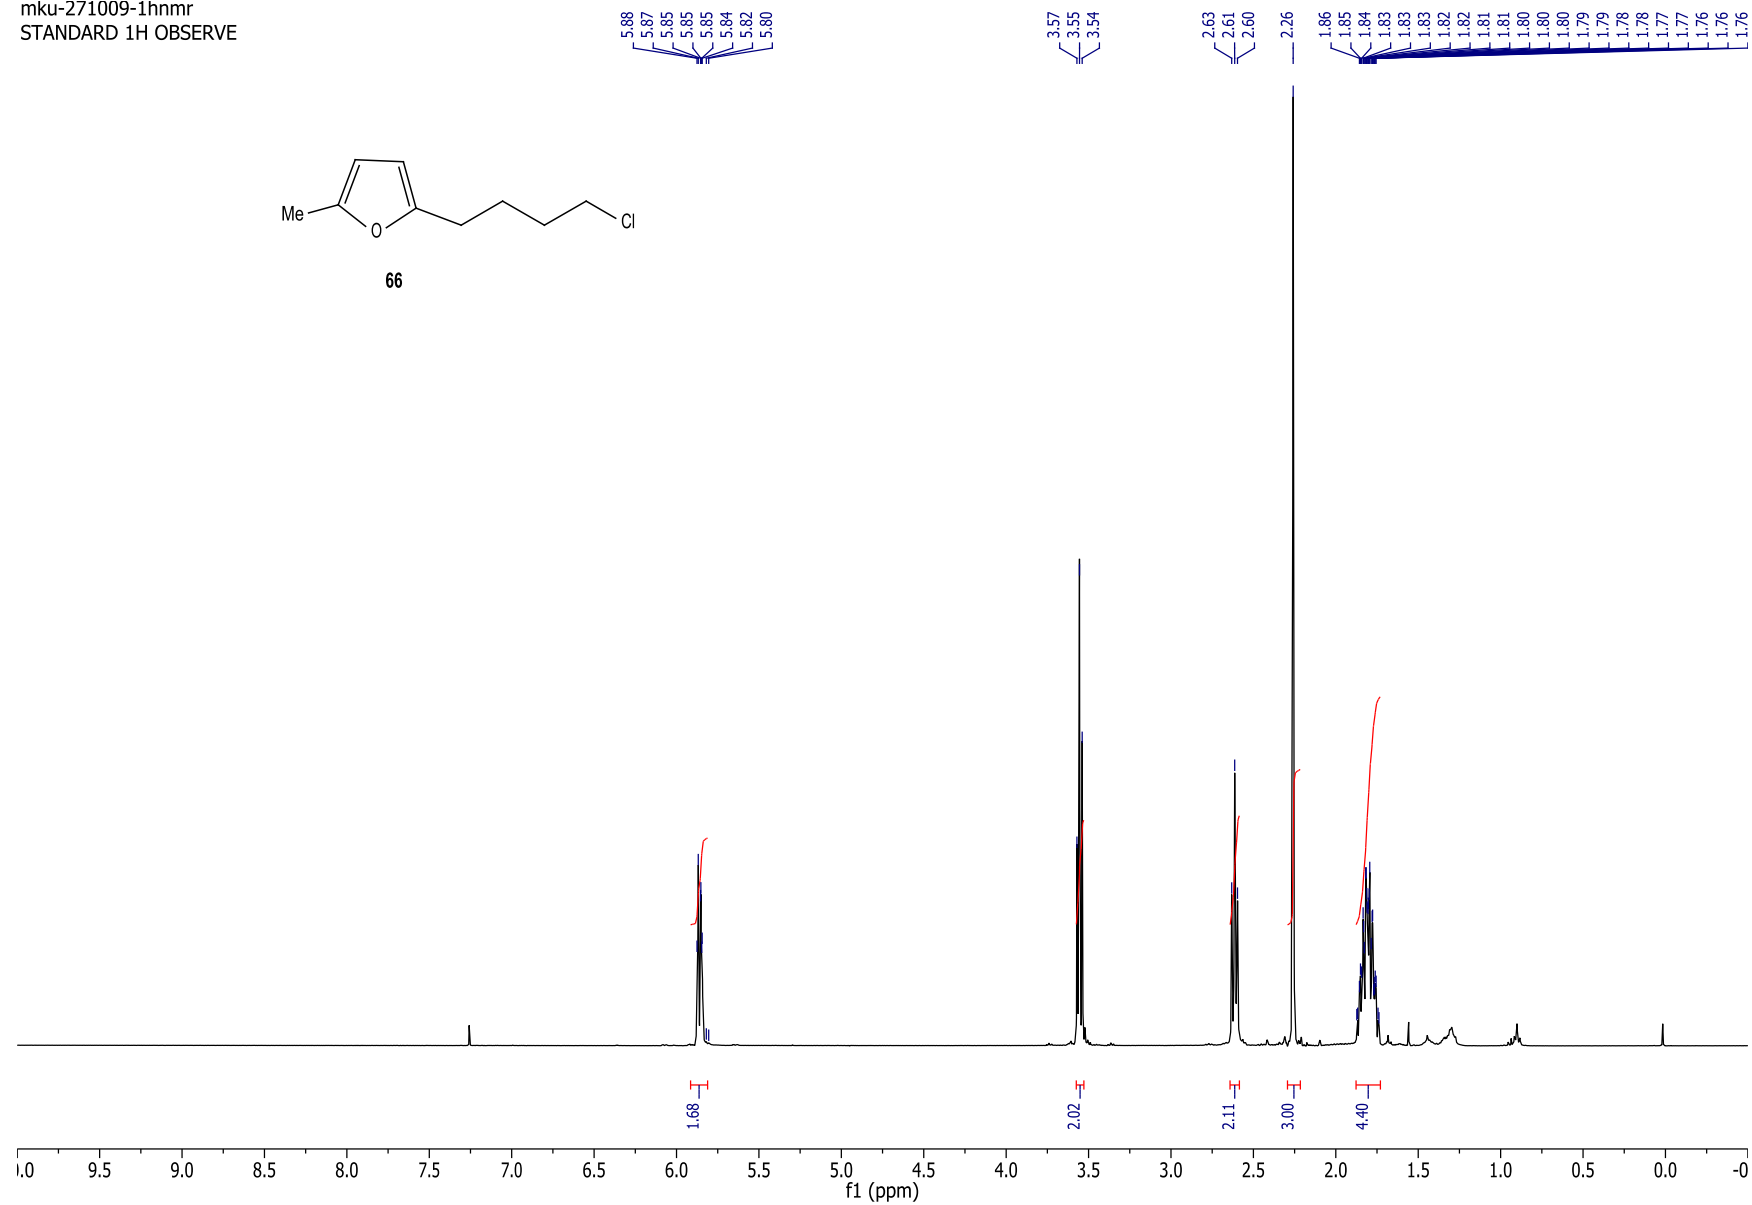

mku-271009-13cnmr  
13C OBSERVE

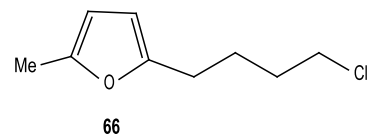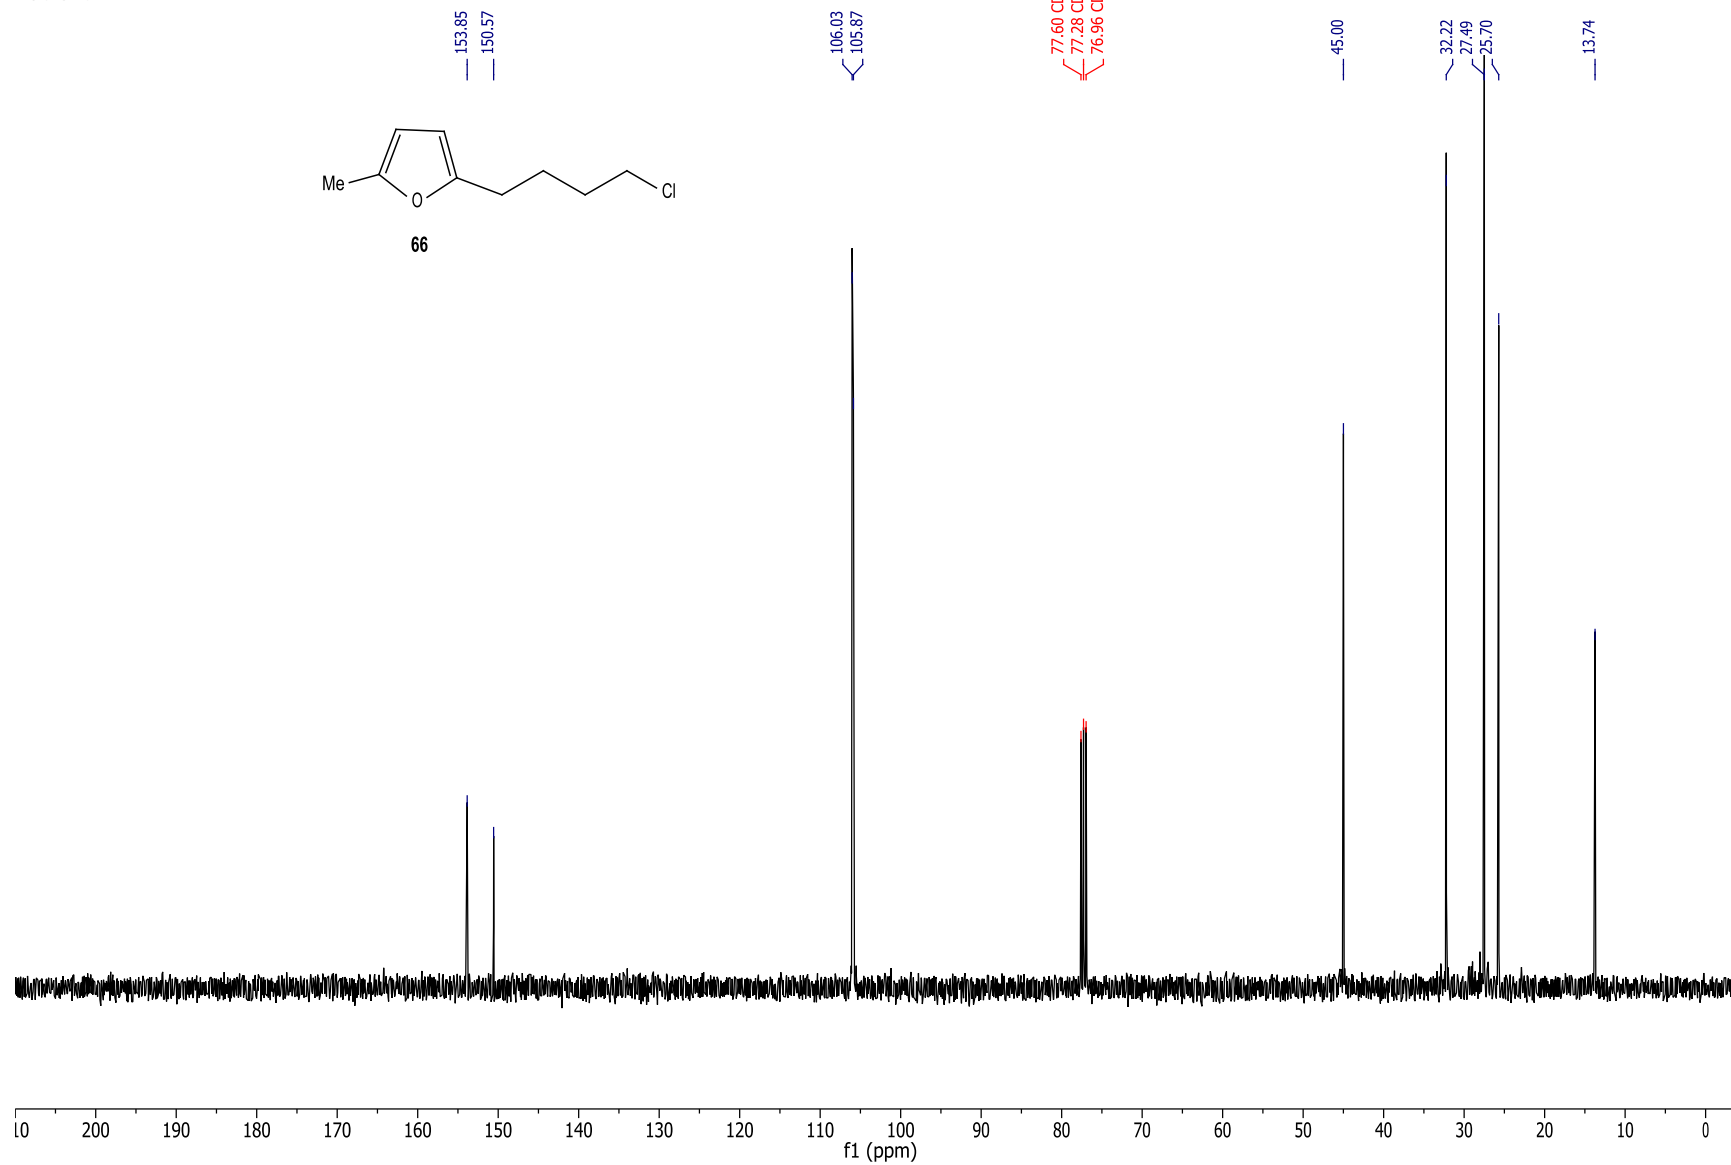

ras-271009-1hnmr  
STANDARD 1H OBSERVE

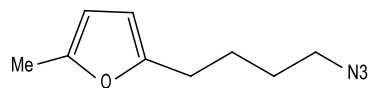

19

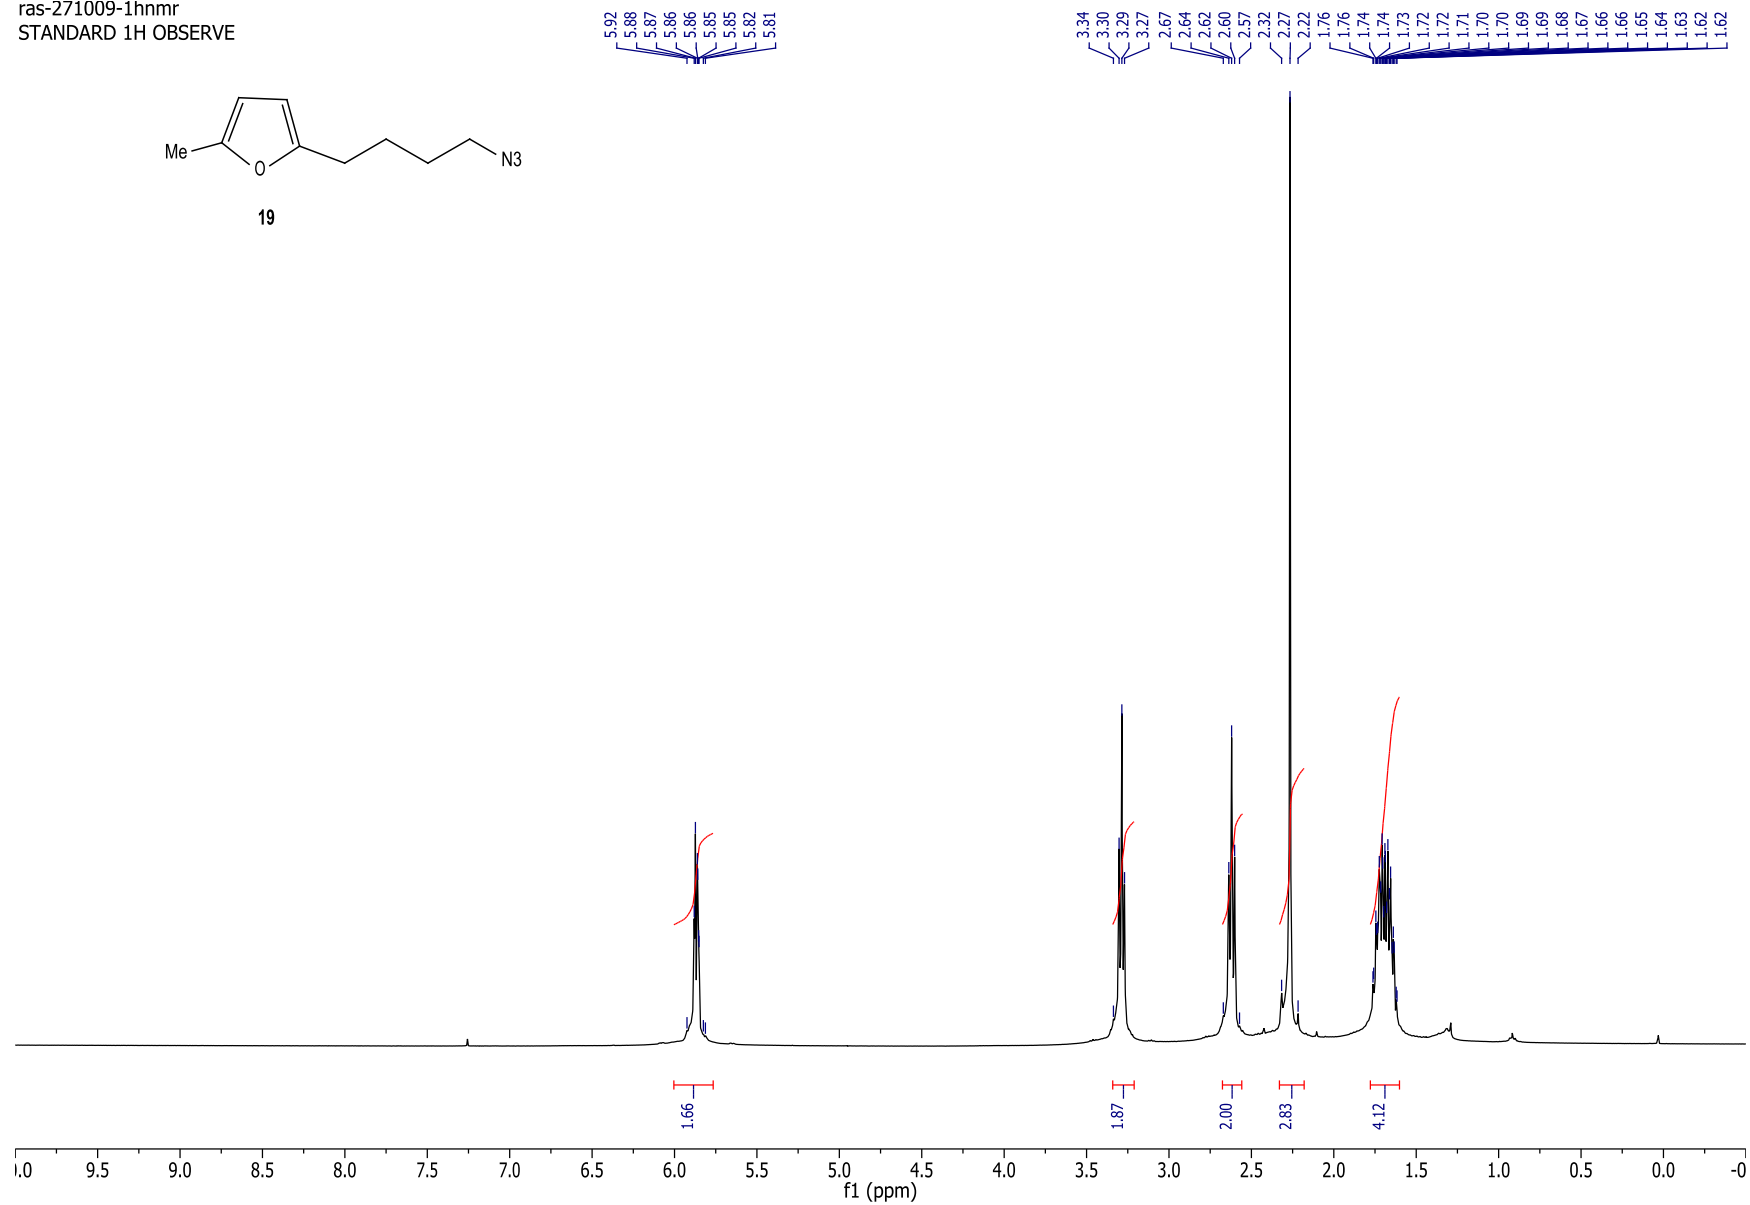

ras-271009-13cnmr  
13C OBSERVE

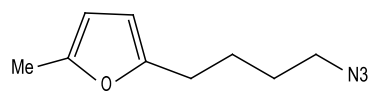

19

153.81  
150.53

106.05  
105.89

77.66 CDCl<sub>3</sub>  
77.34 CDCl<sub>3</sub>  
77.02 CDCl<sub>3</sub>

51.42

28.53  
27.73  
25.57

13.64

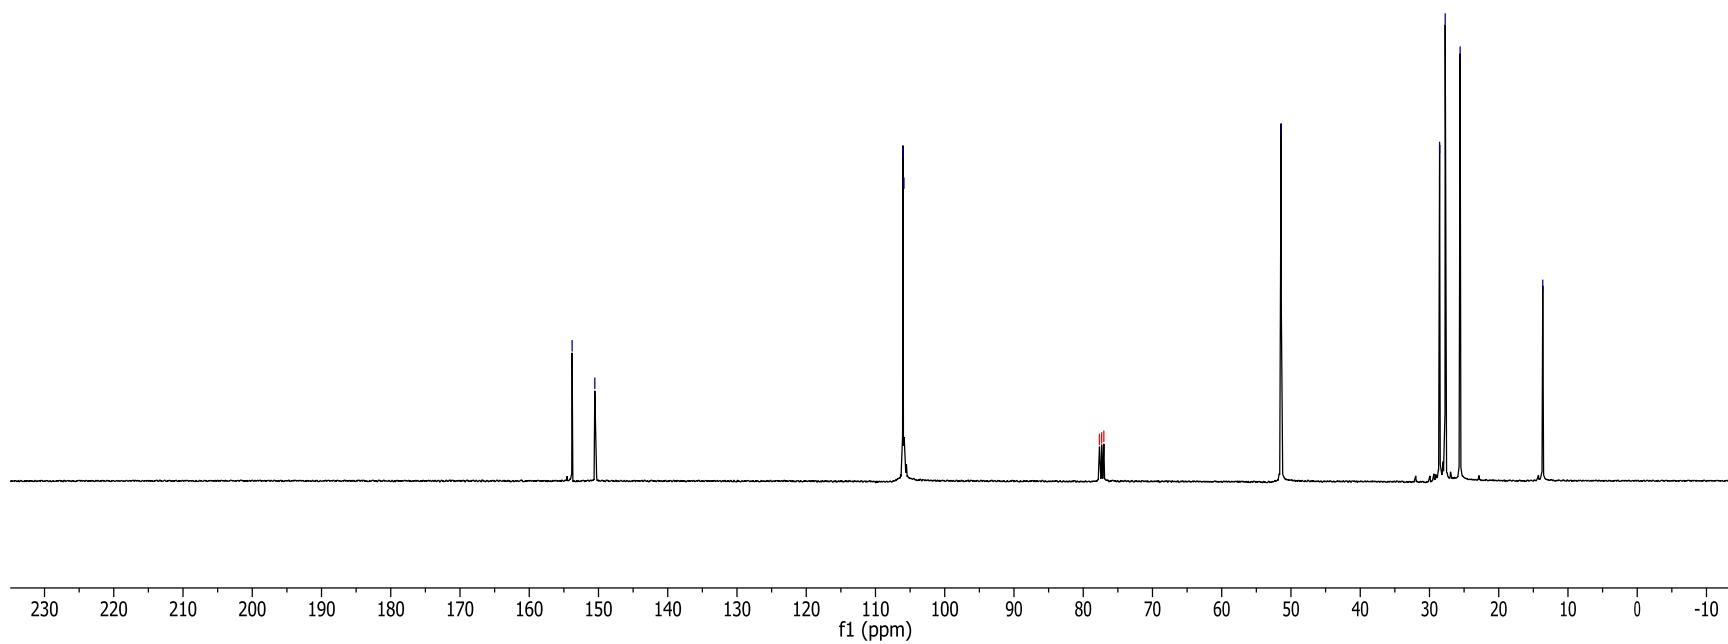

S121

| INDEX | FREQUENCY | PPM   | HEIGHT |
|-------|-----------|-------|--------|
| 1     | 3087.593  | 7.724 | 26.0   |
| 2     | 3086.860  | 7.722 | 29.9   |
| 3     | 3026.371  | 7.570 | 26.8   |
| 4     | 3025.271  | 7.568 | 31.5   |
| 5     | 2901.727  | 7.259 | 31.1   |
| 6     | 1774.066  | 4.438 | 19.2   |
| 7     | 1767.100  | 4.420 | 35.8   |
| 8     | 1759.768  | 4.402 | 19.1   |
| 9     | 969.379   | 2.425 | 19.3   |
| 10    | 962.413   | 2.407 | 39.1   |
| 11    | 955.081   | 2.389 | 20.7   |
| 12    | 813.941   | 2.036 | 4.9    |
| 13    | 806.609   | 2.018 | 12.1   |
| 14    | 803.676   | 2.010 | 6.4    |
| 15    | 801.476   | 2.005 | 9.5    |
| 16    | 799.277   | 1.999 | 14.7   |
| 17    | 796.344   | 1.992 | 9.7    |
| 18    | 794.144   | 1.987 | 6.7    |
| 19    | 791.211   | 1.979 | 12.1   |
| 20    | 784.246   | 1.962 | 5.6    |
| 21    | 679.032   | 1.699 | 5.8    |
| 22    | 672.066   | 1.681 | 13.3   |
| 23    | 666.934   | 1.668 | 9.2    |
| 24    | 664.001   | 1.661 | 15.0   |
| 25    | 662.168   | 1.656 | 10.8   |
| 26    | 656.303   | 1.642 | 12.2   |
| 27    | 512.962   | 1.283 | 5.3    |
| 28    | 509.663   | 1.275 | 6.2    |
| 29    | 497.565   | 1.245 | 21.3   |

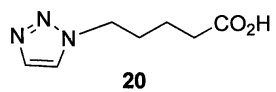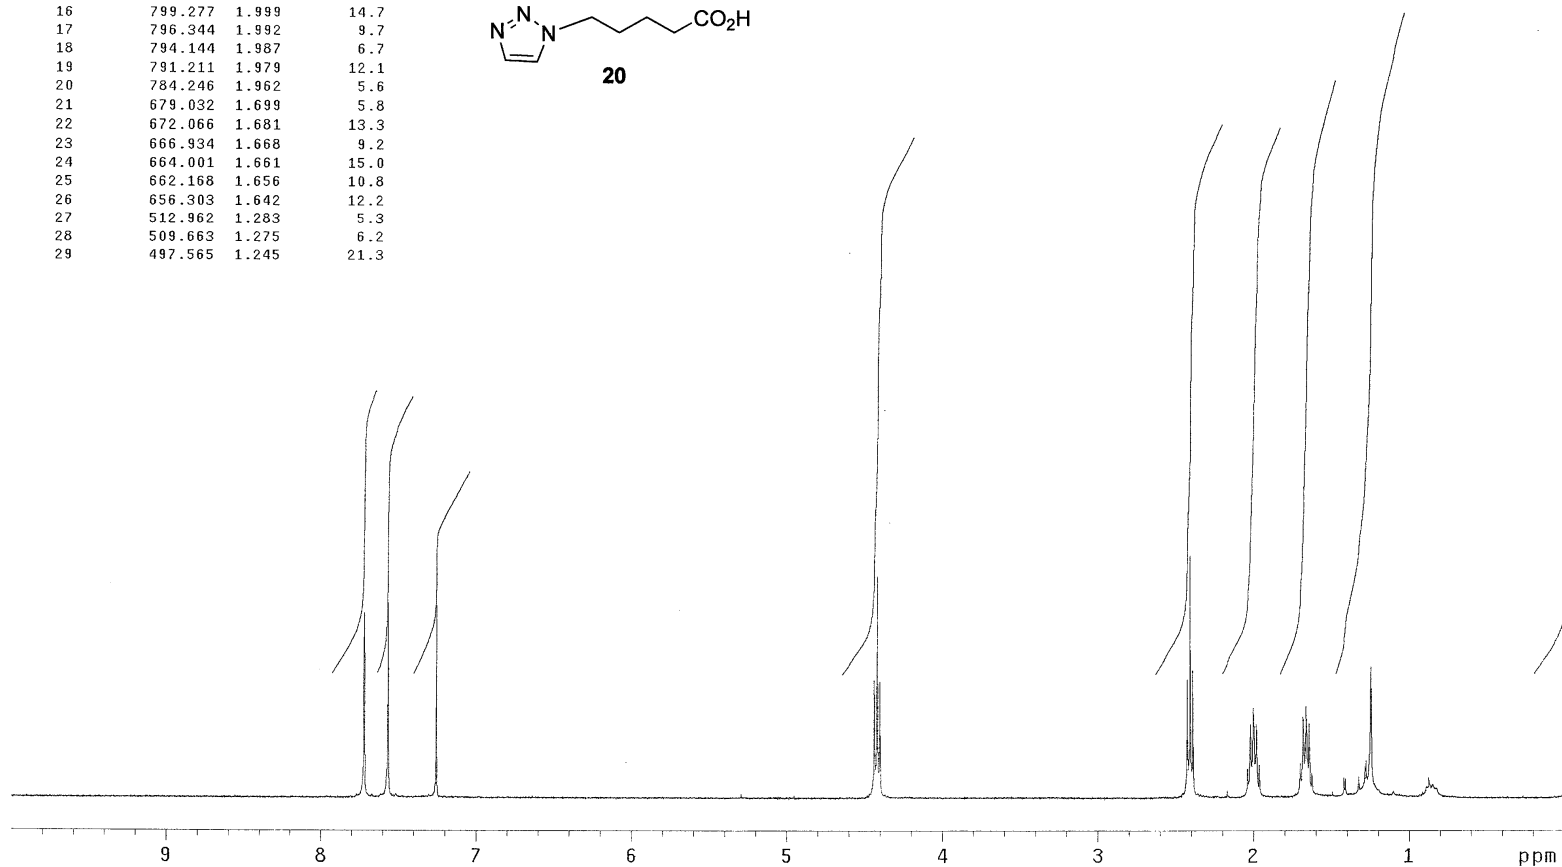

MLD-210-AP

210

MLU

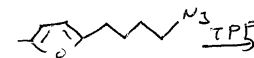

| INDEX | FREQUENCY | PPM     | HEIGHT |
|-------|-----------|---------|--------|
| 1     | 17865.581 | 177.731 | 5.1    |
| 2     | 13466.338 | 133.967 | 19.3   |
| 3     | 12416.501 | 123.522 | 15.3   |
| 4     | 7794.473  | 77.541  | 33.3   |
| 5     | 7762.428  | 77.223  | 33.4   |
| 6     | 7730.384  | 76.904  | 31.9   |
| 7     | 5027.207  | 50.012  | 25.4   |
| 8     | 3339.533  | 33.223  | 32.8   |
| 9     | 3005.356  | 29.898  | 9.0    |
| 10    | 2988.570  | 29.731  | 28.0   |
| 11    | 2187.460  | 21.761  | 32.1   |

MK-210

ME-210

S-8

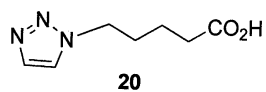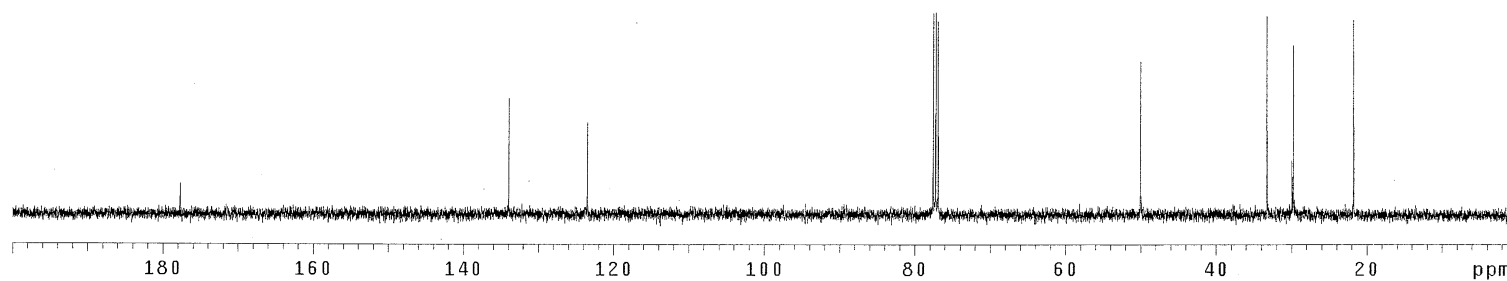

mku-270511-1hnmr  
STANDARD 1H OBSERVE

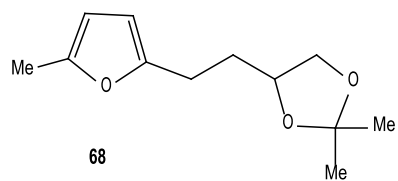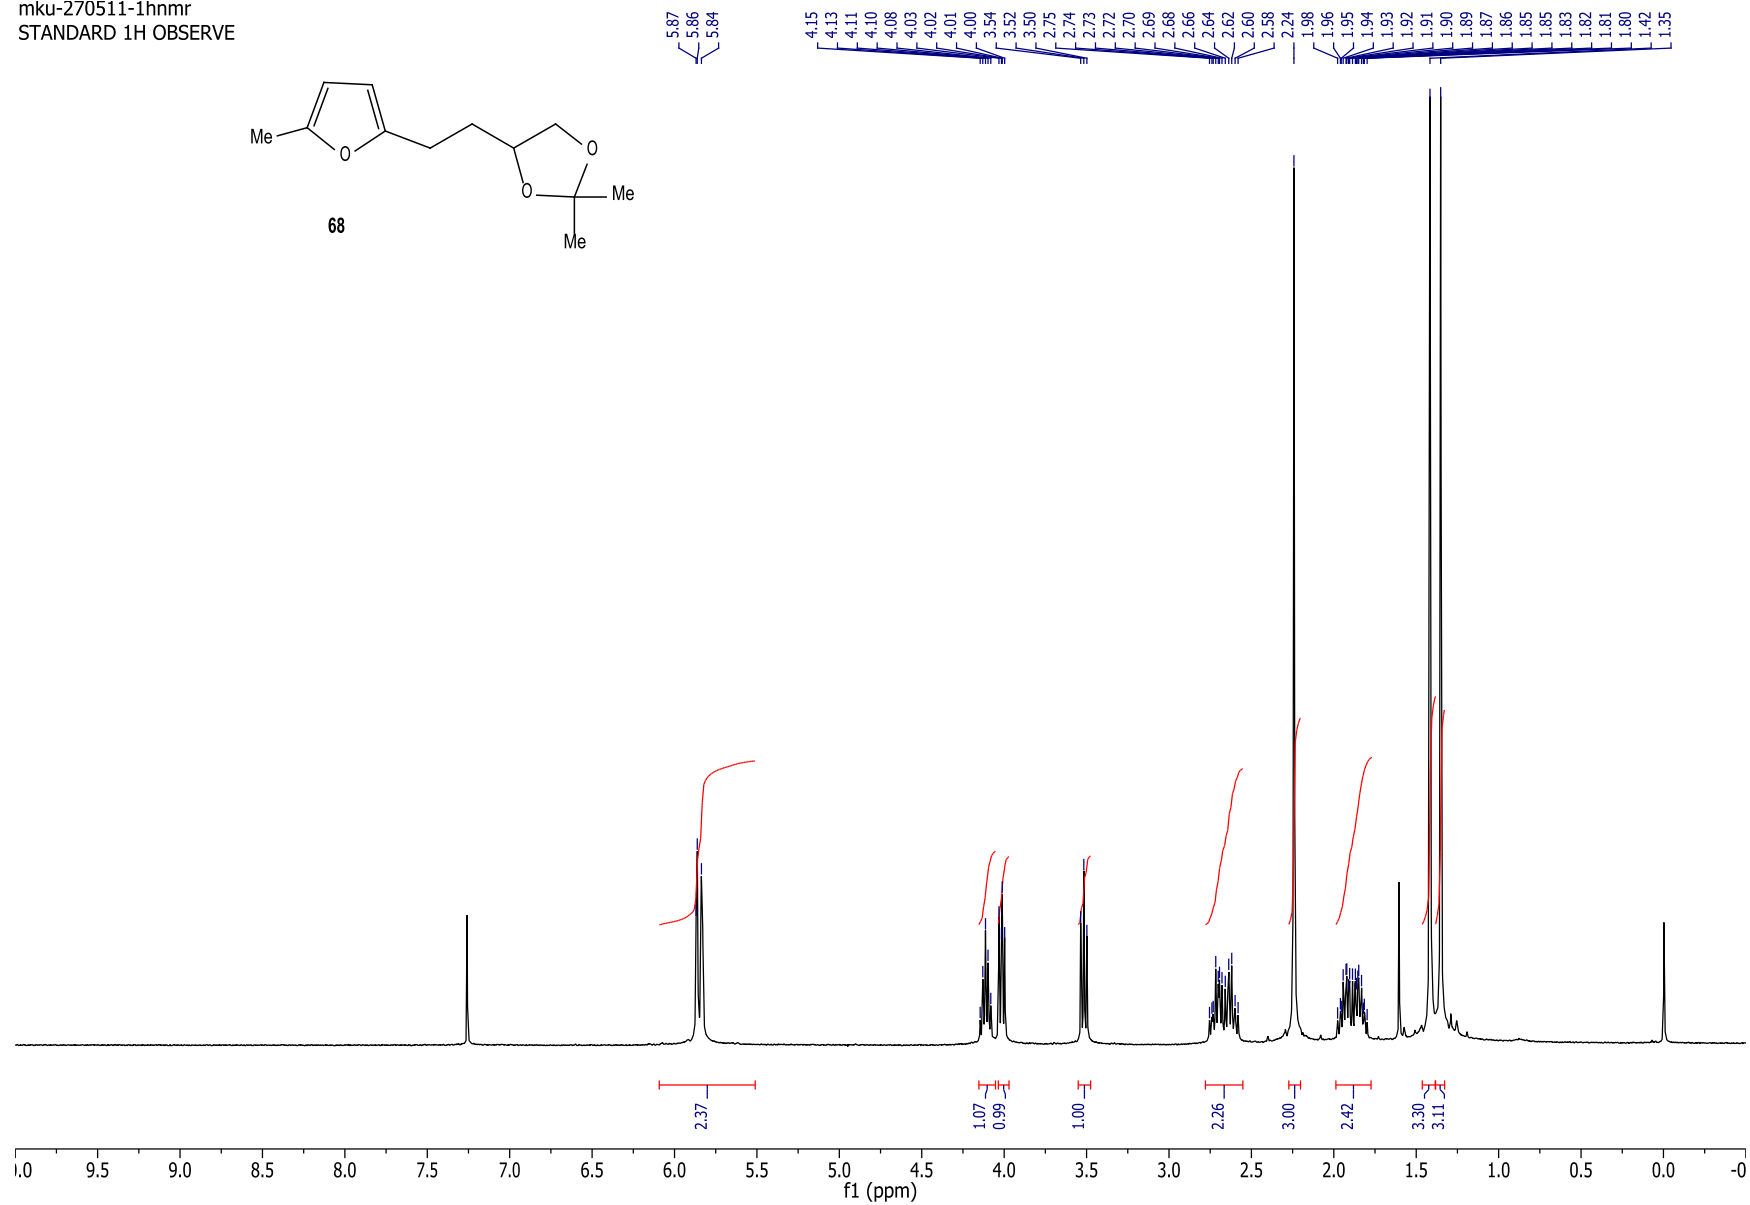



mku-270511-13cnmr  
13C OBSERVE

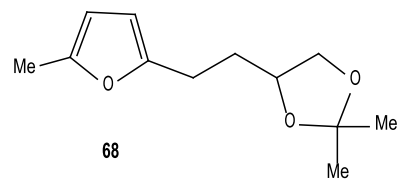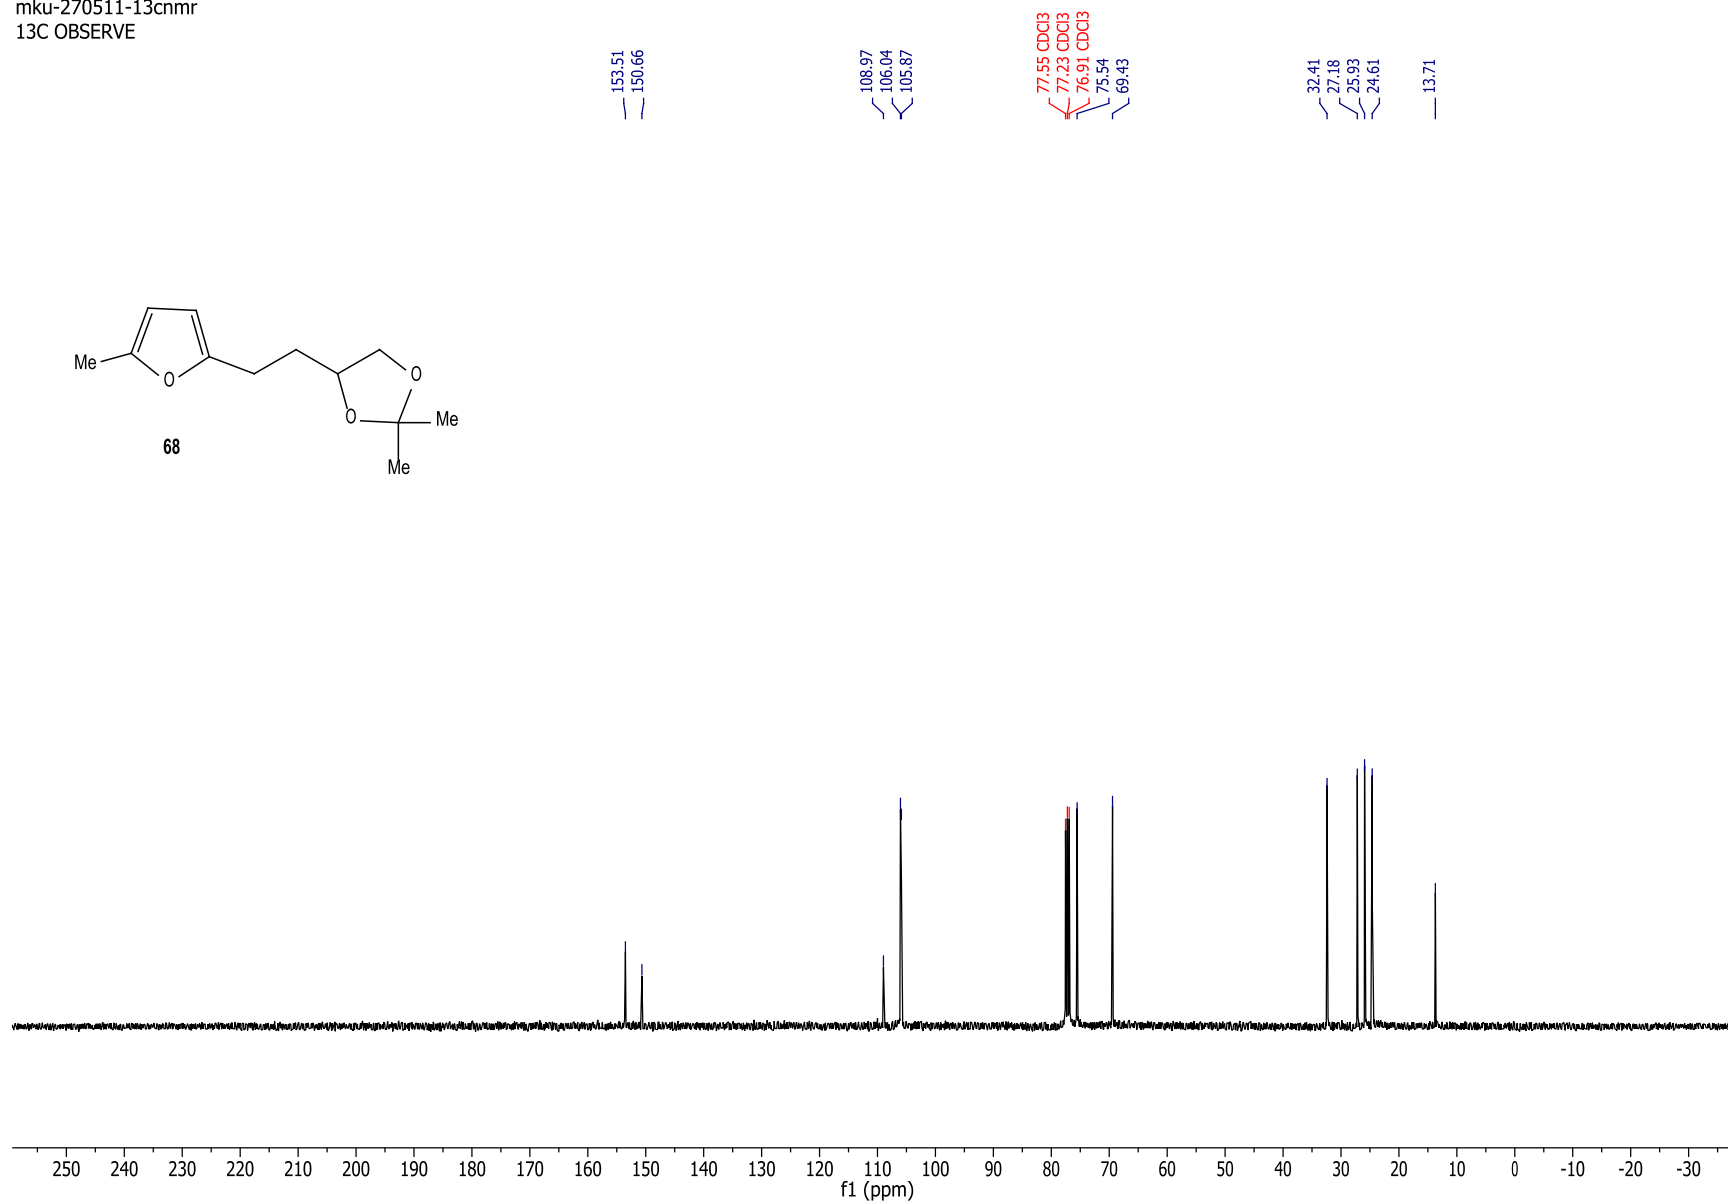

ean-140611-1hnmr  
STANDARD 1H OBSERVE

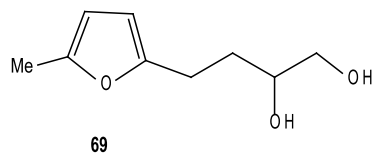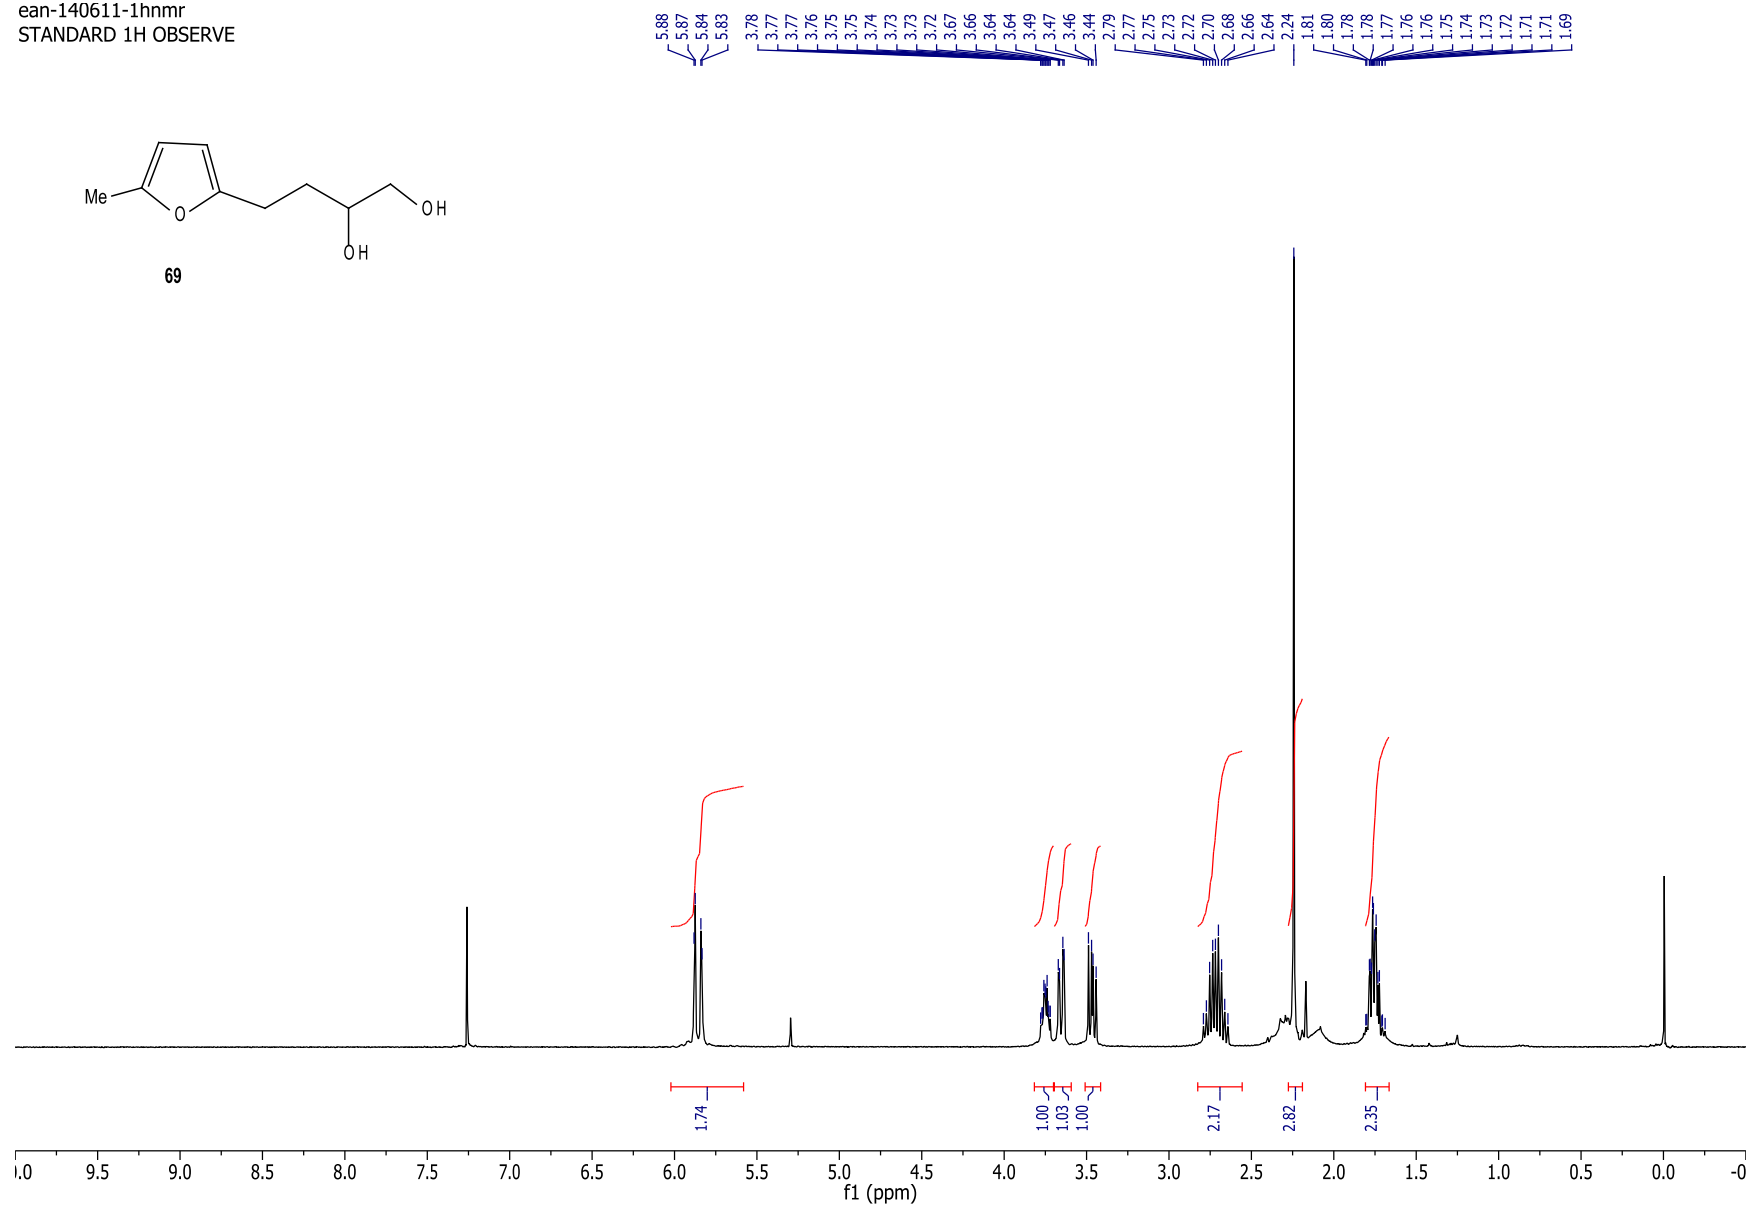

ean-140611-13cnmr  
13C OBSERVE

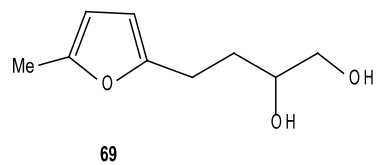

153.66  
150.76

106.10  
106.01

77.56 CDCl<sub>3</sub>  
77.24 CDCl<sub>3</sub>  
76.92 CDCl<sub>3</sub>  
71.71  
66.91

31.76

24.38

13.74

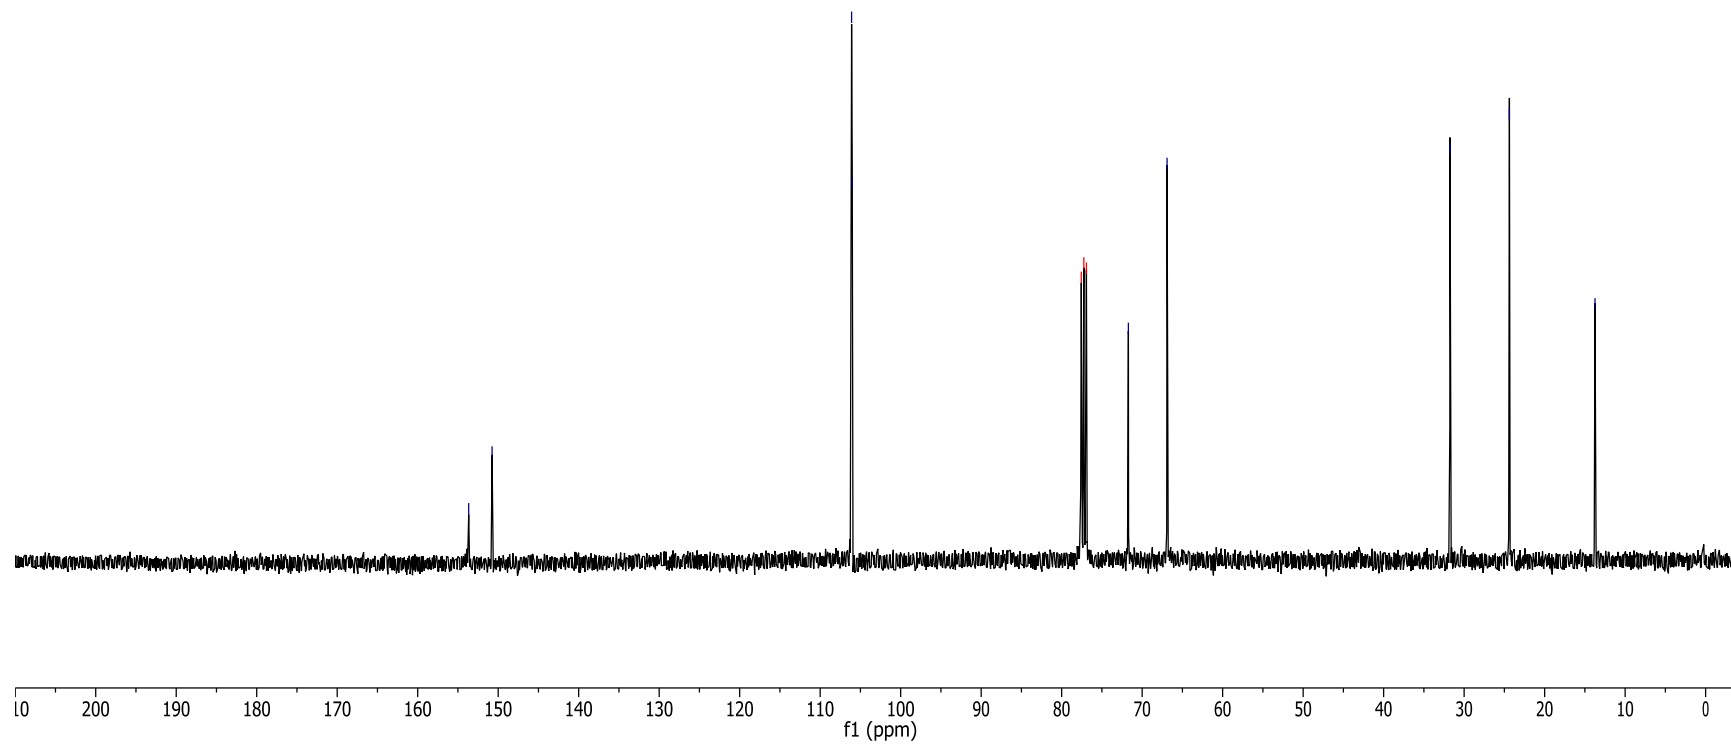

ean-2-170611-1hnmr  
STANDARD 1H OBSERVE

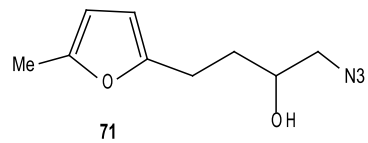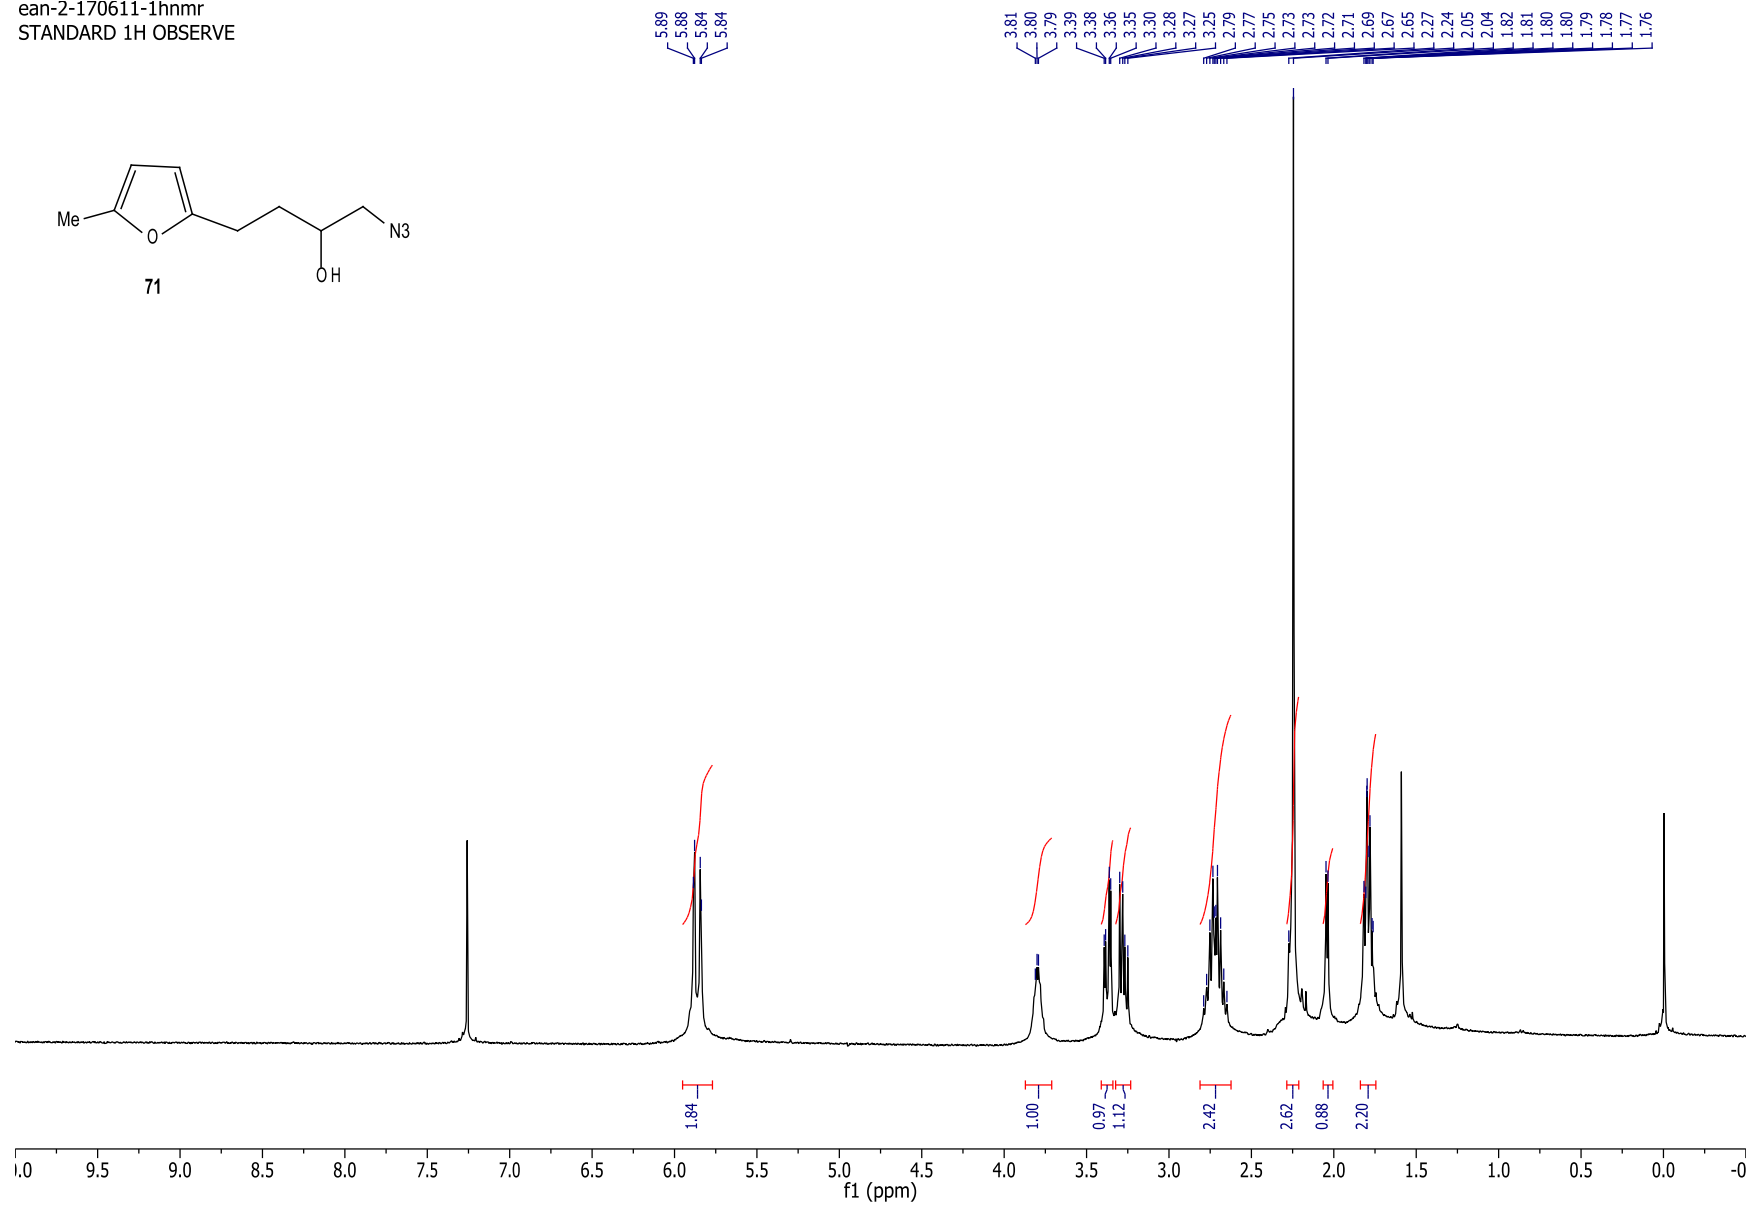

mku-ean-karbon-160611  
13C OBSERVE

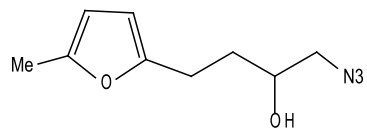

71

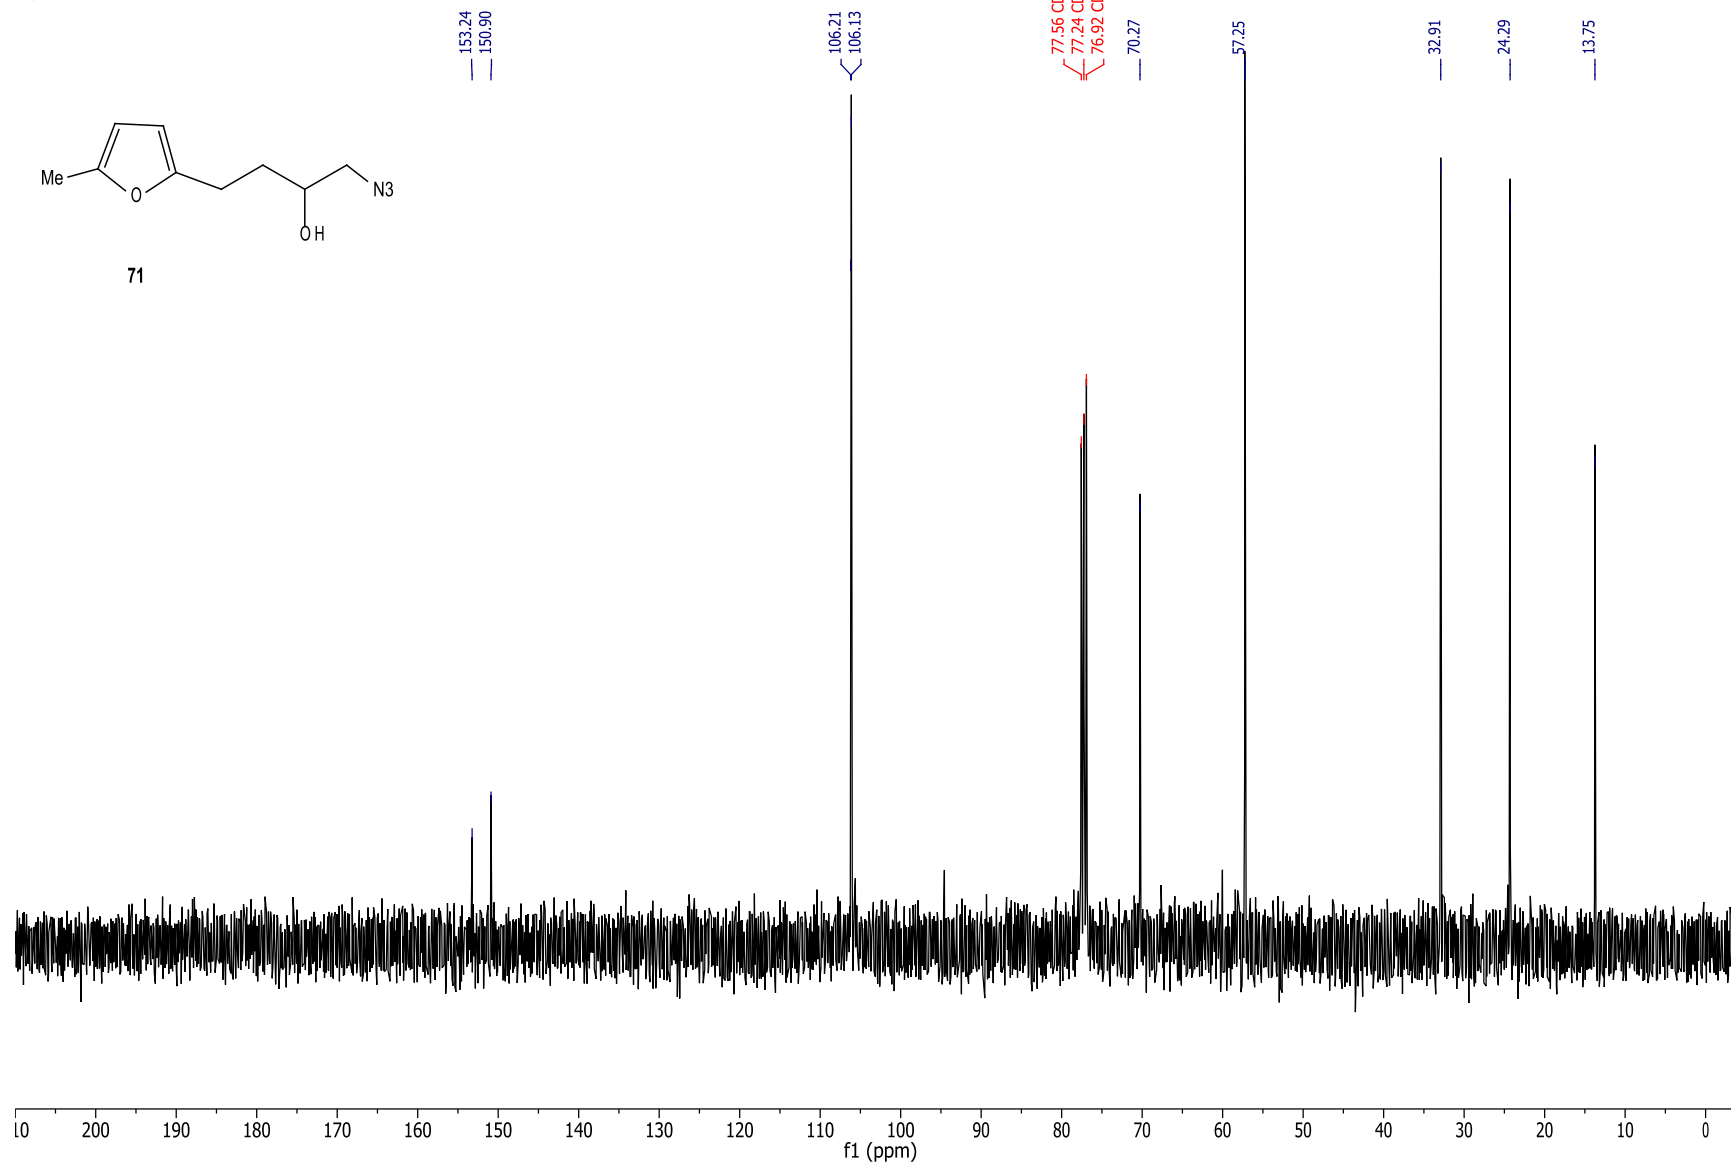

mku-130711-1hnmr  
STANDARD 1H OBSERVE

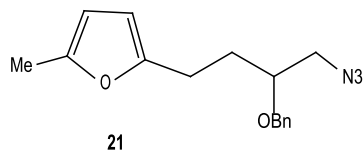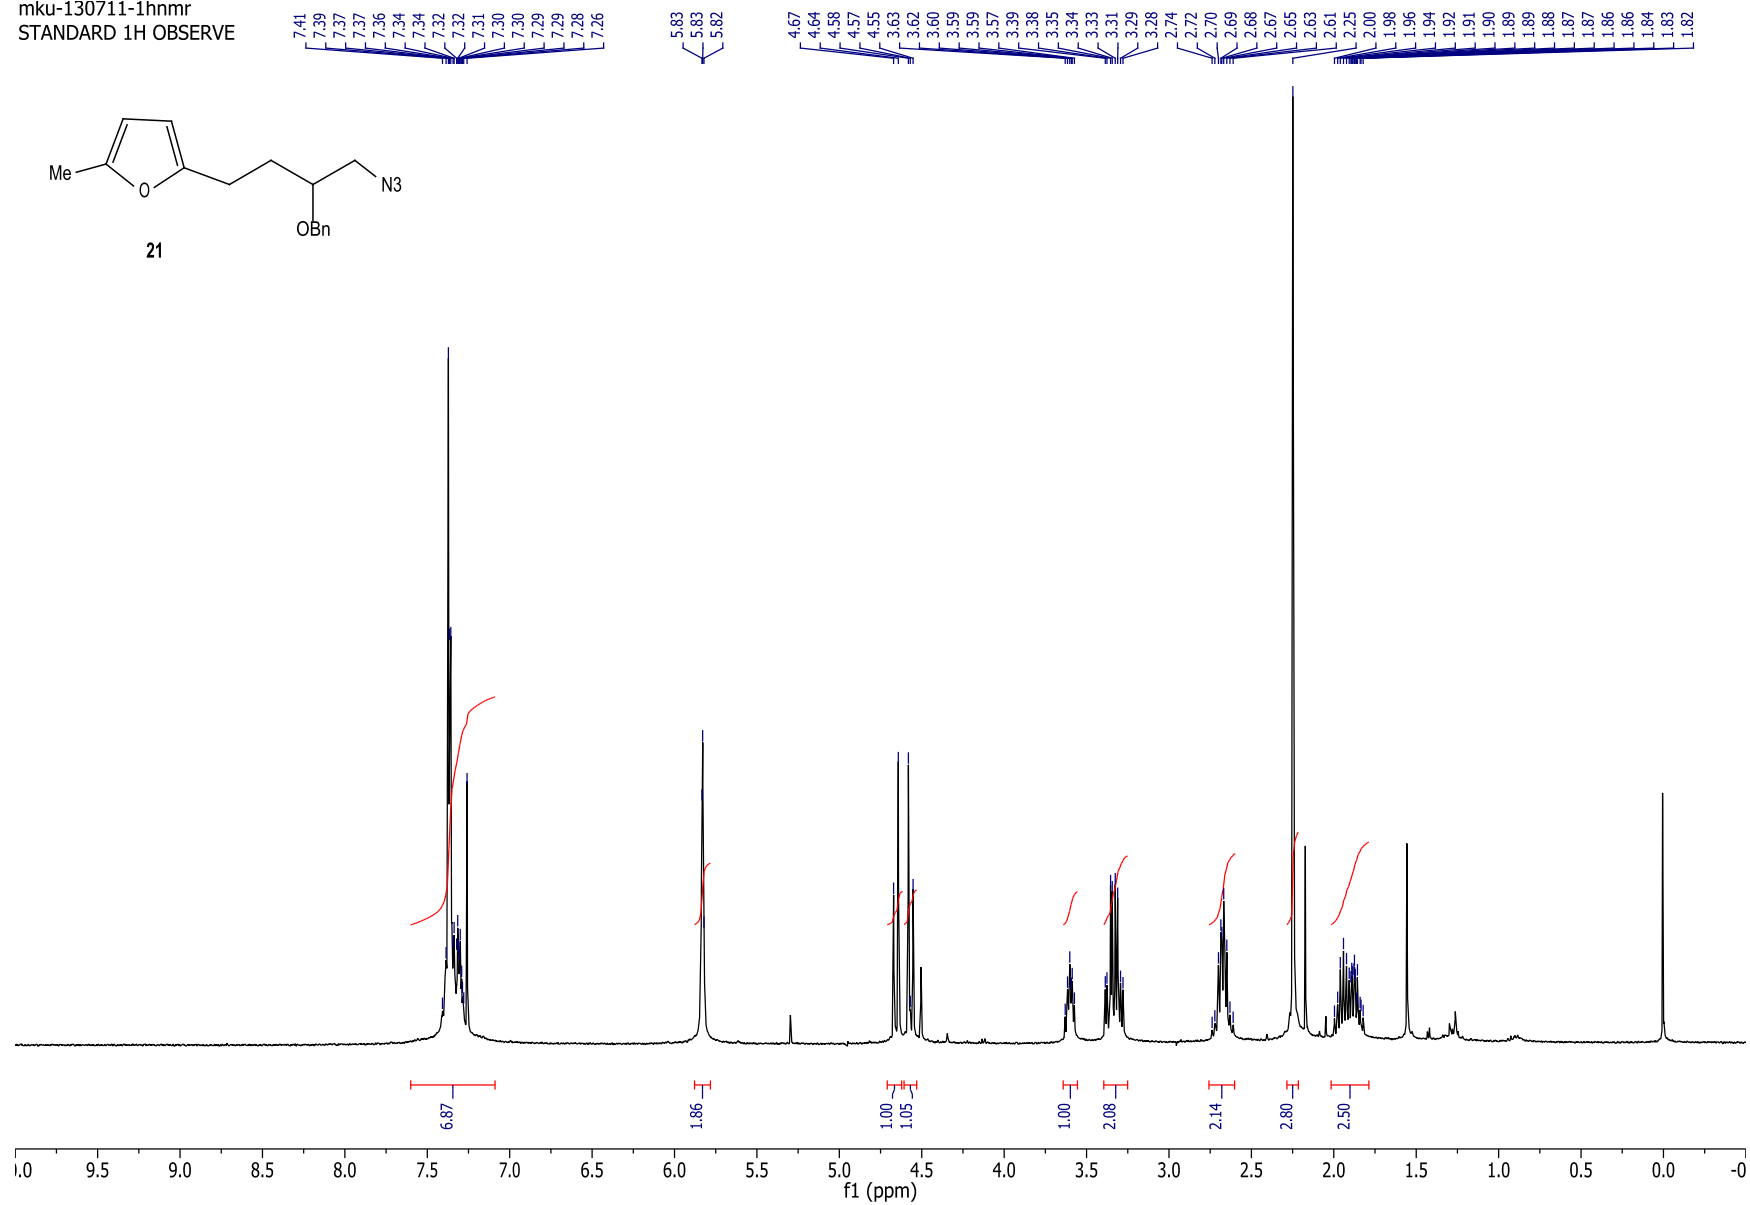

mku-130711-13cnmr  
13C OBSERVE

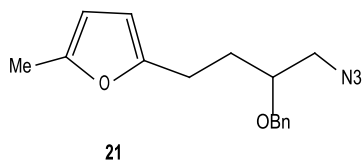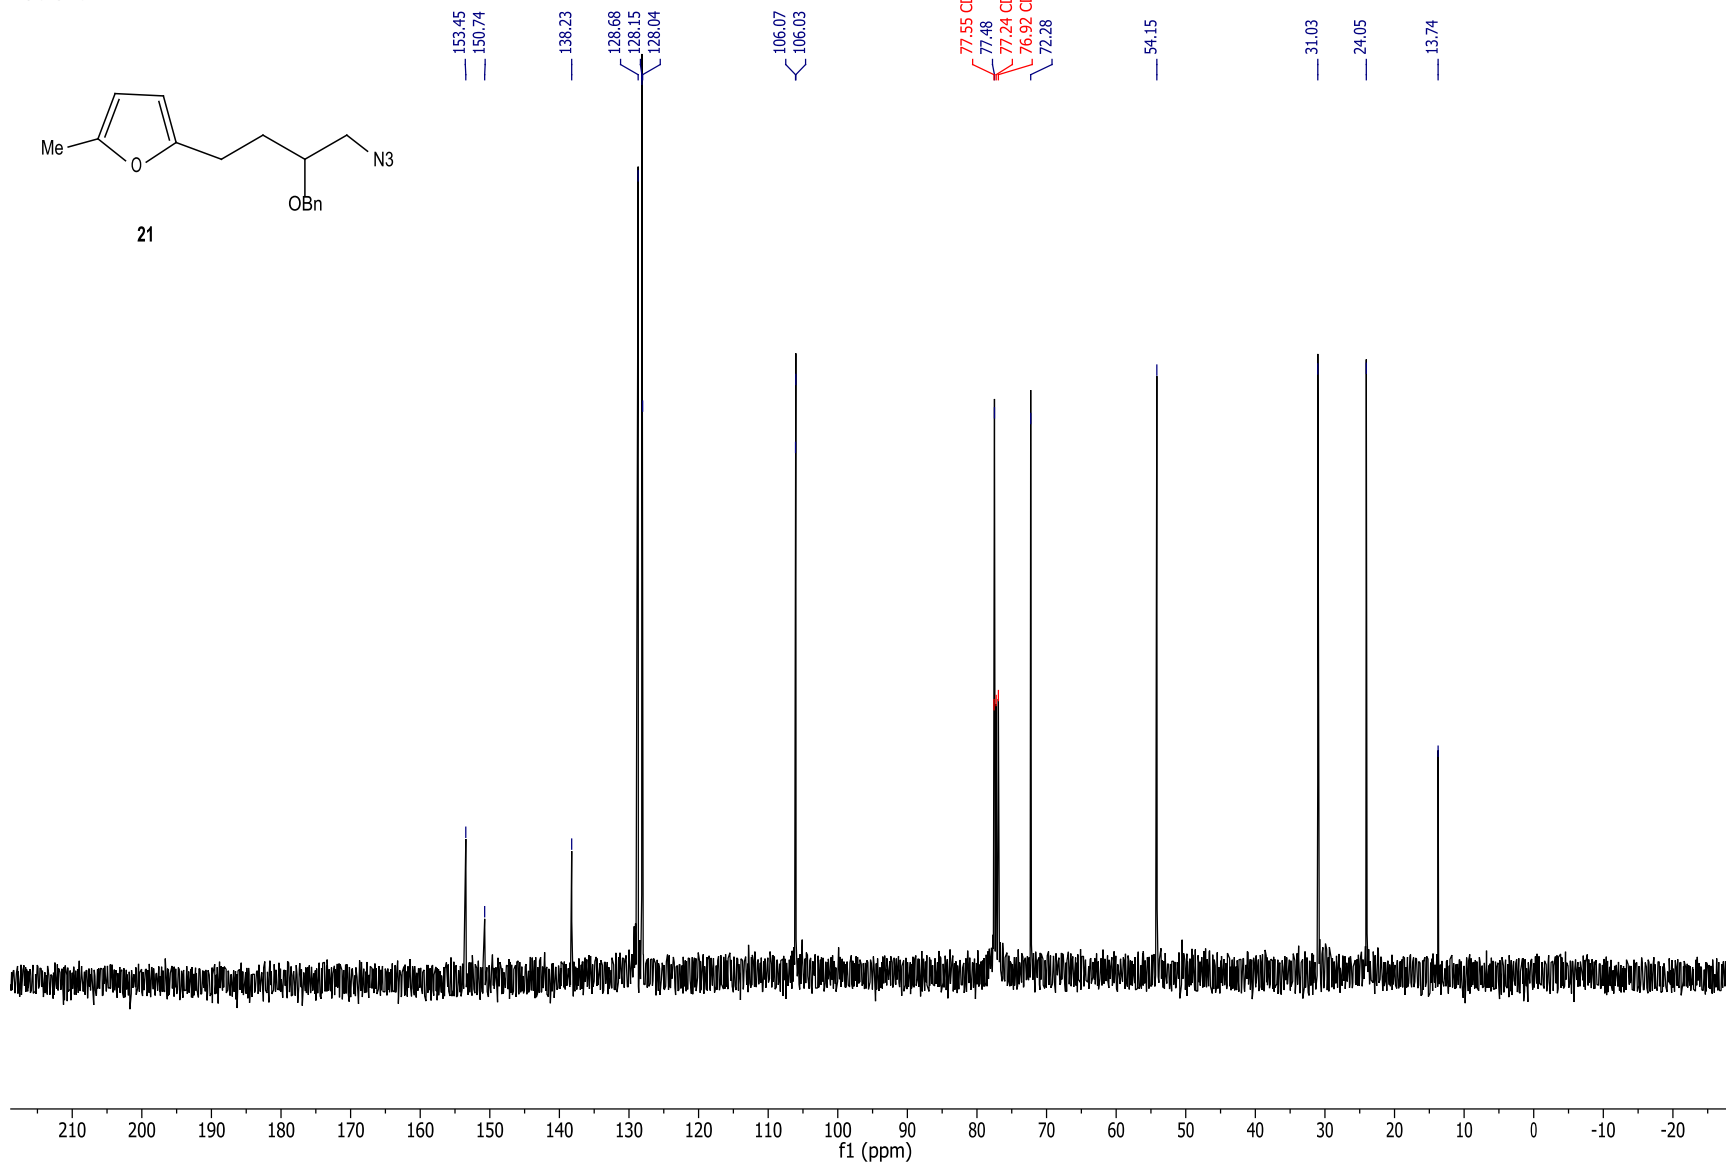

ean-110811-1hnmr  
STANDARD 1H OBSERVE

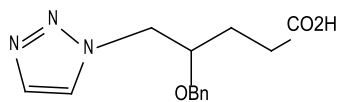

22

7.71  
7.63  
7.32  
7.30  
7.28  
7.26  
7.21  
7.20

4.58  
4.57  
4.54  
4.53  
4.47  
4.45  
4.43  
4.41  
4.39  
4.32  
4.29  
3.94

2.64  
2.50  
2.48  
2.46  
1.91  
1.89  
1.87  
1.86  
1.84  
1.82  
1.80  
1.78

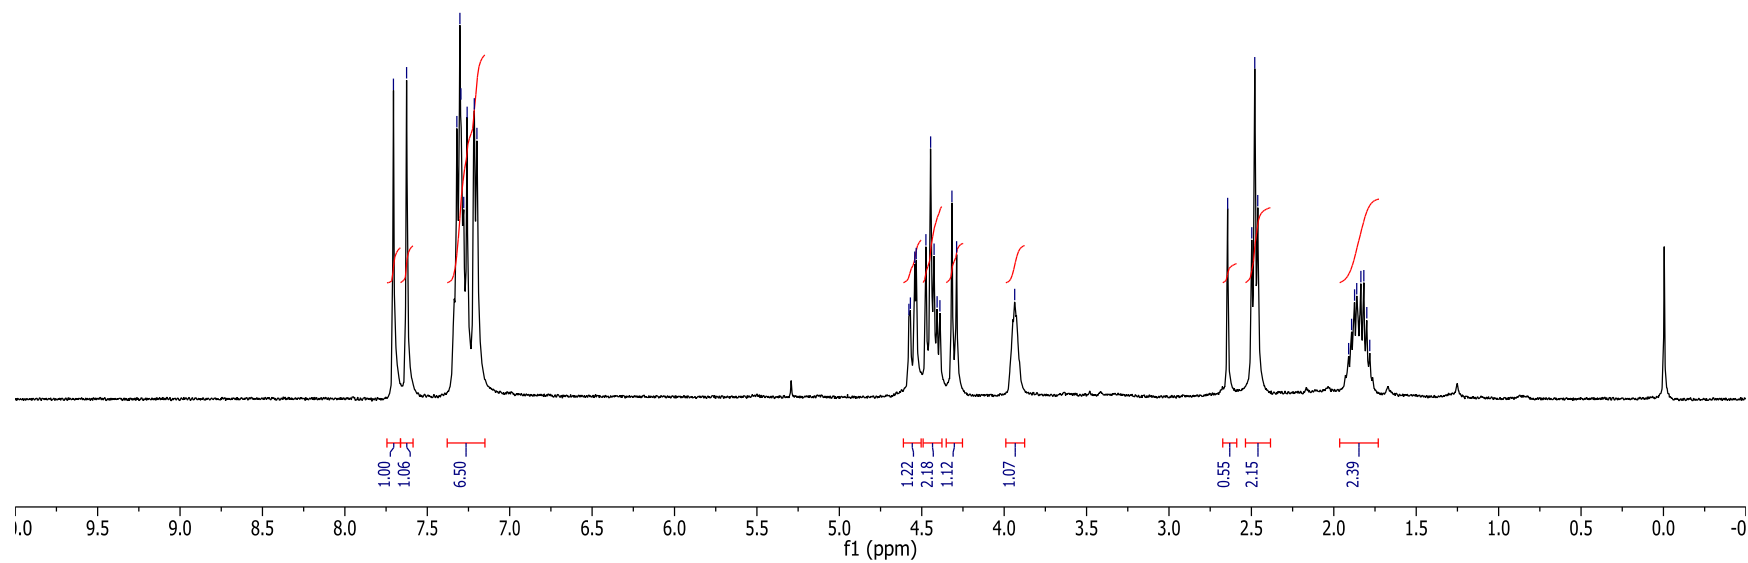



ean-110811-13cnmr  
13C OBSERVE

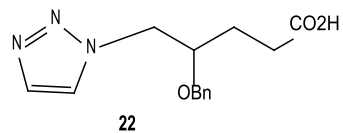

177.57  
177.45

137.50  
133.84  
128.75  
128.26  
128.12  
125.12  
125.08

77.55 CDCl3  
77.23 CDCl3  
76.91 CDCl3  
76.80  
72.58

53.37

40.77

29.50  
29.49  
27.06

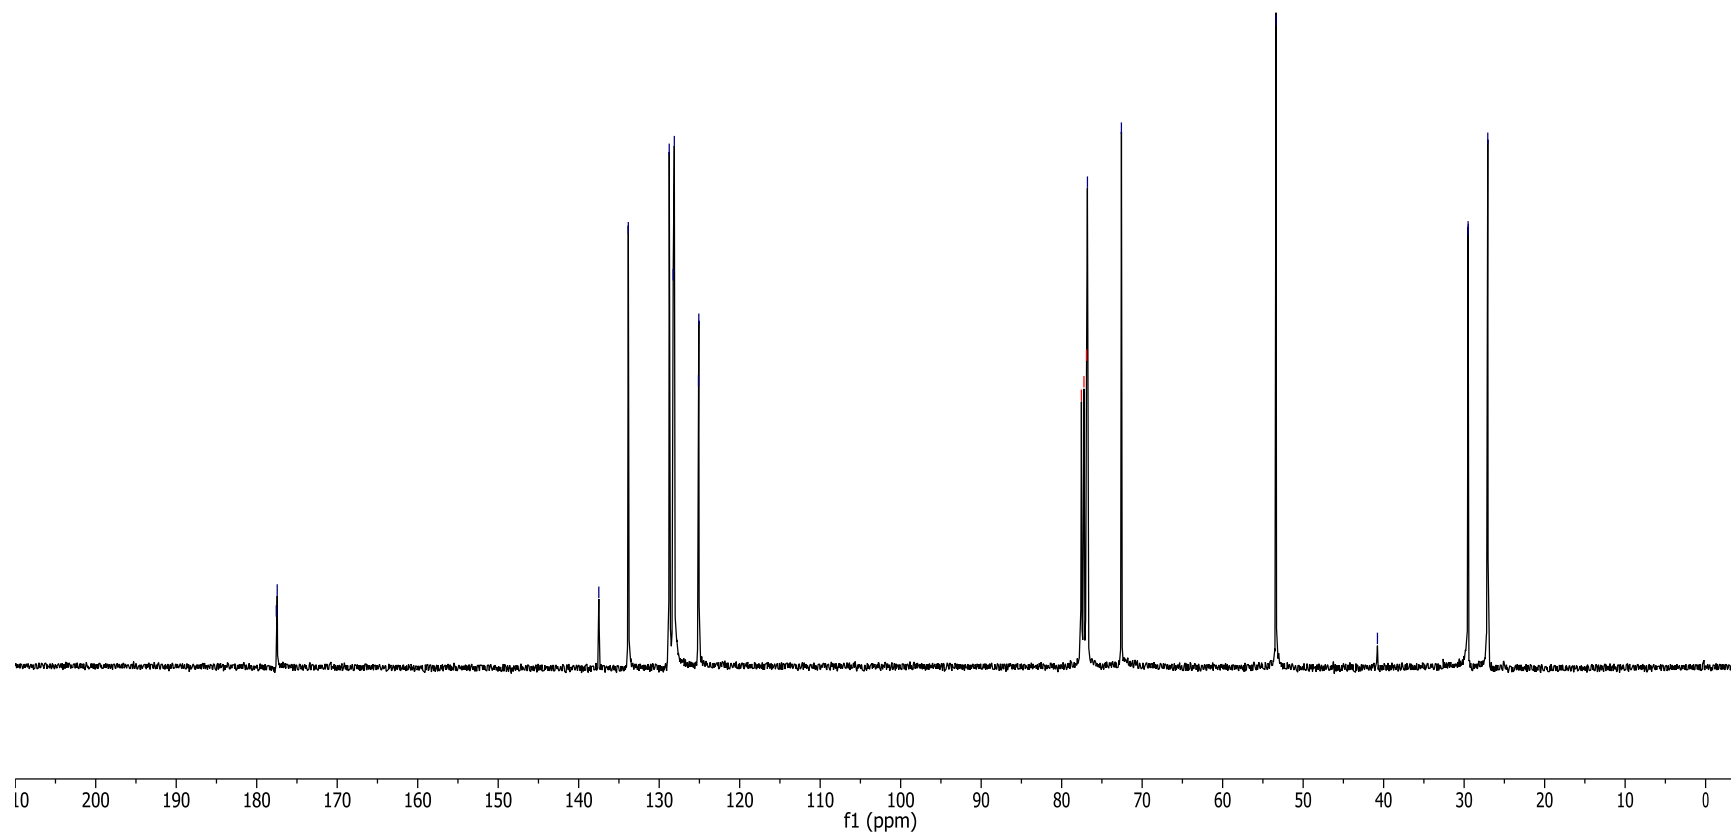

ake-060410-2-1hnmr  
STANDARD 1H OBSERVE

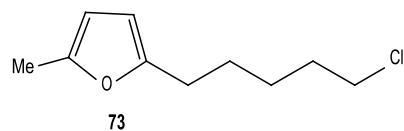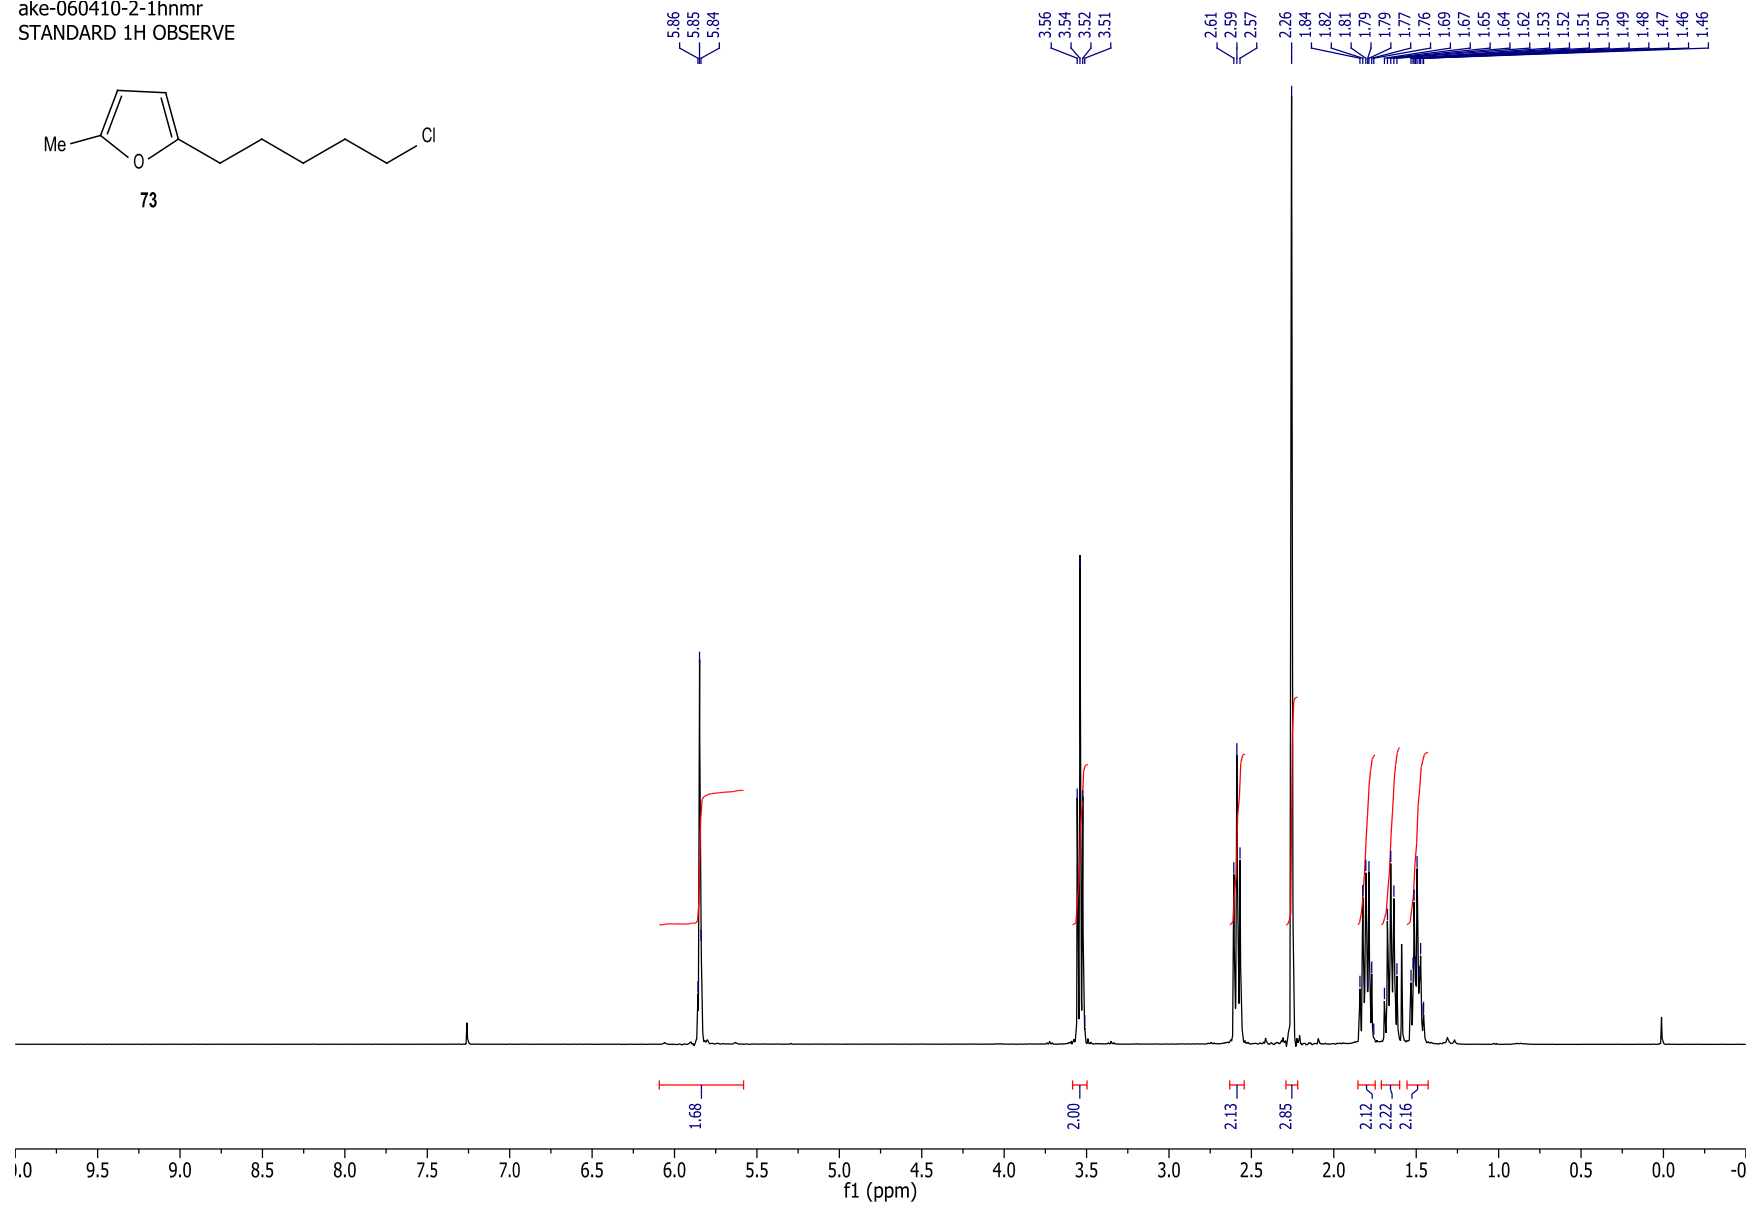

ake-060410-2-13cnmr  
13C OBSERVE

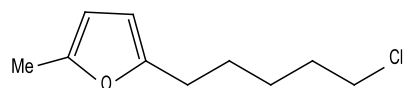

73

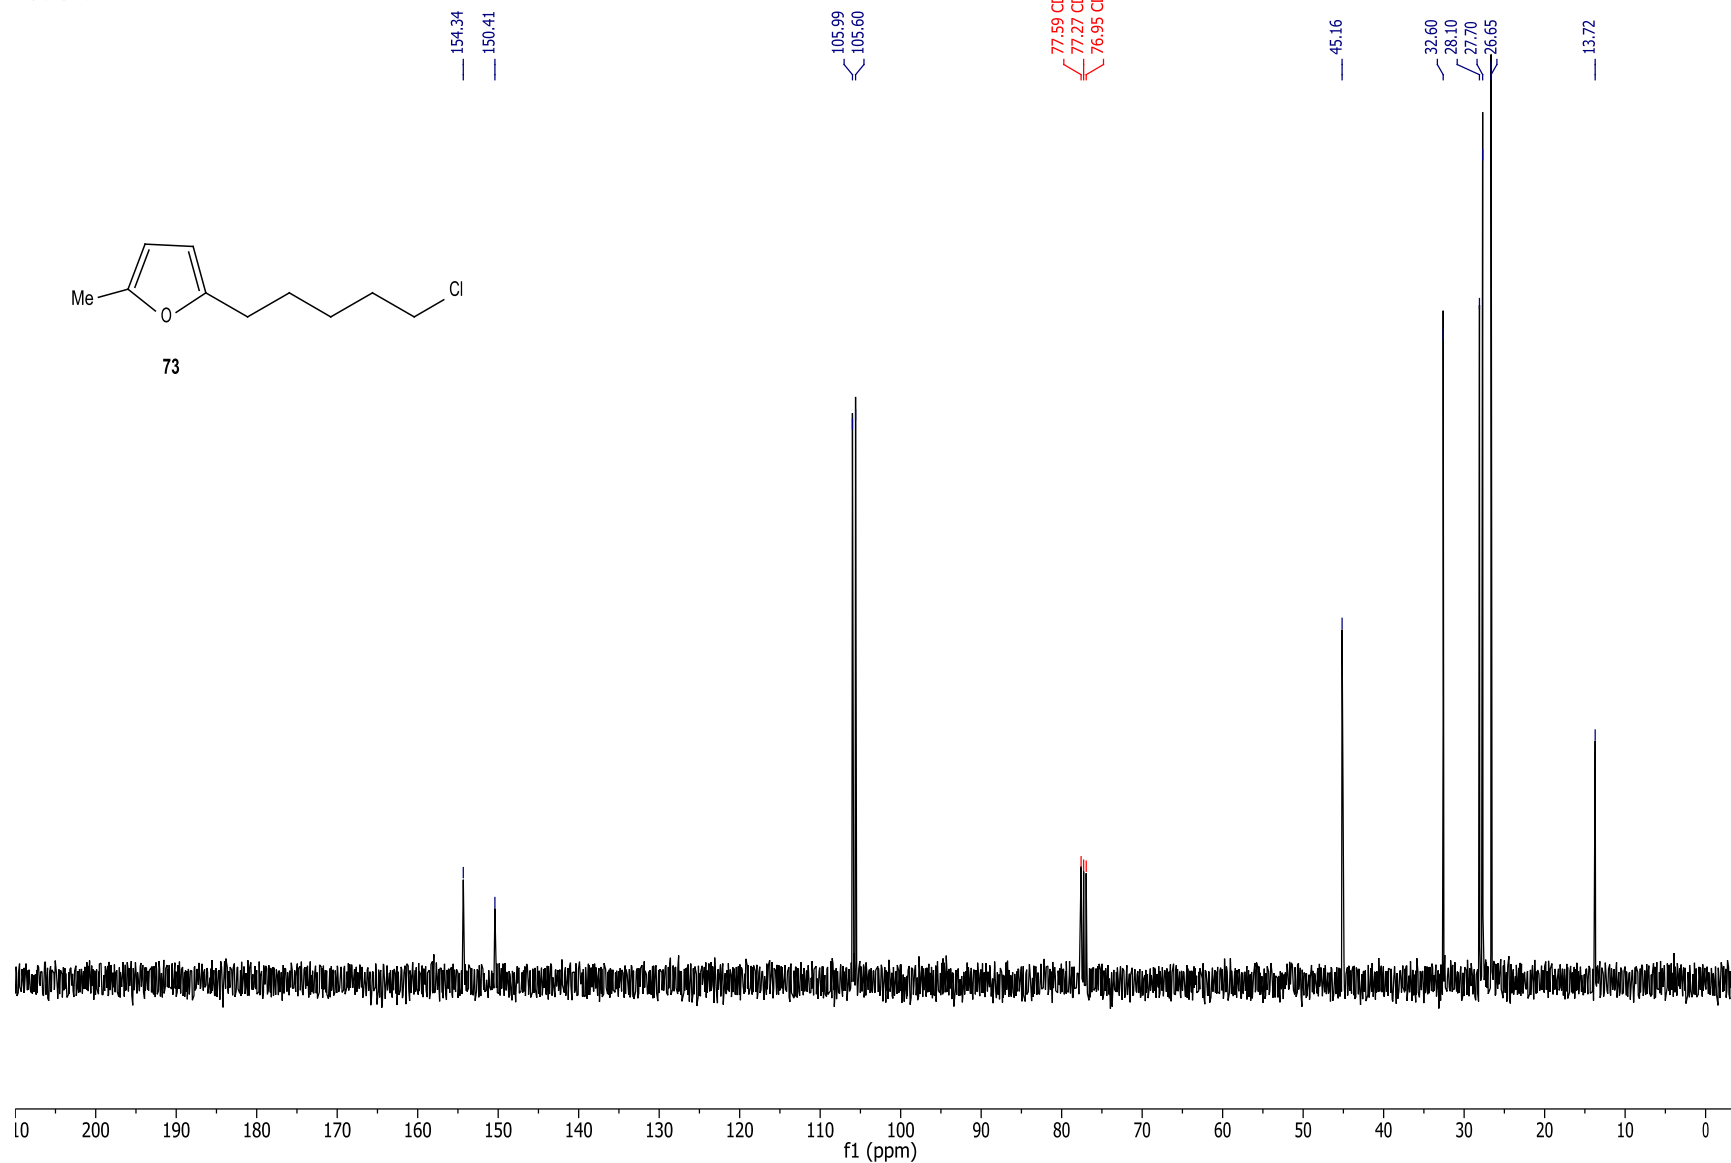

mku-090610-1hnmr  
STANDARD 1H OBSERVE

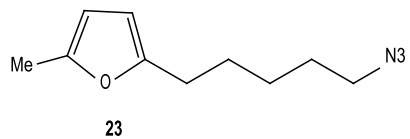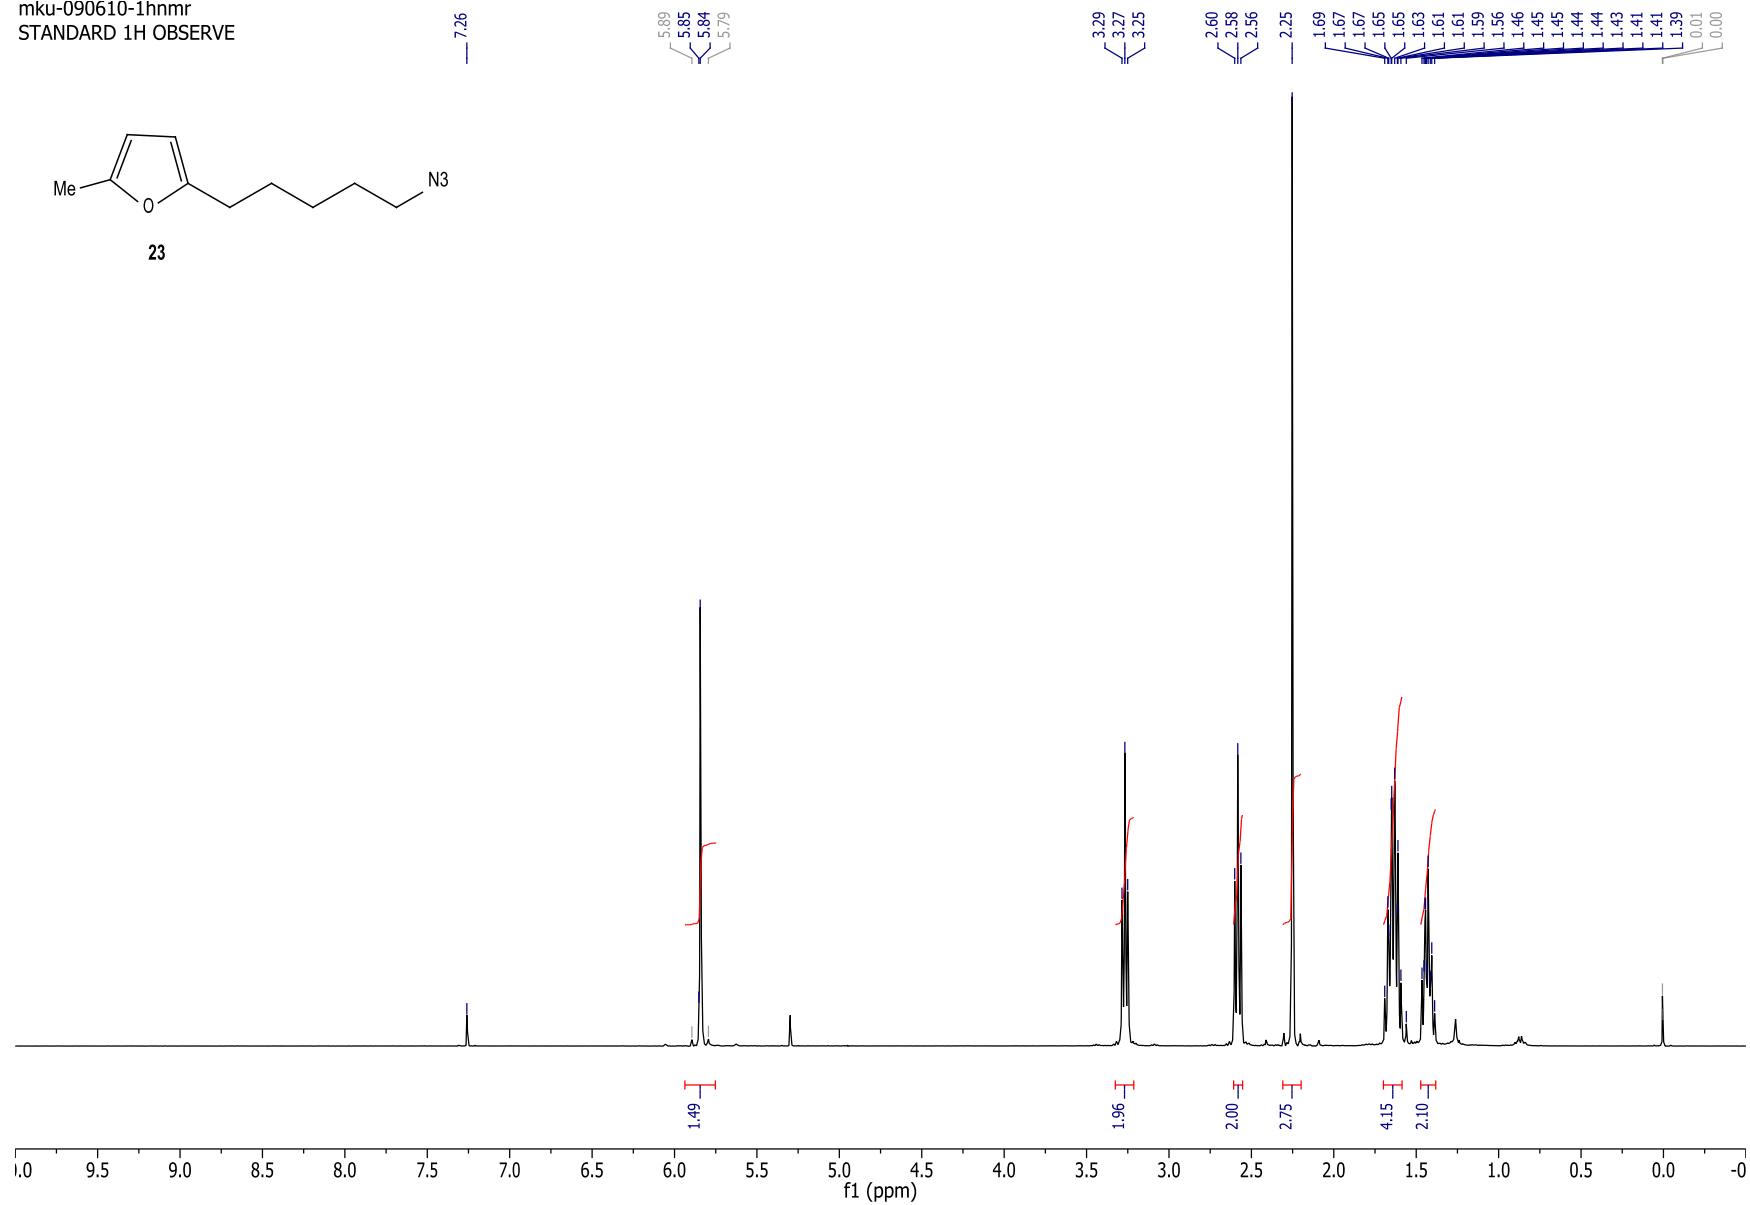

mku-090610-13cnmr  
13C OBSERVE

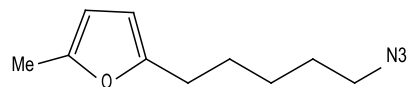

23

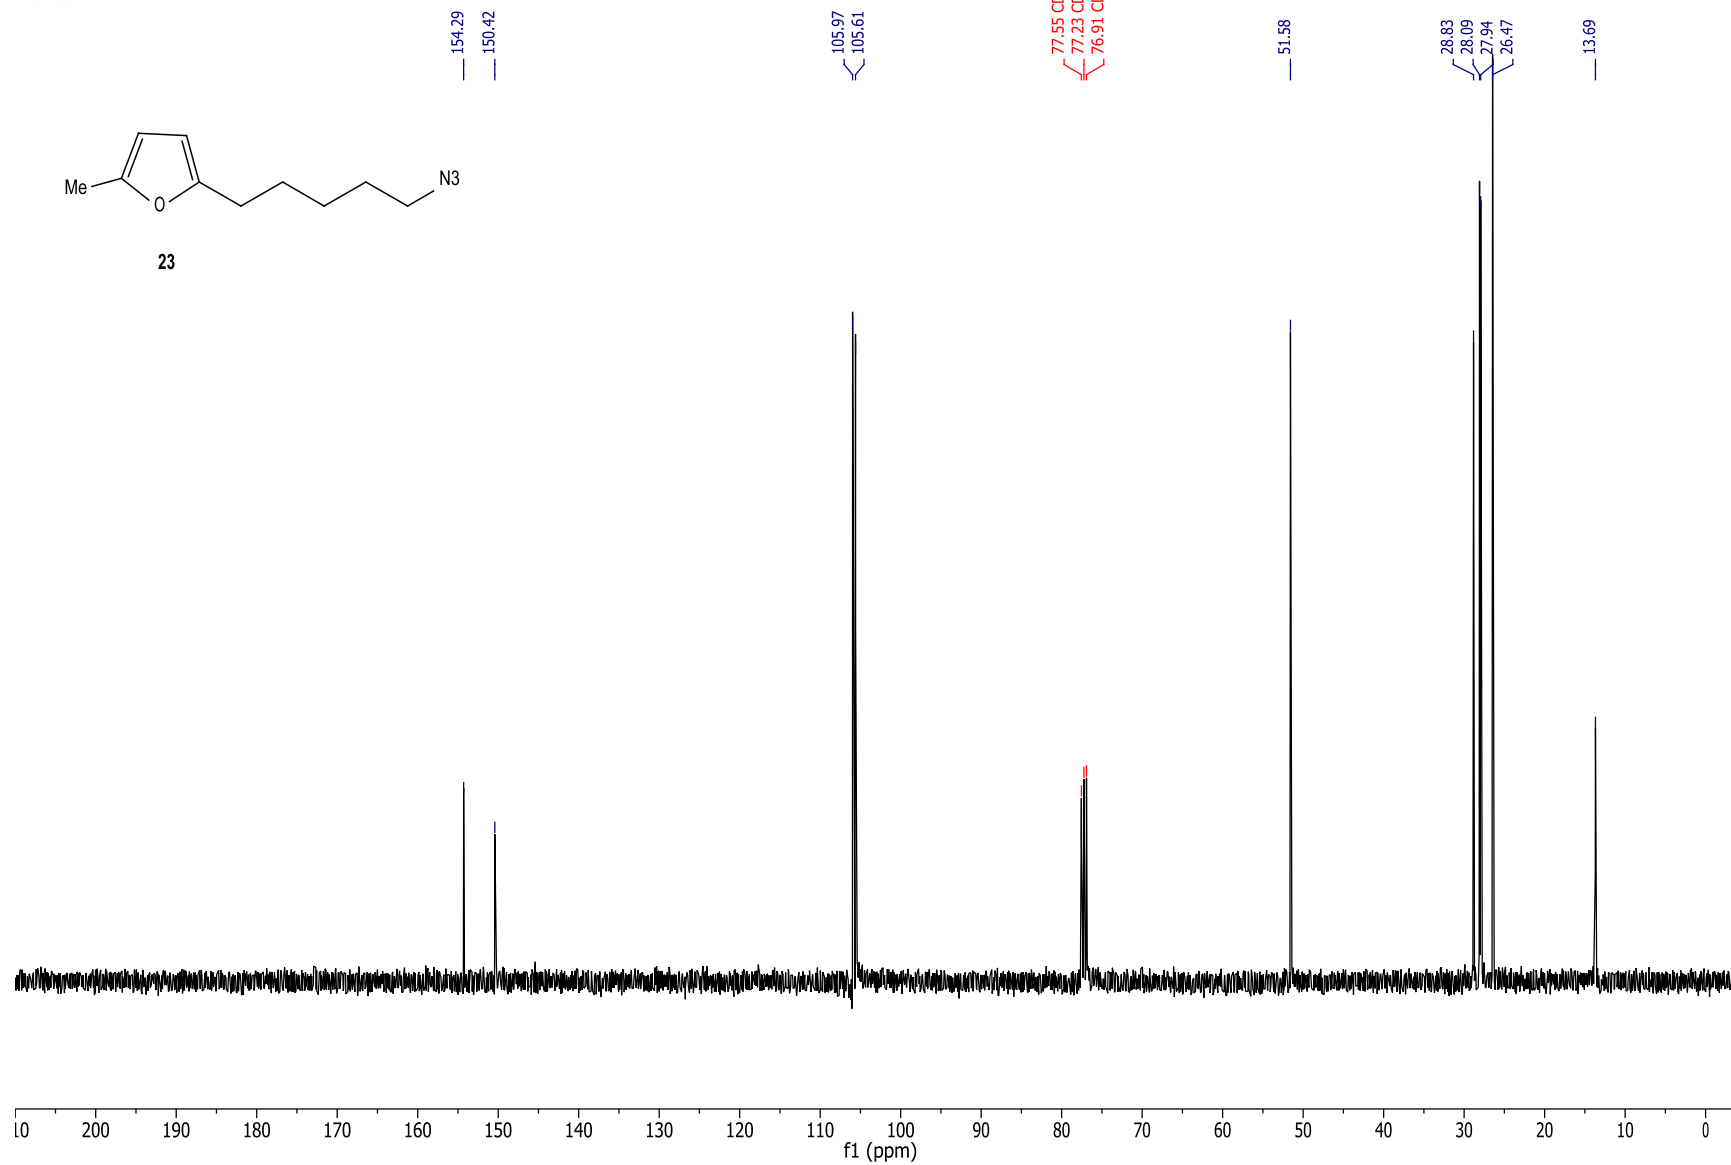

ean-151010-1hnmr  
STANDARD 1H OBSERVE

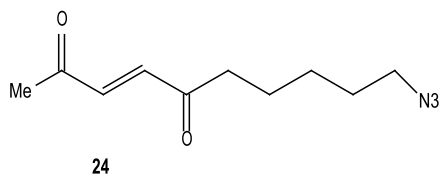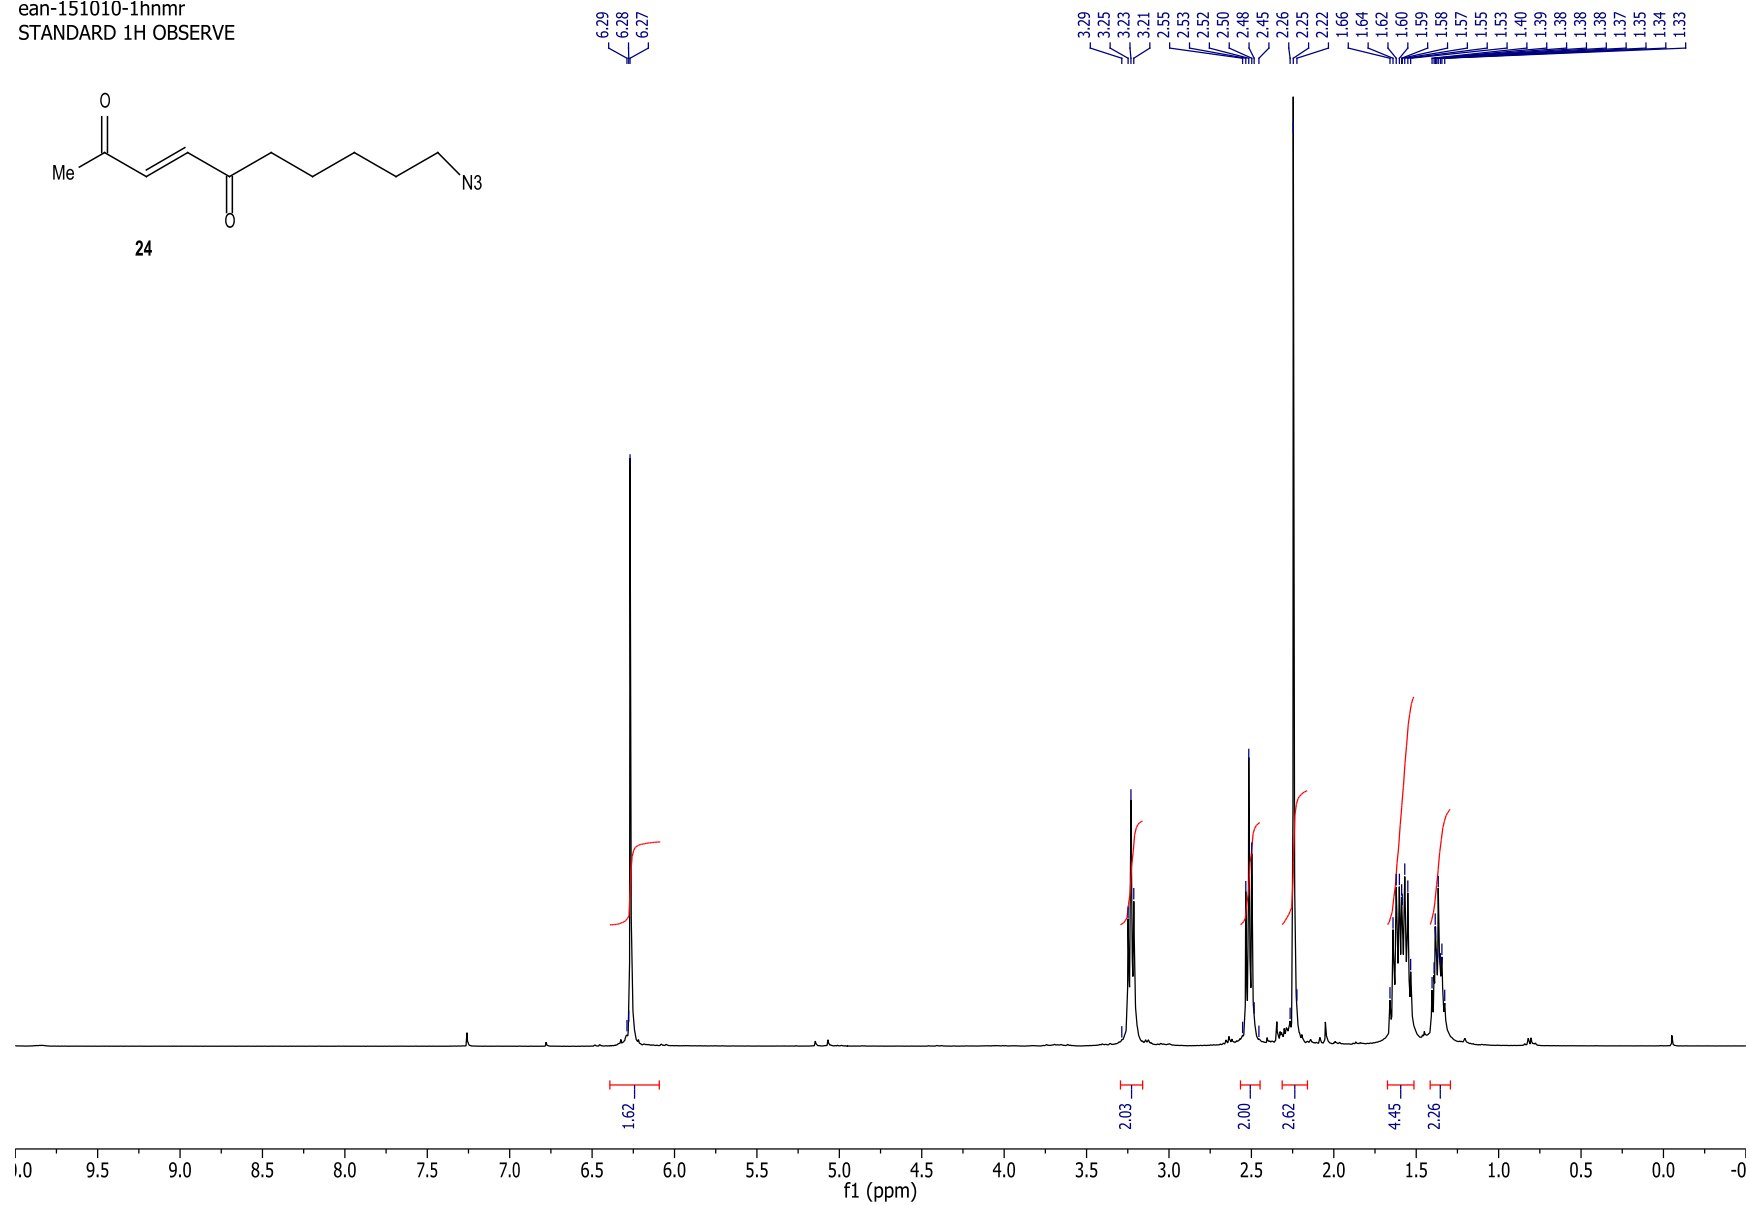

ean-151010-13cnmr 5 li  
13C OBSERVE

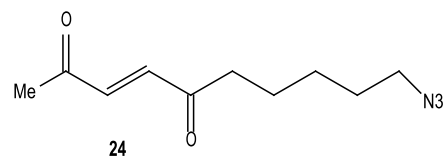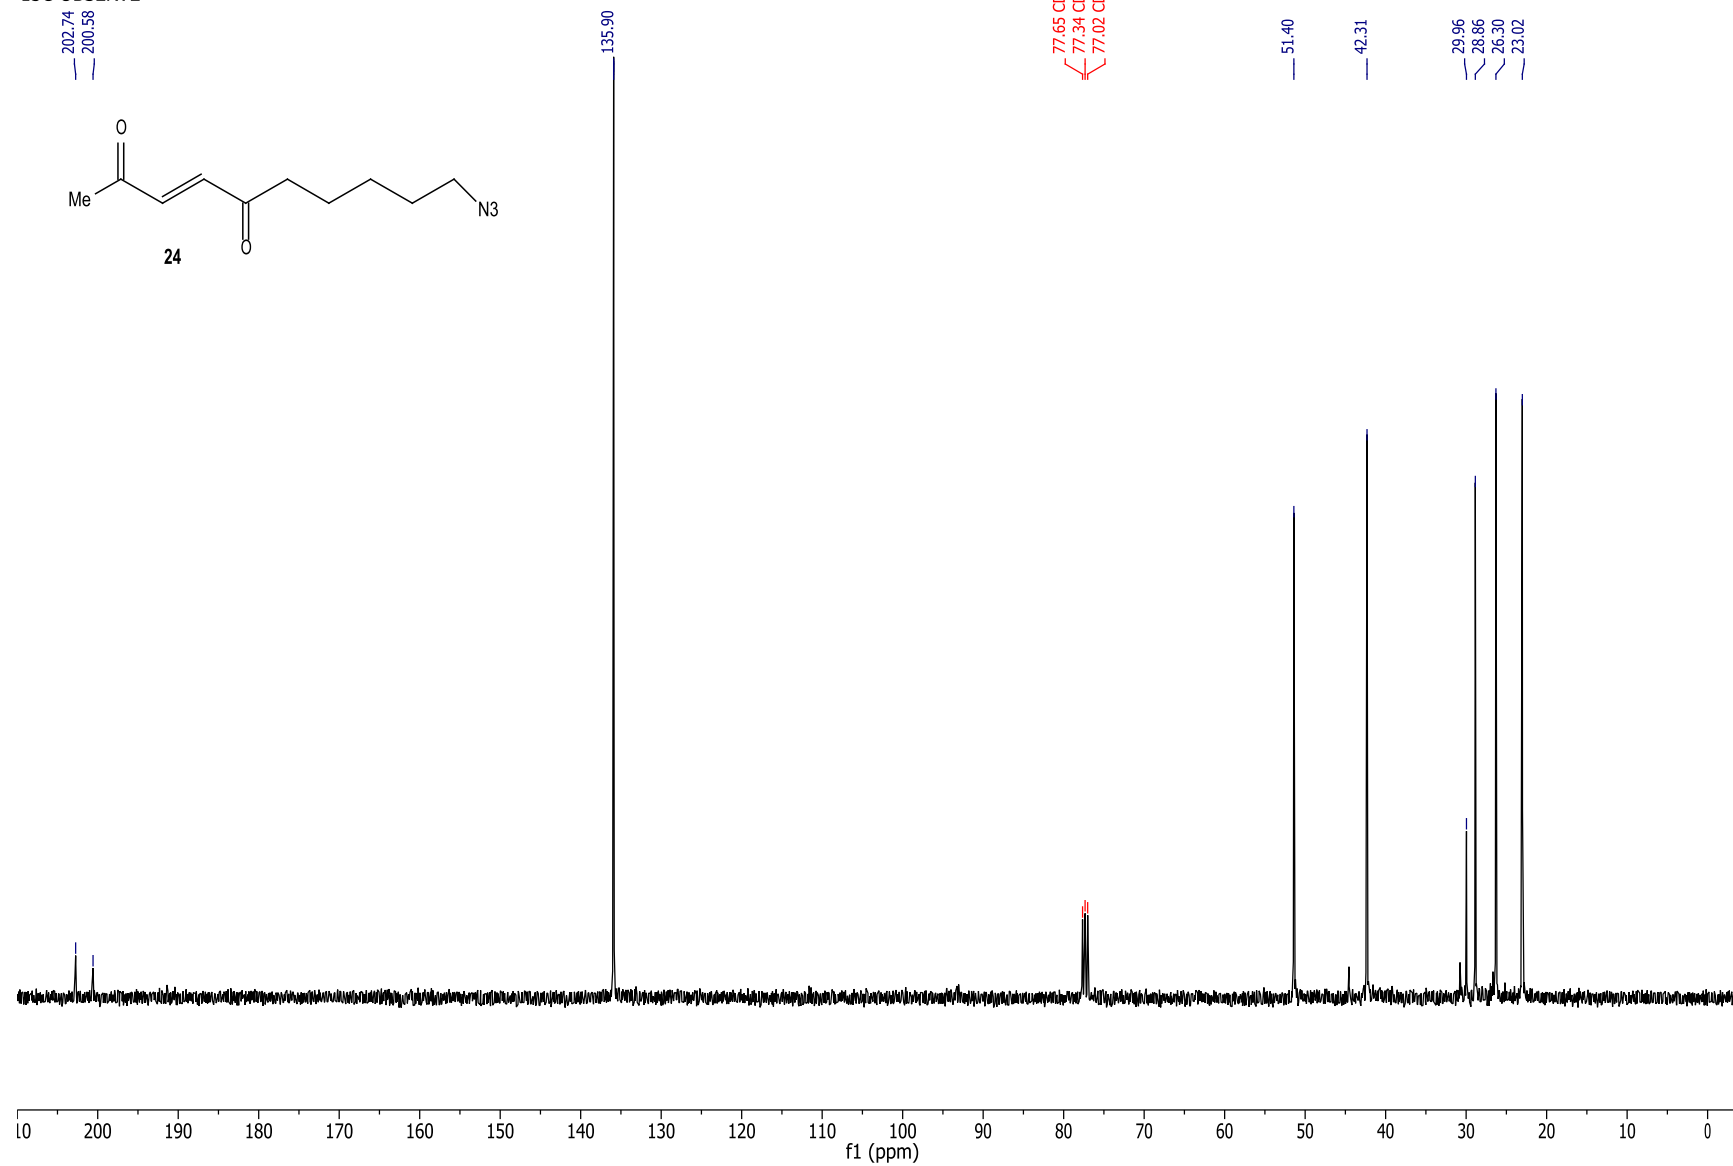

Supplement: Supplementary file 1 [file 4014592]
